# Supplementary material for: Aggregation morphology is a key factor determining protein adsorption on graphene oxide and reduced graphene oxide nanomaterials
Source: Royal Society of Chemistry journal article supplement (doi:10.1039/c8en01408f), 2019-01-01
Supplement: c8en01408f2.xlsx [file c8en01408f2.xlsx]

## Sheet: GO
Accession	Description	Mass	Score	Matches	Sequences	emPAI	Coverage			SpCi*	NpSpC*	GRAVY**	PI***
Q2UVX4	Complement C3 OS=Bos taurus GN=C3 PE=1 SV=2	188675	5219	330(225)	86(69)	4.37	45%	Q2UVX4_uniprot		0.00174904	5.81879	-0.349	6.41
G3X7A5	Complement C3 OS=Bos taurus GN=C3 PE=4 SV=1	188568	5219	330(225)	86(69)		45%	G3X7A5_uniprot			0
	Peptide	Unique	Matches	Modification	Observed	Mr(expt)	Mr(calc)	ppm	Miss	Score	#VALUE!	Rank	Query
	K.FGLEKR.Q	U	1		375.2204	748.4263	748.4232	4.21	1	30	99805.5	1	124
	K.GVFVLNK.K	U	3		388.7391	775.4636	775.4592	5.62	0	36	119767	1	236
	K.ISYIIGK.D	U	2		397.2477	792.4809	792.4745	8.01	0	41	136401	1	364
	R.VGLVAVDK.G	U	4		400.7497	799.4848	799.4804	5.51	0	57	189630	1	416
	K.WLILEK.Q	U	4		401.2494	800.4843	800.4796	5.86	0	27	89824.9	1	425
	R.LPYSVVR.N	U	3		417.2495	832.4843	832.4807	4.40	0	34	113113	1	603
	R.SVQLMEK.R	U	2		417.7259	833.4372	833.4317	6.67	0	28	93151.8	1	608
	R.DGALELAR.S	U	3		422.7325	843.4505	843.4450	6.55	0	46	153035	1	669
	R.WLNEQR.Y	U	3		423.2192	844.4238	844.4191	5.54	0	39	129747	1	743
	K.DLCETVK.W	U	1		432.7128	863.4110	863.4059	5.93	0	16	53229.6	1	834
	K.LMNVFLK.D	U	3		432.7562	863.4978	863.4939	4.50	0	35	116440	1	839
	K.L->M<-NVFLK.D	U	1	Oxidation (M)	440.7545	879.4945	879.4888	6.47	0	(28)	-93151.8	1	944
	K.GVFVLNKK.N	U	4		452.7868	903.5590	903.5542	5.32	1	33	109786	1	1046
	R.AILYNYR.E	U	4		456.7534	911.4922	911.4865	6.32	0	38	126420	1	1108
	R.DPLTITVR.T	U	6		457.7724	913.5302	913.5233	7.56	0	38	126420	1	1131
	K.LSINTQNK.R	U	2		459.2586	916.5026	916.4978	5.28	0	46	153035	1	1141
	K.LEGDRLTK.F	U	1		466.2668	930.5191	930.5134	6.08	1	25	83171.2	1	1169
	R->.<-QESLELIR.K	U	1	Gln->pyro-Glu (N-term Q)	485.7673	969.5201	969.5131	7.24	0	54	179650	1	1437
	R.QESLELIR.K	U	2		494.2800	986.5454	986.5396	5.84	0	(49)	-163016	1	1552
	R.SVQLMEKR.M	U	1		495.7761	989.5376	989.5328	4.90	1	31	103132	1	1581
	K.AGQYSSDLR.K	U	1		498.7439	995.4732	995.4672	6.01	0	47	156362	1	1622
	R.KIWDVVEK.A	U	6		508.7968	1015.5791	1015.5702	8.77	1	56	186304	1	1766
	K.IGLHEVEVK.A	U	3		512.2987	1022.5829	1022.5760	6.68	0	41	136401	1	1828
	R.ISLTHSLTR.V	U	2		514.3011	1026.5876	1026.5822	5.30	0	51	169669	1	1867
	K.RDPLTITVR.T	U	2		357.5513	1069.6320	1069.6244	7.10	1	37	123093	1	2190
	K.LSINTQNKR.D	U	1		358.5414	1072.6022	1072.5989	3.12	1	(36)	-119767	1	2197
	K.LSINTQNKR.D	U	1		537.3088	1072.6031	1072.5989	3.96	1	46	153035	1	2198
	K.GYTQQLAFR.Q	U	3		542.2858	1082.5571	1082.5509	5.75	0	57	189630	1	2247
	K.LCHKDTCR.C	U	1		545.2527	1088.4909	1088.4855	4.97	1	21	69863.8	1	2311
	K.ADIGCTPGSGR.N	U	1		545.7546	1089.4946	1089.4873	6.69	0	39	129747	1	2324
	K.NTLIIYLDK.V	U	1		546.8223	1091.6301	1091.6226	6.85	0	17	56556.4	1	2342
	K.DSCMGTLVVK.N	U	2		555.2745	1108.5344	1108.5257	7.87	0	45	149708	1	2492
	R.QESLELIRK.G	U	2		558.3275	1114.6405	1114.6346	5.28	1	37	123093	1	2567
	K.AGQYSSDLRK.C	U	1		375.5303	1123.5691	1123.5622	6.15	1	(22)	-73190.7	1	2676
	K.AGQYSSDLRK.C	U	1		562.7919	1123.5692	1123.5622	6.25	1	34	113113	1	2677
	K.GSMILDICTK.Y	U	4		569.2902	1136.5659	1136.5570	7.85	0	(32)	-106459	1	2811
	K.RQESLELIR.K	U	3		381.8904	1142.6492	1142.6407	7.43	1	48	159689	1	2890
	K.RQESLELIR.K	U	3		572.3322	1142.6499	1142.6407	8.00	1	(41)	-136401	1	2894
	K.TSQGLETQQR.A	U	1		574.2928	1146.5710	1146.5629	7.08	0	32	106459	1	2903
	K.GS->M<-ILDICTK.Y	U	1	Oxidation (M)	577.2870	1152.5594	1152.5519	6.55	0	38	126420	1	2929
	R.TKKDNIPEGR.Q	U	3		579.3199	1156.6252	1156.6200	4.51	2	51	169669	1	2968
	R.TKKDNIPEGR.Q	U	3		386.5494	1156.6265	1156.6200	5.60	2	(34)	-113113	1	2971
	K.DYDTTPPVVR.W	U	3		581.7938	1161.5730	1161.5666	5.47	0	42	139728	1	3023
	R.HQQTITIPAR.S	U	2		388.8899	1163.6478	1163.6411	5.72	0	(33)	-109786	1	3056
	R.HQQTITIPAR.S	U	3		582.8313	1163.6480	1163.6411	5.97	0	62	206265	1	3058
	R->.<-QVLLNGVQPSR.A	U	3	Gln->pyro-Glu (N-term Q)	597.3398	1192.6650	1192.6564	7.19	0	(47)	-156362	1	3426
	R.VSIRPAPETVK.K	U	2		598.8541	1195.6936	1195.6925	0.93	0	49	163016	1	3462
	R.VSIRPAPETVK.K	U	2		399.5735	1195.6986	1195.6925	5.10	0	(13)	-43249	1	3465
	K.NRWEEPNQK.L	U	2		600.7935	1199.5724	1199.5683	3.39	1	42	139728	1	3490
	K.NRWEEPNQK.L	U	1		400.8648	1199.5727	1199.5683	3.66	1	(22)	-73190.7	1	3491
	R.YISKYEMNR.D	U	1		602.2961	1202.5777	1202.5753	1.98	1	32	106459	1	3551
	R.QVLLNGVQPSR.A	U	5		605.8528	1209.6910	1209.6830	6.65	0	58	192957	1	3636
	K.EVTLEDRLDK.A	U	1		406.5529	1216.6369	1216.6299	5.77	1	5	16634.2	2	3700
	K.AGDFLENHYR.E	U	2		611.2886	1220.5626	1220.5574	4.23	0	54	179650	1	3711
	K.AGDFLENHYR.E	U	3		407.8619	1220.5638	1220.5574	5.24	0	(39)	-129747	1	3714
	R.YYTYMIMNK.G	U	2		613.7880	1225.5614	1225.5511	8.36	0	38	126420	1	3735
	R.YYTYMI->M<-NK.G	U	1	Oxidation (M)	621.7841	1241.5536	1241.5460	6.07	0	(21)	-69863.8	1	3909
	K.RQESLELIRK.G	U	2		424.5885	1270.7436	1270.7357	6.21	2	45	149708	1	4272
	R.KDYDTTPPVVR.W	U	2		645.8408	1289.6670	1289.6616	4.18	1	58	192957	1	4466
	R.KDYDTTPPVVR.W	U	1		430.8966	1289.6679	1289.6616	4.91	1	(42)	-139728	1	4467
	K.ACEPGVDYVYK.T	U	1		650.8032	1299.5918	1299.5805	8.64	0	32	106459	1	4576
	R.VPINDGNGEAILK.R	U	4		670.3680	1338.7214	1338.7143	5.30	0	76	252841	1	4992
	K.FYYIDDPDGLK.V	U	5		673.3244	1344.6342	1344.6238	7.79	0	58	192957	1	5036
	R.EVVADSVWVDVK.D	U	29		673.3585	1344.7024	1344.6926	7.30	0	70	232879	1	5069
	K.DICEAQVNSLGR.S	U	2		681.3309	1360.6473	1360.6405	5.00	0	61	202938	1	5253
	K.SGSDEVQVKQER.K	U	1		454.5626	1360.6660	1360.6583	5.71	1	(50)	-166342	1	5255
	K.SGSDEVQVKQER.K	U	1		681.3411	1360.6677	1360.6583	6.94	1	54	179650	1	5256
	K.RQVLLNGVQPSR.A	U	1		456.2710	1365.7913	1365.7841	5.26	1	9	29941.6	1	5295
	K.TIYTPGSTVLYR.V	U	2		685.8731	1369.7317	1369.7242	5.48	0	60	199611	1	5303
	R.SSVAVPYVIVPLK.I	U	2		686.4207	1370.8269	1370.8173	6.97	0	31	103132	1	5309
	K.AAVYNHFISDGVK.K	U	2		474.2482	1419.7227	1419.7147	5.65	0	(48)	-159689	1	5857
	K.AAVYNHFISDGVK.K	U	3		710.8690	1419.7234	1419.7147	6.13	0	92	306070	1	5858
	K.VSHTVEDCLSFK.V	U	1		474.5645	1420.6716	1420.6657	4.18	0	(41)	-136401	1	5868
	K.VSHTVEDCLSFK.V	U	2		711.3434	1420.6723	1420.6657	4.68	0	72	239533	1	5870
	K.EKNRWEEPNQK.L	U	1		486.5781	1456.7126	1456.7058	4.61	2	9	29941.6	1	6258
	R.NYAGVFTDAGLTLK.T	U	8		735.3895	1468.7644	1468.7562	5.58	0	64	212918	1	6390
	R.QQHSRDGALELAR.S	U	1		494.2612	1479.7618	1479.7542	5.11	1	16	53229.6	1	6519
	R.VPINDGNGEAILKR.Q	U	3		748.4194	1494.8243	1494.8154	5.95	1	92	306070	1	6663
	R.VPINDGNGEAILKR.Q	U	7		499.2830	1494.8271	1494.8154	7.85	1	(92)	-306070	1	6665
	R.TLNPEHLGQGGVQR.E	U	2		753.3989	1504.7832	1504.7746	5.67	0	59	196284	1	6783
	R.TLNPEHLGQGGVQR.E	U	2		502.6021	1504.7843	1504.7746	6.43	0	(32)	-106459	1	6784
	R.DSNKNTLIIYLDK.V	U	1		512.9494	1535.8264	1535.8195	4.48	1	(24)	-79844.4	1	6980
	R.DSNKNTLIIYLDK.V	U	2		768.9205	1535.8265	1535.8195	4.57	1	72	239533	1	6981
	R.FYHPDKEDGMLSK.L	U	2		522.9166	1565.7279	1565.7184	6.03	1	(37)	-123093	1	7294
	R.FYHPDKEDGMLSK.L	U	1		783.8714	1565.7282	1565.7184	6.28	1	42	139728	1	7295
	R.SEETKENERFTVK.A	U	1		532.9368	1595.7887	1595.7791	6.00	2	12	39922.2	1	7625
	R.AILYNYREAENLK.V	U	2		798.9267	1595.8388	1595.8307	5.11	1	35	116440	1	7631
	R.AILYNYREAENLK.V	U	2		532.9539	1595.8399	1595.8307	5.79	1	(11)	-36595.3	1	7632
	K.AFLDCCEYITQLR.Q	U	2		844.8962	1687.7778	1687.7698	4.74	0	109	362627	1	8382
	K.VYSYYNLDETCIR.F	U	3		848.3935	1694.7724	1694.7610	6.74	0	84	279455	1	8426
	K.VYSYYNLDETCIR.F	U	2		565.9315	1694.7726	1694.7610	6.82	0	(27)	-89824.9	1	8427
	R.LPYSVVRNEQVEIR.A	U	1		567.9850	1700.9331	1700.9209	7.17	1	6	19961.1	1	8493
	K.DSITTWEILAVSLSDK.K	U	1		889.4739	1776.9332	1776.9145	10.5	0	21	69863.8	1	8942
	R.VELLYNPAFCSLATAK.K	U	2		898.9712	1795.9278	1795.9178	5.57	0	20	66537	1	9046
	R.SDLDDDIIPEEDIISR.S	U	4		615.6329	1843.8770	1843.8687	4.48	0	(54)	-179650	1	9249
	R.SDLDDDIIPEEDIISR.S	U	14		922.9473	1843.8801	1843.8687	6.19	0	83	276128	1	9260
	K.DSITTWEILAVSLSDKK.G	U	1		636.0164	1905.0273	1905.0095	9.32	1	61	202938	1	9701
	K.EYVLPSFEVQLEPEEK.F	U	2		645.9941	1934.9606	1934.9513	4.81	0	(39)	-129747	1	9949
	K.EYVLPSFEVQLEPEEK.F	U	8		968.4877	1934.9609	1934.9513	4.97	0	71	236206	1	9950
	K.IWDVVEKADIGCTPGSGR.N	U	1		653.9942	1958.9608	1958.9520	4.46	1	45	149708	1	10129
	K.LEDDFDEYIMVIENIIK.S	U	1		1050.0154	2098.0162	2098.0180	-0.85	0	2	6653.7	1	10913
	K.LEDDFDEYIMVIENIIK.S	U	1		700.3528	2098.0365	2098.0180	8.83	0	(1)	-3326.85	1	10914
	K.AYYEDSPQQVFSAEFEVK.E	U	4		713.0010	2135.9813	2135.9688	5.87	0	(27)	-89824.9	1	11118
	K.AYYEDSPQQVFSAEFEVK.E	U	8		1068.9985	2135.9825	2135.9688	6.45	0	80	266148	1	11121
	K.ILLQGTPVAQMTEDAIDGER.L	U	4		719.7028	2156.0865	2156.0783	3.77	0	(82)	-272802	1	11219
	K.ILLQGTPVAQMTEDAIDGER.L	U	5		1079.0507	2156.0868	2156.0783	3.92	0	115	382588	1	11220
	R.EEVPAADLSDQVPDTESETK.I	U	4		1080.5008	2158.9871	2158.9754	5.46	0	104	345992	1	11235
	R.EEVPAADLSDQVPDTESETK.I	U	3		720.6700	2158.9883	2158.9754	5.99	0	(40)	-133074	1	11236
	K.ILLQGTPVAQ->M<-TEDAIDGER.L	U	4	Oxidation (M)	725.0362	2172.0867	2172.0732	6.22	0	(58)	-192957	1	11296
	K.ILLQGTPVAQ->M<-TEDAIDGER.L	U	2	Oxidation (M)	1087.0510	2172.0875	2172.0732	6.57	0	(49)	-163016	1	11298
	R.HIPVVTQGSNVQSLTQDDGVAK.L	U	7		765.0683	2292.1831	2292.1710	5.26	0	(71)	-236206	1	12003
	R.HIPVVTQGSNVQSLTQDDGVAK.L	U	2		1147.1003	2292.1861	2292.1710	6.59	0	89	296090	1	12010
	K.ILLQGTPVAQMTEDAIDGERLK.H	U	1		800.0994	2397.2763	2397.2573	7.90	1	(2)	-6653.7	1	12458
	K.ILLQGTPVAQ->M<-TEDAIDGERLK.H	U	2	Oxidation (M)	805.4298	2413.2674	2413.2523	6.28	1	10	33268.5	1	12505
	R.CAEENCFMHHTEKEVTLEDR.L	U	1		634.5258	2534.0742	2534.0624	4.64	1	2	6653.7	1	12930
	K.QKPDGIFQEDGPVIHQEMIGGFR.D	U	1		650.3291	2597.2873	2597.2697	6.79	0	5	16634.2	1	13175
	K.QKPDGIFQEDGPVIHQE->M<-IGGFR.D	U	1	Oxidation (M)	872.1009	2613.2808	2613.2646	6.22	0	(1)	-3326.85	1	13243
	K.QKPDGIFQEDGPVIHQE->M<-IGGFR.D	U	1	Oxidation (M)	654.3276	2613.2812	2613.2646	6.36	0	(4)	-13307.4	1	13244
	R.DGALELARSDLDDDIIPEEDIISR.S	U	1		1335.6631	2669.3116	2669.3031	3.18	1	(24)	-79844.4	1	13449
	R.DGALELARSDLDDDIIPEEDIISR.S	U	1		668.3356	2669.3132	2669.3031	3.76	1	(13)	-43249	1	13450
	R.DGALELARSDLDDDIIPEEDIISR.S	U	1		890.7792	2669.3159	2669.3031	4.78	1	59	196284	1	13451
	K.EYVLPSFEVQLEPEEKFYYIDDPDGLK.V	U	1		1088.2087	3261.6044	3261.5645	12.2	1	2	6653.7	1	14721
	R.TLNPEHLGQGGVQREEVPAADLSDQVPDTESETK.I	U	2		730.1580	3645.7534	3645.7394	3.83	1	(4)	-13307.4	1	15289
	R.TLNPEHLGQGGVQREEVPAADLSDQVPDTESETK.I	U	3		912.4477	3645.7617	3645.7394	6.09	1	(25)	-83171.2	1	15294
	R.TLNPEHLGQGGVQREEVPAADLSDQVPDTESETK.I	U	2		1216.2615	3645.7626	3645.7394	6.35	1	36	119767	1	15295
P02769	Serum albumin OS=Bos taurus GN=ALB PE=1 SV=4	71244	5106	307(191)	59(50)	32.55	74%	P02769_uniprot		0.00430913	14.3358	-0.429	5.82
	Peptide	Unique	Matches	Modification	Observed	Mr(expt)	Mr(calc)	ppm	Miss	Score	#VALUE!	Rank	Query
	K.GACLLPK.I		5		379.7165	757.4184	757.4156	3.69	0	36	119767	1	167
	K.LVTDLTK.V		5		395.2417	788.4689	788.4644	5.75	0	42	139728	1	283
	R.LSQKFPK.A		4		424.2565	846.4985	846.4963	2.58	1	38	126420	1	772
	R.LCVLHEK.T		3		449.7463	897.4781	897.4742	4.36	0	33	109786	1	1001
	K.AEFVEVTK.L		3		461.7509	921.4872	921.4807	7.04	0	33	109786	1	1150
	K.YLYEIAR.R		5		464.2525	926.4904	926.4861	4.66	0	36	119767	1	1155
	K.DLGEEHFK.G		2		487.7348	973.4550	973.4505	4.61	0	26	86498.1	1	1455
	K->.<-QTALVELLK.H		2	Gln->pyro-Glu (N-term Q)	499.3034	996.5923	996.5855	6.81	0	58	192957	1	1638
	K.LVVSTQTALA.-		10		501.7981	1001.5816	1001.5757	5.86	0	21	69863.8	1	1673
	K.QTALVELLK.H		5		507.8170	1013.6194	1013.6121	7.25	0	(57)	-189630	1	1746
	K.SHCIAEVEK.D		1		358.1759	1071.5059	1071.5019	3.73	0	(28)	-93151.8	1	2192
	K.SHCIAEVEK.D		1		536.7610	1071.5074	1071.5019	5.18	0	36	119767	1	2193
	K.YLYEIARR.H		2		542.3038	1082.5930	1082.5872	5.32	1	15	49902.7	1	2252
	K.EACFAVEGPK.L		4		554.2638	1106.5130	1106.5066	5.77	0	55	182977	1	2461
	K.CCTESLVNR.R		4		569.7554	1137.4962	1137.4907	4.84	0	51	169669	1	2816
	K.KQTALVELLK.H		4		381.5783	1141.7129	1141.7070	5.16	1	(39)	-129747	1	2878
	K.KQTALVELLK.H		4		571.8646	1141.7147	1141.7070	6.71	1	71	236206	1	2883
	K.LVNELTEFAK.T		5		582.3223	1162.6301	1162.6234	5.80	0	71	236206	1	3035
	R.DTHKSEIAHR.F	U	4		597.3064	1192.5982	1192.5949	2.84	1	(41)	-136401	1	3412
	R.DTHKSEIAHR.F	U	5		398.5404	1192.5995	1192.5949	3.88	1	49	163016	1	3413
	R.FKDLGEEHFK.G		5		625.3178	1248.6209	1248.6139	5.66	1	53	176323	1	3978
	R.FKDLGEEHFK.G		6		417.2143	1248.6210	1248.6139	5.67	1	(49)	-163016	1	3979
	K.ECCDKPLLEK.S		1		431.2069	1290.5988	1290.5948	3.12	0	(15)	-49902.7	1	4479
	K.ECCDKPLLEK.S		1		646.3069	1290.5992	1290.5948	3.42	0	28	93151.8	1	4480
	K.FPKAEFVEVTK.L		1		647.8593	1293.7041	1293.6969	5.55	1	22	73190.7	1	4523
	K.FPKAEFVEVTK.L		2		432.2421	1293.7045	1293.6969	5.87	1	(20)	-66537	1	4524
	K.HLVDEPQNLIK.Q		3		435.9121	1304.7143	1304.7088	4.21	0	(43)	-143055	1	4672
	K.HLVDEPQNLIK.Q		8		653.3651	1304.7155	1304.7088	5.15	0	73	242860	1	4677
	K.TVMENFVAFVDK.C	U	1		467.2378	1398.6916	1398.6853	4.49	0	(20)	-66537	1	5622
	K.TVMENFVAFVDK.C	U	2		700.3538	1398.6931	1398.6853	5.53	0	(62)	-206265	1	5623
	K.TV->M<-ENFVAFVDK.C	U	15	Oxidation (M)	708.3523	1414.6900	1414.6803	6.90	0	85	282782	1	5786
	K.SLHTLFGDELCK.V		5		710.3544	1418.6943	1418.6864	5.57	0	56	186304	1	5826
	K.SLHTLFGDELCK.V		7		473.9063	1418.6970	1418.6864	7.48	0	(38)	-126420	1	5838
	K.YICDNQDTISSK.L		8		722.3270	1442.6394	1442.6347	3.21	0	92	306070	1	6096
	K.TCVADESHAGCEK.S		1		488.5371	1462.5894	1462.5817	5.29	0	(44)	-146381	1	6315
	K.TCVADESHAGCEK.S		1		732.3024	1462.5903	1462.5817	5.90	0	50	166342	1	6316
	R.ETYGDMADCCEK.Q	U	2		739.7694	1477.5241	1477.5160	5.54	0	46	153035	1	6491
	K.LGEYGFQNALIVR.Y	U	2		493.9386	1478.7940	1478.7881	3.94	0	(41)	-136401	1	6509
	K.LGEYGFQNALIVR.Y	U	5		740.4044	1478.7943	1478.7881	4.15	0	98	326031	1	6510
	K.EYEATLEECCAK.D		3		751.8152	1501.6159	1501.6065	6.32	0	47	156362	1	6742
	K.VPQVSTPTLVEVSR.S		3		756.4292	1510.8438	1510.8355	5.51	0	79	262821	1	6812
	K.VPQVSTPTLVEVSR.S		2		504.6224	1510.8454	1510.8355	6.54	0	(49)	-163016	1	6813
	K.LKECCDKPLLEK.S		3		766.8973	1531.7800	1531.7738	4.05	1	63	209592	1	6944
	K.LKECCDKPLLEK.S		3		511.6011	1531.7815	1531.7738	5.01	1	(55)	-182977	1	6945
	K.LKECCDKPLLEK.S		2		383.9531	1531.7834	1531.7738	6.28	1	(10)	-33268.5	2	6947
	R.LCVLHEKTPVSEK.V		2		770.4175	1538.8205	1538.8127	5.12	1	82	272802	1	7030
	R.LCVLHEKTPVSEK.V		1		385.7124	1538.8206	1538.8127	5.17	1	(38)	-126420	1	7031
	R.LCVLHEKTPVSEK.V		2		513.9476	1538.8211	1538.8127	5.46	1	(45)	-149708	1	7032
	K.LKHLVDEPQNLIK.Q		3		773.9542	1545.8939	1545.8878	3.91	1	46	153035	1	7107
	K.LKHLVDEPQNLIK.Q		2		516.3055	1545.8946	1545.8878	4.38	1	(36)	-119767	1	7110
	K.DDPHACYSTVFDK.L	U	3		777.8341	1553.6535	1553.6457	5.07	0	51	169669	1	7184
	K.DDPHACYSTVFDK.L	U	1		518.8925	1553.6556	1553.6457	6.36	0	(16)	-53229.6	1	7187
	K.DAFLGSFLYEYSR.R		4		784.3799	1566.7452	1566.7354	6.23	0	72	239533	1	7307
	K.DAFLGSFLYEYSR.R		1		523.2561	1566.7465	1566.7354	7.04	0	(28)	-93151.8	1	7309
	K.LKPDPNTLCDEFK.A		4		788.8925	1575.7704	1575.7603	6.40	0	64	212918	1	7400
	K.LKPDPNTLCDEFK.A		5		526.2646	1575.7721	1575.7603	7.51	0	(43)	-143055	1	7405
	R.KVPQVSTPTLVEVSR.S		3		547.3212	1638.9419	1638.9305	6.94	1	(59)	-196284	1	8049
	R.KVPQVSTPTLVEVSR.S		4		820.4784	1638.9423	1638.9305	7.24	1	80	266148	1	8050
	K.AEFVEVTKLVTDLTK.V		1		846.9810	1691.9474	1691.9346	7.57	1	1	3326.85	1	8418
	R.MPCTEDYLSLILNR.L	U	1		862.9267	1723.8388	1723.8273	6.70	0	(70)	-232879	1	8658
	R.->M<-PCTEDYLSLILNR.L	U	1	Oxidation (M)	580.9515	1739.8326	1739.8222	5.97	0	(21)	-69863.8	1	8735
	R.->M<-PCTEDYLSLILNR.L	U	1	Oxidation (M)	870.9238	1739.8331	1739.8222	6.26	0	87	289436	1	8736
	K.YNGVFQECCQAEDK.G		6		874.3612	1746.7079	1746.6978	5.78	0	83	276128	1	8769
	K.ECCHGDLLECADDR.A		1		875.3378	1748.6611	1748.6553	3.35	0	(5)	-16634.2	1	8785
	K.ECCHGDLLECADDR.A		2		583.8965	1748.6676	1748.6553	7.06	0	23	76517.5	1	8787
	K.DDPHACYSTVFDKLK.H	U	1		898.4241	1794.8336	1794.8247	4.96	1	(1)	-3326.85	1	9031
	K.DDPHACYSTVFDKLK.H	U	1		599.2861	1794.8366	1794.8247	6.61	1	32	106459	1	9033
	R.LAKEYEATLEECCAK.D		1		907.9229	1813.8311	1813.8226	4.72	1	64	212918	1	9122
	R.LAKEYEATLEECCAK.D		1		605.6182	1813.8327	1813.8226	5.55	1	(14)	-46575.9	1	9123
	R.RPCFSALTPDETYVPK.A		4		940.9696	1879.9246	1879.9138	5.75	0	35	116440	1	9546
	R.RPCFSALTPDETYVPK.A		4		627.6498	1879.9275	1879.9138	7.28	0	(29)	-96478.6	1	9549
	R.NECFLSHKDDSPDLPK.L		1		951.4459	1900.8772	1900.8625	7.71	1	(21)	-69863.8	1	9676
	R.NECFLSHKDDSPDLPK.L		1		476.2266	1900.8773	1900.8625	7.75	1	(29)	-96478.6	1	9677
	R.NECFLSHKDDSPDLPK.L		3		634.6333	1900.8781	1900.8625	8.18	1	52	172996	1	9678
	K.CCAADDKEACFAVEGPK.L		4		643.2742	1926.8009	1926.7910	5.11	1	(53)	-176323	1	9895
	K.CCAADDKEACFAVEGPK.L		3		964.4079	1926.8012	1926.7910	5.31	1	99	329358	1	9896
	K.DAIPENLPPLTADFAEDK.D		3		978.4896	1954.9647	1954.9524	6.31	0	66	219572	1	10110
	K.DAIPENLPPLTADFAEDK.D		2		652.6625	1954.9656	1954.9524	6.78	0	(44)	-146381	1	10111
	K.LKPDPNTLCDEFKADEK.K		6		673.9988	2018.9745	2018.9619	6.25	1	89	296090	1	10532
	K.LKPDPNTLCDEFKADEK.K		5		505.7511	2018.9754	2018.9619	6.70	1	(33)	-109786	1	10535
	K.LKPDPNTLCDEFKADEK.K		5		1010.4950	2018.9754	2018.9619	6.72	1	(74)	-246187	1	10536
	K.VHKECCHGDLLECADDR.A		1		705.3022	2112.8847	2112.8775	3.40	1	(21)	-69863.8	1	10991
	K.VHKECCHGDLLECADDR.A		2		529.2293	2112.8881	2112.8775	5.01	1	29	96478.6	1	10993
	K.LKPDPNTLCDEFKADEKK.F		1		1074.5404	2147.0663	2147.0568	4.39	2	(3)	-9980.55	1	11184
	K.LKPDPNTLCDEFKADEKK.F		2		537.7747	2147.0695	2147.0568	5.91	2	(21)	-69863.8	1	11190
	K.LKPDPNTLCDEFKADEKK.F		4		716.6974	2147.0703	2147.0568	6.29	2	71	236206	1	11191
	K.ECCHGDLLECADDRADLAK.Y		1		1124.4812	2246.9478	2246.9354	5.52	1	(3)	-9980.55	1	11635
	K.ECCHGDLLECADDRADLAK.Y		1		749.9901	2246.9485	2246.9354	5.81	1	34	113113	1	11636
	K.ECCHGDLLECADDRADLAK.Y		1		562.7448	2246.9501	2246.9354	6.54	1	(17)	-56556.4	1	11637
	K.HLVDEPQNLIKQNCDQFEK.L		1		785.7205	2354.1396	2354.1325	3.01	1	12	39922.2	1	12288
	K.DAIPENLPPLTADFAEDKDVCK.N		1		1229.5986	2457.1827	2457.1733	3.81	1	(19)	-63210.1	1	12630
	K.DAIPENLPPLTADFAEDKDVCK.N		3		820.0704	2457.1895	2457.1733	6.56	1	78	259494	1	12639
	K.YNGVFQECCQAEDKGACLLPK.I		2		829.7138	2486.1194	2486.1028	6.67	1	26	86498.1	1	12754
	K.GLVLIAFSQYLQQCPFDEHVK.L		1		831.4359	2491.2859	2491.2570	11.6	0	21	69863.8	1	12775
	K.QEPERNECFLSHKDDSPDLPK.L		2		509.0416	2540.1714	2540.1601	4.44	2	(24)	-79844.4	1	12975
	K.QEPERNECFLSHKDDSPDLPK.L		3		636.0510	2540.1750	2540.1601	5.86	2	(16)	-53229.6	1	12978
	K.QEPERNECFLSHKDDSPDLPK.L		2		847.7326	2540.1760	2540.1601	6.23	2	30	99805.5	1	12980
	K.VHKECCHGDLLECADDRADLAK.Y		2		871.4000	2611.1781	2611.1577	7.78	2	14	46575.9	1	13234
	K.VHKECCHGDLLECADDRADLAK.Y		3		523.2430	2611.1785	2611.1577	7.96	2	(10)	-33268.5	1	13235
	K.VHKECCHGDLLECADDRADLAK.Y		1		653.8029	2611.1823	2611.1577	9.42	2	(7)	-23287.9	1	13237
	K.SHCIAEVEKDAIPENLPPLTADFAEDK.D		1		1003.8273	3008.4602	3008.4437	5.48	1	7	23287.9	1	14326
	K.EYEATLEECCAKDDPHACYSTVFDK.L	U	1		760.3212	3037.2558	3037.2416	4.69	1	(4)	-13307.4	1	14388
	K.EYEATLEECCAKDDPHACYSTVFDK.L	U	1		1013.4265	3037.2577	3037.2416	5.31	1	30	99805.5	1	14390
	K.DAIPENLPPLTADFAEDKDVCKNYQEAK.D		2		798.6384	3190.5244	3190.5128	3.62	2	10	33268.5	1	14617
	K.DAIPENLPPLTADFAEDKDVCKNYQEAK.D		2		1064.5160	3190.5261	3190.5128	4.18	2	(1)	-3326.85	1	14618
	K.SHCIAEVEKDAIPENLPPLTADFAEDKDVCK.N		1		1171.2360	3510.6861	3510.6647	6.09	2	(3)	-9980.55	1	15046
	K.SHCIAEVEKDAIPENLPPLTADFAEDKDVCK.N		1		878.6796	3510.6892	3510.6647	6.98	2	36	119767	1	15047
	K.SHCIAEVEKDAIPENLPPLTADFAEDKDVCK.N		1		703.1452	3510.6896	3510.6647	7.11	2	(6)	-19961.1	1	15048
B0JYQ0	ALB protein OS=Bos taurus GN=ALB PE=2 SV=1	71244	4265	263(165)	54(43)	19.44	65%	B0JYQ0_uniprot		0.00369154	12.2812	-0.432	5.95
	Peptide	Unique	Matches	Modification	Observed	Mr(expt)	Mr(calc)	ppm	Miss	Score	#VALUE!	Rank	Query
	K.VLTSSAR.Q	U	1		367.2155	732.4164	732.4130	4.66	0	9	29941.6	1	81
	K.GACLLPK.I		5		379.7165	757.4184	757.4156	3.69	0	36	119767	1	167
	K.LVTDLTK.V		5		395.2417	788.4689	788.4644	5.75	0	42	139728	1	283
	R.LSQKFPK.A		4		424.2565	846.4985	846.4963	2.58	1	38	126420	1	772
	R.LCVLHEK.T		3		449.7463	897.4781	897.4742	4.36	0	33	109786	1	1001
	K.AEFVEVTK.L		3		461.7509	921.4872	921.4807	7.04	0	33	109786	1	1150
	K.YLYEIAR.R		5		464.2525	926.4904	926.4861	4.66	0	36	119767	1	1155
	K.DLGEEHFK.G		2		487.7348	973.4550	973.4505	4.61	0	26	86498.1	1	1455
	R.EKVLTSSAR.Q	U	1		495.7846	989.5545	989.5505	4.05	1	24	79844.4	1	1582
	K->.<-QTALVELLK.H		2	Gln->pyro-Glu (N-term Q)	499.3034	996.5923	996.5855	6.81	0	58	192957	1	1638
	K.LVVSTQTALA.-		10		501.7981	1001.5816	1001.5757	5.86	0	21	69863.8	1	1673
	K.QTALVELLK.H		5		507.8170	1013.6194	1013.6121	7.25	0	(57)	-189630	1	1746
	K.SHCIAEVEK.D		1		358.1759	1071.5059	1071.5019	3.73	0	(28)	-93151.8	1	2192
	K.SHCIAEVEK.D		1		536.7610	1071.5074	1071.5019	5.18	0	36	119767	1	2193
	K.YLYEIARR.H		2		542.3038	1082.5930	1082.5872	5.32	1	15	49902.7	1	2252
	K.EACFAVEGPK.L		4		554.2638	1106.5130	1106.5066	5.77	0	55	182977	1	2461
	K.CCTESLVNR.R		4		569.7554	1137.4962	1137.4907	4.84	0	51	169669	1	2816
	K.KQTALVELLK.H		4		381.5783	1141.7129	1141.7070	5.16	1	(39)	-129747	1	2878
	K.KQTALVELLK.H		4		571.8646	1141.7147	1141.7070	6.71	1	71	236206	1	2883
	K.LVNELTEFAK.T		5		582.3223	1162.6301	1162.6234	5.80	0	71	236206	1	3035
	R.FKDLGEEHFK.G		5		625.3178	1248.6209	1248.6139	5.66	1	53	176323	1	3978
	R.FKDLGEEHFK.G		6		417.2143	1248.6210	1248.6139	5.67	1	(49)	-163016	1	3979
	K.ECCDKPLLEK.S		1		431.2069	1290.5988	1290.5948	3.12	0	(15)	-49902.7	1	4479
	K.ECCDKPLLEK.S		1		646.3069	1290.5992	1290.5948	3.42	0	28	93151.8	1	4480
	K.FPKAEFVEVTK.L		1		647.8593	1293.7041	1293.6969	5.55	1	22	73190.7	1	4523
	K.FPKAEFVEVTK.L		2		432.2421	1293.7045	1293.6969	5.87	1	(20)	-66537	1	4524
	K.HLVDEPQNLIK.Q		3		435.9121	1304.7143	1304.7088	4.21	0	(43)	-143055	1	4672
	K.HLVDEPQNLIK.Q		8		653.3651	1304.7155	1304.7088	5.15	0	73	242860	1	4677
	K.SLHTLFGDELCK.V		5		710.3544	1418.6943	1418.6864	5.57	0	56	186304	1	5826
	K.SLHTLFGDELCK.V		7		473.9063	1418.6970	1418.6864	7.48	0	(38)	-126420	1	5838
	K.YICDNQDTISSK.L		8		722.3270	1442.6394	1442.6347	3.21	0	92	306070	1	6096
	K.TCVADESHAGCEK.S		1		488.5371	1462.5894	1462.5817	5.29	0	(44)	-146381	1	6315
	K.TCVADESHAGCEK.S		1		732.3024	1462.5903	1462.5817	5.90	0	50	166342	1	6316
	K.EYEATLEECCAK.D		3		751.8152	1501.6159	1501.6065	6.32	0	47	156362	1	6742
	K.VPQVSTPTLVEVSR.S		3		756.4292	1510.8438	1510.8355	5.51	0	79	262821	1	6812
	K.VPQVSTPTLVEVSR.S		2		504.6224	1510.8454	1510.8355	6.54	0	(49)	-163016	1	6813
	K.LKECCDKPLLEK.S		3		766.8973	1531.7800	1531.7738	4.05	1	63	209592	1	6944
	K.LKECCDKPLLEK.S		3		511.6011	1531.7815	1531.7738	5.01	1	(55)	-182977	1	6945
	K.LKECCDKPLLEK.S		2		383.9531	383.9531	1531.7834	6.28	1	(10)	-33268.5	2	6947
	K.LGEYGFQNELIVR.Y	U	1		769.4084	1536.8022	1536.7936	5.60	0	39	129747	1	7002
	R.LCVLHEKTPVSEK.V		2		770.4175	1538.8205	1538.8127	5.12	1	82	272802	1	7030
	R.LCVLHEKTPVSEK.V		1		385.7124	1538.8206	1538.8127	5.17	1	(38)	-126420	1	7031
	R.LCVLHEKTPVSEK.V		2		513.9476	1538.8211	1538.8127	5.46	1	(45)	-149708	1	7032
	K.LKHLVDEPQNLIK.Q		3		773.9542	1545.8939	1545.8878	3.91	1	46	153035	1	7107
	K.LKHLVDEPQNLIK.Q		2		516.3055	1545.8946	1545.8878	4.38	1	(36)	-119767	1	7110
	K.DAFLGSFLYEYSR.R		4		784.3799	1566.7452	1566.7354	6.23	0	72	239533	1	7307
	K.DAFLGSFLYEYSR.R		1		523.2561	1566.7465	1566.7354	7.04	0	(28)	-93151.8	1	7309
	K.LKPDPNTLCDEFK.A		4		788.8925	1575.7704	1575.7603	6.40	0	64	212918	1	7400
	K.LKPDPNTLCDEFK.A		5		526.2646	1575.7721	1575.7603	7.51	0	(43)	-143055	1	7405
	R.KVPQVSTPTLVEVSR.S		3		547.3212	1638.9419	1638.9305	6.94	1	(59)	-196284	1	8049
	R.KVPQVSTPTLVEVSR.S		4		820.4784	1638.9423	1638.9305	7.24	1	80	266148	1	8050
	K.AEFVEVTKLVTDLTK.V		1		846.9810	1691.9474	1691.9346	7.57	1	1	3326.85	1	8418
	K.YNGVFQECCQAEDK.G		6		874.3612	1746.7079	1746.6978	5.78	0	83	276128	1	8769
	K.ECCHGDLLECADDR.A		1		875.3378	1748.6611	1748.6553	3.35	0	(5)	-16634.2	1	8785
	K.ECCHGDLLECADDR.A		2		583.8965	1748.6676	1748.6553	7.06	0	23	76517.5	1	8787
	R.LAKEYEATLEECCAK.D		1		907.9229	1813.8311	1813.8226	4.72	1	64	212918	1	9122
	R.LAKEYEATLEECCAK.D		1		605.6182	1813.8327	1813.8226	5.55	1	(14)	-46575.9	1	9123
	R.RPCFSALTPDETYVPK.A		4		940.9696	1879.9246	1879.9138	5.75	0	35	116440	1	9546
	R.RPCFSALTPDETYVPK.A		4		627.6498	1879.9275	1879.9138	7.28	0	(29)	-96478.6	1	9549
	R.NECFLSHKDDSPDLPK.L		1		951.4459	1900.8772	1900.8625	7.71	1	(21)	-69863.8	1	9676
	R.NECFLSHKDDSPDLPK.L		1		476.2266	1900.8773	1900.8625	7.75	1	(29)	-96478.6	1	9677
	R.NECFLSHKDDSPDLPK.L		3		634.6333	1900.8781	1900.8625	8.18	1	52	172996	1	9678
	K.CCAADDKEACFAVEGPK.L		4		643.2742	1926.8009	1926.7910	5.11	1	(53)	-176323	1	9895
	K.CCAADDKEACFAVEGPK.L		3		964.4079	1926.8012	1926.7910	5.31	1	99	329358	1	9896
	K.DAIPENLPPLTADFAEDK.D		3		978.4896	1954.9647	1954.9524	6.31	0	66	219572	1	10110
	K.DAIPENLPPLTADFAEDK.D		2		652.6625	1954.9656	1954.9524	6.78	0	(44)	-146381	1	10111
	K.LKPDPNTLCDEFKADEK.K		6		673.9988	2018.9745	2018.9619	6.25	1	89	296090	1	10532
	K.LKPDPNTLCDEFKADEK.K		5		505.7511	2018.9754	2018.9619	6.70	1	(33)	-109786	1	10535
	K.LKPDPNTLCDEFKADEK.K		5		1010.4950	2018.9754	2018.9619	6.72	1	(74)	-246187	1	10536
	K.VHKECCHGDLLECADDR.A		1		705.3022	2112.8847	2112.8775	3.40	1	(21)	-69863.8	1	10991
	K.VHKECCHGDLLECADDR.A		2		529.2293	2112.8881	2112.8775	5.01	1	29	96478.6	1	10993
	K.LKPDPNTLCDEFKADEKK.F		1		1074.5404	2147.0663	2147.0568	4.39	2	(3)	-9980.55	1	11184
	K.LKPDPNTLCDEFKADEKK.F		2		537.7747	2147.0695	2147.0568	5.91	2	(21)	-69863.8	1	11190
	K.LKPDPNTLCDEFKADEKK.F		4		716.6974	2147.0703	2147.0568	6.29	2	71	236206	1	11191
	K.ECCHGDLLECADDRADLAK.Y		1		1124.4812	2246.9478	2246.9354	5.52	1	(3)	-9980.55	1	11635
	K.ECCHGDLLECADDRADLAK.Y		1		749.9901	2246.9485	2246.9354	5.81	1	34	113113	1	11636
	K.ECCHGDLLECADDRADLAK.Y		1		562.7448	2246.9501	2246.9354	6.54	1	(17)	-56556.4	1	11637
	K.HLVDEPQNLIKQNCDQFEK.L		1		785.7205	2354.1396	2354.1325	3.01	1	12	39922.2	1	12288
	K.DAIPENLPPLTADFAEDKDVCK.N		1		1229.5986	2457.1827	2457.1733	3.81	1	(19)	-63210.1	1	12630
	K.DAIPENLPPLTADFAEDKDVCK.N		3		820.0704	2457.1895	2457.1733	6.56	1	78	259494	1	12639
	K.YNGVFQECCQAEDKGACLLPK.I		2		829.7138	2486.1194	2486.1028	6.67	1	26	86498.1	1	12754
	K.GLVLIAFSQYLQQCPFDEHVK.L		1		831.4359	2491.2859	2491.2570	11.6	0	21	69863.8	1	12775
	K.QEPERNECFLSHKDDSPDLPK.L		2		509.0416	2540.1714	2540.1601	4.44	2	(24)	-79844.4	1	12975
	K.QEPERNECFLSHKDDSPDLPK.L		3		636.0510	2540.1750	2540.1601	5.86	2	(16)	-53229.6	1	12978
	K.QEPERNECFLSHKDDSPDLPK.L		2		847.7326	2540.1760	2540.1601	6.23	2	30	99805.5	1	12980
	K.VHKECCHGDLLECADDRADLAK.Y		2		871.4000	2611.1781	2611.1577	7.78	2	14	46575.9	1	13234
	K.VHKECCHGDLLECADDRADLAK.Y		3		523.2430	2611.1785	2611.1577	7.96	2	(10)	-33268.5	1	13235
	K.VHKECCHGDLLECADDRADLAK.Y		1		653.8029	2611.1823	2611.1577	9.42	2	(7)	-23287.9	1	13237
	K.SHCIAEVEKDAIPENLPPLTADFAEDK.D		1		1003.8273	3008.4602	3008.4437	5.48	1	7	23287.9	1	14326
	K.DAIPENLPPLTADFAEDKDVCKNYQEAK.D		2		798.6384	3190.5244	3190.5128	3.62	2	10	33268.5	1	14617
	K.DAIPENLPPLTADFAEDKDVCKNYQEAK.D		2		1064.5160	3190.5261	3190.5128	4.18	2	(1)	-3326.85	1	14618
	K.SHCIAEVEKDAIPENLPPLTADFAEDKDVCK.N		1		1171.2360	3510.6861	3510.6647	6.09	2	(3)	-9980.55	1	15046
	K.SHCIAEVEKDAIPENLPPLTADFAEDKDVCK.N		1		878.6796	3510.6892	3510.6647	6.98	2	36	119767	1	15047
	K.SHCIAEVEKDAIPENLPPLTADFAEDKDVCK.N		1		703.1452	3510.6896	3510.6647	7.11	2	(6)	-19961.1	1	15048
	Peptide	Unique	Matches	Modification	Observed	Mr(expt)	Mr(calc)	ppm	Miss	Score	#VALUE!	Rank	Query
	K.INVEVR.G		1		365.2179	728.4212	728.4181	4.35	0	57	189630	1	69
	K.ILQVER.E		2		379.2341	756.4536	756.4494	5.65	0	43	143055	1	157
	R.LQLEPGK.E		1		392.7339	783.4533	783.4490	5.43	0	11	36595.3	1	243
	R.AVDLIQK.G		2		393.7421	785.4696	785.4647	6.23	0	40	133074	1	260
	R.ANTFLGAK.A		2		411.2321	820.4497	820.4443	6.58	0	55	182977	1	547
	R.GQIVSVHR.E	U	1		448.2603	894.5061	894.5036	2.81	0	28	93151.8	1	989
	K.FACYSPR.V		2		450.7072	899.3999	899.3960	4.34	0	40	133074	1	1008
	R.VDYGFQVK.V		3		478.2507	954.4868	954.4811	5.97	0	37	123093	1	1320
	R.TRGQVGLAR.A		1		479.2859	956.5572	956.5516	5.93	1	32	106459	1	1337
	R.ICFLHLR.R	U	1		479.7713	957.5280	957.5218	6.49	0	43	143055	1	1352
	R.RVENSISR.A	U	1		480.7672	959.5199	959.5148	5.33	1	35	116440	1	1363
	K.LNLKTESR.A		1		480.7790	959.5434	959.5400	3.55	1	45	149708	1	1365
	R->.<-QGSFQGGFR.S		2	Gln->pyro-Glu (N-term Q)	483.7274	965.4403	965.4356	4.96	0	(13)	-43249	1	1400
	R.EFHMHLR.L	U	3		485.2430	968.4715	968.4650	6.64	0	28	93151.8	1	1429
	R.IGVPLSVAVK.L	U	2		491.8202	981.6258	981.6223	3.56	0	53	176323	1	1518
	R.QGSFQGGFR.S		2		492.2415	982.4684	982.4621	6.38	0	46	153035	1	1523
	K.LELNVDSSK.A		2		502.7691	1003.5237	1003.5186	5.12	0	59	196284	1	1683
	K.AYRPGDTVK.L		2		503.7726	1005.5306	1005.5243	6.24	0	17	56556.4	1	1687
	K.AEFQGVLEK.L		2		510.7747	1019.5349	1019.5287	6.08	0	42	139728	1	1796
	K.VDFSLSSDR.D		3		513.2511	1024.4876	1024.4825	4.98	0	51	169669	1	1836
	K.SHKPLDMVK.V		1		527.7908	1053.5671	1053.5641	2.87	0	(18)	-59883.3	1	2058
	K.SHKPLDMVK.V		2		352.1971	1053.5695	1053.5641	5.14	0	22	73190.7	1	2059
	K.CSVFYGAPR.K		7		528.7535	1055.4924	1055.4859	6.21	0	45	149708	1	2082
	K.DRAVDLIQK.G		1		529.3070	1056.5993	1056.5927	6.25	1	12	39922.2	1	2095
	K.LGQYTSPVAK.R		2		532.2950	1062.5755	1062.5710	4.31	0	63	209592	1	2149
	R.FGLLGEDGEK.T		5		532.7704	1063.5263	1063.5186	7.30	0	70	232879	1	2154
	R.GQQDLEGYR.M		3		533.2529	1064.4912	1064.4887	2.36	0	50	166342	1	2166
	R.ITQVLHFTK.D		3		362.8835	1085.6286	1085.6233	4.86	0	(29)	-96478.6	1	2282
	R.ITQVLHFTK.D		2		543.8219	1085.6292	1085.6233	5.44	0	50	166342	1	2285
	K.YVLPNFEVK.I		3		554.8077	1107.6009	1107.5964	4.06	0	50	166342	1	2483
	R.LLLFSPSVVR.I		4		565.8536	1129.6926	1129.6859	5.91	0	58	192957	1	2742
	R.YRVFALDQK.M		3		380.5471	1138.6194	1138.6135	5.16	1	(31)	-103132	1	2832
	R.YRVFALDQK.M		3		570.3182	1138.6218	1138.6135	7.31	1	43	143055	1	2835
	K.TTGLCVATPAR.L		3		573.8041	1145.5936	1145.5863	6.38	0	59	196284	1	2901
	R.DGSYGAWLHR.D		3		581.2786	1160.5427	1160.5363	5.52	0	60	199611	1	3007
	K.LQDAPSGQVVR.G	U	3		585.3201	1168.6257	1168.6200	4.85	0	42	139728	1	3166
	R.VAHNNLMA->M<-AK.D		1	Oxidation (M)	405.8726	1214.5959	1214.5900	4.85	0	4	13307.4	1	3692
	K.AAGLAFSDGDHR.T		2		406.1976	1215.5709	1215.5632	6.28	0	(49)	-163016	1	3698
	K.AAGLAFSDGDHR.T		1		608.7928	1215.5710	1215.5632	6.40	0	74	246187	1	3699
	K.KYVLPNFEVK.I		2		618.8554	1235.6963	1235.6914	3.95	1	44	146381	1	3859
	R.DMSGSPASSIPVK.V	U	3		638.3185	1274.6224	1274.6176	3.74	0	62	206265	1	4299
	R.GQIVSVHREPR.S	U	2		639.3593	1276.7041	1276.7000	3.18	1	23	76517.5	1	4346
	R.GQIVSVHREPR.S	U	2		426.5757	1276.7053	1276.7000	4.14	1	(16)	-53229.6	1	4349
	R.D->M<-SGSPASSIPVK.V	U	5	Oxidation (M)	646.3171	1290.6197	1290.6126	5.55	0	(34)	-113113	1	4486
	K.LNISTDDLPGLR.L		1		657.3613	1312.7081	1312.6987	7.19	0	64	212918	1	4784
	K.RDGSYGAWLHR.D		1		659.3214	1316.6283	1316.6374	-6.94	1	0	0	1	4841
	R.GQQDLEGYRMK.F		1		662.8252	1323.6358	1323.6241	8.86	1	(1)	-3326.85	2	4921
	R.GSFDFPVGDAISK.I		3		670.3331	1338.6517	1338.6456	4.56	0	51	169669	1	4988
	R.GQQDLEGYR->M<-K.F		1	Oxidation (M)	670.8192	1339.6239	1339.6190	3.61	1	15	49902.7	1	4996
	R.ADLEKLTSLSDR.Y		1		449.9122	1346.7147	1346.7041	7.83	1	23	76517.5	1	5113
	R.SFFPENWLWK.V		1		677.3350	1352.6554	1352.6554	0.01	0	10	33268.5	1	5182
	K.VEEVDRFSQLR.L		3		689.3631	1376.7116	1376.7048	4.96	1	43	143055	1	5330
	K.VEEVDRFSQLR.L		3		459.9116	1376.7129	1376.7048	5.90	1	(22)	-73190.7	1	5333
	R.NPSHVNELCSPK.V		2		691.3307	1380.6469	1380.6456	0.99	0	65	216245	1	5369
	R.NPSHVNELCSPK.V		1		461.2239	1380.6500	1380.6456	3.19	0	(39)	-129747	1	5372
	K.LVDGQCQISLQK.A		5		694.8671	1387.7196	1387.7130	4.78	0	80	266148	1	5484
	K.AELADQAASWLTR.Q		3		716.3685	1430.7225	1430.7154	4.99	0	96	319378	1	5965
	K.ILSLAQDQVGGSAEK.L	U	2		758.4088	1514.8029	1514.7940	5.89	0	78	259494	1	6828
	K->.<-QTDMQGVNLLFSSR.R		2	Gln->pyro-Glu (N-term Q)	789.8882	1577.7619	1577.7508	7.05	0	(14)	-46575.9	1	7426
	R.FGLLGEDGEKTFLR.G		6		791.4208	1580.8271	1580.8199	4.60	1	(74)	-246187	1	7442
	R.FGLLGEDGEKTFLR.G		5		527.9499	1580.8278	1580.8199	5.05	1	74	246187	1	7444
	K.QTDMQGVNLLFSSR.R		3		798.4016	1594.7887	1594.7773	7.10	0	(79)	-262821	1	7615
	K.QTDMQGVNLLFSSR.R		2		532.6036	1594.7891	1594.7773	7.37	0	(37)	-123093	1	7616
	K.QTD->M<-QGVNLLFSSR.R		4	Oxidation (M)	806.3973	1610.7800	1610.7723	4.81	0	95	316051	1	7745
	R.DDGPFHDPCPVIHR.E		3		554.5905	1660.7497	1660.7417	4.86	0	33	109786	1	8190
	R.DDGPFHDPCPVIHR.E		1		416.1954	1660.7526	1660.7417	6.60	0	(11)	-36595.3	1	8193
	R.DDGPFHDPCPVIHR.E		2		831.3845	1660.7545	1660.7417	7.73	0	(4)	-13307.4	1	8196
	R.ALVALGAVDTALYAVGGK.S		1		844.9906	1687.9666	1687.9509	9.35	0	38	126420	1	8387
	K.EYLIMGLDGATYDLK.G		2		851.4288	1700.8431	1700.8331	5.88	0	76	252841	1	8487
	K.AAGLAFSDGDHRTEIR.K		2		858.4313	1714.8481	1714.8387	5.51	1	(30)	-99805.5	1	8584
	K.AAGLAFSDGDHRTEIR.K		3		572.6237	1714.8493	1714.8387	6.21	1	45	149708	1	8587
	K.EYLI->M<-GLDGATYDLK.G		2	Oxidation (M)	859.4265	1716.8385	1716.8280	6.09	0	(33)	-109786	1	8614
	R.EEMVYELNPLDPLGR.T		1		887.9443	1773.8741	1773.8607	7.57	0	42	139728	1	8927
	K.AAGLAFSDGDHRTEIRK.S		1		922.4769	1842.9393	1842.9336	3.08	2	(1)	-3326.85	1	9237
	K.AAGLAFSDGDHRTEIRK.S		4		615.3220	1842.9442	1842.9336	5.75	2	27	89824.9	1	9240
	K.LLSTLCSADVCQCAEGK.C		3		956.4387	1910.8629	1910.8536	4.85	0	87	289436	1	9745
	R.YLDKTEQWSMLPPETK.D		3		655.9974	1964.9705	1964.9553	7.71	1	22	73190.7	1	10197
	R.TLEIPGNSDPNIIPEGDFK.S		1		686.0160	2055.0263	2055.0160	5.00	0	(15)	-49902.7	1	10763
	R.TLEIPGNSDPNIIPEGDFK.S		4		1028.5212	2055.0279	2055.0160	5.79	0	47	156362	1	10765
	R.RGHLFLQTDQPVYNPGQR.V	U	1		709.3731	2125.0975	2125.0817	7.42	1	2	6653.7	1	11059
	R.AMELLQEEDLIEEDDIPVR.S		1		565.0305	2256.0930	2256.0831	4.38	0	(20)	-66537	1	11721
	R.AMELLQEEDLIEEDDIPVR.S		3		1129.0542	2256.0938	2256.0831	4.76	0	135	449125	1	11722
	R.AMELLQEEDLIEEDDIPVR.S		2		753.0391	2256.0954	2256.0831	5.43	0	(65)	-216245	1	11724
	R.A->M<-ELLQEEDLIEEDDIPVR.S		2	Oxidation (M)	758.3710	2272.0913	2272.0780	5.83	0	(33)	-109786	1	11829
	R.A->M<-ELLQEEDLIEEDDIPVR.S		7	Oxidation (M)	1137.0535	2272.0924	2272.0780	6.32	0	(92)	-306070	1	11830
	K.GDPQYLLDSNSWIEEMPSER.M		2		789.3599	2365.0578	2365.0532	1.92	0	(26)	-86498.1	1	12329
	K.GDPQYLLDSNSWIEEMPSER.M		1		1183.5397	2365.0648	2365.0532	4.90	0	95	316051	1	12330
	K.GDPQYLLDSNSWIEE->M<-PSER.M		2	Oxidation (M)	1191.5380	2381.0614	2381.0481	5.56	0	(22)	-73190.7	1	12392
	K.GDPQYLLDSNSWIEE->M<-PSER.M		2	Oxidation (M)	794.6951	2381.0634	2381.0481	6.41	0	(46)	-153035	1	12397
	R.EGALHREEMVYELNPLDPLGR.T		1		813.4154	2437.2244	2437.2059	7.57	1	27	89824.9	1	12577
	R.EGALHREE->M<-VYELNPLDPLGR.T		1	Oxidation (M)	818.7500	2453.2282	2453.2009	11.1	1	(2)	-6653.7	1	12617
Q7SIH1	Alpha-2-macroglobulin OS=Bos taurus GN=A2M PE=1 SV=2	168953	3107	212(140)	52(48)	2.34	33%	Q7SIH1_uniprot		0.00125479	4.17449	-0.19	5.71
	Peptide	Unique	Matches	Modification	Observed	Mr(expt)	Mr(calc)	ppm	Miss	Score	#VALUE!	Rank	Query
	R.GIPFTGK.V		3		360.2096	718.4046	718.4014	4.52	0	29	96478.6	1	29
	K.GTSLSIR.V		1		367.2157	732.4169	732.4130	5.34	0	24	79844.4	1	82
	K.VLLVDGK.G		2		372.2384	742.4622	742.4589	4.52	0	41	136401	1	93
	K.YNILPK.K		4		374.2256	746.4366	746.4326	5.25	0	31	103132	1	108
	R.GEAFTLK.A		3		383.2125	764.4104	764.4068	4.69	0	36	119767	1	204
	K.FEVQVR.M		2		389.2185	776.4225	776.4181	5.64	0	38	126420	1	239
	K.RTTVLVK.N		1		408.7700	815.5254	815.5229	3.11	1	11	36595.3	1	526
	K.AGALCLSR.D		2		424.2294	846.4442	846.4382	7.13	0	61	202938	1	768
	K.VSESLSLK.L	U	2		431.7497	861.4848	861.4807	4.69	0	46	153035	1	828
	R.DLKPAIVK.V		3		442.2868	882.5590	882.5538	5.84	0	37	123093	1	977
	R.VTMNMCR.K		1		456.2003	910.3861	910.3823	4.15	0	37	123093	1	1096
	K.RQEFEMK.I		1		484.2391	966.4637	966.4593	4.61	1	28	93151.8	1	1415
	K.IKGTSLSIR.V		1		487.8054	973.5963	973.5920	4.39	1	29	96478.6	1	1461
	K.FQVENSNR.L		1		497.2424	992.4703	992.4675	2.78	0	33	109786	1	1601
	K.ATVLNYLPK.C		4		509.8020	1017.5894	1017.5859	3.47	0	38	126420	1	1775
	R.YGAATFTSAR.K		4		522.7622	1043.5097	1043.5036	5.89	0	66	219572	1	1944
	R->.<-QTVSWAVTPK.S		2	Gln->pyro-Glu (N-term Q)	550.2967	1098.5788	1098.5710	7.14	0	(39)	-129747	1	2400
	R.SLFTDVVAEK.D		3		554.8014	1107.5882	1107.5812	6.35	0	64	212918	1	2479
	R.QTVSWAVTPK.S		7		558.8084	1115.6021	1115.5975	4.15	0	64	212918	1	2578
	R.STGTLLNNAIK.G	U	3		566.3259	1130.6373	1130.6295	6.89	0	49	163016	1	2754
	K.GATEITTTITK.L		3		568.3166	1134.6187	1134.6132	4.87	0	55	182977	1	2780
	K.LPPNVVEESAR.A	U	6		605.8290	1209.6434	1209.6353	6.68	0	71	236206	1	3628
	R.LLTEDIYQPR.A	U	2		416.5616	1246.6631	1246.6557	5.93	0	(17)	-56556.4	1	3954
	R.LLTEDIYQPR.A	U	3		624.3400	1246.6655	1246.6557	7.84	0	82	272802	1	3958
	K.LSFVTVDSNLR.R		3		625.8439	1249.6732	1249.6667	5.23	0	54	179650	1	4003
	R.YEIEHCLANK.V	U	2		638.8069	1275.5992	1275.5917	5.86	0	64	212918	1	4310
	R.YEIEHCLANK.V	U	2		426.2077	1275.6013	1275.5917	7.48	0	(30)	-99805.5	1	4312
	R.DTGLGLSPTASLR.V		5		644.3527	1286.6908	1286.6830	6.01	0	57	189630	1	4425
	K.TQTVQAHYVLK.G		2		644.3602	1286.7059	1286.6983	5.92	0	42	139728	1	4431
	R.VTASPQSLCALR.A		1		651.8486	1301.6827	1301.6762	5.03	0	64	212918	1	4609
	R.NALFCLDSAWK.S		3		662.8254	1323.6363	1323.6281	6.18	0	56	186304	1	4922
	R.IQHHTLLASPVR.A		1		457.9360	1370.7863	1370.7783	5.86	0	25	83171.2	1	5307
	K.LSFVTVDSNLRR.G		1		703.8945	1405.7745	1405.7678	4.80	1	(8)	-26614.8	1	5695
	K.LSFVTVDSNLRR.G		2		469.5991	1405.7754	1405.7678	5.40	1	23	76517.5	1	5696
	R.SNSFVYLEPLPR.E		2		474.5874	1420.7403	1420.7350	3.69	0	(47)	-156362	1	5882
	R.SNSFVYLEPLPR.E		4		711.3775	1420.7404	1420.7350	3.80	0	58	192957	1	5883
	K.IQEEGTEVELTGK.G		4		716.8659	1431.7173	1431.7093	5.57	0	73	242860	1	5971
	R.TEVLTSLYEEAVK.E		2		741.3942	1480.7738	1480.7661	5.21	0	73	242860	1	6529
	R.ASFSVLGDILGSAMR.N	U	1		762.4054	1522.7962	1522.7814	9.78	0	18	59883.3	1	6888
	K.HFDGSYSTFGEHR.G	U	4		513.8934	1538.6583	1538.6539	2.87	0	39	129747	1	7008
	R.GNSEGNTWLTAFVLK.S	U	1		818.9268	1635.8390	1635.8257	8.13	0	83	276128	1	8004
	R.RTEVLTSLYEEAVK.E		2		819.4455	1636.8764	1636.8672	5.67	1	80	266148	1	8023
	R.RTEVLTSLYEEAVK.E		2		546.6332	1636.8779	1636.8672	6.55	1	(53)	-176323	1	8024
	R.TEVSNNHVLIYLDK.V		2		548.9600	1643.8582	1643.8519	3.87	0	(28)	-93151.8	1	8087
	R.TEVSNNHVLIYLDK.V		2		822.9378	1643.8611	1643.8519	5.60	0	67	222899	1	8088
	K.DTIIKPLLVEPEGLEK.E	U	3		897.5205	1793.0265	1793.0186	4.40	0	64	212918	1	9020
	K.DTIIKPLLVEPEGLEK.E	U	3		598.6832	1793.0279	1793.0186	5.17	0	(39)	-129747	1	9023
	R.NPSNCYGEESNAVCEK.F		1		929.3768	1856.7390	1856.7305	4.57	0	40	133074	1	9368
	R.LLIYAILPDGEVVGDSAR.Y		2		634.3556	1900.0451	1900.0306	7.66	0	(48)	-159689	1	9669
	R.LLIYAILPDGEVVGDSAR.Y		3		951.0309	1900.0473	1900.0306	8.82	0	57	189630	1	9671
	R.KDTIIKPLLVEPEGLEK.E	U	1		481.2878	1921.1219	1921.1135	4.35	1	(18)	-59883.3	1	9795
	R.KDTIIKPLLVEPEGLEK.E	U	2		641.3815	1921.1226	1921.1135	4.71	1	55	182977	1	9796
	R.KDTIIKPLLVEPEGLEK.E	U	1		961.5699	1921.1253	1921.1135	6.15	1	(24)	-79844.4	1	9797
	R.DFVHFDDTSEPPTETVR.K		4		996.4598	1990.9050	1990.8909	7.09	0	58	192957	1	10341
	R.DFVHFDDTSEPPTETVR.K		5		664.6424	1990.9054	1990.8909	7.28	0	(36)	-119767	1	10343
	K.GSGGTAEHPFTVEEFVLPK.F		3		1001.5057	2000.9969	2000.9844	6.27	0	52	172996	1	10413
	K.GSGGTAEHPFTVEEFVLPK.F		3		668.0070	2000.9991	2000.9844	7.33	0	(39)	-129747	1	10417
	K.VSESLSLKLPPNVVEESAR.A	U	7		1027.5646	2053.1146	2053.1055	4.44	1	31	103132	1	10748
	R.DFVHFDDTSEPPTETVRK.Y		3		707.3412	2119.0017	2118.9858	7.50	1	(13)	-43249	1	11030
	R.DFVHFDDTSEPPTETVRK.Y		1		530.7577	2119.0019	2118.9858	7.58	1	25	83171.2	1	11031
	K.YRNPSNCYGEESNAVCEK.F		1		726.3081	2175.9025	2175.8949	3.48	1	34	113113	1	11319
	R.NRDFVHFDDTSEPPTETVR.K		2		1131.5303	2261.0460	2261.0349	4.90	1	(36)	-119767	1	11755
	R.NRDFVHFDDTSEPPTETVR.K		7		754.6903	2261.0491	2261.0349	6.28	1	87	289436	1	11762
	R.NRDFVHFDDTSEPPTETVR.K		2		566.2700	2261.0510	2261.0349	7.10	1	(27)	-89824.9	1	11766
	R.HFPPAAATDTAADAHDPARPGAK.V	U	16		572.0354	2284.1125	2284.0985	6.14	0	56	186304	1	11939
	R.HFPPAAATDTAADAHDPARPGAK.V	U	7		762.3783	2284.1131	2284.0985	6.39	0	(54)	-179650	1	11942
	R.NRDFVHFDDTSEPPTETVRK.Y		6		797.3879	2389.1420	2389.1299	5.07	2	63	209592	1	12430
	R.NRDFVHFDDTSEPPTETVRK.Y		8		598.2935	2389.1450	2389.1299	6.32	2	(26)	-86498.1	1	12434
	K.KDEFPFALEVQTLPQTCDGPK.A		3		807.4037	2419.1894	2419.1730	6.80	1	39	129747	1	12531
	K.NEESLVFVQTDKPIYKPEQTVK.F		3		648.8478	2591.3623	2591.3483	5.40	0	(21)	-69863.8	1	13155
	K.NEESLVFVQTDKPIYKPEQTVK.F		3		864.7952	2591.3637	2591.3483	5.95	0	39	129747	1	13157
G3X6N3	Serotransferrin OS=Bos taurus GN=TF PE=3 SV=1	79783	2926	156(104)	48(42)	10.20	59%	G3X6N3_uniprot		0.0019553	6.505	-0.451	7.13
	Peptide	Unique	Matches	Modification	Observed	Mr(expt)	Mr(calc)	ppm	Miss	Score	#VALUE!	Rank	Query
	K.GDVAFVK.D		2		368.2075	734.4004	734.3963	5.54	0	29	96478.6	1	90
	K.CLASIAK.K		2		381.7144	761.4142	761.4105	4.77	0	32	106459	1	184
	K.DSADGFLK.I		3		426.7101	851.4056	851.4025	3.66	0	38	126420	1	816
	R.GPNHAVVSR.K		1		468.7564	935.4981	935.4937	4.74	0	5	16634.2	1	1216
	K.LCQLCAGK.G		1		475.2365	948.4585	948.4521	6.77	0	32	106459	1	1296
	K.TSHMDCIK.A		1		496.2237	990.4328	990.4263	6.61	0	19	63210.1	1	1587
	K.ENFEVLCK.D		3		519.7532	1037.4918	1037.4852	6.38	0	31	103132	1	1926
	R.SAGWNIPMGK.L	U	4		530.7692	1059.5238	1059.5171	6.28	0	59	196284	1	2112
	R.SAGWNIP->M<-GK.L	U	2	Oxidation (M)	538.7664	1075.5182	1075.5121	5.68	0	(3)	-9980.55	1	2206
	R.YYGYTGAFR.C		2		549.2584	1096.5022	1096.4978	4.00	0	41	136401	1	2383
	K.DLLFRDDTK.C		2		374.8657	1121.5754	1121.5717	3.33	1	(9)	-29941.6	1	2647
	K.DLLFRDDTK.C		4		561.7960	1121.5775	1121.5717	5.17	1	43	143055	1	2650
	K.WCAIGHQER.T		1		386.1844	1155.5314	1155.5244	6.13	0	33	109786	1	2949
	K.WCAIGHQER.T		1		578.7731	1155.5317	1155.5244	6.37	0	(25)	-83171.2	1	2950
	K.KENFEVLCK.D		1		583.7998	1165.5850	1165.5801	4.22	1	7	23287.9	1	3070
	K.LLEACTFHKP.-		3		405.8802	1214.6187	1214.6118	5.67	0	28	93151.8	1	3695
	K.DTDFKLNELR.G		3		625.8262	1249.6379	1249.6302	6.13	1	61	202938	1	3993
	K.DTDFKLNELR.G		3		417.5534	1249.6384	1249.6302	6.52	1	(30)	-99805.5	1	3994
	K.DSADGFLKIPSK.M		1		639.3434	1276.6722	1276.6663	4.62	1	51	169669	1	4340
	K.DSADGFLKIPSK.M		2		426.5651	1276.6734	1276.6663	5.59	1	(18)	-59883.3	1	4342
	K.ILNKQQDDFGK.S		1		653.3472	1304.6798	1304.6725	5.62	1	85	282782	1	4670
	K.ILNKQQDDFGK.S		2		435.9006	1304.6800	1304.6725	5.76	1	(59)	-196284	1	4671
	K.ELPDPQESIQR.A		1		437.8919	1310.6540	1310.6466	5.62	0	(8)	-26614.8	1	4757
	K.ELPDPQESIQR.A		4		656.3346	1310.6546	1310.6466	6.11	0	60	199611	1	4760
	R.ILESGPFVSCVK.K		4		668.3558	1334.6970	1334.6904	4.91	0	83	276128	1	4970
	R.WCTISTHEANK.C		2		449.5456	1345.6149	1345.6085	4.81	0	(29)	-96478.6	1	5095
	R.WCTISTHEANK.C		2		673.8154	1345.6162	1345.6085	5.73	0	41	136401	1	5097
	K.NYELLCGDNTR.K		2		677.8122	1353.6098	1353.5983	8.52	0	54	179650	1	5187
	K.CGLVPVLAENYK.T		4		681.8622	1361.7099	1361.7013	6.33	0	76	252841	1	5272
	R.CLVEKGDVAFVK.D		1		455.5825	1363.7256	1363.7170	6.29	1	44	146381	1	5290
	K.KDTDFKLNELR.G		2		689.8731	1377.7315	1377.7252	4.60	2	84	279455	1	5345
	K.TSDANINWNNLK.G		3		695.3460	1388.6773	1388.6684	6.44	0	62	206265	1	5493
	K.CLMEGAGDVAFVK.H		3		698.8388	1395.6629	1395.6527	7.37	0	(56)	-186304	1	5604
	K.CL->M<-EGAGDVAFVK.H		3	Oxidation (M)	706.8337	1411.6528	1411.6476	3.70	0	74	246187	1	5751
	K.GTGKECVPNSNER.Y		1		724.3373	1446.6600	1446.6521	5.45	1	(14)	-46575.9	1	6134
	K.GTGKECVPNSNER.Y		1		483.2274	1446.6603	1446.6521	5.68	1	28	93151.8	1	6135
	K.TYDSYLGDDYVR.A		5		733.8297	1465.6447	1465.6361	5.87	0	87	289436	1	6345
	K.ENFEVLCKDGTR.K		1		734.3541	1466.6936	1466.6824	7.63	1	17	56556.4	1	6356
	K.DLLFKDSADGFLK.I		2		490.2639	1467.7699	1467.7609	6.13	1	40	133074	1	6383
	K.DLLFKDSADGFLK.I		1		734.8923	1467.7700	1467.7609	6.16	1	(35)	-116440	1	6384
	K.NYELLCGDNTRK.S		1		494.9079	1481.7018	1481.6933	5.76	1	(27)	-89824.9	1	6533
	K.NYELLCGDNTRK.S		1		741.8585	1481.7025	1481.6933	6.23	1	32	106459	1	6534
	R.KNYELLCGDNTR.K		2		741.8585	1481.7025	1481.6933	6.23	1	(53)	-176323	1	6535
	R.KNYELLCGDNTR.K		2		494.9084	1481.7033	1481.6933	6.75	1	54	179650	1	6537
	K.NTPEKGYLAVAVVK.T		2		744.9296	1487.8447	1487.8348	6.68	1	(30)	-99805.5	1	6583
	K.NTPEKGYLAVAVVK.T		2		496.9556	1487.8451	1487.8348	6.92	1	42	139728	1	6584
	R.KPVTDAENCHLAR.G		1		378.4432	1509.7439	1509.7358	5.34	0	(68)	-226226	1	6808
	R.KPVTDAENCHLAR.G		1		755.8795	1509.7444	1509.7358	5.68	0	(55)	-182977	1	6809
	R.KPVTDAENCHLAR.G		1		504.2559	1509.7458	1509.7358	6.66	0	71	236206	1	6810
	K.NLKKENFEVLCK.D		1		507.9448	1520.8126	1520.8021	6.95	2	28	93151.8	1	6862
	K.KTYDSYLGDDYVR.A		2		797.8774	1593.7402	1593.7311	5.72	1	90	299416	1	7598
	K.KTYDSYLGDDYVR.A		2		532.2549	1593.7428	1593.7311	7.35	1	(48)	-159689	1	7601
	K.DNPQTHYYAVAVVK.K		2		802.9109	1603.8073	1603.7995	4.92	0	54	179650	1	7700
	K.HSTVFDNLPNPEDR.K		4		820.8915	1639.7684	1639.7590	5.71	0	103	342665	1	8056
	K.HSTVFDNLPNPEDR.K		5		547.5969	1639.7689	1639.7590	6.03	0	(63)	-209592	1	8058
	K.FDEFFSAGCAPGSPR.N		2		822.8658	1643.7171	1643.7039	8.07	0	59	196284	1	8080
	K.LYKELPDPQESIQR.A		5		858.4566	1714.8986	1714.8890	5.65	1	(48)	-159689	1	8594
	K.LYKELPDPQESIQR.A		4		572.6415	1714.9026	1714.8890	7.96	1	65	216245	1	8597
	R.ESKPPDSSKDECMVK.W		1		579.6027	1735.7863	1735.7757	6.15	1	(19)	-63210.1	1	8724
	R.ESKPPDSSKDECMVK.W		1		434.9544	1735.7884	1735.7757	7.35	1	21	69863.8	1	8725
	K.DKPDNFQLFQSPHGK.D		2		879.4383	1756.8620	1756.8533	4.98	0	81	269475	1	8821
	K.DKPDNFQLFQSPHGK.D		3		586.6281	1756.8623	1756.8533	5.14	0	(41)	-136401	1	8822
	K.HSTVFDNLPNPEDRK.N		3		884.9384	1767.8621	1767.8540	4.61	1	74	246187	1	8885
	K.HSTVFDNLPNPEDRK.N		4		590.2955	1767.8648	1767.8540	6.09	1	(47)	-156362	1	8888
	K.GEADAMSLDGGYLYIAGK.C		2		915.9363	1829.8580	1829.8505	4.08	0	67	222899	1	9191
	K.DGTRKPVTDAENCHLAR.G		1		485.7420	1938.9389	1938.9330	3.04	1	82	272802	1	9985
	K.DGTRKPVTDAENCHLAR.G		1		647.3210	1938.9411	1938.9330	4.18	1	(66)	-219572	1	9986
	K.SVTDCTSNFCLFQSNSK.D		1		997.9377	1993.8608	1993.8510	4.92	0	56	186304	1	10372
	K.DQTVIQNTDGNNNEAWAK.N		3		1009.4698	2016.9250	2016.9137	5.62	0	81	269475	1	10506
	K.DQTVIQNTDGNNNEAWAK.N		2		673.3157	2016.9254	2016.9137	5.78	0	(36)	-119767	1	10507
	K.CGLVPVLAENYKTEDGSCK.N	U	2		714.0089	2139.0049	2138.9976	3.40	1	10	33268.5	1	11145
	K.GDVAFVKDQTVIQNTDGNNNEAWAK.N		3		912.1133	2733.3182	2733.2994	6.86	1	89	296090	1	13770
Q29443	Serotransferrin OS=Bos taurus GN=TF PE=2 SV=1	79870	2874	152(103)	48(43)	10.63	58%	Q29443_uniprot		0.00190309	6.3313	-0.452	6.75
	Peptide	Unique	Matches	Modification	Observed	Mr(expt)	Mr(calc)	ppm	Miss	Score	#VALUE!	Rank	Query
	K.GDVAFVK.D		2		368.2075	734.4004	734.3963	5.54	0	29	96478.6	1	90
	K.CLASIAK.K		2		381.7144	761.4142	761.4105	4.77	0	32	106459	1	184
	K.DSADGFLK.I		3		426.7101	851.4056	851.4025	3.66	0	38	126420	1	816
	R.GPNHAVVSR.K		1		468.7564	935.4981	935.4937	4.74	0	5	16634.2	1	1216
	K.LCQLCAGK.G		1		475.2365	948.4585	948.4521	6.77	0	32	106459	1	1296
	K.TSHMDCIK.A		1		496.2237	990.4328	990.4263	6.61	0	19	63210.1	1	1587
	K.ENFEVLCK.D		3		519.7532	1037.4918	1037.4852	6.38	0	31	103132	1	1926
	R.YYGYTGAFR.C		2		549.2584	1096.5022	1096.4978	4.00	0	41	136401	1	2383
	K.DLLFRDDTK.C		2		374.8657	1121.5754	1121.5717	3.33	1	(9)	-29941.6	1	2647
	K.DLLFRDDTK.C		4		561.7960	1121.5775	1121.5717	5.17	1	43	143055	1	2650
	K.WCAIGHQER.T		1		386.1844	1155.5314	1155.5244	6.13	0	33	109786	1	2949
	K.WCAIGHQER.T		1		578.7731	1155.5317	1155.5244	6.37	0	(25)	-83171.2	1	2950
	K.KENFEVLCK.D		1		583.7998	1165.5850	1165.5801	4.22	1	7	23287.9	1	3070
	K.LLEACTFHKP.-		3		405.8802	1214.6187	1214.6118	5.67	0	28	93151.8	1	3695
	K.DTDFKLNELR.G		3		625.8262	1249.6379	1249.6302	6.13	1	61	202938	1	3993
	K.DTDFKLNELR.G		3		417.5534	1249.6384	1249.6302	6.52	1	(30)	-99805.5	1	3994
	K.DSADGFLKIPSK.M		1		639.3434	1276.6722	1276.6663	4.62	1	51	169669	1	4340
	K.DSADGFLKIPSK.M		2		426.5651	1276.6734	1276.6663	5.59	1	(18)	-59883.3	1	4342
	K.ILNKQQDDFGK.S		1		653.3472	1304.6798	1304.6725	5.62	1	85	282782	1	4670
	K.ILNKQQDDFGK.S		2		435.9006	1304.6800	1304.6725	5.76	1	(59)	-196284	1	4671
	K.ELPDPQESIQR.A		1		437.8919	1310.6540	1310.6466	5.62	0	(8)	-26614.8	1	4757
	K.ELPDPQESIQR.A		4		656.3346	1310.6546	1310.6466	6.11	0	60	199611	1	4760
	R.ILESGPFVSCVK.K		4		668.3558	1334.6970	1334.6904	4.91	0	83	276128	1	4970
	R.WCTISTHEANK.C		2		449.5456	1345.6149	1345.6085	4.81	0	(29)	-96478.6	1	5095
	R.WCTISTHEANK.C		2		673.8154	1345.6162	1345.6085	5.73	0	41	136401	1	5097
	K.NYELLCGDNTR.K		2		677.8122	1353.6098	1353.5983	8.52	0	54	179650	1	5187
	K.CGLVPVLAENYK.T		4		681.8622	1361.7099	1361.7013	6.33	0	76	252841	1	5272
	R.CLVEKGDVAFVK.D		1		455.5825	1363.7256	1363.7170	6.29	1	44	146381	1	5290
	K.KDTDFKLNELR.G		2		689.8731	1377.7315	1377.7252	4.60	2	84	279455	1	5345
	K.TSDANINWNNLK.D		3		695.3460	1388.6773	1388.6684	6.44	0	62	206265	1	5493
	K.CLMEGAGDVAFVK.H		3		698.8388	1395.6629	1395.6527	7.37	0	(56)	-186304	1	5604
	K.CL->M<-EGAGDVAFVK.H		3	Oxidation (M)	706.8337	1411.6528	1411.6476	3.70	0	74	246187	1	5751
	K.GTGKECVPNSNER.Y		1		724.3373	1446.6600	1446.6521	5.45	1	(14)	-46575.9	1	6134
	K.GTGKECVPNSNER.Y		1		483.2274	1446.6603	1446.6521	5.68	1	28	93151.8	1	6135
	K.TYDSYLGDDYVR.A		5		733.8297	1465.6447	1465.6361	5.87	0	87	289436	1	6345
	K.ENFEVLCKDGTR.K		1		734.3541	1466.6936	1466.6824	7.63	1	17	56556.4	1	6356
	K.DLLFKDSADGFLK.I		2		490.2639	1467.7699	1467.7609	6.13	1	40	133074	1	6383
	K.DLLFKDSADGFLK.I		1		734.8923	1467.7700	1467.7609	6.16	1	(35)	-116440	1	6384
	K.NYELLCGDNTRK.S		1		494.9079	1481.7018	1481.6933	5.76	1	(27)	-89824.9	1	6533
	K.NYELLCGDNTRK.S		1		741.8585	1481.7025	1481.6933	6.23	1	32	106459	1	6534
	R.KNYELLCGDNTR.K		2		741.8585	1481.7025	1481.6933	6.23	1	(53)	-176323	1	6535
	R.KNYELLCGDNTR.K		2		494.9084	1481.7033	1481.6933	6.75	1	54	179650	1	6537
	K.NTPEKGYLAVAVVK.T		2		744.9296	1487.8447	1487.8348	6.68	1	(30)	-99805.5	1	6583
	K.NTPEKGYLAVAVVK.T		2		496.9556	1487.8451	1487.8348	6.92	1	42	139728	1	6584
	R.KPVTDAENCHLAR.G		1		378.4432	1509.7439	1509.7358	5.34	0	(68)	-226226	1	6808
	R.KPVTDAENCHLAR.G		1		755.8795	1509.7444	1509.7358	5.68	0	(55)	-182977	1	6809
	R.KPVTDAENCHLAR.G		1		504.2559	1509.7458	1509.7358	6.66	0	71	236206	1	6810
	K.NLKKENFEVLCK.D		1		507.9448	1520.8126	1520.8021	6.95	2	28	93151.8	1	6862
	K.KTYDSYLGDDYVR.A		2		797.8774	1593.7402	1593.7311	5.72	1	90	299416	1	7598
	K.KTYDSYLGDDYVR.A		2		532.2549	1593.7428	1593.7311	7.35	1	(48)	-159689	1	7601
	K.DNPQTHYYAVAVVK.K		2		802.9109	1603.8073	1603.7995	4.92	0	54	179650	1	7700
	K.TSDANINWNNLKDK.K	U	1		816.9056	1631.7966	1631.7903	3.86	1	28	93151.8	1	7961
	K.HSTVFDNLPNPEDR.K		4		820.8915	1639.7684	1639.7590	5.71	0	103	342665	1	8056
	K.HSTVFDNLPNPEDR.K		5		547.5969	1639.7689	1639.7590	6.03	0	(63)	-209592	1	8058
	K.FDEFFSAGCAPGSPR.N		2		822.8658	1643.7171	1643.7039	8.07	0	59	196284	1	8080
	K.LYKELPDPQESIQR.A		5		858.4566	1714.8986	1714.8890	5.65	1	(48)	-159689	1	8594
	K.LYKELPDPQESIQR.A		4		572.6415	1714.9026	1714.8890	7.96	1	65	216245	1	8597
	R.ESKPPDSSKDECMVK.W		1		579.6027	1735.7863	1735.7757	6.15	1	(19)	-63210.1	1	8724
	R.ESKPPDSSKDECMVK.W		1		434.9544	1735.7884	1735.7757	7.35	1	21	69863.8	1	8725
	K.DKPDNFQLFQSPHGK.D		2		879.4383	1756.8620	1756.8533	4.98	0	81	269475	1	8821
	K.DKPDNFQLFQSPHGK.D		3		586.6281	1756.8623	1756.8533	5.14	0	(41)	-136401	1	8822
	K.HSTVFDNLPNPEDRK.N		3		884.9384	1767.8621	1767.8540	4.61	1	74	246187	1	8885
	K.HSTVFDNLPNPEDRK.N		4		590.2955	1767.8648	1767.8540	6.09	1	(47)	-156362	1	8888
	K.GEADAMSLDGGYLYIAGK.C		2		915.9363	1829.8580	1829.8505	4.08	0	67	222899	1	9191
	K.DGTRKPVTDAENCHLAR.G		1		485.7420	1938.9389	1938.9330	3.04	1	82	272802	1	9985
	K.DGTRKPVTDAENCHLAR.G		1		647.3210	1938.9411	1938.9330	4.18	1	(66)	-219572	1	9986
	K.SVTDCTSNFCLFQSNSK.D		1		997.9377	1993.8608	1993.8510	4.92	0	56	186304	1	10372
	K.DQTVIQNTDGNNNEAWAK.N		3		1009.4698	2016.9250	2016.9137	5.62	0	81	269475	1	10506
	K.DQTVIQNTDGNNNEAWAK.N		2		673.3157	2016.9254	2016.9137	5.78	0	(36)	-119767	1	10507
	K.CGLVPVLAENYKTEGESCK.N	U	3		718.6834	2153.0284	2153.0133	7.03	1	39	129747	1	11210
	K.GDVAFVKDQTVIQNTDGNNNEAWAK.N		3		912.1133	2733.3182	2733.2994	6.86	1	89	296090	1	13770
	Peptide	Unique	Matches	Modification	Observed	Mr(expt)	Mr(calc)	ppm	Miss	Score	#VALUE!	Rank	Query
	K.INVEVR.G		1		365.2179	728.4212	728.4181	4.35	0	57	189630	1	69
	K.ILQVER.E		2		379.2341	756.4536	756.4494	5.65	0	43	143055	1	157
	R.TRGQVGLAR.A		1		479.2859	956.5572	956.5516	5.93	1	32	106459	1	1337
	K.LNLKTESR.A		1		480.7790	959.5434	959.5400	3.55	1	45	149708	1	1365
	R->.<-QGSFQGGFR.S		2	Gln->pyro-Glu (N-term Q)	483.7274	965.4403	965.4356	4.96	0	(13)	-43249	1	1400
	R.QGSFQGGFR.S		2		492.2415	982.4684	982.4621	6.38	0	46	153035	1	1523
	K.LELNVDSSK.A		2		502.7691	1003.5237	1003.5186	5.12	0	59	196284	1	1683
	K.AYRPGDTVK.L		2		503.7726	1005.5306	1005.5243	6.24	0	17	56556.4	1	1687
	K.AEFQGVLEK.L		2		510.7747	1019.5349	1019.5287	6.08	0	42	139728	1	1796
	K.VDFSLSSDR.D		3		513.2511	1024.4876	1024.4825	4.98	0	51	169669	1	1836
	K.SHKPLDMVK.V		1		527.7908	1053.5671	1053.5641	2.87	0	(18)	-59883.3	1	2058
	K.SHKPLDMVK.V		2		352.1971	1053.5695	1053.5641	5.14	0	22	73190.7	1	2059
	K.LGQYTSPVAK.R		2		532.2950	1062.5755	1062.5710	4.31	0	63	209592	1	2149
	R.FGLLGEDGEK.T		5		532.7704	1063.5263	1063.5186	7.30	0	70	232879	1	2154
	K.YVLPNFEVK.I		3		554.8077	1107.6009	1107.5964	4.06	0	50	166342	1	2483
	R.LLLFSPSVVR.I		4		565.8536	1129.6926	1129.6859	5.91	0	58	192957	1	2742
	R.YRVFALDQK.M		3		380.5471	1138.6194	1138.6135	5.16	1	(31)	-103132	1	2832
	R.YRVFALDQK.M		3		570.3182	1138.6218	1138.6135	7.31	1	43	143055	1	2835
	K.TTGLCVATPAR.L		3		573.8041	1145.5936	1145.5863	6.38	0	59	196284	1	2901
	R.VAHNNLMA->M<-AK.D		1	Oxidation (M)	405.8726	1214.5959	1214.5900	4.85	0	4	13307.4	1	3692
	K.AAGLAFSDGDHR.T		2		406.1976	1215.5709	1215.5632	6.28	0	(49)	-163016	1	3698
	K.AAGLAFSDGDHR.T		1		608.7928	1215.5710	1215.5632	6.40	0	74	246187	1	3699
	K.KYVLPNFEVK.I		2		618.8554	1235.6963	1235.6914	3.95	1	44	146381	1	3859
	R.DMSGSPASGIPVK.V	U	3		623.3148	1244.6150	1244.6071	6.33	0	70	232879	1	3930
	R.D->M<-SGSPASGIPVK.V	U	9	Oxidation (M)	631.3110	1260.6075	1260.6020	4.38	0	(32)	-106459	1	4132
	K.LNISTDDLPGLR.Y		1		657.3613	1312.7081	1312.6987	7.19	0	64	212918	1	4784
	R.FVSSPFSLDLSK.T	U	3		663.8545	1325.6944	1325.6867	5.81	0	75	249514	1	4934
	R.SFFPENWLWK.V		1		677.3350	1352.6554	1352.6554	0.01	0	10	33268.5	1	5182
	K.VEEVDRFSQLR.L		3		689.3631	1376.7116	1376.7048	4.96	1	43	143055	1	5330
	K.VEEVDRFSQLR.L		3		459.9116	1376.7129	1376.7048	5.90	1	(22)	-73190.7	1	5333
	R.NPSHVNELCSPK.V		2		691.3307	1380.6469	1380.6456	0.99	0	65	216245	1	5369
	R.NPSHVNELCSPK.V		1		461.2239	1380.6500	1380.6456	3.19	0	(39)	-129747	1	5372
	K.LVDGQCQISLQK.A		5		694.8671	1387.7196	1387.7130	4.78	0	80	266148	1	5484
	K.AELADQAASWLTR.Q		3		716.3685	1430.7225	1430.7154	4.99	0	96	319378	1	5965
	K->.<-QTDMQGVNLLFSSR.R		2	Gln->pyro-Glu (N-term Q)	789.8882	1577.7619	1577.7508	7.05	0	(14)	-46575.9	1	7426
	R.FGLLGEDGEKTFLR.G		6		791.4208	1580.8271	1580.8199	4.60	1	(74)	-246187	1	7442
	R.FGLLGEDGEKTFLR.G		5		527.9499	1580.8278	1580.8199	5.05	1	74	246187	1	7444
	K.QTDMQGVNLLFSSR.R		3		798.4016	1594.7887	1594.7773	7.10	0	(79)	-262821	1	7615
	K.QTDMQGVNLLFSSR.R		2		532.6036	1594.7891	1594.7773	7.37	0	(37)	-123093	1	7616
	K.QTD->M<-QGVNLLFSSR.R		4	Oxidation (M)	806.3973	1610.7800	1610.7723	4.81	0	95	316051	1	7745
	R.ALVALGAVDTALYAVGGK.S		1		844.9906	1687.9666	1687.9509	9.35	0	38	126420	1	8387
	K.AAGLAFSDGDHRTEIR.K		2		858.4313	1714.8481	1714.8387	5.51	1	(30)	-99805.5	1	8584
	K.AAGLAFSDGDHRTEIR.K		3		572.6237	1714.8493	1714.8387	6.21	1	45	149708	1	8587
	R.DFILLNVPIPQEQAR.V	U	1		876.9916	1751.9687	1751.9570	6.69	0	57	189630	1	8803
	K.AAGLAFSDGDHRTEIRK.S		1		922.4769	1842.9393	1842.9336	3.08	2	(1)	-3326.85	1	9237
	K.AAGLAFSDGDHRTEIRK.S		4		615.3220	1842.9442	1842.9336	5.75	2	27	89824.9	1	9240
	R.AMELLQEEDLIEEDDIPVR.S		1		565.0305	2256.0930	2256.0831	4.38	0	(20)	-66537	1	11721
	R.AMELLQEEDLIEEDDIPVR.S		3		1129.0542	2256.0938	2256.0831	4.76	0	135	449125	1	11722
	R.AMELLQEEDLIEEDDIPVR.S		2		753.0391	2256.0954	2256.0831	5.43	0	(65)	-216245	1	11724
	R.A->M<-ELLQEEDLIEEDDIPVR.S		2	Oxidation (M)	758.3710	2272.0913	2272.0780	5.83	0	(33)	-109786	1	11829
	R.A->M<-ELLQEEDLIEEDDIPVR.S		7	Oxidation (M)	1137.0535	2272.0924	2272.0780	6.32	0	(92)	-306070	1	11830
F1MY85	Complement C5a anaphylatoxin OS=Bos taurus GN=C5 PE=4 SV=2	190751	1969	107(72)	45(33)	1.11	25%	F1MY85_uniprot		0.000560941	1.86617	-0.257	6.06
	Peptide	Unique	Matches	Modification	Observed	Mr(expt)	Mr(calc)	ppm	Miss	Score	#VALUE!	Rank	Query
	R.LNMDVK.V	U	1		360.1928	718.3710	718.3683	3.70	0	16	53229.6	1	28
	R.YFYNK.V	U	2		367.6812	733.3479	733.3435	5.95	0	15	49902.7	1	85
	K.EILRPK.R	U	1		378.2444	754.4743	754.4701	5.64	0	10	33268.5	1	153
	K.GNPPIYR.F	U	1		408.7243	815.4340	815.4290	6.15	0	30	99805.5	1	523
	K.IVHFGTR.D	U	2		415.2401	828.4656	828.4606	6.01	0	37	123093	1	587
	K.QYLIMGK.E	U	2		426.7383	851.4621	851.4575	5.45	0	24	79844.4	1	819
	K.YVLSPYK.L	U	2		435.2448	868.4749	868.4694	6.35	0	34	113113	1	865
	K.YGVWTIR.A	U	4		447.7480	893.4815	893.4759	6.28	0	39	129747	1	985
	R.IVACASYK.L	U	1		456.2384	910.4622	910.4582	4.36	0	48	159689	1	1097
	R.IPLNMVPK.T	U	3		456.2754	910.5362	910.5310	5.69	0	38	126420	1	1102
	R.DAEITFIK.K	U	1		468.7582	935.5018	935.4964	5.80	0	50	166342	1	1217
	K.WLSEEQR.Y	U	2		474.2358	946.4571	946.4508	6.66	0	32	106459	1	1281
	R.IQAGPICIK.A	U	2		500.2899	998.5653	998.5583	7.09	0	33	109786	1	1653
	R.DAEITFIKK.T	U	2		532.8070	1063.5995	1063.5913	7.64	1	43	143055	1	2157
	K.LQGTLPVEAR.E	U	2		542.3146	1082.6147	1082.6084	5.85	0	49	163016	1	2254
	K.IEEEAAKYR.N	U	1		554.7867	1107.5589	1107.5560	2.66	1	58	192957	1	2476
	K.NKGDLYHYK.M	U	1		379.8624	1136.5653	1136.5614	3.39	1	16	53229.6	1	2808
	K.NKGDLYHYK.M	U	1		569.2902	1136.5659	1136.5614	3.92	1	(9)	-29941.6	1	2810
	R.DSFVPNTGTAR.M	U	2		582.7891	1163.5637	1163.5571	5.65	0	48	159689	1	3046
	K.DMNYVNPVIK.W	U	1		596.8089	1191.6032	1191.5958	6.27	0	46	153035	1	3400
	K.SCCAIASQFR.A	U	2		600.2737	1198.5329	1198.5223	8.86	0	35	116440	1	3484
	K.YTATLLDIYK.A	U	2		600.8332	1199.6518	1199.6438	6.72	0	70	232879	1	3507
	R.FWKDDLQQR.D	U	2		618.3148	1234.6151	1234.6095	4.55	1	(25)	-83171.2	1	3848
	R.FWKDDLQQR.D	U	2		412.5461	1234.6165	1234.6095	5.70	1	54	179650	1	3849
	K.KIEEEAAKYR.N	U	1		412.8922	1235.6548	1235.6509	3.13	2	47	156362	1	3858
	K.SLLPVTKPEIR.S	U	3		418.2611	1251.7613	1251.7551	5.01	0	(48)	-159689	1	4043
	K.SLLPVTKPEIR.S	U	3		626.8882	1251.7619	1251.7551	5.49	0	56	186304	1	4045
	R.NADYSYSMWK.G	U	2		632.7726	1263.5306	1263.5230	6.03	0	67	222899	1	4172
	K.FQNSATLTIQPK.Q	U	2		674.3717	1346.7288	1346.7194	7.01	0	49	163016	1	5116
	R.VYSLNDDLKPAK.R	U	1		454.9155	1361.7248	1361.7191	4.19	0	(27)	-89824.9	1	5277
	R.VYSLNDDLKPAK.R	U	3		681.8700	1361.7254	1361.7191	4.69	0	74	246187	1	5278
	R.VYSLNDDLKPAKR.E	U	2		759.9205	1517.8265	1517.8202	4.18	1	64	212918	1	6837
	R.VYSLNDDLKPAKR.E	U	3		380.4649	1517.8305	1517.8202	6.81	1	(46)	-153035	1	6841
	R.VYSLNDDLKPAKR.E	U	3		506.9515	1517.8326	1517.8202	8.20	1	(50)	-166342	1	6844
	K.ISTSEEVCSFHLK.I	U	2		768.8770	1535.7395	1535.7290	6.82	0	64	212918	1	6975
	K.ISTSEEVCSFHLK.I	U	1		512.9205	1535.7396	1535.7290	6.90	0	(27)	-89824.9	1	6976
	K.VEIVAVTEENAFVK.Y	U	1		774.4271	1546.8397	1546.8243	9.97	0	1	3326.85	2	7116
	K.ELSYESLEDLNNK.Y	U	2		777.3753	1552.7361	1552.7256	6.72	0	80	266148	1	7177
	R.QSSVSHVYLEVTSK.H	U	1		782.4081	1562.8017	1562.7940	4.92	0	10	33268.5	1	7278
	K.TLDANQEITDLESK.K	U	3		788.8930	1575.7715	1575.7628	5.52	0	104	345992	1	7403
	R.GEQVQLSGTVYNYR.T	U	1		807.4035	1612.7924	1612.7845	4.91	0	60	199611	1	7770
	R.DNLEDNQKEMMQK.A	U	2		811.8647	1621.7149	1621.7076	4.55	1	56	186304	1	7863
	R.DNLEDNQKEMMQK.A	U	2		541.5797	1621.7171	1621.7076	5.89	1	(22)	-73190.7	1	7865
	R.ENDEPCKEILRPK.R	U	1		543.2783	1626.8130	1626.8035	5.80	1	11	36595.3	1	7912
	R.EIEAFGYSSSEYKR.I	U	2		833.3964	1664.7783	1664.7682	6.08	1	78	259494	1	8226
	R.EIEAFGYSSSEYKR.I	U	2		555.9339	1664.7799	1664.7682	7.03	1	(51)	-169669	1	8231
	K.AGEAAAERDAEITFIK.K	U	1		846.4404	1690.8662	1690.8526	8.05	1	0	0	2	8404
	K.TLDANQEITDLESKK.S	U	3		852.9409	1703.8672	1703.8577	5.54	1	108	359300	1	8508
	K.TLDANQEITDLESKK.S	U	4		568.9636	1703.8689	1703.8577	6.53	1	(78)	-259494	1	8512
	K.DSFDHLVGGIPVTLSAK.T	U	1		878.4727	1754.9308	1754.9203	5.95	0	(5)	-16634.2	1	8814
	K.DSFDHLVGGIPVTLSAK.T	U	2		585.9842	1754.9309	1754.9203	6.04	0	16	53229.6	1	8815
	K.AGEAAAERDAEITFIKK.T	U	1		607.3278	1818.9615	1818.9475	7.66	2	17	56556.4	1	9144
	R.VFQTLEKGDLGCGAGGGR.D	U	1		911.4534	1820.8922	1820.8840	4.52	1	18	59883.3	1	9153
	K.TEDLDLPEENQASEDYR.A	U	1		1012.4427	2022.8708	2022.8654	2.69	0	91	302743	1	10556
	K.TEDLDLPEENQASEDYR.A	U	1		675.2989	2022.8750	2022.8654	4.76	0	(26)	-86498.1	1	10557
	K.ENSDYQPVKLQGTLPVEAR.E	U	1		715.3773	2143.1100	2143.0909	8.88	1	15	49902.7	1	11169
	K.CGNQLEVHLSPETDAYSPGQR.V	U	4		786.7014	2357.0824	2357.0706	5.01	0	92	306070	1	12303
	K.CGNQLEVHLSPETDAYSPGQR.V	U	2		1179.5504	2357.0863	2357.0706	6.65	0	(29)	-96478.6	1	12305
P34955	Alpha-1-antiproteinase OS=Bos taurus GN=SERPINA1 PE=1 SV=1	46417	1933	132(68)	22(18)	4.57	37%	P34955_uniprot		0.00284379	9.46085	-0.056	6.05
	Peptide	Unique	Matches	Modification	Observed	Mr(expt)	Mr(calc)	ppm	Miss	Score	#VALUE!	Rank	Query
	K.IVELVK.V		6		350.7357	699.4568	699.4531	5.30	0	32	106459	1	5
	K.VPMMNR.L	U	1		374.1877	746.3607	746.3567	5.38	0	(25)	-83171.2	1	102
	K.SPLFVGK.V	U	4		374.2260	746.4374	746.4327	6.34	0	38	126420	1	111
	K.VPM->M<-NR.L	U	2	Oxidation (M)	382.1850	762.3555	762.3517	5.06	0	(21)	-69863.8	1	189
	K.VP->M<-MNR.L	U	1	Oxidation (M)	382.1854	762.3562	762.3517	5.92	0	35	116440	1	190
	R.ADLSGITK.E	U	2		402.7287	803.4429	803.4389	5.02	0	43	143055	1	443
	K.AALTIDEK.G	U	1		430.7422	859.4698	859.4651	5.46	0	53	176323	1	823
	K.INDYVEK.G	U	1		440.7266	879.4386	879.4338	5.52	0	36	119767	1	930
	K.LNNELLAK.F	U	2		457.7720	913.5294	913.5232	6.80	0	66	219572	1	1127
	K.KINDYVEK.G	U	1		504.7736	1007.5326	1007.5287	3.87	1	49	163016	1	1690
	K.GNTHTEILK.G	U	2		506.7770	1011.5395	1011.5349	4.58	0	31	103132	1	1720
	K.WEKPFEMK.H	U	1		365.5189	1093.5348	1093.5266	7.43	0	(11)	-36595.3	1	2364
	K.WEKPFEMK.H	U	3		547.7747	1093.5349	1093.5266	7.55	0	19	63210.1	1	2365
	K.KKINDYVEK.G	U	1		568.8219	1135.6292	1135.6237	4.90	2	23	76517.5	1	2799
	K.LSISETYDLK.S	U	34		584.8130	1167.6114	1167.6023	7.82	0	69	229553	1	3142
	K.LVDTFLEDVK.N	U	3		589.8218	1177.6291	1177.6231	5.15	0	62	206265	1	3253
	K.YASSANLHLPK.L	U	4		400.8853	1199.6340	1199.6298	3.48	0	(54)	-179650	1	3495
	K.YASSANLHLPK.L	U	5		600.8254	1199.6362	1199.6298	5.31	0	69	229553	1	3498
	K.GKWEKPFE->M<-K.H	U	1	Oxidation (M)	648.3299	1294.6452	1294.6380	5.62	1	6	19961.1	1	4529
	R.DFHVDEQTTVK.V	U	3		440.2160	1317.6261	1317.6201	4.53	0	(42)	-139728	1	4852
	R.DFHVDEQTTVK.V	U	4		659.8211	1317.6277	1317.6201	5.73	0	69	229553	1	4855
	K.INDYVEKGSHGK.I	U	2		449.5644	1345.6714	1345.6626	6.55	1	(32)	-106459	1	5100
	K.INDYVEKGSHGK.I	U	2		673.8436	1345.6727	1345.6626	7.50	1	40	133074	1	5101
	R.LGMFDLHYCDK.L	U	2		699.8174	1397.6203	1397.6108	6.82	0	52	172996	1	5612
	R.LGMFDLHYCDK.L	U	1		466.8810	1397.6212	1397.6108	7.45	0	(20)	-66537	1	5614
	K.SVLGDVGITEVFSDR.A	U	3		531.9447	1592.8123	1592.8046	4.80	0	(60)	-199611	1	7568
	K.SVLGDVGITEVFSDR.A	U	27		797.4139	1592.8132	1592.8046	5.39	0	106	352646	1	7571
	K.LQQLEDKLNNELLAK.F	U	3		884.9992	1767.9839	1767.9730	6.14	1	89	296090	1	8894
	K.LQQLEDKLNNELLAK.F	U	3		590.3357	1767.9854	1767.9730	7.02	1	(64)	-212918	1	8896
	K.HTTERDFHVDEQTTVK.V	U	1		648.3180	1941.9323	1941.9181	7.33	1	1	3326.85	1	10026
	R.DFHVDEQTTVKVPMMNR.L	U	2		682.9994	2045.9763	2045.9663	4.91	1	32	106459	1	10721
	R.DFHVDEQTTVKVPMMNR.L	U	3		512.5024	2045.9804	2045.9663	6.90	1	(20)	-66537	1	10724
	R.DFHVDEQTTVKVPMMNR.L	U	1		1023.9982	2045.9819	2045.9663	7.63	1	(4)	-13307.4	1	10725
B0JYN6	Alpha-2-HS-glycoprotein OS=Bos taurus GN=AHSG PE=2 SV=1	39193	1707	91(61)	14(12)	4.95	36%	B0JYN6_uniprot		0.00232184	7.72442	-0.025	5.26
P12763	Alpha-2-HS-glycoprotein OS=Bos taurus GN=AHSG PE=1 SV=2	39193	1707	91(61)	14(12)		36%	P12763_uniprot			0
	Peptide	Unique	Matches	Modification	Observed	Mr(expt)	Mr(calc)	ppm	Miss	Score	#VALUE!	Rank	Query
	R.IRYFK.I	U	3		363.7199	725.4253	725.4224	4.00	1	21	69863.8	1	51
	R.AHYDLR.H	U	6		387.7002	773.3859	773.3820	5.03	0	36	119767	1	226
	K.QYGFCK.G	U	3		401.6839	801.3532	801.3480	6.60	0	18	59883.3	1	435
	K.ALGGEDVR.V	U	1		408.7153	815.4161	815.4137	2.92	0	54	179650	1	522
	K.CNLLAEK.Q	U	2		424.2235	846.4325	846.4269	6.57	0	45	149708	1	765
	K.HTLNQIDSVK.V	U	1		385.5446	1153.6121	1153.6091	2.59	0	(37)	-123093	1	2933
	K.HTLNQIDSVK.V	U	7		577.8144	1153.6142	1153.6091	4.42	0	72	239533	1	2935
	K->.<-QDGQFSVLFTK.C	U	7	Gln->pyro-Glu (N-term Q)	626.8178	1251.6209	1251.6136	5.88	0	(50)	-166342	1	4024
	K.QDGQFSVLFTK.C	U	1		423.8884	1268.6435	1268.6401	2.63	0	(24)	-79844.4	1	4229
	K.QDGQFSVLFTK.C	U	15		635.3315	1268.6485	1268.6401	6.63	0	80	266148	1	4249
	K.CDSSPDSAEDVR.K	U	1		669.2716	1336.5287	1336.5201	6.39	0	74	246187	1	4980
	K.CDSSPDSAEDVRK.L	U	1		489.2153	1464.6242	1464.6151	6.20	1	49	163016	1	6332
	K.TPIVGQPSIPGGPVR.L	U	3		492.2868	1473.8386	1473.8304	5.56	0	(38)	-126420	1	6451
	K.TPIVGQPSIPGGPVR.L	U	7		737.9275	1473.8404	1473.8304	6.82	0	60	199611	1	6456
	R.GYKHTLNQIDSVK.V	U	1		751.9055	1501.7964	1501.7889	4.99	1	(19)	-63210.1	1	6748
	R.GYKHTLNQIDSVK.V	U	2		376.4568	1501.7981	1501.7889	6.11	1	(19)	-63210.1	1	6751
	R.GYKHTLNQIDSVK.V	U	4		501.6067	1501.7983	1501.7889	6.29	1	59	196284	1	6753
	K.EVVDPTKCNLLAEK.Q	U	4		808.4253	1614.8360	1614.8287	4.54	1	76	252841	1	7790
	K.EVVDPTKCNLLAEK.Q	U	3		539.2877	1614.8413	1614.8287	7.83	1	(46)	-153035	1	7797
	R->.<-QQTQHAVEGDCDIHVLK.Q	U	3	Gln->pyro-Glu (N-term Q)	654.3140	1959.9203	1959.9109	4.77	0	90	299416	1	10147
	R->.<-QQTQHAVEGDCDIHVLK.Q	U	2	Gln->pyro-Glu (N-term Q)	980.9675	1959.9204	1959.9109	4.84	0	(55)	-182977	1	10148
	R.QQTQHAVEGDCDIHVLK.Q	U	3		659.9889	1976.9448	1976.9374	3.74	0	(45)	-149708	1	10263
	R.QQTQHAVEGDCDIHVLK.Q	U	2		989.4802	1976.9459	1976.9374	4.27	0	(47)	-156362	1	10266
	R.QQTQHAVEGDCDIHVLK.Q	U	4		495.2446	1976.9492	1976.9374	5.94	0	(35)	-116440	1	10270
	K.EPACDDPDTEQAALAAVDYINK.H	U	3		802.7023	2405.0850	2405.0693	6.54	0	(50)	-166342	1	12483
	K.EPACDDPDTEQAALAAVDYINK.H	U	2		1203.5502	2405.0858	2405.0693	6.87	0	101	336012	1	12484
K4JF16	Alpha-2-macroglobulin variant 23 OS=Bos taurus GN=A2M PE=2 SV=1	102208	1563	119(73)	33(30)	2.31	34%	K4JF16_uniprot		0.00116429	3.87343	-0.203	5.68
	Peptide	Unique	Matches	Modification	Observed	Mr(expt)	Mr(calc)	ppm	Miss	Score	#VALUE!	Rank	Query
	R.GIPFTGK.V		3		360.2096	718.4046	718.4014	4.52	0	29	96478.6	1	29
	K.GTSLSIR.V		1		367.2157	732.4169	732.4130	5.34	0	24	79844.4	1	82
	K.VLLVDGK.G		2		372.2384	742.4622	742.4589	4.52	0	41	136401	1	93
	R.GEAFTLK.A		3		383.2125	764.4104	764.4068	4.69	0	36	119767	1	204
	K.FEVQVR.M		2		389.2185	776.4225	776.4181	5.64	0	38	126420	1	239
	K.RTTVLVK.N		1		408.7700	815.5254	815.5229	3.11	1	11	36595.3	1	526
	K.AGALCLSR.D		2		424.2294	846.4442	846.4382	7.13	0	61	202938	1	768
	R.DLKPAIVK.V		3		442.2868	882.5590	882.5538	5.84	0	37	123093	1	977
	R.VTMNMCR.K		1		456.2003	910.3861	910.3823	4.15	0	37	123093	1	1096
	K.RQEFEMK.I		1		484.2391	966.4637	966.4593	4.61	1	28	93151.8	1	1415
	K.IKGTSLSIR.V		1		487.8054	973.5963	973.5920	4.39	1	29	96478.6	1	1461
	K.ATVLNYLPK.C		4		509.8020	1017.5894	1017.5859	3.47	0	38	126420	1	1775
	R.SLFTDVVAEK.D		3		554.8014	1107.5882	1107.5812	6.35	0	64	212918	1	2479
	K.GATEITTTITK.L		3		568.3166	1134.6187	1134.6132	4.87	0	55	182977	1	2780
	K.LSFVTVDSNLR.R		3		625.8439	1249.6732	1249.6667	5.23	0	54	179650	1	4003
	R.DTGLGLSPTASLR.V		5		644.3527	1286.6908	1286.6830	6.01	0	57	189630	1	4425
	K.TQTVQAHYVLK.G		2		644.3602	1286.7059	1286.6983	5.92	0	42	139728	1	4431
	R.VTASPQSLCALR.A		1		651.8486	1301.6827	1301.6762	5.03	0	64	212918	1	4609
	R.YEVEHCLDNK.V		2		653.7919	1305.5693	1305.5659	2.59	0	52	172996	1	4683
	R.YEVEHCLDNK.V		1		436.1975	1305.5707	1305.5659	3.65	0	(20)	-66537	1	4684
	R.IQHHTLLASPVR.A		1		457.9360	1370.7863	1370.7783	5.86	0	25	83171.2	1	5307
	K.LSFVTVDSNLRR.G		1		703.8945	1405.7745	1405.7678	4.80	1	(8)	-26614.8	1	5695
	K.LSFVTVDSNLRR.G		2		469.5991	1405.7754	1405.7678	5.40	1	23	76517.5	1	5696
	R.SNSFVYLEPLPR.E		2		474.5874	1420.7403	1420.7350	3.69	0	(47)	-156362	1	5882
	R.SNSFVYLEPLPR.E		4		711.3775	1420.7404	1420.7350	3.80	0	58	192957	1	5883
	K.IQEEGTEVELTGK.G		4		716.8659	1431.7173	1431.7093	5.57	0	73	242860	1	5971
	R.TEVSNNHVLIYLDK.V		2		548.9600	1643.8582	1643.8519	3.87	0	(28)	-93151.8	1	8087
	R.TEVSNNHVLIYLDK.V		2		822.9378	1643.8611	1643.8519	5.60	0	67	222899	1	8088
	R.NPSNCYGEESNAVCEK.F		1		929.3768	1856.7390	1856.7305	4.57	0	40	133074	1	9368
	R.LLIYAILPDGEVVGDSAR.Y		2		634.3556	1900.0451	1900.0306	7.66	0	(48)	-159689	1	9669
	R.LLIYAILPDGEVVGDSAR.Y		3		951.0309	1900.0473	1900.0306	8.82	0	57	189630	1	9671
	R.DFVHFDDTSEPPTETVR.K		4		996.4598	1990.9050	1990.8909	7.09	0	58	192957	1	10341
	R.DFVHFDDTSEPPTETVR.K		5		664.6424	1990.9054	1990.8909	7.28	0	(36)	-119767	1	10343
	K.GSGGTAEHPFTVEEFVLPK.F		3		1001.5057	2000.9969	2000.9844	6.27	0	52	172996	1	10413
	K.GSGGTAEHPFTVEEFVLPK.F		3		668.0070	2000.9991	2000.9844	7.33	0	(39)	-129747	1	10417
	R.DFVHFDDTSEPPTETVRK.Y		3		707.3412	2119.0017	2118.9858	7.50	1	(13)	-43249	1	11030
	R.DFVHFDDTSEPPTETVRK.Y		1		530.7577	2119.0019	2118.9858	7.58	1	25	83171.2	1	11031
	K.YRNPSNCYGEESNAVCEK.F		1		726.3081	2175.9025	2175.8949	3.48	1	34	113113	1	11319
	R.NRDFVHFDDTSEPPTETVR.K		2		1131.5303	2261.0460	2261.0349	4.90	1	(36)	-119767	1	11755
	R.NRDFVHFDDTSEPPTETVR.K		7		754.6903	2261.0491	2261.0349	6.28	1	87	289436	1	11762
	R.NRDFVHFDDTSEPPTETVR.K		2		566.2700	2261.0510	2261.0349	7.10	1	(27)	-89824.9	1	11766
	R.NRDFVHFDDTSEPPTETVRK.Y		6		797.3879	2389.1420	2389.1299	5.07	2	63	209592	1	12430
	R.NRDFVHFDDTSEPPTETVRK.Y		8		598.2935	2389.1450	2389.1299	6.32	2	(26)	-86498.1	1	12434
	K.NEESLVFVQTDKPIYKPEQTVK.F		3		648.8478	2591.3623	2591.3483	5.40	0	(21)	-69863.8	1	13155
	K.NEESLVFVQTDKPIYKPEQTVK.F		3		864.7952	2591.3637	2591.3483	5.95	0	39	129747	1	13157
F1MMD7	Inter-alpha-trypsin inhibitor heavy chain H4 OS=Bos taurus GN=ITIH4 PE=4 SV=2	101634	1461	99(61)	28(24)	1.59	26%	F1MMD7_uniprot		0.000974083	3.24063	-0.234	6.22
Q5EA67	Inter-alpha (Globulin) inhibitor H4 (Plasma Kallikrein-sensitive glycoprotein) OS=Bos taurus GN=ITIH4 PE=2 SV=1	101617	1461	99(61)	28(24)		26%	Q5EA67_uniprot			0
	Peptide	Unique	Matches	Modification	Observed	Mr(expt)	Mr(calc)	ppm	Miss	Score	#VALUE!	Rank	Query
	R.LCVDLR.R		3		388.2126	774.4107	774.4058	6.30	0	57	189630	1	231
	R.VYLGPMR.F		4		418.2312	834.4478	834.4422	6.72	0	(41)	-136401	1	615
	R.VYLGP->M<-R.F		11	Oxidation (M)	426.2279	850.4413	850.4371	4.97	0	46	153035	1	807
	K.GSELVVAGK.L		1		430.2483	858.4820	858.4811	1.11	0	40	133074	1	822
	R.FGHSVGDR.T		4		437.7146	873.4146	873.4093	6.09	0	34	113113	1	897
	K.NVIFVIDK.S		4		474.2835	946.5524	946.5488	3.85	0	26	86498.1	1	1282
	K.VRPQQLVK.H		2		484.3086	966.6026	966.5974	5.36	0	33	109786	1	1421
	R.LLLQNTDR.F		3		486.7799	971.5451	971.5400	5.32	0	54	179650	1	1442
	K.MALENGGLAR.R		3		516.2723	1030.5301	1030.5229	6.98	0	57	189630	1	1891
	R.FAHTVITSR.V		2		516.2875	1030.5604	1030.5560	4.29	0	34	113113	1	1896
	K.EISCWSVEL.-		1		561.7640	1121.5135	1121.5063	6.44	0	9	29941.6	1	2644
	K.LDYQESPPGK.E		2		567.2793	1132.5440	1132.5400	3.54	0	6	19961.1	1	2769
	R.HLGAYELLLK.V		2		578.8436	1155.6727	1155.6652	6.53	0	50	166342	1	2955
	R.EATFQMELPK.K		4		597.2991	1192.5837	1192.5798	3.29	0	58	192957	1	3409
	R.FKPTLSQQQK.Y		2		402.2296	1203.6670	1203.6612	4.85	0	(17)	-56556.4	1	3567
	R.FKPTLSQQQK.Y		2		602.8408	1203.6671	1203.6612	4.92	0	40	133074	1	3568
	R.EATFQ->M<-ELPK.K		2	Oxidation (M)	605.2973	1208.5800	1208.5747	4.42	0	(55)	-182977	1	3614
	K.YIFHSFIER.L		1		606.3190	1210.6235	1210.6135	8.28	0	3	9980.55	1	3642
	K.ETLYSVMPGLK.V		3		619.3321	1236.6496	1236.6424	5.85	0	42	139728	1	3870
	K.EGLLLLSRPDR.V		3		634.8733	1267.7320	1267.7248	5.70	0	33	109786	1	4222
	K.EGLLLLSRPDR.V		1		423.5850	1267.7331	1267.7248	6.57	0	(29)	-96478.6	1	4225
	R.EATFQMELPKK.A		2		661.3488	1320.6829	1320.6747	6.21	1	53	176323	1	4899
	R.EATFQMELPKK.A		2		441.2352	1320.6838	1320.6747	6.84	1	(22)	-73190.7	1	4900
	K.AAAQEQYSAAVAR.G		2		668.3379	1334.6613	1334.6578	2.63	0	75	249514	1	4968
	K.QDTVLDGSFIVR.Y	U	7		675.3603	1348.7060	1348.6987	5.43	0	74	246187	1	5145
	R.EQSPDVLLAQIR.G		1		456.9228	1367.7467	1367.7409	4.29	0	22	73190.7	1	5301
	R.VTIGLLFWDGPGK.G		1		701.8959	1401.7772	1401.7657	8.23	0	32	106459	1	5662
	R.ELKLDYQESPPGK.E		3		752.3919	1502.7693	1502.7616	5.07	1	76	252841	1	6761
	K.VTFELVYEELLAR.H		2		791.4360	1580.8575	1580.8450	7.93	0	57	189630	1	7452
	K.VTFELVYEELLAR.H		1		527.9602	1580.8588	1580.8450	8.74	0	(1)	-3326.85	1	7453
	K.EKAAAQEQYSAAVAR.G		1		796.9113	1591.8079	1591.7954	7.90	1	57	189630	1	7554
	K.LREQSPDVLLAQIR.G		2		546.6529	1636.9368	1636.9260	6.61	1	(47)	-156362	1	8028
	K.LREQSPDVLLAQIR.G		2		819.4758	1636.9371	1636.9260	6.77	1	89	296090	1	8030
	K.VQNDIDIYSLTVDSK.V		1		855.4356	1708.8565	1708.8519	2.69	0	66	219572	1	8541
	K.VQNDIDIYSLTVDSK.V		1		570.6277	1708.8614	1708.8519	5.55	0	(8)	-26614.8	1	8543
	K.YPEKQDTVLDGSFIVR.Y	U	5		933.9896	1865.9646	1865.9523	6.56	1	96	319378	1	9441
	K.YPEKQDTVLDGSFIVR.Y	U	6		622.9955	1865.9646	1865.9523	6.58	1	(65)	-216245	1	9442
P81187	Complement factor B OS=Bos taurus GN=CFB PE=1 SV=2	86737	1150	70(45)	31(24)	2.16	35%	P81187_uniprot		0.000807037	2.68489	-0.462	7.87
	Peptide	Unique	Matches	Modification	Observed	Mr(expt)	Mr(calc)	ppm	Miss	Score	#VALUE!	Rank	Query
	R.KAVYIK.N		1		361.2362	720.4577	720.4534	6.06	1	32	106459	1	41
	R.KEWEVK.E	U	2		409.7261	817.4376	817.4334	5.15	1	27	89824.9	1	537
	R.KVGSQYR.L	U	1		419.2344	836.4543	836.4504	4.65	1	29	96478.6	1	624
	R.YLLDIGR.N	U	4		425.2480	848.4814	848.4756	6.81	0	46	153035	1	790
	K.EILFHPK.Y	U	2		442.2581	882.5016	882.4963	6.01	0	19	63210.1	1	973
	K.VASYGVKPK.Y	U	1		474.7824	947.5501	947.5440	6.48	0	37	123093	1	1295
	R.VTYYCNR.G	U	1		488.2230	974.4315	974.4280	3.59	0	34	113113	1	1463
	K.DVSEVVTPR.F	U	2		501.2697	1000.5249	1000.5189	5.93	0	42	139728	1	1662
	R.CYDGYTLR.G	U	2		524.2351	1046.4557	1046.4491	6.25	0	64	212918	1	1969
	K.LQNEDLGFL.-	U	2		524.7722	1047.5298	1047.5237	5.83	0	19	63210.1	1	1986
	K.GDSGGPLIIHK.R	U	1		547.3066	1092.5986	1092.5928	5.35	0	66	219572	1	2355
	K.GDSGGPLIIHK.R	U	1		365.2070	1092.5991	1092.5928	5.79	0	(31)	-103132	1	2357
	R.DALRAPGYEK.V	U	1		373.8657	1118.5752	1118.5720	2.83	1	(15)	-49902.7	1	2612
	R.DALRAPGYEK.V	U	3		560.2953	1118.5761	1118.5720	3.72	1	46	153035	1	2613
	K.RPQQVPGYAR.D	U	1		586.3229	1170.6312	1170.6258	4.64	0	38	126420	1	3184
	K.NCLRDFIEK.V	U	2		597.8037	1193.5929	1193.5863	5.53	1	29	96478.6	1	3434
	K.NCLRDFIEK.V	U	2		398.8721	1193.5944	1193.5863	6.79	1	(3)	-9980.55	1	3437
	K.VKDVSEVVTPR.F	U	3		614.8511	1227.6876	1227.6823	4.30	1	55	182977	1	3750
	K.VKDVSEVVTPR.F	U	2		410.2371	1227.6896	1227.6823	5.95	1	(48)	-159689	1	3753
	K.DIEALFVSESK.K	U	2		619.3226	1236.6307	1236.6238	5.62	0	67	222899	1	3868
	K.YGLVTYATEPK.V	U	3		621.3281	1240.6416	1240.6339	6.15	0	60	199611	1	3904
	K.GDSGGPLIIHKR.S	U	1		625.3558	1248.6971	1248.6939	2.60	1	31	103132	1	3986
	K.EKLQNEDLGFL.-	U	2		653.3419	1304.6693	1304.6612	6.19	1	24	79844.4	1	4665
	R.ALLEVYNMMSR.E	U	2		663.8355	1325.6563	1325.6471	6.95	0	36	119767	1	4931
	R.ALLEVYNM->M<-SR.E	U	2	Oxidation (M)	671.8323	1341.6501	1341.6421	6.01	0	(11)	-36595.3	1	5016
	K.DIEALFVSESKK.T	U	1		455.9165	1364.7276	1364.7187	6.49	1	3	9980.55	1	5293
	R.STGSWSTLQTQDR.K	U	2		733.8516	1465.6886	1465.6797	6.02	0	90	299416	1	6350
	R.LEDRVTYYCNR.G	U	1		496.9040	1487.6903	1487.6827	5.13	1	32	106459	1	6577
	K.EWEVKEILFHPK.Y	U	1		777.9236	1553.8326	1553.8242	5.42	1	14	46575.9	1	7200
	R.STGSWSTLQTQDRK.I	U	1		532.2682	1593.7829	1593.7747	5.16	1	(28)	-93151.8	1	7603
	R.STGSWSTLQTQDRK.I	U	2		797.8991	1593.7837	1593.7747	5.62	1	56	186304	1	7604
	K.GIPEFYDYDVALVR.L	U	2		828.9222	1655.8298	1655.8195	6.21	0	80	266148	1	8165
	K.GIPEFYDYDVALVR.L	U	2		552.9507	1655.8304	1655.8195	6.57	0	(27)	-89824.9	1	8166
	R.STTCQQQMQELLPAK.D	U	1		881.9348	1761.8551	1761.8389	9.15	0	16	53229.6	1	8861
	R.FLCTGGVDPYADPNTCK.G	U	2		957.9277	1913.8409	1913.8288	6.32	0	37	123093	1	9755
	R.CPRPQDFENGEYWPR.A	U	1		650.9606	1949.8601	1949.8479	6.25	0	35	116440	1	10065
	K.LQGMENLEDVFVQMLDESR.T	U	1		751.6958	2252.0656	2252.0453	9.00	0	(41)	-136401	1	11671
	K.LQGMENLEDVFVQMLDESR.T	U	1		1127.0402	2252.0658	2252.0453	9.09	0	(79)	-262821	1	11672
	K.LQGMENLEDVFVQ->M<-LDESR.T	U	1	Oxidation (M)	757.0267	2268.0582	2268.0402	7.92	0	(40)	-133074	1	11802
	K.LQG->M<-ENLEDVFVQMLDESR.T	U	1	Oxidation (M)	757.0270	2268.0593	2268.0402	8.41	0	(65)	-216245	1	11803
	K.LQG->M<-ENLEDVFVQMLDESR.T	U	1	Oxidation (M)	1135.0377	2268.0609	2268.0402	9.11	0	84	279455	1	11804
	K.SSEADWVTDQLNQINYADHK.L	U	1		1167.5418	2333.0689	2333.0560	5.55	0	(14)	-46575.9	1	12203
	K.SSEADWVTDQLNQINYADHK.L	U	2		778.6975	2333.0707	2333.0560	6.30	0	60	199611	1	12204
P01030	Complement C4 (Fragments) OS=Bos taurus GN=C4 PE=1 SV=2	103018	1125	85(52)	31(24)	1.56	34%	P01030_uniprot		0.000825099	2.74498	-0.318	6.15
	Peptide	Unique	Matches	Modification	Observed	Mr(expt)	Mr(calc)	ppm	Miss	Score	#VALUE!	Rank	Query
	K.INVEVR.G		1		365.2179	728.4212	728.4181	4.35	0	57	189630	1	69
	K.ILQVER.E		2		379.2341	756.4536	756.4494	5.65	0	43	143055	1	157
	R.LQLEPGK.E		1		392.7339	783.4533	783.4490	5.43	0	11	36595.3	1	243
	R.AVDLIQK.G		2		393.7421	785.4696	785.4647	6.23	0	40	133074	1	260
	R.ANTFLGAK.A		2		411.2321	820.4497	820.4443	6.58	0	55	182977	1	547
	K.FACYSPR.V		2		450.7072	899.3999	899.3960	4.34	0	40	133074	1	1008
	R.VDYGFQVK.V		3		478.2507	954.4868	954.4811	5.97	0	37	123093	1	1320
	R.TRGQVGLAR.V		1		479.2859	956.5572	956.5516	5.93	1	32	106459	1	1337
	R->.<-QGSFQGGFR.S		2	Gln->pyro-Glu (N-term Q)	483.7274	965.4403	965.4356	4.96	0	(13)	-43249	1	1400
	R.QGSFQGGFR.S		2		492.2415	982.4684	982.4621	6.38	0	46	153035	1	1523
	K.CSVFYGAPR.K		7		528.7535	1055.4924	1055.4859	6.21	0	45	149708	1	2082
	K.DRAVDLIQK.G		1		529.3070	1056.5993	1056.5927	6.25	1	12	39922.2	1	2095
	K.LGQYTSPVAK.R		2		532.2950	1062.5755	1062.5710	4.31	0	63	209592	1	2149
	R.GQQDLEGYR.M		3		533.2529	1064.4912	1064.4887	2.36	0	50	166342	1	2166
	R.ITQVLHFTK.D		3		362.8835	1085.6286	1085.6233	4.86	0	(29)	-96478.6	1	2282
	R.ITQVLHFTK.D		2		543.8219	1085.6292	1085.6233	5.44	0	50	166342	1	2285
	R.DGSYGAWLHR.D		3		581.2786	1160.5427	1160.5363	5.52	0	60	199611	1	3007
	R.VAHNNLMA->M<-AK.D		1	Oxidation (M)	405.8726	1214.5959	1214.5900	4.85	0	4	13307.4	1	3692
	K.RDGSYGAWLHR.D		1		659.3214	1316.6283	1316.6374	-6.94	1	0	0	1	4841
	R.GQQDLEGYRMK.F		1		662.8252	662.8252	1323.6358	8.86	1	(1)	-3326.85	2	4921
	R.GSFDFPVGDAISK.I		3		670.3331	1338.6517	1338.6456	4.56	0	51	169669	1	4988
	R.GQQDLEGYR->M<-K.F		1	Oxidation (M)	670.8192	1339.6239	1339.6190	3.61	1	15	49902.7	1	4996
	R.ADLEKLTSLSDR.Y		1		449.9122	1346.7147	1346.7041	7.83	1	23	76517.5	1	5113
	K.AELADQAASWLTR.Q		3		716.3685	1430.7225	1430.7154	4.99	0	96	319378	1	5965
	K.ILSLAQDQVGGSAEK.L	U	2		758.4088	1514.8029	1514.7940	5.89	0	78	259494	1	6828
	R.DDGPFHDPCPVIHR.E		3		554.5905	1660.7497	1660.7417	4.86	0	33	109786	1	8190
	R.DDGPFHDPCPVIHR.E		1		416.1954	1660.7526	1660.7417	6.60	0	(11)	-36595.3	1	8193
	R.DDGPFHDPCPVIHR.E		2		831.3845	1660.7545	1660.7417	7.73	0	(4)	-13307.4	1	8196
	K.EYLIMGLDGATYDLK.G		2		851.4288	1700.8431	1700.8331	5.88	0	76	252841	1	8487
	K.EYLI->M<-GLDGATYDLK.G		2	Oxidation (M)	859.4265	1716.8385	1716.8280	6.09	0	(33)	-109786	1	8614
	R.EPFLSCCQFAESLR.K	U	2		872.4006	1742.7866	1742.7756	6.29	0	65	216245	1	8749
	R.EEMVYELNPLDPLGR.T		1		887.9443	1773.8741	1773.8607	7.57	0	42	139728	1	8927
	K.LLSTLCSADVCQCAEGK.C		3		956.4387	1910.8629	1910.8536	4.85	0	87	289436	1	9745
	R.YLDKTEQWSMLPPETK.D		3		655.9974	1964.9705	1964.9553	7.71	1	22	73190.7	1	10197
	R.TLEIPGNSDPNIIPEGDFK.S		1		686.0160	2055.0263	2055.0160	5.00	0	(15)	-49902.7	1	10763
	R.TLEIPGNSDPNIIPEGDFK.S		4		1028.5212	2055.0279	2055.0160	5.79	0	47	156362	1	10765
	K.GDPQYLLDSNSWIEEMPSER.M		2		789.3599	2365.0578	2365.0532	1.92	0	(26)	-86498.1	1	12329
	K.GDPQYLLDSNSWIEEMPSER.M		1		1183.5397	2365.0648	2365.0532	4.90	0	95	316051	1	12330
	K.GDPQYLLDSNSWIEE->M<-PSER.M		2	Oxidation (M)	1191.5380	2381.0614	2381.0481	5.56	0	(22)	-73190.7	1	12392
	K.GDPQYLLDSNSWIEE->M<-PSER.M		2	Oxidation (M)	794.6951	2381.0634	2381.0481	6.41	0	(46)	-153035	1	12397
	R.EGALHREEMVYELNPLDPLGR.T		1		813.4154	2437.2244	2437.2059	7.57	1	27	89824.9	1	12577
	R.EGALHREE->M<-VYELNPLDPLGR.T		1	Oxidation (M)	818.7500	2453.2282	2453.2009	11.1	1	(2)	-6653.7	1	12617
Q95121	Pigment epithelium-derived factor OS=Bos taurus GN=SERPINF1 PE=1 SV=1	46314	988	43(32)	13(12)	1.81	32%	Q95121_uniprot		0.000928445	3.0888	-0.18	6.57
	Peptide	Unique	Matches	Modification	Observed	Mr(expt)	Mr(calc)	ppm	Miss	Score	#VALUE!	Rank	Query
	K.ASFIPPLEK.S	U	4		501.2907	1000.5669	1000.5593	7.55	0	29	96478.6	1	1667
	K.LSYEGELTK.S	U	3		520.2711	1038.5276	1038.5233	4.10	0	42	139728	1	1930
	K.TVQAVLTIPK.L	U	1		535.3380	1068.6615	1068.6543	6.71	0	34	113113	1	2185
	K.DLLASVTAPQK.N	U	3		571.8295	1141.6445	1141.6343	8.96	0	70	232879	1	2870
	R.YGLDSDLNCK.I	U	1		592.7691	1183.5236	1183.5179	4.83	0	40	133074	1	3345
	R.DTDTGALLFIGK.I	U	4		625.8374	1249.6602	1249.6554	3.86	0	64	212918	1	3997
	K.LKLSYEGELTK.S	U	1		640.8624	1279.7102	1279.7023	6.14	1	17	56556.4	1	4365
	K.VPMMSDPQAVLR.Y	U	3		672.3480	1342.6815	1342.6737	5.78	0	70	232879	1	5022
	K.VPM->M<-SDPQAVLR.Y	U	3	Oxidation (M)	680.3448	1358.6750	1358.6686	4.70	0	(31)	-103132	1	5228
	K.VP->M<-MSDPQAVLR.Y	U	3	Oxidation (M)	680.3468	1358.6790	1358.6686	7.66	0	(50)	-166342	1	5231
	K.LQSLFDAPDFSK.I	U	2		684.3491	1366.6836	1366.6769	4.89	0	48	159689	1	5297
	K.TSLEDFYLDEER.T	U	3		758.8483	1515.6821	1515.6729	6.08	0	82	272802	1	6834
	K.LAAAVSNFGYDLYR.V	U	1		780.4003	1558.7861	1558.7780	5.22	0	42	139728	1	7242
	R.KTSLEDFYLDEER.T	U	2		822.8970	1643.7794	1643.7679	7.02	1	84	279455	1	8084
	R.KTSLEDFYLDEER.T	U	3		548.9340	1643.7802	1643.7679	7.53	1	(32)	-106459	1	8086
	R.VGFEWNEDGAGTNSSPGVQPAR.L	U	3		759.0217	2274.0434	2274.0302	5.81	0	(80)	-266148	1	11846
	R.VGFEWNEDGAGTNSSPGVQPAR.L	U	3		1138.0293	2274.0440	2274.0302	6.11	0	132	439144	1	11847
F1MYN5	Fibulin-1 OS=Bos taurus GN=FBLN1 PE=3 SV=2	81540	845	50(34)	18(15)	1.20	18%	F1MYN5_uniprot		0.000613196	2.04001	-0.303	4.94
A5D7S8	Fibulin-1 OS=Bos taurus GN=FBLN1 PE=2 SV=1	81527	845	50(34)	18(15)		18%	A5D7S8_uniprot			0
	Peptide	Unique	Matches	Modification	Observed	Mr(expt)	Mr(calc)	ppm	Miss	Score	#VALUE!	Rank	Query
	R.DSFDIIK.R	U	2		419.2241	836.4336	836.4280	6.68	0	22	73190.7	1	622
	R.DSFDIIKR.Y	U	3		497.2748	992.5350	992.5291	5.97	1	35	116440	1	1606
	K.AGYYFDGISR.T	U	3		574.7761	1147.5377	1147.5298	6.86	0	43	143055	1	2910
	R.TCVDINECR.R	U	1		583.7509	1165.4873	1165.4856	1.45	0	69	229553	1	3066
	R.GYHLNEEGTR.C	U	1		392.5209	1174.5409	1174.5367	3.57	0	(23)	-76517.5	1	3212
	R.GYHLNEEGTR.C	U	1		588.2790	1174.5435	1174.5367	5.85	0	42	139728	1	3213
	R.RSTDALRQEK.T	U	1		401.8878	1202.6415	1202.6367	3.94	2	12	39922.2	1	3557
	R.YMDGMTVGVVR.Q	U	3		614.3002	1226.5858	1226.5788	5.71	0	(58)	-192957	1	3740
	R.CCHCCLLGR.A	U	1		618.2523	1234.4900	1234.4828	5.82	0	25	83171.2	1	3838
	R.YMDG->M<-TVGVVR.Q	U	1	Oxidation (M)	622.2963	1242.5781	1242.5737	3.55	0	(47)	-156362	1	3915
	R.Y->M<-DGMTVGVVR.Q	U	2	Oxidation (M)	622.2989	1242.5833	1242.5737	7.76	0	64	212918	1	3916
	R.TCVDINECRR.Y	U	1		441.5372	1321.5897	1321.5867	2.26	1	26	86498.1	1	4903
	R.TCVDINECRR.Y	U	1		661.8029	1321.5913	1321.5867	3.47	1	(11)	-36595.3	1	4904
	K.RYMDGMTVGVVR.Q	U	1		692.3522	1382.6899	1382.6799	7.25	1	2	6653.7	1	5433
	R.CLAFECPENYR.R	U	3		729.8148	1457.6151	1457.6067	5.72	0	54	179650	1	6263
	R.EFTRPEEIIFLR.A	U	3		775.4271	1548.8397	1548.8300	6.25	0	47	156362	1	7142
	R.EFTRPEEIIFLR.A	U	3		517.2878	1548.8415	1548.8300	7.43	0	(28)	-93151.8	1	7146
	R.CLAFECPENYRR.S	U	1		807.8654	1613.7163	1613.7079	5.23	1	39	129747	1	7776
	R.CLAFECPENYRR.S	U	2		538.9128	1613.7167	1613.7079	5.48	1	(17)	-56556.4	1	7777
	R.STDALRQEKTDTVR.C	U	1		405.7164	1618.8364	1618.8275	5.51	2	(17)	-56556.4	1	7831
	R.STDALRQEKTDTVR.C	U	1		810.4257	1618.8369	1618.8275	5.83	2	(15)	-49902.7	1	7832
	R.STDALRQEKTDTVR.C	U	1		540.6198	1618.8376	1618.8275	6.27	2	40	133074	1	7833
	K.VSEIEEEQEDPYLNDR.C	U	3		982.9451	1963.8756	1963.8647	5.57	0	105	349319	1	10175
	K.VSEIEEEQEDPYLNDR.C	U	2		655.6330	1963.8772	1963.8647	6.37	0	(38)	-126420	1	10177
	K.GQETADFAPGDGGDLQETAK.V	U	2		1003.9585	2005.9024	2005.8865	7.95	0	102	339339	1	10433
	K.GQETADFAPGDGGDLQETAK.V	U	1		669.6418	2005.9037	2005.8865	8.58	0	(28)	-93151.8	1	10434
	K.VSEIEEEQEDPYLNDRCR.G	U	1		1141.0123	2280.0101	2279.9964	6.01	1	(4)	-13307.4	1	11900
	K.VSEIEEEQEDPYLNDRCR.G	U	2		761.0117	2280.0133	2279.9964	7.42	1	33	109786	1	11901
	K.GQETADFAPGDGGDLQETAKVSEIEEEQEDPYLNDR.C	U	1		988.9485	3951.7649	3951.7406	6.14	1	(13)	-43249	1	15797
	K.GQETADFAPGDGGDLQETAKVSEIEEEQEDPYLNDR.C	U	1		1318.2631	3951.7674	3951.7406	6.77	1	28	93151.8	1	15798
Q9N2I2	Plasma serine protease inhibitor OS=Bos taurus GN=SERPINA5 PE=1 SV=1	45439	835	47(32)	15(14)	2.54	33%	Q9N2I2_uniprot		0.00103435	3.44114	-0.109	9.4
	Peptide	Unique	Matches	Modification	Observed	Mr(expt)	Mr(calc)	ppm	Miss	Score	#VALUE!	Rank	Query
	K.IVDLIK.S	U	6		350.7360	699.4575	699.4531	6.32	0	46	153035	1	9
	K.INDYVAK.Q	U	1		411.7233	821.4321	821.4283	4.64	0	49	163016	1	549
	K.HILFLGK.V	U	1		414.2614	826.5083	826.5065	2.14	0	15	49902.7	1	580
	R.LELYLPK.F	U	2		438.2685	874.5224	874.5164	6.86	0	48	159689	1	912
	K.KINDYVAK.Q	U	1		475.7711	949.5276	949.5233	4.54	1	31	103132	1	1300
	R.RLELYLPK.F	U	3		516.3200	1030.6255	1030.6175	7.75	1	28	93151.8	1	1904
	R.DFVFDLYR.A	U	2		537.7695	1073.5245	1073.5182	5.87	0	30	99805.5	1	2199
	R.LPIQEAFLGAMR.T	U	4		673.3738	1344.7331	1344.7224	8.00	0	56	186304	1	5085
	R.LPIQEAFLGA->M<-R.T	U	2	Oxidation (M)	681.3703	1360.7260	1360.7173	6.44	0	(32)	-106459	1	5261
	R.EGEMEQVENGLK.E	U	1		681.8175	1361.6204	1361.6133	5.27	0	47	156362	1	5265
	K.QQDQFYYLLDR.N	U	3		744.8628	1487.7111	1487.7045	4.48	0	62	206265	1	6580
	R.EGEMEQVENGLKEK.T	U	3		810.3859	1618.7573	1618.7508	4.01	1	51	169669	1	7821
	K.STHEQDFYVTPETVVR.V	U	3		954.4665	1906.9185	1906.9061	6.51	0	85	282782	1	9715
	K.STHEQDFYVTPETVVR.V	U	4		636.6470	1906.9191	1906.9061	6.79	0	(54)	-179650	1	9717
	R.TLYLADTFPTNFEDPEGAK.K	U	3		1065.0143	2128.0140	2128.0001	6.55	0	85	282782	1	11090
	R.TLYLADTFPTNFEDPEGAK.K	U	2		710.3453	2128.0140	2128.0001	6.56	0	(36)	-119767	1	11091
	R.TLYLADTFPTNFEDPEGAKK.K	U	2		753.0438	2256.1095	2256.0950	6.40	1	61	202938	1	11726
	R.TLYLADTFPTNFEDPEGAKK.K	U	1		1129.0627	2256.1109	2256.0950	7.05	1	(2)	-6653.7	1	11727
	K.AQILEGLGIGPGEGSEEELHSASQR.L	U	2		855.4284	2563.2634	2563.2514	4.69	0	96	319378	1	13057
	K.AQILEGLGIGPGEGSEEELHSASQR.L	U	1		1282.6420	2563.2694	2563.2514	7.02	0	(18)	-59883.3	1	13058
F1N1I6	Gelsolin OS=Bos taurus GN=GSN PE=4 SV=1	85976	656	48(25)	20(13)	0.96	25%	F1N1I6_uniprot		0.000558295	1.85736	-0.409	5.86
	Peptide	Unique	Matches	Modification	Observed	Mr(expt)	Mr(calc)	ppm	Miss	Score	#VALUE!	Rank	Query
	R.TPITVVK.Q	U	2		379.2465	756.4784	756.4745	5.13	0	30	99805.5	1	159
	R.AVEVMPK.A	U	1		387.2163	772.4181	772.4153	3.59	0	37	123093	1	223
	K.TASDFISK.M	U	2		434.7263	867.4380	867.4338	4.88	0	28	93151.8	1	848
	K.TGALELLR.V	U	3		436.7664	871.5182	871.5127	6.28	0	68	226226	1	887
	R.RTPITVVK.Q	U	2		457.2976	912.5807	912.5757	5.56	1	23	76517.5	1	1119
	K.EPGLQIWR.V	U	3		499.7778	997.5410	997.5345	6.50	0	38	126420	1	1644
	R.YIETDPANR.D	U	2		539.7643	1077.5141	1077.5091	4.70	0	19	63210.1	1	2211
	K.RYIETDPANR.D	U	1		617.8143	1233.6141	1233.6102	3.19	1	9	29941.6	1	3831
	K.AGKEPGLQIWR.V	U	2		418.9056	1253.6948	1253.6880	5.41	1	(28)	-93151.8	1	4068
	K.AGKEPGLQIWR.V	U	2		627.8559	1253.6972	1253.6880	7.35	1	44	146381	1	4070
	K.HVVPNEVVVQR.L	U	3		638.3649	1274.7153	1274.7095	4.53	0	54	179650	1	4304
	K.HVVPNEVVVQR.L	U	1		425.9130	1274.7171	1274.7095	5.90	0	(42)	-139728	1	4305
	R.LATPARPGATQAR.A	U	1		655.3723	1308.7301	1308.7262	2.95	0	(2)	-6653.7	1	4746
	R.LATPARPGATQAR.A	U	1		437.2513	1308.7320	1308.7262	4.43	0	21	69863.8	1	4747
	K.AGALNSNDAFVLK.T	U	2		660.3564	1318.6982	1318.6881	7.67	0	68	226226	1	4874
	R.SEDCFILDHGK.D	U	1		440.8712	1319.5917	1319.5816	7.68	0	3	9980.55	1	4883
	R.YIETDPANRDR.R	U	1		675.3279	1348.6412	1348.6371	3.03	1	21	69863.8	1	5128
	R.YIETDPANRDR.R	U	1		450.5544	1348.6412	1348.6371	3.05	1	(20)	-66537	1	5129
	K.DSQEEEKTEALTSAK.R	U	1		833.3970	1664.7795	1664.7740	3.28	1	59	196284	1	8229
	K.DSQEEEKTEALTSAK.R	U	1		555.9346	1664.7821	1664.7740	4.81	1	(43)	-143055	1	8232
	K.TPSAAYLWVGAGASEAEK.T	U	3		904.4518	1806.8890	1806.8788	5.65	0	53	176323	1	9083
	K.TPSAAYLWVGAGASEAEK.T	U	1		603.3047	1806.8922	1806.8788	7.44	0	(1)	-3326.85	1	9085
	R->.<-QTQVSVLPEGGETPLFK.Q	U	1	Gln->pyro-Glu (N-term Q)	906.9782	1811.9419	1811.9306	6.24	0	(13)	-43249	1	9112
	K.DSQEEEKTEALTSAKR.Y	U	1		456.2267	1820.8779	1820.8752	1.51	2	19	63210.1	1	9152
	R.QTQVSVLPEGGETPLFK.Q	U	3		915.4917	1828.9688	1828.9571	6.43	0	60	199611	1	9186
	R.AQPVQVAEGSEPDSFWEALGGK.A	U	3		768.0409	2301.1008	2301.0913	4.13	0	(62)	-206265	1	12052
	R.AQPVQVAEGSEPDSFWEALGGK.A	U	2		1151.5590	2301.1034	2301.0913	5.23	0	87	289436	1	12053
	R.DPDQTDGPGLSYLSSHIANVER.V	U	1		791.0482	2370.1228	2370.1088	5.93	0	23	76517.5	1	12351
Q2KJF1	Alpha-1B-glycoprotein OS=Bos taurus GN=A1BG PE=1 SV=1	54091	655	25(16)	10(9)	0.92	25%	Q2KJF1_uniprot		0.000462184	1.53762	-0.127	5.3
	Peptide	Unique	Matches	Modification	Observed	Mr(expt)	Mr(calc)	ppm	Miss	Score	#VALUE!	Rank	Query
	R.GVTFLLR.L	U	2		403.2529	804.4912	804.4858	6.72	0	29	96478.6	1	451
	R.GAEEQLVPR.A	U	1		499.7704	997.5263	997.5192	7.06	0	74	246187	1	1642
	R.ALWTGALTPGR.D	U	3		571.8231	1141.6317	1141.6244	6.39	0	55	182977	1	2865
	R.FPLGPVTSTTR.G	U	1		588.3279	1174.6412	1174.6346	5.59	0	6	19961.1	1	3224
	R.VDGPLPRPQLR.A	U	1		624.3674	1246.7203	1246.7146	4.58	0	(1)	-3326.85	3	3960
	R.VDGPLPRPQLR.A	U	2		416.5808	1246.7205	1246.7146	4.74	0	23	76517.5	1	3961
	R.SLLSELSDPVELR.V	U	1		729.3979	1456.7812	1456.7773	2.70	0	92	306070	1	6259
	R.SLLSELSDPVELR.V	U	1		486.6025	1456.7857	1456.7773	5.77	0	(21)	-69863.8	1	6260
	R.LSALAAGDGSGYTCR.Y	U	3		749.8545	1497.6944	1497.6882	4.17	0	72	239533	1	6709
	R.VLSPAGPEAQFELR.G	U	3		757.4092	1512.8038	1512.7936	6.73	0	67	222899	1	6823
	R.CEAEVPDVSFLLLR.A	U	2		824.4305	1646.8465	1646.8338	7.74	0	61	202938	1	8112
	R.CEAEVPDVSFLLLR.A	U	1		549.9562	1646.8469	1646.8338	7.96	0	(40)	-133074	1	8113
	R.LEGEDQFLEVAEAPEATQATFPVHR.A	U	1		1392.6826	2783.3507	2783.3402	3.76	0	(7)	-23287.9	1	13881
	R.LEGEDQFLEVAEAPEATQATFPVHR.A	U	1		696.8464	2783.3564	2783.3402	5.80	0	(68)	-226226	1	13882
	R.LEGEDQFLEVAEAPEATQATFPVHR.A	U	2		928.7933	2783.3582	2783.3402	6.44	0	118	392568	1	13885
A6QPP2	SERPIND1 protein OS=Bos taurus GN=SERPIND1 PE=2 SV=1	55457	652	40(24)	16(12)	1.24	26%	A6QPP2_uniprot		0.00072128	2.39959	-0.134	6.37
	Peptide	Unique	Matches	Modification	Observed	Mr(expt)	Mr(calc)	ppm	Miss	Score	#VALUE!	Rank	Query
	K.VPMMQTK.G	U	1		417.7160	833.4175	833.4139	4.30	0	31	103132	1	606
	R.IVIDLFK.H	U	3		424.2708	846.5269	846.5215	6.45	0	55	182977	1	779
	R.NFGYTLR.S	U	1		435.7304	869.4463	869.4395	7.73	0	42	139728	1	869
	R.TREVLLPK.F	U	2		478.3027	954.5908	954.5862	4.81	1	17	56556.4	1	1325
	R.LNEREVVK.V	U	1		493.7872	985.5598	985.5556	4.23	1	17	56556.4	1	1547
	K.DYDLVGALR.A	U	2		511.2734	1020.5322	1020.5240	8.04	0	41	136401	1	1801
	R.SVSDLYVQK.Q	U	2		519.7790	1037.5434	1037.5393	3.96	0	33	109786	1	1928
	K->.<-QLPVLDDFK.T	U	1	Gln->pyro-Glu (N-term Q)	529.2842	1056.5538	1056.5492	4.38	0	14	46575.9	1	2093
	R.TSCLLFLGR.V	U	3		533.7929	1065.5711	1065.5641	6.61	0	47	156362	1	2182
	R.EYYFAEVR.A	U	3		538.7592	1075.5039	1075.4974	6.00	0	33	109786	1	2204
	R.EVVKVPMMQTK.G	U	1		645.3550	1288.6955	1288.6883	5.60	1	48	159689	1	4446
	K.LEKDYDLVGALR.A	U	1		696.3853	1390.7559	1390.7456	7.44	1	9	29941.6	1	5548
	K.TLESQLTPQAVER.W	U	4		736.3954	1470.7762	1470.7678	5.73	0	68	226226	1	6423
	K.TLESQLTPQAVER.W	U	2		491.2667	1470.7782	1470.7678	7.09	0	(36)	-119767	1	6425
	K->.<-QLPVLDDFKTQVR.E	U	1	Gln->pyro-Glu (N-term Q)	771.4271	1540.8396	1540.8250	9.48	1	(1)	-3326.85	1	7059
	K.QLPVLDDFKTQVR.E	U	3		779.9356	1557.8567	1557.8515	3.32	1	48	159689	1	7227
	R.AADFSDPAFLAHTNR.H	U	3		544.9332	1631.7777	1631.7692	5.19	0	(64)	-212918	1	7955
	R.AADFSDPAFLAHTNR.H	U	3		816.8967	1631.7789	1631.7692	5.94	0	77	256167	1	7956
	K.GAFLAASDQELDCDVLR.L	U	1		627.3024	1878.8855	1878.8782	3.88	0	(3)	-9980.55	1	9538
	K.GAFLAASDQELDCDVLR.L	U	2		940.4512	1878.8878	1878.8782	5.12	0	99	329358	1	9539
K4JDR8	Alpha-2-macroglobulin variant 5 OS=Bos taurus GN=A2M PE=2 SV=1	45388	642	34(24)	10(10)	1.32	25%	K4JDR8_uniprot		0.000749097	2.49213	-0.125	7.08
	Peptide	Unique	Matches	Modification	Observed	Mr(expt)	Mr(calc)	ppm	Miss	Score	#VALUE!	Rank	Query
	K.YNILPK.K		4		374.2256	746.4366	746.4326	5.25	0	31	103132	1	108
	R.DLKPAIVK.V		3		442.2868	882.5590	882.5538	5.84	0	37	123093	1	977
	K.FQVENSNR.L		1		497.2424	992.4703	992.4675	2.78	0	33	109786	1	1601
	R.YGAATFTSAR.K		4		522.7622	1043.5097	1043.5036	5.89	0	66	219572	1	1944
	R.VLTEDIYQPR.A		5		617.3301	1232.6457	1232.6401	4.57	0	69	229553	1	3819
	R.VLTEDIYQPR.A		1		411.8896	1232.6470	1232.6401	5.63	0	(19)	-63210.1	1	3820
	R.NALFCLDSAWK.S		3		662.8254	1323.6363	1323.6281	6.18	0	56	186304	1	4922
	R.TEVLTSLYEEAVK.E		2		741.3942	1480.7738	1480.7661	5.21	0	73	242860	1	6529
	R.RTEVLTSLYEEAVK.E		2		819.4455	1636.8764	1636.8672	5.67	1	80	266148	1	8023
	R.RTEVLTSLYEEAVK.E		2		546.6332	1636.8779	1636.8672	6.55	1	(53)	-176323	1	8024
	R.TEVSNNHVLIYLDK.V		2		548.9600	1643.8582	1643.8519	3.87	0	(28)	-93151.8	1	8087
	R.TEVSNNHVLIYLDK.V		2		822.9378	1643.8611	1643.8519	5.60	0	67	222899	1	8088
	K.KDEFPFALEVQTLPQTCDGPK.A		3		807.4037	2419.1894	2419.1730	6.80	1	39	129747	1	12531
P50448	Factor XIIa inhibitor OS=Bos taurus PE=1 SV=1	51919	543	43(28)	11(9)		16%	P50448_uniprot			0
	Peptide	Unique	Matches	Modification	Observed	Mr(expt)	Mr(calc)	ppm	Miss	Score	#VALUE!	Rank	Query
	K.IAFDKGR.T	U	2		403.7311	805.4477	805.4446	3.78	1	42	139728	1	455
	K.FPVF->M<-GR.V	U	4	Oxidation (M)	435.2231	868.4316	868.4266	5.81	0	14	46575.9	1	858
	K.DTFAEASQR.L	U	2		512.7415	1023.4684	1023.4621	6.10	0	41	136401	1	1831
	K.YPVASFTDR.T	U	3		528.2658	1054.5171	1054.5084	8.26	0	47	156362	1	2069
	R.TSTKPFHLK.S	U	1		353.5396	1057.5970	1057.5920	4.71	0	(18)	-59883.3	1	2105
	R.TSTKPFHLK.S	U	2		529.8058	1057.5971	1057.5920	4.84	0	31	103132	1	2106
	R.LYQDFSVLK.K	U	6		556.8061	1111.5976	1111.5914	5.64	0	47	156362	1	2531
	R.LLDSLPEDTR.L	U	2		579.8070	1157.5995	1157.5928	5.76	0	57	189630	1	2990
	K.KYPVASFTDR.T	U	4		592.3112	1182.6078	1182.6033	3.76	1	(40)	-133074	1	3336
	K.KYPVASFTDR.T	U	6		395.2104	1182.6093	1182.6033	5.09	1	44	146381	1	3340
	R.LYQDFSVLKK.R	U	1		620.8528	1239.6910	1239.6863	3.79	1	16	53229.6	1	3897
	R.RLLDSLPEDTR.L	U	2		438.9073	1313.7001	1313.6939	4.74	1	(39)	-129747	1	4795
	R.RLLDSLPEDTR.L	U	3		657.8577	1313.7009	1313.6939	5.33	1	46	153035	1	4797
	R.SAEAVLGEALTDFSLR.L	U	2		839.9402	1677.8658	1677.8573	5.06	0	79	262821	1	8338
	R.SAEAVLGEALTDFSLR.L	U	3		560.2965	1677.8677	1677.8573	6.17	0	(72)	-239533	1	8339
Q3MHN2	Complement component C9 OS=Bos taurus GN=C9 PE=2 SV=1	63327	539	40(21)	20(13)	1.13	29%	Q3MHN2_uniprot		0.000631642	2.10138	-0.487	5.66
	Peptide	Unique	Matches	Modification	Observed	Mr(expt)	Mr(calc)	ppm	Miss	Score	Expect	Rank	Query
	K.MKDAHLK.K	U	1		421.7330	841.4514	841.4480	4.12	1	31	0.01	1	647
	R.LLSSYSAK.Q	U	1		434.7439	867.4733	867.4702	3.64	0	55	4.9e-005	1	851
	K.YATELKEK.L	U	1		491.2693	980.5240	980.5178	6.27	1	66	4e-006	1	1503
	R.VVEESELAR.T	U	1		516.2737	1030.5328	1030.5295	3.24	0	51	0.00019	1	1893
	K.YTPVEAIEK.N	U	3		525.2818	1048.5490	1048.5441	4.76	0	32	0.015	1	2002
	R.KYATELKEK.L	U	2		555.3168	1108.6191	1108.6128	5.71	2	18	0.26	1	2497
	K.DIELRDVQR.C	U	1		381.8774	1142.6105	1142.6044	5.36	1	3	9.6	2	2887
	R.QGTPLPIDCR.M	U	2		578.7953	1155.5760	1155.5706	4.66	0	60	1.9e-005	1	2951
	K.SMEQKDIELR.D	U	1		416.8823	1247.6252	1247.6180	5.83	1	23	0.13	1	3966
	K.VGVEVTGNFDSK.L	U	2		626.3192	1250.6239	1250.6143	7.65	0	3	11	1	4010
	R.LLSSYSAKQEK.M	U	1		627.3433	1252.6720	1252.6663	4.54	1	14	0.61	1	4054
	R.LLSSYSAKQEK.M	U	1		418.5656	1252.6751	1252.6663	7.04	1	(12)	1.2	1	4055
	K.LVPIYDLIPVK.M	U	1		635.4008	1268.7870	1268.7744	9.91	0	20	0.048	1	4262
	R.NRVVEESELAR.T	U	2		651.3464	1300.6783	1300.6735	3.72	1	50	0.00022	1	4596
	R.NRVVEESELAR.T	U	1		434.5680	1300.6821	1300.6735	6.58	1	(38)	0.0037	1	4598
	R.FTYSKDDIYR.L	U	2		654.3200	1306.6255	1306.6194	4.68	1	50	0.00015	1	4716
	R.VWDGNTLTYYR.R	U	3		694.3405	1386.6663	1386.6568	6.87	0	61	1.4e-005	1	5475
	R.AIEDYINEFSVR.K	U	2		728.3635	1454.7124	1454.7041	5.66	0	78	2.5e-007	1	6220
	R.TENHEESIQILR.T	U	3		734.8782	1467.7419	1467.7317	6.93	0	62	1.5e-005	1	6378
	R.TENHEESIQILR.T	U	3		490.2549	1467.7428	1467.7317	7.55	0	(52)	0.00013	1	6379
	R.AIEDYINEFSVRK.C	U	1		792.4119	1582.8092	1582.7991	6.38	1	(0)	21	1	7474
	R.AIEDYINEFSVRK.C	U	1		528.6108	1582.8105	1582.7991	7.22	1	3	11	1	7476
	K.SMEQKDIELRDVQR.C	U	1		437.4778	1745.8820	1745.8730	5.16	2	33	0.011	1	8764
	K.GMGQTETNPEADLFDDVITFIR.G	U	1		1235.0933	2468.1720	2468.1530	7.70	0	(3)	7.8	1	12678
	K.GMGQTETNPEADLFDDVITFIR.G	U	1		823.7321	2468.1744	2468.1530	8.66	0	(5)	4.8	1	12679
	K.G->M<-GQTETNPEADLFDDVITFIR.G	U	1	Oxidation (M)	829.0646	2484.1719	2484.1479	9.67	0	7	3	1	12743
F1MJK3	Uncharacterized protein OS=Bos taurus GN=LOC506828 PE=4 SV=2	166989	533	62(32)	26(16)		17%	F1MJK3_uniprot
	Peptide	Unique	Matches	Modification	Observed	Mr(expt)	Mr(calc)	ppm	Miss	Score	Expect	Rank	Query
	R.YNILPK.K		4		374.2256	746.4366	746.4326	5.25	0	31	0.019	1	108
	K.FEVQVK.M	U	3		375.2146	748.4147	748.4119	3.70	0	33	0.008	1	121
	R.GEAFTLK.A		3		383.2125	764.4104	764.4068	4.69	0	36	0.0055	1	204
	K.YGAATFIK.G	U	2		435.7421	869.4696	869.4647	5.63	0	29	0.017	1	871
	K.IFSMGYR.G	U	1		437.2207	872.4269	872.4214	6.26	0	24	0.058	1	892
	K.VKETIRK.Y	U	1		437.2813	872.5480	872.5443	4.22	2	21	0.094	1	895
	K.NLKPATIK.A	U	1		442.7839	883.5533	883.5491	4.75	0	29	0.0097	1	981
	K.MVSGFIPVK.S	U	1		489.2813	976.5481	976.5416	6.71	0	17	0.39	1	1473
	R.TVSWAVTPK.S	U	3		494.7804	987.5462	987.5389	7.40	0	39	0.0039	1	1561
	R.NLLTDLEAK.N	U	3		508.7879	1015.5612	1015.5549	6.15	0	46	0.00056	1	1759
	R.SGSLLNNAIK.G	U	1		508.7928	1015.5711	1015.5662	4.89	0	41	0.0016	1	1760
	R.NALFCLER.A	U	3		511.7605	1021.5065	1021.5015	4.92	0	47	0.00043	1	1807
	K.LQEMAQIQR.T	U	1		558.7983	1115.5821	1115.5757	5.76	0	36	0.0073	1	2574
	K.LPSNVVEGSAR.A	U	2		564.8072	1127.5998	1127.5935	5.63	0	60	2.4e-005	1	2718
	K.YGAATFIKGEK.A	U	1		395.5512	1183.6316	1183.6237	6.69	1	20	0.15	1	3350
	K.RNELLESLHK.E	U	3		413.5681	1237.6825	1237.6778	3.79	1	21	0.11	1	3875
	K.RNELLESLHK.E	U	2		619.8492	1237.6838	1237.6778	4.82	1	(15)	0.42	1	3876
	R.KLQEMAQIQR.T	U	2		622.8470	1243.6794	1243.6707	7.04	1	69	3e-006	1	3924
	R.KLQEMAQIQR.T	U	2		415.5672	1243.6798	1243.6707	7.33	1	(30)	0.025	1	3925
	R.KLQE->M<-AQIQR.T	U	1	Oxidation (M)	630.8420	1259.6694	1259.6656	3.04	1	(5)	9.9	1	4124
	R.KLQE->M<-AQIQR.T	U	1	Oxidation (M)	420.8996	1259.6771	1259.6656	9.12	1	(33)	0.013	1	4125
	K.ITAAPYSLCGLR.A	U	1		661.3547	1320.6948	1320.6860	6.68	0	5	7.9	1	4901
	R.SQGNTWLTAFVLK.S	U	1		732.9004	1463.7863	1463.7773	6.20	0	3	8.3	1	6327
	R.KPQEVNELYSPHR.A	U	2		532.9451	1595.8136	1595.8056	5.01	0	36	0.0052	1	7628
	K.HSDGSYSTFGDRDGR.S	U	2		552.9076	1655.7009	1655.6924	5.13	1	23	0.012	1	8153
	K.HSDGSYSTFGDRDGR.S	U	1		828.8578	1655.7011	1655.6924	5.26	1	(5)	0.83	1	8154
	R.IEHSFEVDEYVLPK.F	U	2		852.9329	1703.8513	1703.8406	6.25	0	52	0.00016	1	8502
	R.IEHSFEVDEYVLPK.F	U	2		568.9581	1703.8526	1703.8406	7.00	0	(51)	0.00019	1	8504
	K.SYIQLEPVADTVICGK.T	U	1		896.9679	1791.9212	1791.9077	7.57	0	15	0.73	1	9013
	K.SYIQLEPVADTVICGK.T	U	1		598.3149	1791.9230	1791.9077	8.54	0	(2)	13	1	9014
	K.SAGTFSEEFQVDEAKR.L	U	3		600.9547	1799.8421	1799.8326	5.29	1	(86)	3.3e-008	1	9061
	K.SAGTFSEEFQVDEAKR.L	U	2		900.9286	1799.8427	1799.8326	5.64	1	94	4.8e-009	1	9064
	K.RIEHSFEVDEYVLPK.F	U	2		620.9928	1859.9566	1859.9417	7.97	1	5	7	1	9382
	K.VREEGTGLELTGHGSSEITNTLSK.L	U	1		629.5768	2514.2783	2514.2562	8.79	1	3	9.6	1	12844
										SUM
										0.0300585
*	Normalized spectral count (NSpC) values were calculated for each protein hit according to eq 1 (SI).
**	GRAVY represents Grand average of hydropathicity. Data were collected from ExPASy database.
***	PI represents isoelectric point. Data were collected from ExPASy database.

## Sheet: VC-RGO
Accession	Description	Mass	Score	Matches	Sequences	emPAI	Coverage			SpCi*	NpSpC*	GRAVY**	PI***
Q7SIH1	Alpha-2-macroglobulin OS=Bos taurus GN=A2M PE=1 SV=2	168953	9060	489(351)	78(71)	7.05	61%	Q7SIH1_uniprot		0.0028943	4.94621	-0.19	5.71
	Peptide	Unique	Matches	Modification	Observed	Mr(expt)	Mr(calc)	ppm	Miss	Score	#VALUE!	Rank	Query
	R.GIPFTGK.V		4		360.2100	718.4055	718.4014	5.72	0	29	49559.6	1	35
	K.GTSLSIR.V		2		367.2158	732.4170	732.4130	5.43	0	30	51268.6	1	75
	K.GVPMPNK.V		1		371.7007	741.3868	741.3843	3.33	0	19	32470.1	1	89
	K.VLLVDGK.G		3		372.2387	742.4629	742.4589	5.35	0	42	71776	1	91
	K.YNILPK.K		5		374.2260	746.4375	746.4326	6.46	0	42	71776	1	109
	R.GEAFTLK.A		4		383.2127	764.4108	764.4068	5.18	0	39	66649.1	1	184
	K.FEVQVR.M		3		389.2189	776.4232	776.4181	6.56	0	46	78611.8	1	227
	K.IFQLKR.Q	U	1		402.7601	803.5056	803.5017	4.79	1	26	44432.8	1	389
	R.QEFEMK.I		1		406.1888	810.3631	810.3582	6.04	0	6	10253.7	2	423
	K.AGALCLSR.D		4		424.2296	846.4445	846.4382	7.55	0	61	104246	1	635
	K.VSESLSLK.L	U	3		431.7498	861.4850	861.4807	4.92	0	38	64940.2	1	688
	R.RGIPFTGK.V		2		438.2606	874.5067	874.5025	4.80	1	60	102537	1	781
	R.DLKPAIVK.V		4		442.2871	882.5597	882.5538	6.68	0	35	59813.3	1	851
	K.GQVLKDLK.E		1		450.7824	899.5501	899.5440	6.83	1	33	56395.4	1	906
	R.VTMNMCR.K		2		456.2004	910.3863	910.3823	4.41	0	39	66649.1	1	962
	K.RQEFEMK.I		2		484.2389	966.4632	966.4593	4.03	1	42	71776	1	1282
	K.IKGTSLSIR.V		2		487.8065	973.5984	973.5920	6.59	1	29	49559.6	1	1331
	K.RQEFE->M<-K.I		3	Oxidation (M)	492.2372	982.4599	982.4542	5.84	1	(8)	-13671.6	1	1399
	K.FQVENSNR.L		1		497.2426	992.4707	992.4675	3.15	0	55	93992.4	1	1481
	K.ATVLNYLPK.C		5		509.8037	1017.5928	1017.5859	6.83	0	38	64940.2	1	1703
	R.YGAATFTSAR.K		6		522.7631	1043.5117	1043.5036	7.75	0	61	104246	1	1903
	R->.<-QTVSWAVTPK.S		3	Gln->pyro-Glu (N-term Q)	550.2968	1098.5791	1098.5710	7.36	0	(46)	-78611.8	1	2427
	R.SLFTDVVAEK.D		5		554.8014	1107.5882	1107.5812	6.35	0	64	109373	1	2511
	R.QTVSWAVTPK.S		9		558.8098	1115.6051	1115.5975	6.77	0	63	107664	1	2610
	R.STGTLLNNAIK.G	U	5		566.3262	1130.6379	1130.6295	7.42	0	48	82029.7	1	2804
	K.GATEITTTITK.L		6		568.3167	1134.6189	1134.6132	4.98	0	62	105955	1	2838
	K.LPPNVVEESAR.A	U	9		605.8292	1209.6438	1209.6353	6.98	0	71	121336	1	3783
	R.LLTEDIYQPR.A	U	5		624.3386	1246.6627	1246.6557	5.58	0	82	140134	1	4212
	R.LLTEDIYQPR.A	U	2		416.5617	1246.6632	1246.6557	6.00	0	(36)	-61522.3	1	4214
	K.LSFVTVDSNLR.R		1		417.5643	1249.6711	1249.6667	3.53	0	(30)	-51268.6	1	4261
	K.LSFVTVDSNLR.R		9		625.8439	1249.6732	1249.6667	5.23	0	60	102537	1	4264
	R.YEIEHCLANK.V	U	2		638.8071	1275.5997	1275.5917	6.25	0	68	116209	1	4584
	R.YEIEHCLANK.V	U	3		426.2075	1275.6007	1275.5917	7.05	0	(28)	-47850.7	1	4585
	R.DTGLGLSPTASLR.V		9		644.3530	1286.6914	1286.6830	6.50	0	66	112791	1	4721
	K.TQTVQAHYVLK.G		3		644.3597	1286.7048	1286.6983	5.07	0	60	102537	1	4731
	K.TQTVQAHYVLK.G		2		429.9090	1286.7052	1286.6983	5.35	0	(21)	-35888	1	4733
	R.VTASPQSLCALR.A		2		651.8483	1301.6821	1301.6762	4.57	0	82	140134	1	4924
	R.NALFCLDSAWK.S		7		662.8244	1323.6342	1323.6281	4.61	0	75	128171	1	5273
	R.NALFCLDSAWK.S		1		442.2191	1323.6354	1323.6281	5.51	0	(12)	-20507.4	1	5276
	R.IQHHTLLASPVR.A		3		686.3997	1370.7848	1370.7783	4.75	0	(47)	-80320.7	1	5746
	R.IQHHTLLASPVR.A		4		457.9363	1370.7872	1370.7783	6.52	0	50	85447.6	1	5751
	K.LSFVTVDSNLRR.G		4		469.5989	1405.7747	1405.7678	4.95	1	41	70067	1	6168
	K.LSFVTVDSNLRR.G		3		703.8949	1405.7752	1405.7678	5.33	1	(25)	-42723.8	1	6169
	K.MVSGFIPLKPTVK.M		3		708.9213	1415.8281	1415.8210	4.99	0	(35)	-59813.3	1	6270
	K.MVSGFIPLKPTVK.M		2		472.9501	1415.8286	1415.8210	5.31	0	(26)	-44432.8	1	6272
	R.SNSFVYLEPLPR.E		2		474.5877	1420.7411	1420.7350	4.28	0	60	102537	1	6358
	R.SNSFVYLEPLPR.E		5		711.3787	1420.7429	1420.7350	5.52	0	(58)	-99119.2	1	6362
	K.IQEEGTEVELTGK.G		1		478.2458	1431.7156	1431.7093	4.43	0	(23)	-39305.9	1	6467
	K.IQEEGTEVELTGK.G		9		716.8666	1431.7186	1431.7093	6.51	0	77	131589	1	6477
	K.->M<-VSGFIPLKPTVK.M		4	Oxidation (M)	716.9198	1431.8250	1431.8160	6.34	0	42	71776	1	6484
	K.->M<-VSGFIPLKPTVK.M		2	Oxidation (M)	478.2828	1431.8266	1431.8160	7.43	0	(19)	-32470.1	1	6485
	K.DMYSFLQDMGLK.A		2		724.3398	1446.6650	1446.6523	8.78	0	(72)	-123045	1	6660
	K.DMYSFLQD->M<-GLK.A		2	Oxidation (M)	732.3345	1462.6545	1462.6472	4.97	0	(45)	-76902.8	1	6864
	K.D->M<-YSFLQDMGLK.A		3	Oxidation (M)	732.3354	1462.6562	1462.6472	6.15	0	72	123045	1	6865
	R.TEVLTSLYEEAVK.E		3		741.3932	1480.7719	1480.7661	3.97	0	74	126462	1	7149
	R.TEVLTSLYEEAVK.E		2		494.5986	1480.7741	1480.7661	5.40	0	(19)	-32470.1	1	7150
	K.EQETYCICGNGR.Q		1		743.8103	1485.6060	1485.5977	5.65	0	50	85447.6	1	7187
	K.DLFHCVSFTLPR.S		2		497.9211	1490.7414	1490.7340	4.95	0	38	64940.2	1	7231
	R.ASFSVLGDILGSAMR.N	U	1		508.6060	1522.7961	1522.7814	9.71	0	(31)	-52977.5	1	7538
	R.ASFSVLGDILGSAMR.N	U	1		762.4055	1522.7965	1522.7814	9.94	0	(64)	-109373	1	7539
	K.HFDGSYSTFGEHR.G	U	8		770.3379	1538.6613	1538.6539	4.86	0	89	152097	1	7666
	K.HFDGSYSTFGEHR.G	U	9		513.8944	1538.6614	1538.6539	4.90	0	(52)	-88865.5	1	7667
	R.ASFSVLGDILGSA->M<-R.N	U	1	Oxidation (M)	513.9353	1538.7841	1538.7763	5.07	0	(2)	-3417.9	1	7695
	R.ASFSVLGDILGSA->M<-R.N	U	1	Oxidation (M)	770.3998	1538.7850	1538.7763	5.67	0	65	111082	1	7696
	K.ALLAYAFALAGNQER.R		1		804.4346	1606.8547	1606.8467	4.99	0	96	164059	1	8451
	R.GNSEGNTWLTAFVLK.S	U	2		818.9244	1635.8343	1635.8257	5.29	0	88	150388	1	8726
	R.GNSEGNTWLTAFVLK.S	U	1		546.2862	1635.8367	1635.8257	6.77	0	(45)	-76902.8	1	8727
	R.RTEVLTSLYEEAVK.E		3		819.4464	1636.8781	1636.8672	6.71	1	80	136716	1	8745
	R.RTEVLTSLYEEAVK.E		3		546.6334	1636.8784	1636.8672	6.88	1	(59)	-100828	1	8747
	R.TEVSNNHVLIYLDK.V		3		822.9370	1643.8593	1643.8519	4.55	0	80	136716	1	8824
	R.TEVSNNHVLIYLDK.V		2		548.9612	1643.8617	1643.8519	5.99	0	(35)	-59813.3	1	8825
	R.SPTSQEVMFLTIQVK.G		3		854.4581	1706.9016	1706.8913	6.02	0	(57)	-97410.3	1	9373
	R.SPTSQEVMFLTIQVK.G		2		569.9746	1706.9020	1706.8913	6.26	0	(6)	-10253.7	1	9374
	R.SPTSQEV->M<-FLTIQVK.G		3	Oxidation (M)	862.4545	1722.8944	1722.8862	4.74	0	98	167477	1	9507
	K.EDNTIHWTRPQKPR.L		3		593.3108	1776.9107	1776.9019	4.94	0	22	37596.9	1	9831
	K.EDNTIHWTRPQKPR.L		2		889.4632	1776.9118	1776.9019	5.57	0	(12)	-20507.4	1	9835
	R.VSVQLEASPAFLAVPEK.E		2		892.9982	1783.9819	1783.9720	5.56	0	51	87156.6	1	9876
	K.DTIIKPLLVEPEGLEK.E	U	4		897.5215	1793.0284	1793.0186	5.48	0	64	109373	1	9932
	K.DTIIKPLLVEPEGLEK.E	U	3		598.6838	1793.0295	1793.0186	6.09	0	(41)	-70067	1	9934
	R.NPSNCYGEESNAVCEK.F		2		929.3733	1856.7320	1856.7305	0.82	0	93	158933	1	10384
	R.LLIYAILPDGEVVGDSAR.Y		16		951.0292	1900.0438	1900.0306	6.96	0	(64)	-109373	1	10761
	R.LLIYAILPDGEVVGDSAR.Y		4		634.3560	1900.0461	1900.0306	8.15	0	64	109373	1	10766
	R.KDTIIKPLLVEPEGLEK.E	U	5		641.3809	1921.1208	1921.1135	3.75	1	(61)	-104246	1	10945
	R.KDTIIKPLLVEPEGLEK.E	U	3		961.5679	1921.1213	1921.1135	4.04	1	69	117918	1	10946
	R.KDTIIKPLLVEPEGLEK.E	U	2		481.2881	1921.1231	1921.1135	4.99	1	(44)	-75193.9	1	10950
	R.DFVHFDDTSEPPTETVR.K		8		664.6417	1990.9033	1990.8909	6.25	0	(50)	-85447.6	1	11497
	R.DFVHFDDTSEPPTETVR.K		9		996.4595	1990.9044	1990.8909	6.78	0	91	155515	1	11498
	K.GSGGTAEHPFTVEEFVLPK.F		4		1001.5069	2000.9992	2000.9844	7.43	0	50	85447.6	1	11585
	K.GSGGTAEHPFTVEEFVLPK.F		4		668.0073	2001.0000	2000.9844	7.78	0	(44)	-75193.9	1	11587
	K.VGLNFSPGQSFPASQAHLR.V		2		1007.0245	2012.0345	2012.0228	5.82	0	(22)	-37596.9	1	11642
	K.VGLNFSPGQSFPASQAHLR.V		3		671.6857	2012.0352	2012.0228	6.15	0	90	153806	1	11643
	K.VSESLSLKLPPNVVEESAR.A	U	15		1027.5660	2053.1175	2053.1055	5.86	1	(59)	-100828	1	11980
	K.VSESLSLKLPPNVVEESAR.A	U	6		685.3808	2053.1206	2053.1055	7.34	1	69	117918	1	11989
	K.FSGELNNEGCFSQQVNTK.I	U	5		1029.9684	2057.9222	2057.9113	5.32	0	104	177731	1	12019
	K.FSGELNNEGCFSQQVNTK.I	U	1		686.9821	2057.9245	2057.9113	6.44	0	(58)	-99119.2	1	12021
	R.DFVHFDDTSEPPTETVRK.Y		4		707.3362	2118.9867	2118.9858	0.41	1	(25)	-42723.8	1	12421
	R.DFVHFDDTSEPPTETVRK.Y		2		530.7562	2118.9958	2118.9858	4.71	1	(24)	-41014.8	1	12422
	R.DFVHFDDTSEPPTETVRK.Y		1		1060.5062	2118.9979	2118.9858	5.70	1	33	56395.4	1	12424
	K.YRNPSNCYGEESNAVCEK.F		1		726.3102	2175.9089	2175.8949	6.42	1	54	92283.4	1	12779
	K.YRNPSNCYGEESNAVCEK.F		1		1088.9624	2175.9102	2175.8949	7.04	1	(2)	-3417.9	1	12780
	R.NTQNLLQMPYGCGEQNMAR.F	U	2		1113.0061	2223.9976	2223.9823	6.89	0	59	100828	1	13024
	R.NTQNLLQMPYGCGEQN->M<-AR.F	U	1	Oxidation (M)	747.6727	2239.9962	2239.9772	8.46	0	(13)	-22216.4	1	13128
	R.NTQNLLQ->M<-PYGCGEQN->M<-AR.F	U	1	2 Oxidation (M)	753.0037	2255.9893	2255.9722	7.61	0	(1)	-1708.95	1	13276
	R.NRDFVHFDDTSEPPTETVR.K		7		1131.5316	2261.0487	2261.0349	6.09	1	(62)	-105955	1	13334
	R.NRDFVHFDDTSEPPTETVR.K		7		566.2700	2261.0510	2261.0349	7.10	1	(35)	-59813.3	1	13342
	R.NRDFVHFDDTSEPPTETVR.K		8		754.6911	2261.0515	2261.0349	7.32	1	87	148679	1	13343
	R.HFPPAAATDTAADAHDPARPGAK.V	U	21		572.0345	2284.1091	2284.0985	4.65	0	72	123045	1	13518
	R.HFPPAAATDTAADAHDPARPGAK.V	U	3		1143.0625	2284.1104	2284.0985	5.24	0	(15)	-25634.3	1	13528
	R.HFPPAAATDTAADAHDPARPGAK.V	U	19		762.3784	2284.1133	2284.0985	6.47	0	(65)	-111082	1	13543
	R.NRDFVHFDDTSEPPTETVRK.Y		1		1195.5780	2389.1414	2389.1299	4.85	2	(11)	-18798.5	1	14173
	R.NRDFVHFDDTSEPPTETVRK.Y		8		797.3882	2389.1429	2389.1299	5.45	2	68	116209	1	14177
	R.NRDFVHFDDTSEPPTETVRK.Y		3		478.8360	2389.1435	2389.1299	5.69	2	(11)	-18798.5	1	14179
	R.NRDFVHFDDTSEPPTETVRK.Y		7		598.2936	2389.1455	2389.1299	6.52	2	(34)	-58104.4	1	14183
	K.KDEFPFALEVQTLPQTCDGPK.A		1		1210.5969	2419.1793	2419.1730	2.61	1	(41)	-70067	1	14345
	K.KDEFPFALEVQTLPQTCDGPK.A		5		807.4028	2419.1865	2419.1730	5.58	1	74	126462	1	14346
	K.QQNCQGGFSSTQDTVVALHALSR.Y		4		835.4094	2503.2063	2503.1874	7.53	0	100	170895	1	14746
	K.VYDYYETDEFAVAEYSAPCSK.D		2		836.3595	2506.0567	2506.0522	1.78	0	10	17089.5	1	14754
	K.IQEEGTEVELTGKGATEITTTITK.L		1		850.4520	2548.3341	2548.3120	8.68	1	33	56395.4	1	15040
	K.NEESLVFVQTDKPIYKPEQTVK.F		2		1296.6882	2591.3619	2591.3483	5.26	0	59	100828	1	15194
	K.NEESLVFVQTDKPIYKPEQTVK.F		4		648.8481	2591.3635	2591.3483	5.86	0	(48)	-82029.7	1	15197
	K.NEESLVFVQTDKPIYKPEQTVK.F		6		864.7952	2591.3637	2591.3483	5.95	0	(48)	-82029.7	1	15198
	R.IVLLDESFHPLNELVPLVYVEDPK.G		1		926.8451	2777.5134	2777.4891	8.76	0	(22)	-37596.9	1	15970
	R.IVLLDESFHPLNELVPLVYVEDPK.G		1		1389.7672	2777.5199	2777.4891	11.1	0	40	68358.1	1	15971
	R.IVLLDESFHPLNELVPLVYVEDPK.G		1		695.3884	2777.5244	2777.4891	12.7	0	(6)	-10253.7	1	15972
	R.AEMGRNRDFVHFDDTSEPPTETVR.K		1		562.0646	2805.2865	2805.2777	3.16	2	2	3417.9	1	16091
	R.AVDQSVLLMRPEAELSAATVYNLLPVK.D		1		976.5431	2926.6076	2926.5837	8.16	0	27	46141.7	1	16395
	K.EVIFNSLLCPSVDFVFLGAEDGGQVLR.H	U	2		994.5161	2980.5265	2980.5005	8.73	0	9	15380.6	1	16493
	R.IVLLDESFHPLNELVPLVYVEDPKGNR.I		1		1035.8975	3104.6706	3104.6546	5.13	1	47	80320.7	1	16666
	R.SGTHTLPVEQGDMQGHFSMSVPVESDIAPVAR.L		1		845.6611	3378.6152	3378.5973	5.29	0	(24)	-41014.8	1	17279
	R.SGTHTLPVEQGDMQGHFSMSVPVESDIAPVAR.L		2		1127.2129	3378.6168	3378.5973	5.78	0	(43)	-73484.9	1	17280
	R.SGTHTLPVEQGD->M<-QGHFSMSVPVESDIAPVAR.L		1	Oxidation (M)	1132.5427	3394.6063	3394.5922	4.16	0	47	80320.7	1	17316
	R.SGTHTLPVEQGDMQGHFS->M<-SVPVESDIAPVAR.L		2	Oxidation (M)	849.6599	3394.6103	3394.5922	5.32	0	(45)	-76902.8	1	17317
	R.SGTHTLPVEQGD->M<-QGHFSMSVPVESDIAPVAR.L		1	Oxidation (M)	849.6605	3394.6127	3394.5922	6.04	0	(33)	-56395.4	1	17318
	R.SGTHTLPVEQGDMQGHFS->M<-SVPVESDIAPVAR.L		2	Oxidation (M)	1132.5457	3394.6151	3394.5922	6.75	0	(16)	-27343.2	1	17320
	R.SGTHTLPVEQGD->M<-QGHFS->M<-SVPVESDIAPVAR.L		1	2 Oxidation (M)	853.6627	3410.6218	3410.5871	10.2	0	(18)	-30761.1	1	17352
	R.IAQWQNLEVENGLQQLTFPLSSEPFQGSYK.V		1		1151.2451	3450.7135	3450.7096	1.15	0	20	34179	1	17417
	K.DLSSFPSSVNQQEEDNEDCISHDNVYINGIMYFPVSNTNEK.D		1		1184.7806	4735.0935	4735.0602	7.01	0	24	41014.8	1	19325
	K.DLSSFPSSVNQQEEDNEDCISHDNVYINGI->M<-YFPVSNTNEK.D		1	Oxidation (M)	1188.7793	4751.0881	4751.0552	6.93	0	(9)	-15380.6	1	19338
Q2UVX4	Complement C3 OS=Bos taurus GN=C3 PE=1 SV=2	188675	8756	514(346)	115(95)	12.09	62%	Q2UVX4_uniprot		0.00272426	4.65563	-0.349	6.41
	Peptide	Unique	Matches	Modification	Observed	Mr(expt)	Mr(calc)	ppm	Miss	Score	#VALUE!	Rank	Query
	K.FISHIK.C	U	1		372.7250	743.4354	743.4330	3.24	0	10	17089.5	1	93
	K.GVFVLNK.K	U	3		388.7393	775.4640	775.4592	6.19	0	36	61522.3	1	224
	K.ISYIIGK.D	U	3		397.2469	792.4792	792.4745	5.94	0	40	68358.1	1	315
	R.VGLVAVDK.G	U	3		400.7499	799.4853	799.4804	6.14	0	58	99119.2	1	361
	K.WLILEK.Q	U	4		401.2492	800.4839	800.4796	5.33	0	38	64940.2	1	369
	R.FYHPDK.E	U	1		403.6966	805.3786	805.3759	3.41	0	22	37596.9	1	398
	R.LPYSVVR.N	U	3		417.2503	832.4861	832.4807	6.47	0	39	66649.1	1	528
	R.SVQLMEK.R	U	2		417.7256	833.4367	833.4317	6.02	0	26	44432.8	1	531
	R.DGALELAR.S	U	2		422.7320	843.4494	843.4450	5.24	0	42	71776	1	589
	R.WLNEQR.Y	U	2		423.2194	844.4242	844.4191	5.97	0	29	49559.6	1	611
	K.DLCETVK.W	U	1		432.7123	863.4101	863.4059	4.86	0	16	27343.2	1	699
	K.LMNVFLK.D	U	3		432.7566	863.4987	863.4939	5.57	0	(37)	-63231.2	1	708
	R.KFISHIK.C	U	2		436.7731	871.5316	871.5280	4.17	1	35	59813.3	1	759
	K.L->M<-NVFLK.D	U	24	Oxidation (M)	440.7544	879.4942	879.4888	6.17	0	39	66649.1	1	818
	K.GVFVLNKK.N	U	3		452.7866	903.5586	903.5542	4.85	1	35	59813.3	1	935
	R.AILYNYR.E	U	3		456.7536	911.4926	911.4865	6.78	0	36	61522.3	1	975
	R.DPLTITVR.T	U	7		457.7717	913.5288	913.5233	6.09	0	34	58104.4	1	994
	K.LSINTQNK.R	U	1		459.2577	916.5009	916.4978	3.47	0	42	71776	1	1007
	K.LEGDRLTK.F	U	1		466.2659	930.5172	930.5134	4.04	1	16	27343.2	3	1052
	R->.<-QESLELIR.K	U	1	Gln->pyro-Glu (N-term Q)	485.7675	969.5205	969.5131	7.63	0	58	99119.2	1	1301
	R.QESLELIR.K	U	2		494.2799	986.5451	986.5396	5.60	0	(53)	-90574.5	1	1435
	R.SVQLMEKR.M	U	1		495.7760	989.5374	989.5328	4.66	1	20	34179	1	1460
	K.AGQYSSDLR.K	U	1		498.7429	995.4713	995.4672	4.10	0	54	92283.4	1	1517
	R.KIWDVVEK.A	U	4		508.7962	1015.5778	1015.5702	7.45	1	50	85447.6	1	1683
	K.IGLHEVEVK.A	U	2		512.2986	1022.5827	1022.5760	6.56	0	35	59813.3	1	1763
	R.ISLTHSLTR.V	U	2		514.3016	1026.5887	1026.5822	6.37	0	50	85447.6	1	1803
	K.RDPLTITVR.T	U	3		357.5507	1069.6304	1069.6244	5.64	1	(33)	-56395.4	1	2152
	K.RDPLTITVR.T	U	3		535.8227	1069.6308	1069.6244	6.02	1	34	58104.4	1	2154
	K.LSINTQNKR.D	U	2		358.5410	1072.6010	1072.5989	2.00	1	(40)	-68358.1	1	2167
	K.LSINTQNKR.D	U	1		537.3085	1072.6025	1072.5989	3.39	1	58	99119.2	1	2168
	K.GYTQQLAFR.Q	U	3		542.2863	1082.5581	1082.5509	6.65	0	57	97410.3	1	2242
	K.LCHKDTCR.C	U	1		363.8371	1088.4896	1088.4855	3.70	1	24	41014.8	1	2318
	K.LCHKDTCR.C	U	1		545.2527	1088.4909	1088.4855	4.97	1	(20)	-34179	1	2319
	K.ADIGCTPGSGR.N	U	1		545.7535	1089.4925	1089.4873	4.78	0	39	66649.1	1	2328
	K.NTLIIYLDK.V	U	1		546.8212	1091.6279	1091.6226	4.83	0	8	13671.6	1	2353
	R->.<-QESLELIRK.G	U	1	Gln->pyro-Glu (N-term Q)	549.8177	1097.6208	1097.6080	11.6	1	(4)	-6835.81	1	2418
	K.DSCMGTLVVK.N	U	2		555.2737	1108.5329	1108.5257	6.54	0	21	35888	1	2529
	R.QESLELIRK.G	U	2		558.3274	1114.6402	1114.6346	5.06	1	49	83738.6	1	2590
	K.AGQYSSDLRK.C	U	1		375.5299	1123.5679	1123.5622	5.11	1	(26)	-44432.8	1	2719
	K.AGQYSSDLRK.C	U	1		562.7914	1123.5682	1123.5622	5.38	1	37	63231.2	1	2720
	K.GSMILDICTK.Y	U	7		569.2900	1136.5654	1136.5570	7.43	0	45	76902.8	1	2879
	K.RQESLELIR.K	U	3		381.8897	1142.6472	1142.6407	5.67	1	(45)	-76902.8	1	2961
	K.RQESLELIR.K	U	2		572.3313	1142.6480	1142.6407	6.40	1	52	88865.5	1	2964
	K.TSQGLETQQR.A	U	1		574.2924	1146.5702	1146.5629	6.33	0	44	75193.9	1	2976
	K.GS->M<-ILDICTK.Y	U	2	Oxidation (M)	577.2873	1152.5601	1152.5519	7.17	0	(38)	-64940.2	1	3016
	R.TKKDNIPEGR.Q	U	3		579.3193	1156.6241	1156.6200	3.56	2	52	88865.5	1	3081
	R.TKKDNIPEGR.Q	U	3		386.5494	1156.6262	1156.6200	5.37	2	(38)	-64940.2	1	3085
	K.DYDTTPPVVR.W	U	3		581.7925	1161.5704	1161.5666	3.26	0	40	68358.1	1	3142
	R.HQQTITIPAR.S	U	3		582.8311	1163.6475	1163.6411	5.54	0	62	105955	1	3176
	R.HQQTITIPAR.S	U	3		388.8905	1163.6497	1163.6411	7.37	0	(37)	-63231.2	1	3179
	R.ILWESASLLR.S	U	3		594.3469	1186.6793	1186.6710	7.01	0	44	75193.9	1	3476
	R->.<-QVLLNGVQPSR.A	U	3	Gln->pyro-Glu (N-term Q)	597.3395	1192.6644	1192.6564	6.69	0	58	99119.2	1	3547
	R.VSIRPAPETVK.K	U	2		598.8561	1195.6976	1195.6925	4.31	0	42	71776	1	3595
	R.VSIRPAPETVK.K	U	2		399.5735	1195.6986	1195.6925	5.10	0	(19)	-32470.1	1	3596
	K.NRWEEPNQK.L	U	2		600.7928	1199.5710	1199.5683	2.28	1	37	63231.2	1	3628
	K.NRWEEPNQK.L	U	1		400.8647	1199.5723	1199.5683	3.36	1	(25)	-42723.8	1	3629
	R.YISKYEMNR.D	U	1		602.2964	1202.5782	1202.5753	2.39	1	37	63231.2	1	3690
	R.YISKYEMNR.D	U	2		401.8669	1202.5788	1202.5753	2.88	1	(27)	-46141.7	1	3691
	R.QVLLNGVQPSR.A	U	4		605.8533	1209.6921	1209.6830	7.56	0	(51)	-87156.6	1	3789
	R.KGYTQQLAFR.Q	U	1		404.5588	1210.6546	1210.6458	7.23	1	25	42723.8	1	3806
	K.EVTLEDRLDK.A	U	2		609.3253	1216.6361	1216.6299	5.08	1	28	47850.7	1	3881
	K.EVTLEDRLDK.A	U	2		406.5527	1216.6362	1216.6299	5.15	1	(17)	-29052.2	1	3882
	K.AGDFLENHYR.E	U	3		611.2897	1220.5648	1220.5574	6.04	0	79	135007	1	3903
	K.AGDFLENHYR.E	U	3		407.8622	1220.5648	1220.5574	6.05	0	(39)	-66649.1	1	3904
	R.YYTYMIMNK.G	U	4		613.7877	1225.5609	1225.5511	7.97	0	64	109373	1	3933
	R.YYTYMI->M<-NK.G	U	5	Oxidation (M)	621.7832	1241.5518	1241.5460	4.68	0	(33)	-56395.4	1	4127
	R.YYTY->M<-IMNK.G	U	2	Oxidation (M)	621.7849	1241.5553	1241.5460	7.44	0	(44)	-75193.9	1	4131
	R.LVAYYTLINAK.G	U	2		634.8702	1267.7258	1267.7176	6.48	0	51	87156.6	1	4489
	K.RQESLELIRK.G	U	1		636.3784	1270.7423	1270.7357	5.19	2	(3)	-5126.86	1	4534
	K.RQESLELIRK.G	U	2		424.5886	1270.7441	1270.7357	6.64	2	34	58104.4	1	4535
	R.KDYDTTPPVVR.W	U	2		645.8415	1289.6684	1289.6616	5.31	1	60	102537	1	4777
	R.KDYDTTPPVVR.W	U	2		430.8975	1289.6706	1289.6616	6.96	1	(39)	-66649.1	1	4780
	K.ACEPGVDYVYK.T	U	2		650.8019	1299.5892	1299.5805	6.67	0	41	70067	1	4884
	K.HHRPGQQITLK.I	U	1		657.8740	1313.7335	1313.7316	1.40	0	(3)	-5126.86	1	5110
	K.HHRPGQQITLK.I	U	4		438.9203	1313.7391	1313.7316	5.70	0	18	30761.1	1	5118
	R.VPINDGNGEAILK.R	U	4		670.3681	1338.7216	1338.7143	5.48	0	78	133298	1	5379
	K.FYYIDDPDGLK.V	U	4		673.3245	1344.6344	1344.6238	7.88	0	50	85447.6	1	5428
	R.EVVADSVWVDVK.D	U	24		673.3579	1344.7013	1344.6926	6.48	0	73	124753	1	5447
	R.AQFILQGDACVK.A	U	1		675.3530	1348.6915	1348.6809	7.85	0	2	3417.9	1	5521
	K.DICEAQVNSLGR.S	U	2		681.3316	1360.6486	1360.6405	5.99	0	58	99119.2	1	5663
	K.SGSDEVQVKQER.K	U	1		454.5624	1360.6655	1360.6583	5.31	1	(54)	-92283.4	1	5664
	K.SGSDEVQVKQER.K	U	1		681.3403	1360.6661	1360.6583	5.76	1	66	112791	1	5665
	K.TIYTPGSTVLYR.V	U	3		685.8739	1369.7332	1369.7242	6.63	0	53	90574.5	1	5740
	R.SSVAVPYVIVPLK.I	U	3		686.4199	1370.8253	1370.8173	5.80	0	53	90574.5	1	5753
	K.AAVYNHFISDGVK.K	U	4		474.2479	1419.7218	1419.7147	5.06	0	(44)	-75193.9	1	6329
	K.AAVYNHFISDGVK.K	U	3		710.8691	1419.7237	1419.7147	6.39	0	83	141843	1	6333
	K.VSHTVEDCLSFK.V	U	3		474.5645	1420.6718	1420.6657	4.30	0	74	126462	1	6346
	K.VSHTVEDCLSFK.V	U	2		711.3432	1420.6718	1420.6657	4.34	0	(48)	-82029.7	1	6347
	K.VFALAANLIAIDSK.D	U	1		723.4267	1444.8388	1444.8289	6.86	0	79	135007	1	6652
	K.EKNRWEEPNQK.L	U	1		729.3622	1456.7099	1456.7058	2.81	2	(6)	-10253.7	1	6795
	K.EKNRWEEPNQK.L	U	1		486.5774	1456.7104	1456.7058	3.15	2	15	25634.3	1	6796
	K.GQGTLSVVTVYHAK.L	U	2		730.4020	1458.7895	1458.7831	4.41	0	60	102537	1	6820
	K.GQGTLSVVTVYHAK.L	U	1		487.2719	1458.7940	1458.7831	7.47	0	(31)	-52977.5	1	6822
	R.NYAGVFTDAGLTLK.T	U	1		490.5956	1468.7651	1468.7562	6.06	0	(41)	-70067	1	6956
	R.NYAGVFTDAGLTLK.T	U	35		735.3914	1468.7682	1468.7562	8.15	0	87	148679	1	6968
	R.VPINDGNGEAILKR.Q	U	4		748.4196	1494.8246	1494.8154	6.12	1	(90)	-153806	1	7287
	R.VPINDGNGEAILKR.Q	U	5		499.2822	1494.8249	1494.8154	6.32	1	92	157224	1	7288
	R.TLNPEHLGQGGVQR.E	U	2		502.6012	1504.7818	1504.7746	4.74	0	(40)	-68358.1	1	7408
	R.TLNPEHLGQGGVQR.E	U	2		753.3988	1504.7830	1504.7746	5.59	0	53	90574.5	1	7409
	R.DSNKNTLIIYLDK.V	U	4		768.9197	1535.8249	1535.8195	3.54	1	81	138425	1	7636
	R.DSNKNTLIIYLDK.V	U	2		512.9491	1535.8255	1535.8195	3.90	1	(54)	-92283.4	1	7637
	K.AAVYNHFISDGVKK.T	U	1		387.9620	1547.8188	1547.8096	5.94	1	(18)	-30761.1	1	7784
	K.AAVYNHFISDGVKK.T	U	2		774.9172	1547.8199	1547.8096	6.66	1	77	131589	1	7785
	K.AAVYNHFISDGVKK.T	U	2		516.9476	1547.8209	1547.8096	7.28	1	(41)	-70067	1	7786
	R.VGLVAVDKGVFVLNK.K	U	1		779.4753	1556.9361	1556.9290	4.56	1	60	102537	1	7886
	R.FYHPDKEDGMLSK.L	U	1		392.4392	1565.7279	1565.7184	6.03	1	(27)	-46141.7	1	7964
	R.FYHPDKEDGMLSK.L	U	6		783.8713	1565.7281	1565.7184	6.20	1	(48)	-82029.7	1	7965
	R.FYHPDKEDGMLSK.L	U	4		522.9167	1565.7284	1565.7184	6.39	1	54	92283.4	1	7966
	R.FYHPDKEDG->M<-LSK.L	U	1	Oxidation (M)	791.8668	1581.7190	1581.7133	3.56	1	(9)	-15380.6	1	8160
	R.FYHPDKEDG->M<-LSK.L	U	1	Oxidation (M)	528.2476	1581.7210	1581.7133	4.87	1	(35)	-59813.3	1	8162
	R.SEETKENERFTVK.A	U	1		532.9356	1595.7850	1595.7791	3.71	2	15	25634.3	1	8335
	R.SEETKENERFTVK.A	U	1		798.9004	1595.7863	1595.7791	4.55	2	(15)	-25634.3	1	8336
	R.AILYNYREAENLK.V	U	2		798.9264	1595.8382	1595.8307	4.72	1	48	82029.7	1	8346
	R.AILYNYREAENLK.V	U	1		532.9536	1595.8390	1595.8307	5.21	1	(5)	-8544.76	1	8347
	R.LDKACEPGVDYVYK.T	U	1		552.9388	1655.7945	1655.7865	4.84	1	32	54686.5	1	8924
	K.AFLDCCEYITQLR.Q	U	3		844.8966	1687.7785	1687.7698	5.18	0	102	174313	1	9212
	R.CAEENCFMHHTEK.E	U	1		846.8341	1691.6535	1691.6490	2.67	0	(12)	-20507.4	1	9236
	R.CAEENCFMHHTEK.E	U	1		564.8932	1691.6577	1691.6490	5.15	0	49	83738.6	1	9237
	K.VYSYYNLDETCIR.F	U	4		848.3941	1694.7736	1694.7610	7.46	0	89	152097	1	9258
	K.VYSYYNLDETCIR.F	U	2		565.9320	1694.7740	1694.7610	7.68	0	(51)	-87156.6	1	9260
	K.DSITTWEILAVSLSDK.K	U	3		889.4746	1776.9345	1776.9145	11.3	0	76	129880	1	9837
	R.VELLYNPAFCSLATAK.K	U	1		599.6502	1795.9286	1795.9178	6.01	0	(61)	-104246	1	9969
	R.VELLYNPAFCSLATAK.K	U	3		898.9720	1795.9295	1795.9178	6.52	0	74	126462	1	9970
	R.TGIPIVTSPYQIHFTK.T	U	2		601.3357	1800.9852	1800.9774	4.34	0	55	93992.4	1	10005
	R.TGIPIVTSPYQIHFTK.T	U	1		901.5005	1800.9865	1800.9774	5.06	0	(49)	-83738.6	1	10006
	R.SDLDDDIIPEEDIISR.S	U	3		615.6335	1843.8788	1843.8687	5.47	0	(47)	-80320.7	1	10276
	R.SDLDDDIIPEEDIISR.S	U	11		922.9469	1843.8792	1843.8687	5.72	0	82	140134	1	10279
	R->.<-QVLLNGVQPSRADALVGK.S	U	1	Gln->pyro-Glu (N-term Q)	924.5253	1847.0361	1847.0265	5.20	1	(14)	-23925.3	1	10313
	R.VSIRPAPETVKKPQDAK.G	U	1		622.0275	1863.0608	1863.0578	1.61	1	22	37596.9	1	10441
	R.VSIRPAPETVKKPQDAK.G	U	1		466.7731	1863.0634	1863.0578	3.03	1	(5)	-8544.76	1	10442
	R.QVLLNGVQPSRADALVGK.S	U	2		933.0373	1864.0601	1864.0530	3.81	1	64	109373	1	10444
	K.DSITTWEILAVSLSDKK.G	U	1		636.0137	1905.0192	1905.0095	5.09	1	(79)	-135007	1	10812
	K.DSITTWEILAVSLSDKK.G	U	1		953.5178	1905.0211	1905.0095	6.09	1	83	141843	1	10813
	K.EYVLPSFEVQLEPEEK.F	U	3		645.9951	1934.9634	1934.9513	6.23	0	(48)	-82029.7	1	11075
	K.EYVLPSFEVQLEPEEK.F	U	6		968.4901	1934.9657	1934.9513	7.43	0	54	92283.4	1	11079
	K.IWDVVEKADIGCTPGSGR.N	U	1		980.4882	1958.9618	1958.9520	4.97	1	81	138425	1	11251
	K.IWDVVEKADIGCTPGSGR.N	U	2		653.9946	1958.9621	1958.9520	5.12	1	(71)	-121336	1	11252
	R.SQFPESWLWTVIEDLK.Q	U	1		660.0084	1977.0033	1976.9884	7.53	0	(29)	-49559.6	1	11417
	R.SQFPESWLWTVIEDLK.Q	U	1		989.5103	1977.0061	1976.9884	8.95	0	89	152097	1	11418
	K.FYYIDDPDGLKVNIIAR.F	U	2		1006.5353	2011.0561	2011.0415	7.29	1	(39)	-66649.1	1	11635
	K.FYYIDDPDGLKVNIIAR.F	U	3		671.3613	2011.0622	2011.0415	10.3	1	47	80320.7	1	11638
	R.KIWDVVEKADIGCTPGSGR.N	U	1		1044.5418	2087.0689	2087.0470	10.5	2	1	1708.95	1	12209
	K.LEDDFDEYIMVIENIIK.S	U	1		700.3533	2098.0380	2098.0180	9.53	0	(38)	-64940.2	1	12253
	K.LEDDFDEYIMVIENIIK.S	U	1		1050.0277	2098.0409	2098.0180	10.9	0	93	158933	1	12254
	K.LEDDFDEYI->M<-VIENIIK.S	U	1	Oxidation (M)	1058.0217	2114.0289	2114.0129	7.57	0	(81)	-138425	1	12408
	K.AYYEDSPQQVFSAEFEVK.E	U	13		1068.9976	2135.9806	2135.9688	5.53	0	97	165768	1	12558
	K.AYYEDSPQQVFSAEFEVK.E	U	6		713.0017	2135.9831	2135.9688	6.73	0	(38)	-64940.2	1	12561
	K.ILLQGTPVAQMTEDAIDGER.L	U	5		719.7033	2156.0879	2156.0783	4.45	0	(95)	-162350	1	12683
	K.ILLQGTPVAQMTEDAIDGER.L	U	4		1079.0514	2156.0882	2156.0783	4.59	0	110	187985	1	12684
	R.EEVPAADLSDQVPDTESETK.I	U	3		720.6693	2158.9861	2158.9754	4.98	0	(41)	-70067	1	12701
	R.EEVPAADLSDQVPDTESETK.I	U	4		1080.5011	2158.9876	2158.9754	5.69	0	92	157224	1	12702
	K.ILLQGTPVAQ->M<-TEDAIDGER.L	U	3	Oxidation (M)	1087.0505	2172.0865	2172.0732	6.12	0	(83)	-141843	1	12766
	K.ILLQGTPVAQ->M<-TEDAIDGER.L	U	4	Oxidation (M)	725.0370	2172.0891	2172.0732	7.32	0	(58)	-99119.2	1	12770
	K.KLEDDFDEYIMVIENIIK.S	U	1		557.5407	2226.1335	2226.1129	9.23	1	(17)	-29052.2	1	13047
	K.KLEDDFDEYIMVIENIIK.S	U	1		743.0535	2226.1386	2226.1129	11.5	1	(8)	-13671.6	1	13049
	K.KLEDDFDEYI->M<-VIENIIK.S	U	1	Oxidation (M)	748.3852	2242.1337	2242.1079	11.5	1	(31)	-52977.5	1	13154
	K.KLEDDFDEYI->M<-VIENIIK.S	U	1	Oxidation (M)	1122.0747	2242.1349	2242.1079	12.0	1	39	66649.1	1	13155
	K.EGAHYLVWGVSSDLWGEKPK.I	U	2		753.3823	2257.1250	2257.1168	3.63	0	(8)	-13671.6	1	13294
	K.EGAHYLVWGVSSDLWGEKPK.I	U	1		565.2886	2257.1255	2257.1168	3.85	0	13	22216.4	1	13295
	R.HIPVVTQGSNVQSLTQDDGVAK.L	U	6		1147.0991	2292.1837	2292.1710	5.53	0	106	181149	1	13622
	R.HIPVVTQGSNVQSLTQDDGVAK.L	U	1		574.0533	2292.1840	2292.1710	5.67	0	(26)	-44432.8	1	13623
	R.HIPVVTQGSNVQSLTQDDGVAK.L	U	11		765.0696	2292.1869	2292.1710	6.93	0	(77)	-131589	1	13628
	K.IKAYYEDSPQQVFSAEFEVK.E	U	2		793.3951	2377.1634	2377.1478	6.58	1	21	35888	1	14110
	K.ILLQGTPVAQMTEDAIDGERLK.H	U	2		800.0977	2397.2712	2397.2573	5.76	1	54	92283.4	1	14241
	K.ILLQGTPVAQ->M<-TEDAIDGERLK.H	U	2	Oxidation (M)	805.4288	2413.2645	2413.2523	5.07	1	(41)	-70067	1	14319
	R.SQFPESWLWTVIEDLKQADK.N	U	1		807.4133	2419.2180	2419.2060	4.97	1	3	5126.86	1	14351
	K.EVTLEDRLDKACEPGVDYVYK.T	U	1		625.5624	2498.2204	2498.1999	8.22	2	3	5126.86	1	14718
	K.DTWVELWPEAEECQDEENQK.Q	U	2		1268.0429	2534.0711	2534.0543	6.63	0	(21)	-35888	1	14939
	K.DTWVELWPEAEECQDEENQK.Q	U	2		845.6988	2534.0747	2534.0543	8.04	0	46	78611.8	1	14942
	R.CAEENCFMHHTEKEVTLEDR.L	U	1		845.7015	2534.0826	2534.0624	7.97	1	(31)	-52977.5	1	14943
	R.CAEENCFMHHTEKEVTLEDR.L	U	1		634.5281	2534.0835	2534.0624	8.30	1	73	124753	1	14944
	K.QVLSNENTQLNSNNGYLSTVTIK.I	U	2		846.4365	2536.2876	2536.2769	4.21	0	74	126462	1	14955
	K.QVLSNENTQLNSNNGYLSTVTIK.I	U	2		1269.1522	2536.2899	2536.2769	5.13	0	(62)	-105955	1	14956
	K->.<-QKPDGIFQEDGPVIHQEMIGGFR.D	U	2	Gln->pyro-Glu (N-term Q)	861.0940	2580.2601	2580.2431	6.59	0	(48)	-82029.7	1	15140
	R.FLYGEQVDGTAFVIFGVQDGDRR.I	U	1		863.7661	2588.2765	2588.2660	4.06	1	5	8544.76	1	15177
	K.QKPDGIFQEDGPVIHQEMIGGFR.D	U	3		866.7680	2597.2822	2597.2697	4.83	0	77	131589	1	15230
	K.QKPDGIFQEDGPVIHQEMIGGFR.D	U	3		650.3280	2597.2829	2597.2697	5.09	0	(33)	-56395.4	1	15231
	K.QKPDGIFQEDGPVIHQE->M<-IGGFR.D	U	1	Oxidation (M)	872.1011	2613.2814	2613.2646	6.43	0	(12)	-20507.4	1	15315
	K.QKPDGIFQEDGPVIHQE->M<-IGGFR.D	U	2	Oxidation (M)	654.3282	2613.2837	2613.2646	7.30	0	(17)	-29052.2	1	15317
	R.T->M<-QALPYNTQGNSNNYLHLSVPR.V	U	1	Oxidation (M)	878.7687	2633.2842	2633.2656	7.06	0	12	20507.4	1	15436
	R.DGALELARSDLDDDIIPEEDIISR.S	U	1		890.7816	2669.3229	2669.3031	7.38	1	61	104246	1	15604
	R.CAEENCFMHHTEKEVTLEDRLDK.A	U	1		723.5783	2890.2841	2890.2684	5.45	2	29	49559.6	1	16308
	R.CAEENCFMHHTEKEVTLEDRLDK.A	U	1		964.4362	2890.2867	2890.2684	6.32	2	(16)	-27343.2	1	16309
	R.QYREPGQDLVVLPLTITSDFIPSFR.L	U	1		964.5279	2890.5618	2890.5229	13.5	1	25	42723.8	1	16311
	K.QKPDGIFQEDGPVIHQEMIGGFRDTR.E	U	1		990.8281	2969.4624	2969.4454	5.71	1	(9)	-15380.6	1	16475
	K.QKPDGIFQEDGPVIHQEMIGGFRDTR.E	U	2		743.3734	2969.4645	2969.4454	6.44	1	28	47850.7	1	16476
	K.YLGDQDATMSILDISMMTGFSPDVEDLK.T	U	1		1546.7250	3091.4354	3091.4076	9.00	0	61	104246	1	16656
	K.YLGDQDATMSILDISMMTGFSPDVEDLK.T	U	1		1031.4867	3091.4382	3091.4076	9.91	0	(27)	-46141.7	1	16657
	K.YLGDQDAT->M<-SILDISMMTGFSPDVEDLK.T	U	1	Oxidation (M)	1036.8200	3107.4380	3107.4025	11.4	0	(20)	-34179	1	16680
	K.EYVLPSFEVQLEPEEKFYYIDDPDGLK.V	U	1		1088.2037	3261.5894	3261.5645	7.63	1	32	54686.5	1	17045
	R.TLNPEHLGQGGVQREEVPAADLSDQVPDTESETK.I	U	1		730.1588	3645.7577	3645.7394	5.00	1	(9)	-15380.6	1	17917
	R.TLNPEHLGQGGVQREEVPAADLSDQVPDTESETK.I	U	2		912.4470	3645.7590	3645.7394	5.36	1	(24)	-41014.8	1	17918
	R.TLNPEHLGQGGVQREEVPAADLSDQVPDTESETK.I	U	3		1216.2606	3645.7600	3645.7394	5.65	1	37	63231.2	1	17920
P02769	Serum albumin OS=Bos taurus GN=ALB PE=1 SV=4	71244	6740	390(251)	72(65)	112.21	83%	P02769_uniprot		0.00547415	9.35505	-0.429	5.82
	Peptide	Unique	Matches	Modification	Observed	Mr(expt)	Mr(calc)	ppm	Miss	Score	#VALUE!	Rank	Query
	K.GACLLPK.I		4		379.7169	757.4192	757.4156	4.75	0	36	61522.3	1	152
	K.LVTDLTK.V		4		395.2420	788.4694	788.4644	6.44	0	41	70067	1	264
	R.LSQKFPK.A		2		424.2568	846.4991	846.4963	3.24	1	40	68358.1	1	640
	R.LCVLHEK.T		3		449.7462	897.4779	897.4742	4.09	0	34	58104.4	1	886
	K.AEFVEVTK.L		3		461.7502	921.4857	921.4807	5.43	0	33	56395.4	1	1016
	K.YLYEIAR.R		6		464.2532	926.4918	926.4861	6.11	0	37	63231.2	1	1031
	K.DLGEEHFK.G		2		487.7355	973.4564	973.4505	6.11	0	28	47850.7	1	1326
	K->.<-QTALVELLK.H		2	Gln->pyro-Glu (N-term Q)	499.3036	996.5926	996.5855	7.05	0	(57)	-97410.3	1	1529
	K.LVVSTQTALA.-		16		501.7975	1001.5805	1001.5757	4.77	0	21	35888	1	1564
	K.QTALVELLK.H		4		507.8170	1013.6195	1013.6121	7.31	0	58	99119.2	1	1662
	K->.<-QNCDQFEK.L		1	Gln->pyro-Glu (N-term Q)	526.2129	1050.4113	1050.4077	3.50	0	22	37596.9	1	1969
	K.SHCIAEVEK.D		1		358.1755	1071.5045	1071.5019	2.47	0	(27)	-46141.7	1	2159
	K.SHCIAEVEK.D		1		536.7605	1071.5064	1071.5019	4.27	0	36	61522.3	1	2160
	K.YLYEIARR.H		2		542.3035	1082.5924	1082.5872	4.76	1	18	30761.1	1	2244
	K.YLYEIARR.H		1		361.8718	1082.5937	1082.5872	5.94	1	(16)	-27343.2	1	2245
	K.EACFAVEGPK.L		4		554.2637	1106.5129	1106.5066	5.67	0	52	88865.5	1	2492
	K.CCTESLVNR.R		3		569.7555	1137.4965	1137.4907	5.16	0	69	117918	1	2887
	K.KQTALVELLK.H		4		381.5782	1141.7127	1141.7070	5.00	1	(43)	-73484.9	1	2949
	K.KQTALVELLK.H		4		571.8644	1141.7142	1141.7070	6.29	1	68	116209	1	2952
	K.LVNELTEFAK.T		6		582.3236	1162.6327	1162.6234	8.00	0	71	121336	1	3160
	R.DTHKSEIAHR.F	U	5		398.5403	1192.5992	1192.5949	3.63	1	48	82029.7	1	3539
	R.DTHKSEIAHR.F	U	3		597.3071	1192.5997	1192.5949	4.06	1	(38)	-64940.2	1	3541
	R.FKDLGEEHFK.G		4		625.3179	1248.6212	1248.6139	5.86	1	(39)	-66649.1	1	4238
	R.FKDLGEEHFK.G		6		417.2144	1248.6213	1248.6139	5.98	1	49	83738.6	1	4240
	R.HPEYAVSVLLR.L		2		642.3637	1282.7127	1282.7034	7.32	0	14	23925.3	1	4680
	K.ECCDKPLLEK.S		1		646.3072	1290.5998	1290.5948	3.91	0	30	51268.6	1	4787
	K.ECCDKPLLEK.S		1		431.2073	1290.6000	1290.5948	4.05	0	(27)	-46141.7	1	4788
	K.FPKAEFVEVTK.L		1		432.2419	1293.7040	1293.6969	5.49	1	25	42723.8	1	4818
	K.HLVDEPQNLIK.Q		8		653.3648	1304.7151	1304.7088	4.78	0	67	114500	1	4993
	K.HLVDEPQNLIK.Q		3		435.9126	1304.7160	1304.7088	5.47	0	(54)	-92283.4	1	4996
	K.TVMENFVAFVDK.C	U	1		467.2380	1398.6923	1398.6853	4.96	0	(32)	-54686.5	1	6084
	K.TVMENFVAFVDK.C	U	3		700.3536	1398.6926	1398.6853	5.19	0	(70)	-119627	1	6085
	K.TV->M<-ENFVAFVDK.C	U	20	Oxidation (M)	708.3532	1414.6919	1414.6803	8.20	0	75	128171	1	6261
	K.SLHTLFGDELCK.V		3		710.3540	1418.6934	1418.6864	4.97	0	55	93992.4	1	6309
	K.SLHTLFGDELCK.V		9		473.9063	1418.6972	1418.6864	7.61	0	(35)	-59813.3	1	6316
	R.RHPEYAVSVLLR.L		3		480.6120	1438.8141	1438.8045	6.69	1	56	95701.3	1	6576
	K.YICDNQDTISSK.L		8		722.3276	1442.6406	1442.6347	4.06	0	94	160641	1	6616
	K.TCVADESHAGCEK.S		1		488.5368	1462.5886	1462.5817	4.71	0	(41)	-70067	1	6858
	K.TCVADESHAGCEK.S		1		732.3016	1462.5887	1462.5817	4.82	0	55	93992.4	1	6859
	R.ETYGDMADCCEK.Q	U	2		739.7694	1477.5241	1477.5160	5.54	0	46	78611.8	1	7095
	K.LGEYGFQNALIVR.Y	U	2		493.9392	1478.7957	1478.7881	5.12	0	(51)	-87156.6	1	7120
	K.LGEYGFQNALIVR.Y	U	17		740.4054	1478.7962	1478.7881	5.48	0	98	167477	1	7123
	K.EYEATLEECCAK.D		3		751.8149	1501.6153	1501.6065	5.91	0	48	82029.7	1	7369
	K.VPQVSTPTLVEVSR.S		3		756.4299	1510.8453	1510.8355	6.47	0	88	150388	1	7452
	K.VPQVSTPTLVEVSR.S		2		504.6226	1510.8459	1510.8355	6.83	0	(39)	-66649.1	1	7454
	K.LKECCDKPLLEK.S		2		766.8953	1531.7760	1531.7738	1.41	1	72	123045	1	7596
	K.LKECCDKPLLEK.S		3		511.6005	1531.7797	1531.7738	3.87	1	(39)	-66649.1	1	7597
	K.LKECCDKPLLEK.S		2		383.9523	1531.7800	1531.7738	4.03	1	(16)	-27343.2	1	7598
	R.LCVLHEKTPVSEK.V		2		513.9475	1538.8207	1538.8127	5.23	1	54	92283.4	1	7699
	R.LCVLHEKTPVSEK.V		2		770.4189	1538.8232	1538.8127	6.86	1	(48)	-82029.7	1	7701
	R.LCVLHEKTPVSEK.V		1		385.7133	1538.8242	1538.8127	7.49	1	(30)	-51268.6	1	7703
	K.LKHLVDEPQNLIK.Q		1		387.4803	1545.8923	1545.8878	2.88	1	(2)	-3417.9	1	7764
	K.LKHLVDEPQNLIK.Q		2		773.9542	1545.8938	1545.8878	3.83	1	47	80320.7	1	7765
	K.LKHLVDEPQNLIK.Q		3		516.3060	1545.8961	1545.8878	5.33	1	(30)	-51268.6	1	7769
	K.DDPHACYSTVFDK.L	U	3		777.8347	1553.6548	1553.6457	5.85	0	60	102537	1	7851
	K.DDPHACYSTVFDK.L	U	1		518.8931	1553.6574	1553.6457	7.53	0	(15)	-25634.3	1	7855
	K.DAFLGSFLYEYSR.R		17		784.3786	1566.7426	1566.7354	4.60	0	83	141843	1	7989
	K.DAFLGSFLYEYSR.R		1		523.2550	1566.7432	1566.7354	4.93	0	(54)	-92283.4	1	7990
	K.LKPDPNTLCDEFK.A		4		788.8931	1575.7716	1575.7603	7.17	0	59	100828	1	8083
	K.LKPDPNTLCDEFK.A		4		526.2658	1575.7756	1575.7603	9.72	0	(46)	-78611.8	1	8085
	R.KVPQVSTPTLVEVSR.S		1		410.7419	1638.9385	1638.9305	4.91	1	(38)	-64940.2	1	8779
	R.KVPQVSTPTLVEVSR.S		7		820.4773	1638.9400	1638.9305	5.83	1	72	123045	1	8781
	R.KVPQVSTPTLVEVSR.S		6		547.3217	1638.9432	1638.9305	7.73	1	(58)	-99119.2	1	8789
	K.AEFVEVTKLVTDLTK.V		1		846.9811	1691.9476	1691.9346	7.71	1	93	158933	1	9240
	K.AEFVEVTKLVTDLTK.V		1		564.9899	1691.9480	1691.9346	7.92	1	(67)	-114500	1	9241
	R.MPCTEDYLSLILNR.L	U	1		862.9252	1723.8358	1723.8273	4.92	0	(85)	-145261	1	9516
	R.MPCTEDYLSLILNR.L	U	1		575.6197	1723.8372	1723.8273	5.77	0	(24)	-41014.8	1	9517
	R.->M<-PCTEDYLSLILNR.L	U	1	Oxidation (M)	870.9229	1739.8313	1739.8222	5.20	0	110	187985	1	9607
	R.->M<-PCTEDYLSLILNR.L	U	1	Oxidation (M)	580.9515	1739.8328	1739.8222	6.08	0	(33)	-56395.4	1	9608
	K.YNGVFQECCQAEDK.G		6		874.3608	1746.7071	1746.6978	5.36	0	70	119627	1	9652
	K.ECCHGDLLECADDR.A		2		875.3383	1748.6621	1748.6553	3.91	0	56	95701.3	1	9665
	K.ECCHGDLLECADDR.A		1		583.8962	1748.6669	1748.6553	6.65	0	(17)	-29052.2	1	9667
	K.DDPHACYSTVFDKLK.H	U	2		898.4234	1794.8322	1794.8247	4.21	1	(41)	-70067	1	9944
	K.DDPHACYSTVFDKLK.H	U	1		449.7160	1794.8349	1794.8247	5.69	1	(15)	-25634.3	1	9947
	K.DDPHACYSTVFDKLK.H	U	3		599.2861	1794.8366	1794.8247	6.61	1	45	76902.8	1	9949
	R.LAKEYEATLEECCAK.D		2		907.9226	1813.8305	1813.8226	4.39	1	76	129880	1	10104
	R.RPCFSALTPDETYVPK.A		7		940.9683	1879.9221	1879.9138	4.39	0	35	59813.3	1	10582
	R.RPCFSALTPDETYVPK.A		7		627.6497	1879.9273	1879.9138	7.18	0	(27)	-46141.7	1	10592
	R.HPYFYAPELLYYANK.Y		1		630.3176	1887.9309	1887.9195	6.02	0	21	35888	1	10659
	R.NECFLSHKDDSPDLPK.L		2		951.4437	1900.8729	1900.8625	5.47	1	43	73484.9	1	10781
	R.NECFLSHKDDSPDLPK.L		1		476.2256	1900.8734	1900.8625	5.71	1	(26)	-44432.8	1	10782
	R.NECFLSHKDDSPDLPK.L		2		634.6324	1900.8755	1900.8625	6.84	1	(39)	-66649.1	1	10784
	K.LFTFHADICTLPDTEK.Q		2		636.6480	1906.9220	1906.9135	4.46	0	(54)	-92283.4	1	10836
	K.LFTFHADICTLPDTEK.Q		2		954.4691	1906.9237	1906.9135	5.34	0	68	116209	1	10839
	K.CCAADDKEACFAVEGPK.L		3		643.2737	1926.7992	1926.7910	4.25	1	(64)	-109373	1	11012
	K.CCAADDKEACFAVEGPK.L		2		964.4075	1926.8004	1926.7910	4.86	1	89	152097	1	11014
	K.DAIPENLPPLTADFAEDK.D		3		652.6635	1954.9685	1954.9524	8.27	0	(50)	-85447.6	1	11231
	K.DAIPENLPPLTADFAEDK.D		3		978.4918	1954.9691	1954.9524	8.56	0	66	112791	1	11232
	K.LKPDPNTLCDEFKADEK.K		6		673.9981	2018.9725	2018.9619	5.26	1	102	174313	1	11738
	K.LKPDPNTLCDEFKADEK.K		6		1010.4943	2018.9741	2018.9619	6.04	1	(94)	-160641	1	11742
	K.LKPDPNTLCDEFKADEK.K		4		505.7516	2018.9775	2018.9619	7.73	1	(27)	-46141.7	1	11748
	K.VHKECCHGDLLECADDR.A		2		705.3040	2112.8901	2112.8775	5.92	1	31	52977.5	1	12390
	K.VHKECCHGDLLECADDR.A		2		529.2309	2112.8945	2112.8775	8.02	1	(30)	-51268.6	1	12391
	K.LKPDPNTLCDEFKADEKK.F		2		537.7750	2147.0710	2147.0568	6.58	2	(32)	-54686.5	1	12642
	K.LKPDPNTLCDEFKADEKK.F		4		716.6981	2147.0724	2147.0568	7.23	2	41	70067	1	12646
	K.ATEEQLKTVMENFVAFVDK.C	U	1		733.7133	2198.1180	2198.0929	11.4	1	69	117918	1	12891
	K.ATEEQLKTVMENFVAFVDK.C	U	1		1100.0675	2198.1204	2198.0929	12.5	1	(16)	-27343.2	1	12892
	K.TVMENFVAFVDKCCAADDK.E	U	1		740.6666	2218.9781	2218.9697	3.76	1	38	64940.2	1	13005
	K.ECCHGDLLECADDRADLAK.Y		1		749.9905	2246.9496	2246.9354	6.31	1	19	32470.1	1	13174
	K.ECCHGDLLECADDRADLAK.Y		1		1124.4822	2246.9498	2246.9354	6.39	1	(1)	-1708.95	1	13175
	K.ECCHGDLLECADDRADLAK.Y		1		562.7453	2246.9521	2246.9354	7.41	1	(14)	-23925.3	1	13176
	K.NYQEAKDAFLGSFLYEYSR.R		1		767.7037	2300.0892	2300.0749	6.20	1	38	64940.2	1	13688
	K.HLVDEPQNLIKQNCDQFEK.L		2		785.7214	2354.1425	2354.1325	4.25	1	39	66649.1	1	13998
	K.HLVDEPQNLIKQNCDQFEK.L		1		1178.0820	2354.1495	2354.1325	7.23	1	(14)	-23925.3	1	14000
	K.DAIPENLPPLTADFAEDKDVCK.N		4		820.0700	2457.1882	2457.1733	6.05	1	74	126462	1	14511
	K.DAIPENLPPLTADFAEDKDVCK.N		1		1229.6027	2457.1908	2457.1733	7.09	1	(8)	-13671.6	1	14515
	K.YNGVFQECCQAEDKGACLLPK.I		3		829.7151	2486.1236	2486.1028	8.36	1	36	61522.3	1	14670
	K.GLVLIAFSQYLQQCPFDEHVK.L		1		831.4324	2491.2755	2491.2570	7.42	0	3	5126.86	1	14693
	K.AFDEKLFTFHADICTLPDTEK.Q		2		625.3081	2497.2033	2497.1835	7.93	1	(29)	-49559.6	1	14709
	K.AFDEKLFTFHADICTLPDTEK.Q		2		833.4085	2497.2035	2497.1835	8.00	1	62	105955	1	14710
	K->.<-QEPERNECFLSHKDDSPDLPK.L		2	Gln->pyro-Glu (N-term Q)	842.0568	2523.1485	2523.1336	5.88	2	(6)	-10253.7	1	14892
	K.QNCDQFEKLGEYGFQNALIVR.Y	U	1		633.0641	2528.2273	2528.2118	6.12	1	(17)	-29052.2	1	14909
	K.QNCDQFEKLGEYGFQNALIVR.Y	U	2		843.7512	2528.2317	2528.2118	7.86	1	64	109373	1	14911
	K.QEPERNECFLSHKDDSPDLPK.L		3		847.7332	2540.1778	2540.1601	6.96	2	28	47850.7	1	14996
	K.QEPERNECFLSHKDDSPDLPK.L		3		636.0518	2540.1782	2540.1601	7.10	2	(23)	-39305.9	1	14998
	K.VHKECCHGDLLECADDRADLAK.Y		2		871.3973	2611.1700	2611.1577	4.70	2	55	93992.4	1	15300
	K.VHKECCHGDLLECADDRADLAK.Y		1		653.7999	2611.1706	2611.1577	4.93	2	(10)	-17089.5	1	15301
	K.VHKECCHGDLLECADDRADLAK.Y		3		523.2415	2611.1709	2611.1577	5.05	2	(10)	-17089.5	1	15302
	K.SHCIAEVEKDAIPENLPPLTADFAEDK.D		2		1003.8265	3008.4576	3008.4437	4.63	1	48	82029.7	1	16534
	K.EYEATLEECCAKDDPHACYSTVFDK.L	U	1		1013.4260	3037.2561	3037.2416	4.77	1	42	71776	1	16584
	K.DAIPENLPPLTADFAEDKDVCKNYQEAK.D		1		798.6398	3190.5302	3190.5128	5.45	2	(12)	-20507.4	1	16909
	K.DAIPENLPPLTADFAEDKDVCKNYQEAK.D		1		1064.5177	3190.5313	3190.5128	5.78	2	21	35888	1	16910
	K.EYEATLEECCAKDDPHACYSTVFDKLK.H	U	2		656.6946	3278.4365	3278.4206	4.86	2	(15)	-25634.3	1	17084
	K.EYEATLEECCAKDDPHACYSTVFDKLK.H	U	1		820.6167	3278.4377	3278.4206	5.22	2	(7)	-11962.7	1	17085
	K.EYEATLEECCAKDDPHACYSTVFDKLK.H	U	1		1093.8200	3278.4380	3278.4206	5.32	2	28	47850.7	1	17086
	K.TVMENFVAFVDKCCAADDKEACFAVEGPK.L	U	1		827.8802	3307.4917	3307.4658	7.82	2	42	71776	1	17151
	R.LAKEYEATLEECCAKDDPHACYSTVFDK.L	U	1		670.9022	3349.4744	3349.4577	4.99	2	(3)	-5126.86	1	17218
	R.LAKEYEATLEECCAKDDPHACYSTVFDK.L	U	1		838.3765	3349.4767	3349.4577	5.68	2	3	5126.86	1	17219
	R.LAKEYEATLEECCAKDDPHACYSTVFDK.L	U	1		1117.5004	3349.4793	3349.4577	6.44	2	(3)	-5126.86	1	17220
	K.SHCIAEVEKDAIPENLPPLTADFAEDKDVCK.N		2		1171.2368	3510.6886	3510.6647	6.83	2	68	116209	1	17576
	K.SHCIAEVEKDAIPENLPPLTADFAEDKDVCK.N		3		703.1450	3510.6887	3510.6647	6.85	2	(46)	-78611.8	1	17577
	K.SHCIAEVEKDAIPENLPPLTADFAEDKDVCK.N		1		878.6796	3510.6894	3510.6647	7.05	2	(43)	-73484.9	1	17578
	Peptide	Unique	Matches	Modification	Observed	Mr(expt)	Mr(calc)	ppm	Miss	Score	#VALUE!	Rank	Query
	K.INVEVR.G		1		365.2182	728.4218	728.4181	5.18	0	57	97410.3	1	63
	K.ILQVER.E		2		379.2344	756.4543	756.4494	6.47	0	43	73484.9	1	146
	R.AVDLIQK.G		2		393.7419	785.4693	785.4647	5.83	0	41	70067	1	244
	R.VFALDQK.M		2		410.7341	819.4537	819.4491	5.68	0	54	92283.4	1	466
	R.ANTFLGAK.A		2		411.2319	820.4492	820.4443	6.04	0	54	92283.4	1	469
	R.GQIVSVHR.E	U	1		448.2604	894.5063	894.5036	3.10	0	42	71776	1	872
	K.FACYSPR.V		2		450.7077	899.4008	899.3960	5.36	0	39	66649.1	1	895
	R.VDYGFQVK.V		3		478.2509	954.4871	954.4811	6.34	0	36	61522.3	1	1201
	R.TRGQVGLAR.A		1		479.2856	956.5565	956.5516	5.22	1	26	44432.8	1	1216
	R.ICFLHLR.R	U	3		479.7707	957.5269	957.5218	5.28	0	52	88865.5	1	1227
	K.LNLKTESR.A		1		480.7792	959.5439	959.5400	4.13	1	42	71776	1	1243
	R->.<-QGSFQGGFR.S		2	Gln->pyro-Glu (N-term Q)	483.7279	965.4412	965.4356	5.83	0	19	32470.1	1	1269
	R.EFHMHLR.L	U	2		485.2427	968.4709	968.4650	6.08	0	29	49559.6	1	1295
	R.IGVPLSVAVK.L	U	3		491.8211	981.6277	981.6223	5.50	0	62	105955	1	1392
	R.EFH->M<-HLR.L	U	1	Oxidation (M)	493.2401	984.4656	984.4600	5.74	0	(8)	-13671.6	1	1421
	K.LELNVDSSK.A		2		502.7692	1003.5239	1003.5186	5.32	0	55	93992.4	1	1585
	K.AYRPGDTVK.L		1		503.7724	1005.5302	1005.5243	5.82	0	17	29052.2	1	1597
	K.AEFQGVLEK.L		2		510.7741	1019.5337	1019.5287	4.88	0	44	75193.9	1	1727
	K.VDFSLSSDR.D		2		513.2527	1024.4908	1024.4825	8.09	0	51	87156.6	1	1773
	K.SHKPLDMVK.V		2		352.1964	1053.5674	1053.5641	3.15	0	30	51268.6	1	2022
	K.SHKPLDMVK.V		1		527.7918	1053.5691	1053.5641	4.73	0	(27)	-46141.7	1	2024
	K.CSVFYGAPR.K		5		528.7539	1055.4931	1055.4859	6.91	0	50	85447.6	1	2043
	K.DRAVDLIQK.G		1		529.3057	1056.5968	1056.5927	3.81	1	12	20507.4	1	2055
	K.LGQYTSPVAK.R		2		532.2951	1062.5756	1062.5710	4.42	0	(57)	-97410.3	1	2103
	R.FGLLGEDGEK.T		4		532.7708	1063.5269	1063.5186	7.86	0	70	119627	1	2109
	R.GQQDLEGYR.M		2		533.2512	1064.4878	1064.4887	-0.85	0	50	85447.6	1	2118
	R.ITQVLHFTK.D		3		543.8218	1085.6291	1085.6233	5.33	0	45	76902.8	1	2281
	R.ITQVLHFTK.D		3		362.8837	1085.6294	1085.6233	5.55	0	(30)	-51268.6	1	2282
	K.YVLPNFEVK.I		4		554.8091	1107.6036	1107.5964	6.48	0	47	80320.7	1	2521
	R.LLLFSPSVVR.I		6		565.8542	1129.6939	1129.6859	7.10	0	58	99119.2	1	2784
	R.YRVFALDQK.M		3		570.3170	1138.6195	1138.6135	5.28	1	45	76902.8	1	2900
	R.YRVFALDQK.M		2		380.5473	1138.6201	1138.6135	5.79	1	(41)	-70067	1	2902
	K.TTGLCVATPAR.L		2		573.8038	1145.5931	1145.5863	5.94	0	57	97410.3	1	2972
	R.DGSYGAWLHR.D		2		581.2790	1160.5435	1160.5363	6.24	0	66	112791	1	3126
	R.DGSYGAWLHR.D		2		387.8554	1160.5444	1160.5363	6.98	0	(29)	-49559.6	1	3127
	K.LQDAPSGQVVR.G	U	2		585.3198	1168.6251	1168.6200	4.32	0	46	78611.8	1	3292
	R.VAHNNLMAMAK.D		2		600.3090	1198.6034	1198.5950	6.94	0	49	83738.6	1	3624
	K.AAGLAFSDGDHR.T		3		406.1974	1215.5703	1215.5632	5.76	0	(46)	-78611.8	1	3873
	K.AAGLAFSDGDHR.T		2		608.7927	1215.5708	1215.5632	6.19	0	74	126462	1	3875
	K.KYVLPNFEVK.I		3		618.8565	1235.6985	1235.6914	5.73	1	49	83738.6	1	4070
	K.KYVLPNFEVK.I		2		412.9071	1235.6994	1235.6914	6.47	1	(25)	-42723.8	1	4071
	R.DMSGSPASSIPVK.V	U	3		638.3201	1274.6257	1274.6176	6.33	0	69	117918	1	4575
	R.GQIVSVHREPR.S	U	2		639.3591	1276.7036	1276.7000	2.80	1	35	59813.3	1	4616
	R.GQIVSVHREPR.S	U	2		426.5757	1276.7054	1276.7000	4.21	1	(20)	-34179	1	4618
	R.D->M<-SGSPASSIPVK.V	U	3	Oxidation (M)	646.3163	1290.6180	1290.6126	4.22	0	(23)	-39305.9	1	4790
	K.LNISTDDLPGLR.L		2		657.3611	1312.7076	1312.6987	6.81	0	64	109373	1	5091
	R.GSFDFPVGDAISK.I		3		670.3342	1338.6538	1338.6456	6.12	0	46	78611.8	1	5373
	R.ADLEKLTSLSDR.Y		2		449.9129	1346.7170	1346.7041	9.53	1	15	25634.3	1	5490
	R.SFFPENWLWK.V		2		677.3390	1352.6634	1352.6554	5.97	0	44	75193.9	1	5566
	R.FMSSPFSLDLSK.T	U	3		679.8420	1357.6694	1357.6588	7.83	0	72	123045	1	5619
	R.DSSTWLTAFVLK.I		1		684.3678	1366.7210	1366.7133	5.69	0	45	76902.8	1	5730
	K.VEEVDRFSQLR.L		2		689.3632	1376.7119	1376.7048	5.13	1	38	64940.2	1	5789
	K.VEEVDRFSQLR.L		2		459.9116	1376.7129	1376.7048	5.90	1	(27)	-46141.7	1	5791
	R.LEEELQFSLGSK.I		2		690.3619	1378.7092	1378.6980	8.14	0	73	124753	1	5819
	R.NPSHVNELCSPK.V		2		691.3320	1380.6495	1380.6456	2.84	0	65	111082	1	5829
	R.NPSHVNELCSPK.V		2		461.2240	1380.6503	1380.6456	3.39	0	(38)	-64940.2	1	5831
	K.LVDGQCQISLQK.A		5		694.8676	1387.7207	1387.7130	5.56	0	71	121336	1	5938
	K.AELADQAASWLTR.Q		1		477.9147	1430.7223	1430.7154	4.83	0	(30)	-51268.6	1	6462
	K.AELADQAASWLTR.Q		3		716.3696	1430.7246	1430.7154	6.45	0	93	158933	1	6464
	K.TEQWSMLPPETK.D		1		723.8516	1445.6886	1445.6861	1.74	0	24	41014.8	1	6653
	K.ILSLAQDQVGGSAEK.L	U	3		758.4098	1514.8050	1514.7940	7.27	0	96	164059	1	7471
	K.LQETATWLLSQQR.D		2		787.4255	1572.8365	1572.8260	6.70	0	69	117918	1	8053
	K.LQETATWLLSQQR.D		2		525.2862	1572.8367	1572.8260	6.84	0	(43)	-73484.9	1	8055
	K->.<-QTDMQGVNLLFSSR.R		2	Gln->pyro-Glu (N-term Q)	789.8887	1577.7629	1577.7508	7.67	0	(77)	-131589	1	8103
	R.FGLLGEDGEKTFLR.G		5		791.4211	1580.8276	1580.8199	4.90	1	94	160641	1	8128
	R.FGLLGEDGEKTFLR.G		7		527.9509	1580.8310	1580.8199	7.03	1	(76)	-129880	1	8136
	K.QTDMQGVNLLFSSR.R		4		798.4009	1594.7872	1594.7773	6.19	0	(80)	-136716	1	8319
	K.QTDMQGVNLLFSSR.R		3		532.6033	1594.7882	1594.7773	6.78	0	(46)	-78611.8	1	8321
	K.QTD->M<-QGVNLLFSSR.R		9	Oxidation (M)	806.3970	1610.7794	1610.7723	4.42	0	84	143552	1	8473
	R.YIYGKPVQGVAYVR.F		1		806.9511	1611.8875	1611.8773	6.36	0	43	73484.9	1	8491
	R.YIYGKPVQGVAYVR.F		1		538.3036	1611.8889	1611.8773	7.22	0	(18)	-30761.1	1	8492
	R.DDGPFHDPCPVIHR.E		3		554.5906	1660.7499	1660.7417	4.97	0	32	54686.5	1	8963
	R.DDGPFHDPCPVIHR.E		1		831.3824	1660.7503	1660.7417	5.24	0	(11)	-18798.5	1	8964
	R.DDGPFHDPCPVIHR.E		1		416.1957	1660.7539	1660.7417	7.35	0	(21)	-35888	1	8968
	R.ALVALGAVDTALYAVGGK.S		1		844.9866	1687.9587	1687.9509	4.65	0	105	179440	1	9215
	R.ALVALGAVDTALYAVGGK.S		1		563.6604	1687.9594	1687.9509	5.04	0	(38)	-64940.2	1	9216
	R.DFILLNVPIPQAQAR.I	U	1		847.9875	1693.9604	1693.9515	5.26	0	30	51268.6	1	9250
	K.EYLIMGLDGATYDLK.G		3		851.4299	1700.8453	1700.8331	7.18	0	78	133298	1	9322
	K.EYLIMGLDGATYDLK.G		1		567.9563	1700.8471	1700.8331	8.22	0	(28)	-47850.7	1	9323
	K.AAGLAFSDGDHRTEIR.K		2		858.4322	1714.8498	1714.8387	6.50	1	(36)	-61522.3	1	9448
	K.AAGLAFSDGDHRTEIR.K		3		572.6240	1714.8502	1714.8387	6.73	1	42	71776	1	9449
	R.KPFLSCCQFAESLR.K	U	1		581.6195	1741.8365	1741.8280	4.90	0	1	1708.95	1	9625
	R.EEMVYELNPLDPLGR.T		1		887.9441	1773.8736	1773.8607	7.29	0	56	95701.3	1	9811
	K.AAGLAFSDGDHRTEIRK.S		1		922.4775	1842.9404	1842.9336	3.67	2	(7)	-11962.7	1	10264
	K.AAGLAFSDGDHRTEIRK.S		2		461.7429	1842.9423	1842.9336	4.72	2	(12)	-20507.4	1	10266
	K.AAGLAFSDGDHRTEIRK.S		4		615.3225	1842.9455	1842.9336	6.45	2	32	54686.5	1	10269
	K.LLSTLCSADVCQCAEGK.C		3		956.4381	1910.8617	1910.8536	4.21	0	69	117918	1	10874
	R.YLDKTEQWSMLPPETK.D		4		655.9976	1964.9709	1964.9553	7.90	1	(43)	-73484.9	1	11312
	R.YLDKTEQWSMLPPETK.D		4		983.4933	1964.9720	1964.9553	8.49	1	50	85447.6	1	11315
	R.GHLFLQTDQPVYNPGQR.V	U	2		985.5024	1968.9902	1968.9806	4.87	0	106	181149	1	11339
	R.GHLFLQTDQPVYNPGQR.V	U	2		657.3388	1968.9946	1968.9806	7.10	0	(44)	-75193.9	1	11341
	R.TLEIPGNSDPNIIPEGDFK.S		1		686.0160	2055.0261	2055.0160	4.92	0	(3)	-5126.86	1	12000
	R.TLEIPGNSDPNIIPEGDFK.S		4		1028.5220	2055.0294	2055.0160	6.50	0	53	90574.5	1	12002
	R.SFFPENWLWKVEEVDR.F		2		694.3485	2080.0237	2080.0054	8.79	1	(28)	-47850.7	1	12160
	R.SFFPENWLWKVEEVDR.F		1		1041.0201	2080.0257	2080.0054	9.76	1	42	71776	1	12161
	R.VDVQAGGCEGKLELNVDSSK.A		2		702.3490	2104.0252	2104.0107	6.90	1	18	30761.1	1	12291
	R.RGHLFLQTDQPVYNPGQR.V	U	1		1063.5527	2125.0909	2125.0817	4.32	1	(2)	-3417.9	1	12477
	R.RGHLFLQTDQPVYNPGQR.V	U	2		532.2816	2125.0974	2125.0817	7.36	1	(54)	-92283.4	1	12480
	R.RGHLFLQTDQPVYNPGQR.V	U	3		709.3731	2125.0975	2125.0817	7.42	1	64	109373	1	12481
	K.MRPATDILTVTVENSQGFR.V	U	4		712.3722	2134.0947	2134.0841	4.99	0	54	92283.4	1	12532
	K.->M<-RPATDILTVTVENSQGFR.V	U	2	Oxidation (M)	717.7047	2150.0923	2150.0790	6.18	0	(26)	-44432.8	1	12658
	R.LPQGCAEQT->M<-TLLAPTLAASR.Y		1	Oxidation (M)	749.0565	2244.1477	2244.1242	10.5	0	7	11962.7	1	13165
	R.YLDKTEQWS->M<-LPPETKDR.A		1	Oxidation (M)	751.6946	2252.0619	2252.0783	-7.28	2	1	1708.95	2	13220
	R.AMELLQEEDLIEEDDIPVR.S		2		753.0402	2256.0987	2256.0831	6.89	0	(70)	-119627	1	13282
	R.AMELLQEEDLIEEDDIPVR.S		3		1129.0570	2256.0995	2256.0831	7.26	0	109	186276	1	13284
	R.A->M<-ELLQEEDLIEEDDIPVR.S		2	Oxidation (M)	758.3726	2272.0960	2272.0780	7.93	0	(47)	-80320.7	1	13407
	R.A->M<-ELLQEEDLIEEDDIPVR.S		7	Oxidation (M)	1137.0558	2272.0970	2272.0780	8.37	0	(102)	-174313	1	13409
	K.NQDFEQNTDGSGQVIVSIGVPR.T	U	2		787.3913	2359.1521	2359.1404	4.93	0	18	30761.1	1	14028
	K.GDPQYLLDSNSWIEEMPSER.M		3		789.3631	2365.0675	2365.0532	6.03	0	(43)	-73484.9	1	14052
	K.GDPQYLLDSNSWIEEMPSER.M		1		1183.5411	2365.0677	2365.0532	6.14	0	69	117918	1	14053
	K.GDPQYLLDSNSWIEE->M<-PSER.M		2	Oxidation (M)	1191.5389	2381.0633	2381.0481	6.38	0	(47)	-80320.7	1	14130
	K.GDPQYLLDSNSWIEE->M<-PSER.M		4	Oxidation (M)	794.6954	2381.0643	2381.0481	6.79	0	(44)	-75193.9	1	14131
	R.EGALHREEMVYELNPLDPLGR.T		2		813.4159	2437.2260	2437.2059	8.24	1	34	58104.4	1	14440
	R.EGALHREE->M<-VYELNPLDPLGR.T		1	Oxidation (M)	818.7448	2453.2126	2453.2009	4.78	1	(13)	-22216.4	1	14494
	R.LQLEPGKEYLIMGLDGATYDLK.G		2		823.1010	2466.2810	2466.2716	3.83	1	60	102537	1	14553
	R.LQLEPGKEYLIMGLDGATYDLK.G		1		1234.1487	2466.2828	2466.2716	4.55	1	(57)	-97410.3	1	14554
	R.VTASDPLEALGSEGALSPGGLASLLR.L		1		1241.1703	2480.3260	2480.3122	5.57	0	(17)	-29052.2	1	14643
	R.VTASDPLEALGSEGALSPGGLASLLR.L		1		827.7859	2480.3360	2480.3122	9.60	0	50	85447.6	1	14644
	R.LQLEPGKEYLI->M<-GLDGATYDLK.G		1	Oxidation (M)	828.4327	2482.2764	2482.2665	3.99	1	(27)	-46141.7	1	14649
	R.LYVAAAVIESPGGEMEEAELTSWR.F	U	5		870.0967	2607.2682	2607.2526	5.98	0	74	126462	1	15279
	K.VFEAMNSYDLGCGPGGGDTAPQVFK.A		2		873.0654	2616.1745	2616.1625	4.57	0	(90)	-153806	1	15332
	K.VFEAMNSYDLGCGPGGGDTAPQVFK.A		1		1309.0952	2616.1759	2616.1625	5.11	0	92	157224	1	15333
	R.LYVAAAVIESPGGE->M<-EEAELTSWR.F	U	1	Oxidation (M)	875.4304	2623.2693	2623.2475	8.28	0	(24)	-41014.8	1	15378
	K.VFEA->M<-NSYDLGCGPGGGDTAPQVFK.A		2	Oxidation (M)	878.4061	2632.1964	2632.1574	14.8	0	(74)	-126462	1	15427
	R.STQDTVVALDALSAYWIASYTAEEK.G		1		911.4551	2731.3436	2731.3228	7.60	0	0	0	1	15867
B0JYQ0	ALB protein OS=Bos taurus GN=ALB PE=2 SV=1	71244	5263	311(201)	61(53)	44.99	76%	B0JYQ0_uniprot		0.00436528	7.46005	-0.432	5.95
	Peptide	Unique	Matches	Modification	Observed	Mr(expt)	Mr(calc)	ppm	Miss	Score	#VALUE!	Rank	Query
	K.GACLLPK.I		4		379.7169	757.4192	757.4156	4.75	0	36	61522.3	1	152
	K.LVTDLTK.V		4		395.2420	788.4694	788.4644	6.44	0	41	70067	1	264
	R.LSQKFPK.A		2		424.2568	846.4991	846.4963	3.24	1	40	68358.1	1	640
	R.LCVLHEK.T		3		449.7462	897.4779	897.4742	4.09	0	34	58104.4	1	886
	K.AEFVEVTK.L		3		461.7502	921.4857	921.4807	5.43	0	33	56395.4	1	1016
	K.YLYEIAR.R		6		464.2532	926.4918	926.4861	6.11	0	37	63231.2	1	1031
	K.DLGEEHFK.G		2		487.7355	973.4564	973.4505	6.11	0	28	47850.7	1	1326
	K->.<-QTALVELLK.H		2	Gln->pyro-Glu (N-term Q)	499.3036	996.5926	996.5855	7.05	0	(57)	-97410.3	1	1529
	K.LVVSTQTALA.-		16		501.7975	1001.5805	1001.5757	4.77	0	21	35888	1	1564
	K.QTALVELLK.H		4		507.8170	1013.6195	1013.6121	7.31	0	58	99119.2	1	1662
	K->.<-QNCDQFEK.L		1	Gln->pyro-Glu (N-term Q)	526.2129	1050.4113	1050.4077	3.50	0	22	37596.9	1	1969
	K.SHCIAEVEK.D		1		358.1755	1071.5045	1071.5019	2.47	0	(27)	-46141.7	1	2159
	K.SHCIAEVEK.D		1		536.7605	1071.5064	1071.5019	4.27	0	36	61522.3	1	2160
	K.YLYEIARR.H		2		542.3035	1082.5924	1082.5872	4.76	1	18	30761.1	1	2244
	K.YLYEIARR.H		1		361.8718	1082.5937	1082.5872	5.94	1	(16)	-27343.2	1	2245
	K.EACFAVEGPK.L		4		554.2637	1106.5129	1106.5066	5.67	0	52	88865.5	1	2492
	K.CCTESLVNR.R		3		569.7555	1137.4965	1137.4907	5.16	0	69	117918	1	2887
	K.KQTALVELLK.H		4		381.5782	1141.7127	1141.7070	5.00	1	(43)	-73484.9	1	2949
	K.KQTALVELLK.H		4		571.8644	1141.7142	1141.7070	6.29	1	68	116209	1	2952
	K.LVNELTEFAK.T		6		582.3236	1162.6327	1162.6234	8.00	0	71	121336	1	3160
	R.FKDLGEEHFK.G		4		625.3179	1248.6212	1248.6139	5.86	1	(39)	-66649.1	1	4238
	R.FKDLGEEHFK.G		6		417.2144	1248.6213	1248.6139	5.98	1	49	83738.6	1	4240
	R.HPEYAVSVLLR.L		2		642.3637	1282.7127	1282.7034	7.32	0	14	23925.3	1	4680
	K.ECCDKPLLEK.S		1		646.3072	1290.5998	1290.5948	3.91	0	30	51268.6	1	4787
	K.ECCDKPLLEK.S		1		431.2073	1290.6000	1290.5948	4.05	0	(27)	-46141.7	1	4788
	K.FPKAEFVEVTK.L		1		432.2419	1293.7040	1293.6969	5.49	1	25	42723.8	1	4818
	K.HLVDEPQNLIK.Q		8		653.3648	1304.7151	1304.7088	4.78	0	67	114500	1	4993
	K.HLVDEPQNLIK.Q		3		435.9126	1304.7160	1304.7088	5.47	0	(54)	-92283.4	1	4996
	K.TVMENFVAFVGK.C	U	1		671.3519	1340.6893	1340.6799	7.04	0	22	37596.9	1	5400
	K.SLHTLFGDELCK.V		3		710.3540	1418.6934	1418.6864	4.97	0	55	93992.4	1	6309
	K.SLHTLFGDELCK.V		9		473.9063	1418.6972	1418.6864	7.61	0	(35)	-59813.3	1	6316
	R.RHPEYAVSVLLR.L		3		480.6120	1438.8141	1438.8045	6.69	1	56	95701.3	1	6576
	K.YICDNQDTISSK.L		8		722.3276	1442.6406	1442.6347	4.06	0	94	160641	1	6616
	K.TCVADESHAGCEK.S		1		488.5368	1462.5886	1462.5817	4.71	0	(41)	-70067	1	6858
	K.TCVADESHAGCEK.S		1		732.3016	1462.5887	1462.5817	4.82	0	55	93992.4	1	6859
	K.EYEATLEECCAK.D		3		751.8149	1501.6153	1501.6065	5.91	0	48	82029.7	1	7369
	K.VPQVSTPTLVEVSR.S		3		756.4299	1510.8453	1510.8355	6.47	0	88	150388	1	7452
	K.VPQVSTPTLVEVSR.S		2		504.6226	1510.8459	1510.8355	6.83	0	(39)	-66649.1	1	7454
	K.LKECCDKPLLEK.S		2		766.8953	1531.7760	1531.7738	1.41	1	72	123045	1	7596
	K.LKECCDKPLLEK.S		3		511.6005	1531.7797	1531.7738	3.87	1	(39)	-66649.1	1	7597
	K.LKECCDKPLLEK.S		2		383.9523	1531.7800	1531.7738	4.03	1	(16)	-27343.2	1	7598
	K.LGEYGFQNELIVR.Y	U	1		769.4080	1536.8015	1536.7936	5.12	0	24	41014.8	1	7660
	R.LCVLHEKTPVSEK.V		2		513.9475	1538.8207	1538.8127	5.23	1	54	92283.4	1	7699
	R.LCVLHEKTPVSEK.V		2		770.4189	1538.8232	1538.8127	6.86	1	(48)	-82029.7	1	7701
	R.LCVLHEKTPVSEK.V		1		385.7133	1538.8242	1538.8127	7.49	1	(30)	-51268.6	1	7703
	K.LKHLVDEPQNLIK.Q		1		387.4803	1545.8923	1545.8878	2.88	1	(2)	-3417.9	1	7764
	K.LKHLVDEPQNLIK.Q		2		773.9542	1545.8938	1545.8878	3.83	1	47	80320.7	1	7765
	K.LKHLVDEPQNLIK.Q		3		516.3060	1545.8961	1545.8878	5.33	1	(30)	-51268.6	1	7769
	K.DAFLGSFLYEYSR.R		17		784.3786	1566.7426	1566.7354	4.60	0	83	141843	1	7989
	K.DAFLGSFLYEYSR.R		1		523.2550	1566.7432	1566.7354	4.93	0	(54)	-92283.4	1	7990
	K.LKPDPNTLCDEFK.A		4		788.8931	1575.7716	1575.7603	7.17	0	59	100828	1	8083
	K.LKPDPNTLCDEFK.A		4		526.2658	1575.7756	1575.7603	9.72	0	(46)	-78611.8	1	8085
	R.KVPQVSTPTLVEVSR.S		1		410.7419	1638.9385	1638.9305	4.91	1	(38)	-64940.2	1	8779
	R.KVPQVSTPTLVEVSR.S		7		820.4773	1638.9400	1638.9305	5.83	1	72	123045	1	8781
	R.KVPQVSTPTLVEVSR.S		6		547.3217	1638.9432	1638.9305	7.73	1	(58)	-99119.2	1	8789
	K.AEFVEVTKLVTDLTK.V		1		846.9811	1691.9476	1691.9346	7.71	1	93	158933	1	9240
	K.AEFVEVTKLVTDLTK.V		1		564.9899	1691.9480	1691.9346	7.92	1	(67)	-114500	1	9241
	R.MPCAEDYLSLILNR.L	U	1		847.9267	1693.8388	1693.8167	13.1	0	41	70067	1	9247
	K.YNGVFQECCQAEDK.G		6		874.3608	1746.7071	1746.6978	5.36	0	70	119627	1	9652
	K.ECCHGDLLECADDR.A		2		875.3383	1748.6621	1748.6553	3.91	0	56	95701.3	1	9665
	K.ECCHGDLLECADDR.A		1		583.8962	1748.6669	1748.6553	6.65	0	(17)	-29052.2	1	9667
	R.LAKEYEATLEECCAK.D		2		907.9226	1813.8305	1813.8226	4.39	1	76	129880	1	10104
	R.RPCFSALTPDETYVPK.A		7		940.9683	1879.9221	1879.9138	4.39	0	35	59813.3	1	10582
	R.RPCFSALTPDETYVPK.A		7		627.6497	1879.9273	1879.9138	7.18	0	(27)	-46141.7	1	10592
	R.HPYFYAPELLYYANK.Y		1		630.3176	1887.9309	1887.9195	6.02	0	21	35888	1	10659
	R.NECFLSHKDDSPDLPK.L		2		951.4437	1900.8729	1900.8625	5.47	1	43	73484.9	1	10781
	R.NECFLSHKDDSPDLPK.L		1		476.2256	1900.8734	1900.8625	5.71	1	(26)	-44432.8	1	10782
	R.NECFLSHKDDSPDLPK.L		2		634.6324	1900.8755	1900.8625	6.84	1	(39)	-66649.1	1	10784
	K.LFTFHADICTLPDTEK.Q		2		636.6480	1906.9220	1906.9135	4.46	0	(54)	-92283.4	1	10836
	K.LFTFHADICTLPDTEK.Q		2		954.4691	1906.9237	1906.9135	5.34	0	68	116209	1	10839
	K.CCAADDKEACFAVEGPK.L		3		643.2737	1926.7992	1926.7910	4.25	1	(64)	-109373	1	11012
	K.CCAADDKEACFAVEGPK.L		2		964.4075	1926.8004	1926.7910	4.86	1	89	152097	1	11014
	K.DAIPENLPPLTADFAEDK.D		3		652.6635	1954.9685	1954.9524	8.27	0	(50)	-85447.6	1	11231
	K.DAIPENLPPLTADFAEDK.D		3		978.4918	1954.9691	1954.9524	8.56	0	66	112791	1	11232
	K.LKPDPNTLCDEFKADEK.K		6		673.9981	2018.9725	2018.9619	5.26	1	102	174313	1	11738
	K.LKPDPNTLCDEFKADEK.K		6		1010.4943	2018.9741	2018.9619	6.04	1	(94)	-160641	1	11742
	K.LKPDPNTLCDEFKADEK.K		4		505.7516	2018.9775	2018.9619	7.73	1	(27)	-46141.7	1	11748
	K.VHKECCHGDLLECADDR.A		2		705.3040	2112.8901	2112.8775	5.92	1	31	52977.5	1	12390
	K.VHKECCHGDLLECADDR.A		2		529.2309	2112.8945	2112.8775	8.02	1	(30)	-51268.6	1	12391
	K.LKPDPNTLCDEFKADEKK.F		2		537.7750	2147.0710	2147.0568	6.58	2	(32)	-54686.5	1	12642
	K.LKPDPNTLCDEFKADEKK.F		4		716.6981	2147.0724	2147.0568	7.23	2	41	70067	1	12646
	K.ECCHGDLLECADDRADLAK.Y		1		749.9905	2246.9496	2246.9354	6.31	1	19	32470.1	1	13174
	K.ECCHGDLLECADDRADLAK.Y		1		1124.4822	2246.9498	2246.9354	6.39	1	(1)	-1708.95	1	13175
	K.ECCHGDLLECADDRADLAK.Y		1		562.7453	2246.9521	2246.9354	7.41	1	(14)	-23925.3	1	13176
	K.NYQEAKDAFLGSFLYEYSR.R		1		767.7037	2300.0892	2300.0749	6.20	1	38	64940.2	1	13688
	K.HLVDEPQNLIKQNCDQFEK.L		2		785.7214	2354.1425	2354.1325	4.25	1	39	66649.1	1	13998
	K.HLVDEPQNLIKQNCDQFEK.L		1		1178.0820	2354.1495	2354.1325	7.23	1	(14)	-23925.3	1	14000
	K.DAIPENLPPLTADFAEDKDVCK.N		4		820.0700	2457.1882	2457.1733	6.05	1	74	126462	1	14511
	K.DAIPENLPPLTADFAEDKDVCK.N		1		1229.6027	2457.1908	2457.1733	7.09	1	(8)	-13671.6	1	14515
	K.YNGVFQECCQAEDKGACLLPK.I		3		829.7151	2486.1236	2486.1028	8.36	1	36	61522.3	1	14670
	K.GLVLIAFSQYLQQCPFDEHVK.L		1		831.4324	2491.2755	2491.2570	7.42	0	3	5126.86	1	14693
	K.AFDEKLFTFHADICTLPDTEK.Q		2		625.3081	2497.2033	2497.1835	7.93	1	(29)	-49559.6	1	14709
	K.AFDEKLFTFHADICTLPDTEK.Q		2		833.4085	2497.2035	2497.1835	8.00	1	62	105955	1	14710
	K->.<-QEPERNECFLSHKDDSPDLPK.L		2	Gln->pyro-Glu (N-term Q)	842.0568	2523.1485	2523.1336	5.88	2	(6)	-10253.7	1	14892
	K.QEPERNECFLSHKDDSPDLPK.L		3		847.7332	2540.1778	2540.1601	6.96	2	28	47850.7	1	14996
	K.QEPERNECFLSHKDDSPDLPK.L		3		636.0518	2540.1782	2540.1601	7.10	2	(23)	-39305.9	1	14998
	K.VHKECCHGDLLECADDRADLAK.Y		2		871.3973	2611.1700	2611.1577	4.70	2	55	93992.4	1	15300
	K.VHKECCHGDLLECADDRADLAK.Y		1		653.7999	2611.1706	2611.1577	4.93	2	(10)	-17089.5	1	15301
	K.VHKECCHGDLLECADDRADLAK.Y		3		523.2415	2611.1709	2611.1577	5.05	2	(10)	-17089.5	1	15302
	K.SHCIAEVEKDAIPENLPPLTADFAEDK.D		2		1003.8265	3008.4576	3008.4437	4.63	1	48	82029.7	1	16534
	K.DAIPENLPPLTADFAEDKDVCKNYQEAK.D		1		798.6398	3190.5302	3190.5128	5.45	2	(12)	-20507.4	1	16909
	K.DAIPENLPPLTADFAEDKDVCKNYQEAK.D		1		1064.5177	3190.5313	3190.5128	5.78	2	21	35888	1	16910
	K.SHCIAEVEKDAIPENLPPLTADFAEDKDVCK.N		2		1171.2368	3510.6886	3510.6647	6.83	2	68	116209	1	17576
	K.SHCIAEVEKDAIPENLPPLTADFAEDKDVCK.N		3		703.1450	3510.6887	3510.6647	6.85	2	(46)	-78611.8	1	17577
	K.SHCIAEVEKDAIPENLPPLTADFAEDKDVCK.N		1		878.6796	3510.6894	3510.6647	7.05	2	(43)	-73484.9	1	17578
Q29443	Serotransferrin OS=Bos taurus GN=TF PE=2 SV=1	79870	4886	221(167)	61(55)	28.32	75%	Q29443_uniprot		0.002767	4.72866	-0.452	6.75
	Peptide	Unique	Matches	Modification	Observed	Mr(expt)	Mr(calc)	ppm	Miss	Score	#VALUE!	Rank	Query
	K.GDVAFVK.D		3		368.2075	734.4004	734.3963	5.54	0	29	49559.6	1	85
	K.CLASIAK.K		2		381.7145	761.4144	761.4105	5.08	0	39	66649.1	1	169
	K.DSADGFLK.I		3		426.7108	851.4069	851.4025	5.23	0	48	82029.7	1	671
	K.GYLAVAVVK.T		2		460.2867	918.5589	918.5538	5.53	0	39	66649.1	1	1013
	R.GPNHAVVSR.K		1		468.7558	935.4970	935.4937	3.50	0	28	47850.7	1	1092
	K.LCQLCAGK.G		2		475.2356	948.4566	948.4521	4.73	0	52	88865.5	1	1181
	K.TSHMDCIK.A		1		496.2233	990.4320	990.4263	5.82	0	12	20507.4	1	1467
	K.KSCHTGLGR.S		1		508.2610	1014.5074	1014.5029	4.46	1	47	80320.7	1	1666
	K.ENFEVLCK.D		3		519.7531	1037.4915	1037.4852	6.15	0	34	58104.4	1	1869
	K.KSCHTAVDR.T		1		358.5117	1072.5132	1072.5084	4.45	1	23	39305.9	1	2165
	R.YYGYTGAFR.C		6		549.2596	1096.5047	1096.4978	6.33	0	42	71776	1	2405
	K.KTSHMDCIK.A		1		373.8496	1118.5271	1118.5212	5.23	1	21	35888	1	2639
	K.DLLFRDDTK.C		2		374.8660	1121.5762	1121.5717	4.00	1	(12)	-20507.4	1	2684
	K.DLLFRDDTK.C		4		561.7961	1121.5776	1121.5717	5.28	1	34	58104.4	1	2686
	K.WCAIGHQER.T		2		386.1844	1155.5313	1155.5244	5.97	0	36	61522.3	1	3046
	K.WCAIGHQER.T		1		578.7732	1155.5318	1155.5244	6.47	0	(30)	-51268.6	1	3047
	K.KENFEVLCK.D		1		583.8006	1165.5866	1165.5801	5.60	1	53	90574.5	1	3189
	K.LLEACTFHKP.-		4		405.8802	1214.6187	1214.6118	5.67	0	(27)	-46141.7	1	3868
	K.LLEACTFHKP.-		3		608.3170	1214.6195	1214.6118	6.35	0	29	49559.6	1	3870
	K.DTDFKLNELR.G		2		417.5533	1249.6381	1249.6302	6.28	1	(38)	-64940.2	1	4253
	K.DTDFKLNELR.G		2		625.8264	1249.6381	1249.6302	6.32	1	56	95701.3	1	4254
	K.DSADGFLKIPSK.M		2		639.3438	1276.6729	1276.6663	5.20	1	45	76902.8	1	4610
	K.DSADGFLKIPSK.M		2		426.5650	1276.6731	1276.6663	5.31	1	(42)	-71776	1	4611
	K.ILNKQQDDFGK.S		2		435.8999	1304.6779	1304.6725	4.15	1	(55)	-93992.4	1	4987
	K.ILNKQQDDFGK.S		1		653.3464	1304.6783	1304.6725	4.50	1	80	136716	1	4988
	K.ELPDPQESIQR.A		4		656.3351	1310.6556	1310.6466	6.86	0	56	95701.3	1	5068
	R.ILESGPFVSCVK.K		5		668.3565	1334.6983	1334.6904	5.93	0	82	140134	1	5346
	R.WCTISTHEANK.C		2		449.5456	1345.6149	1345.6085	4.74	0	(30)	-51268.6	1	5470
	R.WCTISTHEANK.C		2		673.8149	1345.6152	1345.6085	5.00	0	49	83738.6	1	5471
	K.NYELLCGDNTR.K		2		677.8109	1353.6073	1353.5983	6.63	0	47	80320.7	1	5570
	K.CGLVPVLAENYK.T		4		681.8622	1361.7099	1361.7013	6.33	0	80	136716	1	5690
	R.CLVEKGDVAFVK.D		1		682.8679	1363.7213	1363.7170	3.16	1	(23)	-39305.9	1	5712
	R.CLVEKGDVAFVK.D		2		455.5821	1363.7245	1363.7170	5.54	1	49	83738.6	1	5714
	K.KDTDFKLNELR.G		2		689.8733	1377.7320	1377.7252	4.95	2	75	128171	1	5805
	K.KDTDFKLNELR.G		1		460.2525	1377.7356	1377.7252	7.53	2	(51)	-87156.6	1	5807
	K.TSDANINWNNLK.D		3		695.3451	1388.6756	1388.6684	5.20	0	73	124753	1	5944
	K.CLMEGAGDVAFVK.H		4		698.8388	1395.6631	1395.6527	7.45	0	73	124753	1	6049
	K.CL->M<-EGAGDVAFVK.H		4	Oxidation (M)	706.8371	1411.6596	1411.6476	8.55	0	(14)	-23925.3	1	6230
	K.GTGKECVPNSNER.Y		1		724.3365	1446.6584	1446.6521	4.35	1	(18)	-30761.1	1	6656
	K.GTGKECVPNSNER.Y		1		483.2270	1446.6591	1446.6521	4.85	1	30	51268.6	1	6657
	R.ILESGPFVSCVKK.T		2		488.6054	1462.7945	1462.7854	6.23	1	(62)	-105955	1	6873
	R.ILESGPFVSCVKK.T		3		732.4047	1462.7948	1462.7854	6.41	1	71	121336	1	6875
	K.TYDSYLGDDYVR.A		4		733.8310	1465.6474	1465.6361	7.70	0	79	135007	1	6906
	K.ENFEVLCKDGTR.K		1		734.3535	1466.6925	1466.6824	6.90	1	22	37596.9	1	6914
	K.DLLFKDSADGFLK.I		2		490.2636	1467.7691	1467.7609	5.55	1	66	112791	1	6936
	K.NYELLCGDNTRK.S		2		494.9081	1481.7025	1481.6933	6.24	1	(23)	-39305.9	1	7157
	K.NYELLCGDNTRK.S		2		741.8586	1481.7027	1481.6933	6.39	1	45	76902.8	1	7159
	R.KNYELLCGDNTR.K		2		741.8590	1481.7035	1481.6933	6.89	1	64	109373	1	7161
	R.KNYELLCGDNTR.K		3		494.9086	1481.7040	1481.6933	7.23	1	(53)	-90574.5	1	7162
	K.NTPEKGYLAVAVVK.T		2		496.9547	1487.8423	1487.8348	5.07	1	(56)	-95701.3	1	7211
	K.NTPEKGYLAVAVVK.T		2		744.9302	1487.8459	1487.8348	7.50	1	61	104246	1	7213
	R.KPVTDAENCHLAR.G		1		755.8782	1509.7419	1509.7358	4.05	0	(76)	-129880	1	7445
	R.KPVTDAENCHLAR.G		1		378.4429	1509.7424	1509.7358	4.36	0	(62)	-105955	1	7446
	R.KPVTDAENCHLAR.G		1		504.2553	1509.7442	1509.7358	5.56	0	82	140134	1	7447
	R.TAGWNIPMGLLYSK.I		2		775.9089	1549.8033	1549.7963	4.56	0	51	87156.6	1	7820
	K.KTYDSYLGDDYVR.A		2		797.8786	1593.7426	1593.7311	7.25	1	98	167477	1	8312
	K.KTYDSYLGDDYVR.A		2		532.2553	1593.7441	1593.7311	8.16	1	(48)	-82029.7	1	8313
	K.DNPQTHYYAVAVVK.K		4		802.9106	1603.8067	1603.7995	4.54	0	68	116209	1	8425
	R.KNYELLCGDNTRK.S		1		537.6072	1609.7999	1609.7882	7.26	2	21	35888	1	8468
	K.TSDANINWNNLKDK.K	U	2		816.9056	1631.7967	1631.7903	3.93	1	68	116209	1	8690
	K.TSDANINWNNLKDK.K	U	1		544.9404	1631.7993	1631.7903	5.50	1	(23)	-39305.9	1	8691
	K.HSTVFDNLPNPEDR.K		5		820.8922	1639.7697	1639.7590	6.53	0	103	176022	1	8795
	K.HSTVFDNLPNPEDR.K		5		547.5978	1639.7715	1639.7590	7.60	0	(63)	-107664	1	8797
	K.FDEFFSAGCAPGSPR.N		3		822.8654	1643.7163	1643.7039	7.56	0	72	123045	1	8815
	K.FDEFFSAGCAPGSPR.N		1		548.9130	1643.7172	1643.7039	8.14	0	(29)	-49559.6	1	8816
	K.LYKELPDPQESIQR.A		4		572.6393	1714.8962	1714.8890	4.22	1	61	104246	1	9454
	K.LYKELPDPQESIQR.A		4		858.4556	1714.8967	1714.8890	4.52	1	(49)	-83738.6	1	9456
	R.ESKPPDSSKDECMVK.W		2		579.6019	1735.7838	1735.7757	4.68	1	(11)	-18798.5	1	9588
	R.ESKPPDSSKDECMVK.W		1		868.8994	1735.7843	1735.7757	4.96	1	(28)	-47850.7	1	9589
	R.ESKPPDSSKDECMVK.W		1		434.9536	1735.7855	1735.7757	5.64	1	52	88865.5	1	9590
	K.DKPDNFQLFQSPHGK.D		3		879.4377	1756.8608	1756.8533	4.28	0	77	131589	1	9701
	K.DKPDNFQLFQSPHGK.D		4		586.6278	1756.8616	1756.8533	4.73	0	(41)	-70067	1	9703
	K.DKPDNFQLFQSPHGK.D		3		440.2229	1756.8626	1756.8533	5.31	0	(32)	-54686.5	1	9707
	K.HSTVFDNLPNPEDRK.N		4		884.9396	1767.8646	1767.8540	6.00	1	62	105955	1	9777
	K.HSTVFDNLPNPEDRK.N		4		590.2956	1767.8649	1767.8540	6.19	1	(56)	-95701.3	1	9780
	K.GEADAMSLDGGYLYIAGK.C		4		915.9375	1829.8604	1829.8505	5.41	0	97	165768	1	10187
	K.DGTRKPVTDAENCHLAR.G		1		485.7417	1938.9377	1938.9330	2.42	1	73	124753	1	11106
	K.DGTRKPVTDAENCHLAR.G		1		647.3205	1938.9397	1938.9330	3.44	1	(62)	-105955	1	11107
	K.CACSNHEPYFGYSGAFK.C		1		997.9169	1993.8192	1993.8087	5.25	0	13	22216.4	1	11530
	K.SVTDCTSNFCLFQSNSK.D		1		665.6271	1993.8596	1993.8510	4.31	0	(47)	-80320.7	1	11534
	K.SVTDCTSNFCLFQSNSK.D		3		997.9374	1993.8602	1993.8510	4.62	0	120	205074	1	11535
	K.DQTVIQNTDGNNNEAWAK.N		1		673.3151	2016.9234	2016.9137	4.79	0	(58)	-99119.2	1	11704
	K.DQTVIQNTDGNNNEAWAK.N		4		1009.4694	2016.9242	2016.9137	5.19	0	92	157224	1	11705
	K.CGLVPVLAENYKTEGESCK.N	U	3		718.6828	2153.0266	2153.0133	6.18	1	51	87156.6	1	12670
	K.IMKGEADAMSLDGGYLYIAGK.C		2		735.0344	2202.0814	2202.0700	5.17	1	63	107664	1	12919
	K.IMKGEADAMSLDGGYLYIAGK.C		1		1102.0488	2202.0831	2202.0700	5.94	1	(2)	-3417.9	1	12920
	K.IMKGEADA->M<-SLDGGYLYIAGK.C		1	Oxidation (M)	740.3676	2218.0808	2218.0650	7.15	1	(31)	-52977.5	1	13002
	R.AAANFFSASCVPCADQSSFPK.L		2		1131.5107	2261.0069	2260.9881	8.31	0	57	97410.3	1	13320
	R.AAANFFSASCVPCADQSSFPK.L		2		754.6763	2261.0072	2260.9881	8.41	0	(23)	-39305.9	1	13321
	K.INNCKFDEFFSAGCAPGSPR.N		2		758.6791	2273.0156	2272.9994	7.14	1	36	61522.3	1	13414
	K.SVDDYQECYLAMVPSHAVVAR.T	U	3		804.0491	2409.1254	2409.1093	6.67	0	71	121336	1	14302
	K.SVDDYQECYLAMVPSHAVVAR.T	U	2		1205.5731	2409.1317	2409.1093	9.29	0	(41)	-70067	1	14305
	K.SVDDYQECYLA->M<-VPSHAVVAR.T	U	2	Oxidation (M)	809.3839	2425.1297	2425.1042	10.5	0	(1)	-1708.95	1	14374
	R.WSGFSGGAIECETAENTEECIAK.I		1		1273.5496	2545.0846	2545.0737	4.27	0	12	20507.4	1	15020
	K.GDVAFVKDQTVIQNTDGNNNEAWAK.N		3		912.1140	2733.3202	2733.2994	7.60	1	102	174313	1	15875
	R.CLVEKGDVAFVKDQTVIQNTDGNNNEAWAK.N		2		841.6693	3362.6481	3362.6201	8.33	2	65	111082	1	17244
	R.CLVEKGDVAFVKDQTVIQNTDGNNNEAWAK.N		1		1121.8903	3362.6490	3362.6201	8.58	2	(52)	-88865.5	1	17245
G3X6N3	Serotransferrin OS=Bos taurus GN=TF PE=3 SV=1	79783	4773	218(164)	61(53)	24.07	76%	G3X6N3_uniprot		0.00273241	4.66956	-0.451	7.13
	Peptide	Unique	Matches	Modification	Observed	Mr(expt)	Mr(calc)	ppm	Miss	Score	#VALUE!	Rank	Query
	K.GDVAFVK.D		3		368.2075	734.4004	734.3963	5.54	0	29	49559.6	1	85
	K.CLASIAK.K		2		381.7145	761.4144	761.4105	5.08	0	39	66649.1	1	169
	K.DSADGFLK.I		3		426.7108	851.4069	851.4025	5.23	0	48	82029.7	1	671
	K.GYLAVAVVK.T		2		460.2867	918.5589	918.5538	5.53	0	39	66649.1	1	1013
	R.GPNHAVVSR.K		1		468.7558	935.4970	935.4937	3.50	0	28	47850.7	1	1092
	K.LCQLCAGK.G		2		475.2356	948.4566	948.4521	4.73	0	52	88865.5	1	1181
	K.TSHMDCIK.A		1		496.2233	990.4320	990.4263	5.82	0	12	20507.4	1	1467
	K.KSCHTGLGR.S		1		508.2610	1014.5074	1014.5029	4.46	1	47	80320.7	1	1666
	K.ENFEVLCK.D		3		519.7531	1037.4915	1037.4852	6.15	0	34	58104.4	1	1869
	R.SAGWNIPMGK.L	U	4		530.7698	1059.5250	1059.5171	7.43	0	60	102537	1	2072
	K.KSCHTAVDR.T		1		358.5117	1072.5132	1072.5084	4.45	1	23	39305.9	1	2165
	R.SAGWNIP->M<-GK.L	U	2	Oxidation (M)	538.7673	1075.5201	1075.5121	7.49	0	(23)	-39305.9	1	2184
	R.YYGYTGAFR.C		6		549.2596	1096.5047	1096.4978	6.33	0	42	71776	1	2405
	K.KTSHMDCIK.A		1		373.8496	1118.5271	1118.5212	5.23	1	21	35888	1	2639
	K.DLLFRDDTK.C		2		374.8660	1121.5762	1121.5717	4.00	1	(12)	-20507.4	1	2684
	K.DLLFRDDTK.C		4		561.7961	1121.5776	1121.5717	5.28	1	34	58104.4	1	2686
	K.WCAIGHQER.T		2		386.1844	1155.5313	1155.5244	5.97	0	36	61522.3	1	3046
	K.WCAIGHQER.T		1		578.7732	1155.5318	1155.5244	6.47	0	(30)	-51268.6	1	3047
	K.KENFEVLCK.D		1		583.8006	1165.5866	1165.5801	5.60	1	53	90574.5	1	3189
	K.LLEACTFHKP.-		4		405.8802	1214.6187	1214.6118	5.67	0	(27)	-46141.7	1	3868
	K.LLEACTFHKP.-		3		608.3170	1214.6195	1214.6118	6.35	0	29	49559.6	1	3870
	K.DTDFKLNELR.G		2		417.5533	1249.6381	1249.6302	6.28	1	(38)	-64940.2	1	4253
	K.DTDFKLNELR.G		2		625.8264	1249.6381	1249.6302	6.32	1	56	95701.3	1	4254
	K.DSADGFLKIPSK.M		2		639.3438	1276.6729	1276.6663	5.20	1	45	76902.8	1	4610
	K.DSADGFLKIPSK.M		2		426.5650	1276.6731	1276.6663	5.31	1	(42)	-71776	1	4611
	K.ILNKQQDDFGK.S		2		435.8999	1304.6779	1304.6725	4.15	1	(55)	-93992.4	1	4987
	K.ILNKQQDDFGK.S		1		653.3464	1304.6783	1304.6725	4.50	1	80	136716	1	4988
	K.ELPDPQESIQR.A		4		656.3351	1310.6556	1310.6466	6.86	0	56	95701.3	1	5068
	R.ILESGPFVSCVK.K		5		668.3565	1334.6983	1334.6904	5.93	0	82	140134	1	5346
	R.WCTISTHEANK.C		2		449.5456	1345.6149	1345.6085	4.74	0	(30)	-51268.6	1	5470
	R.WCTISTHEANK.C		2		673.8149	1345.6152	1345.6085	5.00	0	49	83738.6	1	5471
	K.NYELLCGDNTR.K		2		677.8109	1353.6073	1353.5983	6.63	0	47	80320.7	1	5570
	K.CGLVPVLAENYK.T		4		681.8622	1361.7099	1361.7013	6.33	0	80	136716	1	5690
	R.CLVEKGDVAFVK.D		1		682.8679	1363.7213	1363.7170	3.16	1	(23)	-39305.9	1	5712
	R.CLVEKGDVAFVK.D		2		455.5821	1363.7245	1363.7170	5.54	1	49	83738.6	1	5714
	K.KDTDFKLNELR.G		2		689.8733	1377.7320	1377.7252	4.95	2	75	128171	1	5805
	K.KDTDFKLNELR.G		1		460.2525	1377.7356	1377.7252	7.53	2	(51)	-87156.6	1	5807
	K.TSDANINWNNLK.G		3		695.3451	1388.6756	1388.6684	5.20	0	73	124753	1	5944
	K.CLMEGAGDVAFVK.H		4		698.8388	1395.6631	1395.6527	7.45	0	73	124753	1	6049
	K.CL->M<-EGAGDVAFVK.H		4	Oxidation (M)	706.8371	1411.6596	1411.6476	8.55	0	(14)	-23925.3	1	6230
	K.GTGKECVPNSNER.Y		1		724.3365	1446.6584	1446.6521	4.35	1	(18)	-30761.1	1	6656
	K.GTGKECVPNSNER.Y		1		483.2270	1446.6591	1446.6521	4.85	1	30	51268.6	1	6657
	R.ILESGPFVSCVKK.T		2		488.6054	1462.7945	1462.7854	6.23	1	(62)	-105955	1	6873
	R.ILESGPFVSCVKK.T		3		732.4047	1462.7948	1462.7854	6.41	1	71	121336	1	6875
	K.TYDSYLGDDYVR.A		4		733.8310	1465.6474	1465.6361	7.70	0	79	135007	1	6906
	K.ENFEVLCKDGTR.K		1		734.3535	1466.6925	1466.6824	6.90	1	22	37596.9	1	6914
	K.DLLFKDSADGFLK.I		2		490.2636	1467.7691	1467.7609	5.55	1	66	112791	1	6936
	K.NYELLCGDNTRK.S		2		494.9081	1481.7025	1481.6933	6.24	1	(23)	-39305.9	1	7157
	K.NYELLCGDNTRK.S		2		741.8586	1481.7027	1481.6933	6.39	1	45	76902.8	1	7159
	R.KNYELLCGDNTR.K		2		741.8590	1481.7035	1481.6933	6.89	1	64	109373	1	7161
	R.KNYELLCGDNTR.K		3		494.9086	1481.7040	1481.6933	7.23	1	(53)	-90574.5	1	7162
	K.NTPEKGYLAVAVVK.T		2		496.9547	1487.8423	1487.8348	5.07	1	(56)	-95701.3	1	7211
	K.NTPEKGYLAVAVVK.T		2		744.9302	1487.8459	1487.8348	7.50	1	61	104246	1	7213
	R.KPVTDAENCHLAR.G		1		755.8782	1509.7419	1509.7358	4.05	0	(76)	-129880	1	7445
	R.KPVTDAENCHLAR.G		1		378.4429	1509.7424	1509.7358	4.36	0	(62)	-105955	1	7446
	R.KPVTDAENCHLAR.G		1		504.2553	1509.7442	1509.7358	5.56	0	82	140134	1	7447
	R.TAGWNIPMGLLYSK.I		2		775.9089	1549.8033	1549.7963	4.56	0	51	87156.6	1	7820
	K.KTYDSYLGDDYVR.A		2		797.8786	1593.7426	1593.7311	7.25	1	98	167477	1	8312
	K.KTYDSYLGDDYVR.A		2		532.2553	1593.7441	1593.7311	8.16	1	(48)	-82029.7	1	8313
	K.DNPQTHYYAVAVVK.K		4		802.9106	1603.8067	1603.7995	4.54	0	68	116209	1	8425
	R.KNYELLCGDNTRK.S		1		537.6072	1609.7999	1609.7882	7.26	2	21	35888	1	8468
	K.HSTVFDNLPNPEDR.K		5		820.8922	1639.7697	1639.7590	6.53	0	103	176022	1	8795
	K.HSTVFDNLPNPEDR.K		5		547.5978	1639.7715	1639.7590	7.60	0	(63)	-107664	1	8797
	K.FDEFFSAGCAPGSPR.N		3		822.8654	1643.7163	1643.7039	7.56	0	72	123045	1	8815
	K.FDEFFSAGCAPGSPR.N		1		548.9130	1643.7172	1643.7039	8.14	0	(29)	-49559.6	1	8816
	K.LYKELPDPQESIQR.A		4		572.6393	1714.8962	1714.8890	4.22	1	61	104246	1	9454
	K.LYKELPDPQESIQR.A		4		858.4556	1714.8967	1714.8890	4.52	1	(49)	-83738.6	1	9456
	R.ESKPPDSSKDECMVK.W		2		579.6019	1735.7838	1735.7757	4.68	1	(11)	-18798.5	1	9588
	R.ESKPPDSSKDECMVK.W		1		868.8994	1735.7843	1735.7757	4.96	1	(28)	-47850.7	1	9589
	R.ESKPPDSSKDECMVK.W		1		434.9536	1735.7855	1735.7757	5.64	1	52	88865.5	1	9590
	K.DKPDNFQLFQSPHGK.D		3		879.4377	1756.8608	1756.8533	4.28	0	77	131589	1	9701
	K.DKPDNFQLFQSPHGK.D		4		586.6278	1756.8616	1756.8533	4.73	0	(41)	-70067	1	9703
	K.DKPDNFQLFQSPHGK.D		3		440.2229	1756.8626	1756.8533	5.31	0	(32)	-54686.5	1	9707
	K.HSTVFDNLPNPEDRK.N		4		884.9396	1767.8646	1767.8540	6.00	1	62	105955	1	9777
	K.HSTVFDNLPNPEDRK.N		4		590.2956	1767.8649	1767.8540	6.19	1	(56)	-95701.3	1	9780
	K.GEADAMSLDGGYLYIAGK.C		4		915.9375	1829.8604	1829.8505	5.41	0	97	165768	1	10187
	K.DGTRKPVTDAENCHLAR.G		1		485.7417	1938.9377	1938.9330	2.42	1	73	124753	1	11106
	K.DGTRKPVTDAENCHLAR.G		1		647.3205	1938.9397	1938.9330	3.44	1	(62)	-105955	1	11107
	K.CACSNHEPYFGYSGAFK.C		1		997.9169	1993.8192	1993.8087	5.25	0	13	22216.4	1	11530
	K.SVTDCTSNFCLFQSNSK.D		1		665.6271	1993.8596	1993.8510	4.31	0	(47)	-80320.7	1	11534
	K.SVTDCTSNFCLFQSNSK.D		3		997.9374	1993.8602	1993.8510	4.62	0	120	205074	1	11535
	K.DQTVIQNTDGNNNEAWAK.N		1		673.3151	2016.9234	2016.9137	4.79	0	(58)	-99119.2	1	11704
	K.DQTVIQNTDGNNNEAWAK.N		4		1009.4694	2016.9242	2016.9137	5.19	0	92	157224	1	11705
	K.CGLVPVLAENYKTEDGSCK.N	U	2		714.0118	2139.0135	2138.9976	7.42	1	14	23925.3	1	12591
	K.IMKGEADAMSLDGGYLYIAGK.C		2		735.0344	2202.0814	2202.0700	5.17	1	63	107664	1	12919
	K.IMKGEADAMSLDGGYLYIAGK.C		1		1102.0488	2202.0831	2202.0700	5.94	1	(2)	-3417.9	1	12920
	K.IMKGEADA->M<-SLDGGYLYIAGK.C		1	Oxidation (M)	740.3676	2218.0808	2218.0650	7.15	1	(31)	-52977.5	1	13002
	R.AAANFFSASCVPCADQSSFPK.L		2		1131.5107	2261.0069	2260.9881	8.31	0	57	97410.3	1	13320
	R.AAANFFSASCVPCADQSSFPK.L		2		754.6763	2261.0072	2260.9881	8.41	0	(23)	-39305.9	1	13321
	K.INNCKFDEFFSAGCAPGSPR.N		2		758.6791	2273.0156	2272.9994	7.14	1	36	61522.3	1	13414
	K.SVDNYQECYLAMVPSHAVVAR.T	U	2		803.7195	2408.1368	2408.1253	4.78	0	18	30761.1	1	14295
	R.WSGFSGGAIECETAENTEECIAK.I		1		1273.5496	2545.0846	2545.0737	4.27	0	12	20507.4	1	15020
	K.GDVAFVKDQTVIQNTDGNNNEAWAK.N		3		912.1140	2733.3202	2733.2994	7.60	1	102	174313	1	15875
	R.CLVEKGDVAFVKDQTVIQNTDGNNNEAWAK.N		2		841.6693	3362.6481	3362.6201	8.33	2	65	111082	1	17244
	R.CLVEKGDVAFVKDQTVIQNTDGNNNEAWAK.N		1		1121.8903	3362.6490	3362.6201	8.58	2	(52)	-88865.5	1	17245
K4JF16	Alpha-2-macroglobulin variant 23 OS=Bos taurus GN=A2M PE=2 SV=1	102208	4671	274(193)	49(45)	7.26	60%	K4JF16_uniprot		0.00268081	4.58137	-0.203	5.68
	Peptide	Unique	Matches	Modification	Observed	Mr(expt)	Mr(calc)	ppm	Miss	Score	#VALUE!	Rank	Query
	R.GIPFTGK.V		4		360.2100	718.4055	718.4014	5.72	0	29	49559.6	1	35
	K.GTSLSIR.V		2		367.2158	732.4170	732.4130	5.43	0	30	51268.6	1	75
	K.GVPMPNK.V		1		371.7007	741.3868	741.3843	3.33	0	19	32470.1	1	89
	K.VLLVDGK.G		3		372.2387	742.4629	742.4589	5.35	0	42	71776	1	91
	R.GEAFTLK.A		4		383.2127	764.4108	764.4068	5.18	0	39	66649.1	1	184
	K.FEVQVR.M		3		389.2189	776.4232	776.4181	6.56	0	46	78611.8	1	227
	R.QEFEMK.I		1		406.1888	406.1888	810.3631	6.04	0	6	10253.7	2	423
	K.AGALCLSR.D		4		424.2296	846.4445	846.4382	7.55	0	61	104246	1	635
	R.RGIPFTGK.V		2		438.2606	874.5067	874.5025	4.80	1	60	102537	1	781
	R.DLKPAIVK.V		4		442.2871	882.5597	882.5538	6.68	0	35	59813.3	1	851
	K.GQVLKDLK.E		1		450.7824	899.5501	899.5440	6.83	1	33	56395.4	1	906
	R.VTMNMCR.K		2		456.2004	910.3863	910.3823	4.41	0	39	66649.1	1	962
	K.RQEFEMK.I		2		484.2389	966.4632	966.4593	4.03	1	42	71776	1	1282
	K.IKGTSLSIR.V		2		487.8065	973.5984	973.5920	6.59	1	29	49559.6	1	1331
	K.RQEFE->M<-K.I		3	Oxidation (M)	492.2372	982.4599	982.4542	5.84	1	(8)	-13671.6	1	1399
	K.ATVLNYLPK.C		5		509.8037	1017.5928	1017.5859	6.83	0	38	64940.2	1	1703
	R.SLFTDVVAEK.D		5		554.8014	1107.5882	1107.5812	6.35	0	64	109373	1	2511
	K.GATEITTTITK.L		6		568.3167	1134.6189	1134.6132	4.98	0	62	105955	1	2838
	K.LSFVTVDSNLR.R		1		417.5643	1249.6711	1249.6667	3.53	0	(30)	-51268.6	1	4261
	K.LSFVTVDSNLR.R		9		625.8439	1249.6732	1249.6667	5.23	0	60	102537	1	4264
	R.DTGLGLSPTASLR.V		9		644.3530	1286.6914	1286.6830	6.50	0	66	112791	1	4721
	K.TQTVQAHYVLK.G		3		644.3597	1286.7048	1286.6983	5.07	0	60	102537	1	4731
	K.TQTVQAHYVLK.G		2		429.9090	1286.7052	1286.6983	5.35	0	(21)	-35888	1	4733
	R.VTASPQSLCALR.A		2		651.8483	1301.6821	1301.6762	4.57	0	82	140134	1	4924
	R.YEVEHCLDNK.V		2		653.7934	1305.5722	1305.5659	4.84	0	67	114500	1	5006
	R.YEVEHCLDNK.V		2		436.1980	1305.5723	1305.5659	4.85	0	(22)	-37596.9	1	5007
	R.IQHHTLLASPVR.A		3		686.3997	1370.7848	1370.7783	4.75	0	(47)	-80320.7	1	5746
	R.IQHHTLLASPVR.A		4		457.9363	1370.7872	1370.7783	6.52	0	50	85447.6	1	5751
	K.LSFVTVDSNLRR.G		4		469.5989	1405.7747	1405.7678	4.95	1	41	70067	1	6168
	K.LSFVTVDSNLRR.G		3		703.8949	1405.7752	1405.7678	5.33	1	(25)	-42723.8	1	6169
	R.SNSFVYLEPLPR.E		2		474.5877	1420.7411	1420.7350	4.28	0	60	102537	1	6358
	R.SNSFVYLEPLPR.E		5		711.3787	1420.7429	1420.7350	5.52	0	(58)	-99119.2	1	6362
	K.IQEEGTEVELTGK.G		1		478.2458	1431.7156	1431.7093	4.43	0	(23)	-39305.9	1	6467
	K.IQEEGTEVELTGK.G		9		716.8666	1431.7186	1431.7093	6.51	0	77	131589	1	6477
	K.DMYSFLQDMGLK.A		2		724.3398	1446.6650	1446.6523	8.78	0	(72)	-123045	1	6660
	K.DMYSFLQD->M<-GLK.A		2	Oxidation (M)	732.3345	1462.6545	1462.6472	4.97	0	(45)	-76902.8	1	6864
	K.D->M<-YSFLQDMGLK.A		3	Oxidation (M)	732.3354	1462.6562	1462.6472	6.15	0	72	123045	1	6865
	K.DLFHCVSFTLPR.S		2		497.9211	1490.7414	1490.7340	4.95	0	38	64940.2	1	7231
	R.TEVSNNHVLIYLDK.V		3		822.9370	1643.8593	1643.8519	4.55	0	80	136716	1	8824
	R.TEVSNNHVLIYLDK.V		2		548.9612	1643.8617	1643.8519	5.99	0	(35)	-59813.3	1	8825
	R.SPTSQEVMFLTIQVK.G		3		854.4581	1706.9016	1706.8913	6.02	0	(57)	-97410.3	1	9373
	R.SPTSQEVMFLTIQVK.G		2		569.9746	1706.9020	1706.8913	6.26	0	(6)	-10253.7	1	9374
	R.SPTSQEV->M<-FLTIQVK.G		3	Oxidation (M)	862.4545	1722.8944	1722.8862	4.74	0	98	167477	1	9507
	R.NPSNCYGEESNAVCEK.F		2		929.3733	1856.7320	1856.7305	0.82	0	93	158933	1	10384
	R.LLIYAILPDGEVVGDSAR.Y		16		951.0292	1900.0438	1900.0306	6.96	0	(64)	-109373	1	10761
	R.LLIYAILPDGEVVGDSAR.Y		4		634.3560	1900.0461	1900.0306	8.15	0	64	109373	1	10766
	R.DFVHFDDTSEPPTETVR.K		8		664.6417	1990.9033	1990.8909	6.25	0	(50)	-85447.6	1	11497
	R.DFVHFDDTSEPPTETVR.K		9		996.4595	1990.9044	1990.8909	6.78	0	91	155515	1	11498
	K.GSGGTAEHPFTVEEFVLPK.F		4		1001.5069	2000.9992	2000.9844	7.43	0	50	85447.6	1	11585
	K.GSGGTAEHPFTVEEFVLPK.F		4		668.0073	2001.0000	2000.9844	7.78	0	(44)	-75193.9	1	11587
	K.VGLNFSPGQSFPASQAHLR.V		2		1007.0245	2012.0345	2012.0228	5.82	0	(22)	-37596.9	1	11642
	K.VGLNFSPGQSFPASQAHLR.V		3		671.6857	2012.0352	2012.0228	6.15	0	90	153806	1	11643
	K.FSGQLNNEGCFSQQVNTK.I		1		686.6531	2056.9374	2056.9273	4.94	0	(29)	-49559.6	1	12014
	K.FSGQLNNEGCFSQQVNTK.I		1		1029.4769	2056.9393	2056.9273	5.86	0	99	169186	1	12015
	R.DFVHFDDTSEPPTETVRK.Y		4		707.3362	2118.9867	2118.9858	0.41	1	(25)	-42723.8	1	12421
	R.DFVHFDDTSEPPTETVRK.Y		2		530.7562	2118.9958	2118.9858	4.71	1	(24)	-41014.8	1	12422
	R.DFVHFDDTSEPPTETVRK.Y		1		1060.5062	2118.9979	2118.9858	5.70	1	33	56395.4	1	12424
	K.YRNPSNCYGEESNAVCEK.F		1		726.3102	2175.9089	2175.8949	6.42	1	54	92283.4	1	12779
	K.YRNPSNCYGEESNAVCEK.F		1		1088.9624	2175.9102	2175.8949	7.04	1	(2)	-3417.9	1	12780
	R.NRDFVHFDDTSEPPTETVR.K		7		1131.5316	2261.0487	2261.0349	6.09	1	(62)	-105955	1	13334
	R.NRDFVHFDDTSEPPTETVR.K		7		566.2700	2261.0510	2261.0349	7.10	1	(35)	-59813.3	1	13342
	R.NRDFVHFDDTSEPPTETVR.K		8		754.6911	2261.0515	2261.0349	7.32	1	87	148679	1	13343
	R.NRDFVHFDDTSEPPTETVRK.Y		1		1195.5780	2389.1414	2389.1299	4.85	2	(11)	-18798.5	1	14173
	R.NRDFVHFDDTSEPPTETVRK.Y		8		797.3882	2389.1429	2389.1299	5.45	2	68	116209	1	14177
	R.NRDFVHFDDTSEPPTETVRK.Y		3		478.8360	2389.1435	2389.1299	5.69	2	(11)	-18798.5	1	14179
	R.NRDFVHFDDTSEPPTETVRK.Y		7		598.2936	2389.1455	2389.1299	6.52	2	(34)	-58104.4	1	14183
	K.VYDYYETDEFAVAEYSAPCSK.D		2		836.3595	2506.0567	2506.0522	1.78	0	10	17089.5	1	14754
	K.IQEEGTEVELTGKGATEITTTITK.L		1		850.4520	2548.3341	2548.3120	8.68	1	33	56395.4	1	15040
	K.NEESLVFVQTDKPIYKPEQTVK.F		2		1296.6882	2591.3619	2591.3483	5.26	0	59	100828	1	15194
	K.NEESLVFVQTDKPIYKPEQTVK.F		4		648.8481	2591.3635	2591.3483	5.86	0	(48)	-82029.7	1	15197
	K.NEESLVFVQTDKPIYKPEQTVK.F		6		864.7952	2591.3637	2591.3483	5.95	0	(48)	-82029.7	1	15198
	R.IVLLDESFHPLNELVPLVYVEDPK.G		1		926.8451	2777.5134	2777.4891	8.76	0	(22)	-37596.9	1	15970
	R.IVLLDESFHPLNELVPLVYVEDPK.G		1		1389.7672	2777.5199	2777.4891	11.1	0	40	68358.1	1	15971
	R.IVLLDESFHPLNELVPLVYVEDPK.G		1		695.3884	2777.5244	2777.4891	12.7	0	(6)	-10253.7	1	15972
	R.AEMGRNRDFVHFDDTSEPPTETVR.K		1		562.0646	2805.2865	2805.2777	3.16	2	2	3417.9	1	16091
	R.AVDQSVLLMRPEAELSAATVYNLLPVK.D		1		976.5431	2926.6076	2926.5837	8.16	0	27	46141.7	1	16395
	R.IVLLDESFHPLNELVPLVYVEDPKGNR.I		1		1035.8975	3104.6706	3104.6546	5.13	1	47	80320.7	1	16666
	R.SGTHTLPVEQGDMQGHFSMSVPVESDIAPVAR.L		1		845.6611	3378.6152	3378.5973	5.29	0	(24)	-41014.8	1	17279
	R.SGTHTLPVEQGDMQGHFSMSVPVESDIAPVAR.L		2		1127.2129	3378.6168	3378.5973	5.78	0	(43)	-73484.9	1	17280
	R.SGTHTLPVEQGD->M<-QGHFSMSVPVESDIAPVAR.L		1	Oxidation (M)	1132.5427	3394.6063	3394.5922	4.16	0	47	80320.7	1	17316
	R.SGTHTLPVEQGDMQGHFS->M<-SVPVESDIAPVAR.L		2	Oxidation (M)	849.6599	3394.6103	3394.5922	5.32	0	(45)	-76902.8	1	17317
	R.SGTHTLPVEQGD->M<-QGHFSMSVPVESDIAPVAR.L		1	Oxidation (M)	849.6605	3394.6127	3394.5922	6.04	0	(33)	-56395.4	1	17318
	R.SGTHTLPVEQGDMQGHFS->M<-SVPVESDIAPVAR.L		2	Oxidation (M)	1132.5457	3394.6151	3394.5922	6.75	0	(16)	-27343.2	1	17320
	R.SGTHTLPVEQGD->M<-QGHFS->M<-SVPVESDIAPVAR.L		1	2 Oxidation (M)	853.6627	3410.6218	3410.5871	10.2	0	(18)	-30761.1	1	17352
	K.DLSSFPSSVNQQEEDNEDCISHDNVYINGIMYFPVSNTNEK.D		1		1184.7806	4735.0935	4735.0602	7.01	0	24	41014.8	1	19325
	K.DLSSFPSSVNQQEEDNEDCISHDNVYINGI->M<-YFPVSNTNEK.D		1	Oxidation (M)	1188.7793	4751.0881	4751.0552	6.93	0	(9)	-15380.6	1	19338
	Peptide	Unique	Matches	Modification	Observed	Mr(expt)	Mr(calc)	ppm	Miss	Score	#VALUE!	Rank	Query
	K.INVEVR.G		1		365.2182	728.4218	728.4181	5.18	0	57	97410.3	1	63
	K.ILQVER.E		2		379.2344	756.4543	756.4494	6.47	0	43	73484.9	1	146
	R.VFALDQK.M		2		410.7341	819.4537	819.4491	5.68	0	54	92283.4	1	466
	R.TRGQVGLAR.A		1		479.2856	956.5565	956.5516	5.22	1	26	44432.8	1	1216
	K.LNLKTESR.A		1		480.7792	959.5439	959.5400	4.13	1	42	71776	1	1243
	R->.<-QGSFQGGFR.S		2	Gln->pyro-Glu (N-term Q)	483.7279	965.4412	965.4356	5.83	0	19	32470.1	1	1269
	K.LELNVDSSK.A		2		502.7692	1003.5239	1003.5186	5.32	0	55	93992.4	1	1585
	K.AYRPGDTVK.L		1		503.7724	1005.5302	1005.5243	5.82	0	17	29052.2	1	1597
	K.AEFQGVLEK.L		2		510.7741	1019.5337	1019.5287	4.88	0	44	75193.9	1	1727
	K.VDFSLSSDR.D		2		513.2527	1024.4908	1024.4825	8.09	0	51	87156.6	1	1773
	K.SHKPLDMVK.V		2		352.1964	1053.5674	1053.5641	3.15	0	30	51268.6	1	2022
	K.SHKPLDMVK.V		1		527.7918	1053.5691	1053.5641	4.73	0	(27)	-46141.7	1	2024
	K.LGQYTSPVAK.R		2		532.2951	1062.5756	1062.5710	4.42	0	(57)	-97410.3	1	2103
	R.FGLLGEDGEK.T		4		532.7708	1063.5269	1063.5186	7.86	0	70	119627	1	2109
	K.YVLPNFEVK.I		4		554.8091	1107.6036	1107.5964	6.48	0	47	80320.7	1	2521
	R.LLLFSPSVVR.I		6		565.8542	1129.6939	1129.6859	7.10	0	58	99119.2	1	2784
	R.YRVFALDQK.M		3		570.3170	1138.6195	1138.6135	5.28	1	45	76902.8	1	2900
	R.YRVFALDQK.M		2		380.5473	1138.6201	1138.6135	5.79	1	(41)	-70067	1	2902
	K.TTGLCVATPAR.L		2		573.8038	1145.5931	1145.5863	5.94	0	57	97410.3	1	2972
	R.VAHNNLMAMAK.D		2		600.3090	1198.6034	1198.5950	6.94	0	49	83738.6	1	3624
	K.AAGLAFSDGDHR.T		3		406.1974	1215.5703	1215.5632	5.76	0	(46)	-78611.8	1	3873
	K.AAGLAFSDGDHR.T		2		608.7927	1215.5708	1215.5632	6.19	0	74	126462	1	3875
	K.KYVLPNFEVK.I		3		618.8565	1235.6985	1235.6914	5.73	1	49	83738.6	1	4070
	K.KYVLPNFEVK.I		2		412.9071	1235.6994	1235.6914	6.47	1	(25)	-42723.8	1	4071
	R.DMSGSPASGIPVK.V	U	2		623.3150	1244.6154	1244.6071	6.72	0	70	119627	1	4167
	R.D->M<-SGSPASGIPVK.V	U	6	Oxidation (M)	631.3118	1260.6091	1260.6020	5.63	0	(34)	-58104.4	1	4410
	K.LNISTDDLPGLR.Y		2		657.3611	1312.7076	1312.6987	6.81	0	64	109373	1	5091
	R.FVSSPFSLDLSK.T	U	4		663.8550	1325.6955	1325.6867	6.64	0	77	131589	1	5297
	R.SFFPENWLWK.V		2		677.3390	1352.6634	1352.6554	5.97	0	44	75193.9	1	5566
	K.VEEVDRFSQLR.L		2		689.3632	1376.7119	1376.7048	5.13	1	38	64940.2	1	5789
	K.VEEVDRFSQLR.L		2		459.9116	1376.7129	1376.7048	5.90	1	(27)	-46141.7	1	5791
	R.LEEELQFSLGSK.I		2		690.3619	1378.7092	1378.6980	8.14	0	73	124753	1	5819
	R.NPSHVNELCSPK.V		2		691.3320	1380.6495	1380.6456	2.84	0	65	111082	1	5829
	R.NPSHVNELCSPK.V		2		461.2240	1380.6503	1380.6456	3.39	0	(38)	-64940.2	1	5831
	K.LVDGQCQISLQK.A		5		694.8676	1387.7207	1387.7130	5.56	0	71	121336	1	5938
	K.AELADQAASWLTR.Q		1		477.9147	1430.7223	1430.7154	4.83	0	(30)	-51268.6	1	6462
	K.AELADQAASWLTR.Q		3		716.3696	1430.7246	1430.7154	6.45	0	93	158933	1	6464
	K.LQETATWLLSQQR.D		2		787.4255	1572.8365	1572.8260	6.70	0	69	117918	1	8053
	K.LQETATWLLSQQR.D		2		525.2862	1572.8367	1572.8260	6.84	0	(43)	-73484.9	1	8055
	K->.<-QTDMQGVNLLFSSR.R		2	Gln->pyro-Glu (N-term Q)	789.8887	1577.7629	1577.7508	7.67	0	(77)	-131589	1	8103
	R.FGLLGEDGEKTFLR.G		5		791.4211	1580.8276	1580.8199	4.90	1	94	160641	1	8128
	R.FGLLGEDGEKTFLR.G		7		527.9509	1580.8310	1580.8199	7.03	1	(76)	-129880	1	8136
	K.QTDMQGVNLLFSSR.R		4		798.4009	1594.7872	1594.7773	6.19	0	(80)	-136716	1	8319
	K.QTDMQGVNLLFSSR.R		3		532.6033	1594.7882	1594.7773	6.78	0	(46)	-78611.8	1	8321
	K.QTD->M<-QGVNLLFSSR.R		9	Oxidation (M)	806.3970	1610.7794	1610.7723	4.42	0	84	143552	1	8473
	R.YIYGKPVQGVAYVR.F		1		806.9511	1611.8875	1611.8773	6.36	0	43	73484.9	1	8491
	R.YIYGKPVQGVAYVR.F		1		538.3036	1611.8889	1611.8773	7.22	0	(18)	-30761.1	1	8492
	R.ALVALGAVDTALYAVGGK.S		1		844.9866	1687.9587	1687.9509	4.65	0	105	179440	1	9215
	R.ALVALGAVDTALYAVGGK.S		1		563.6604	1687.9594	1687.9509	5.04	0	(38)	-64940.2	1	9216
	K.AAGLAFSDGDHRTEIR.K		2		858.4322	1714.8498	1714.8387	6.50	1	(36)	-61522.3	1	9448
	K.AAGLAFSDGDHRTEIR.K		3		572.6240	1714.8502	1714.8387	6.73	1	42	71776	1	9449
	R.DFILLNVPIPQEQAR.V	U	1		584.9967	1751.9683	1751.9570	6.43	0	(31)	-52977.5	1	9683
	R.DFILLNVPIPQEQAR.V	U	1		876.9919	1751.9693	1751.9570	7.04	0	59	100828	1	9684
	K.AAGLAFSDGDHRTEIRK.S		1		922.4775	1842.9404	1842.9336	3.67	2	(7)	-11962.7	1	10264
	K.AAGLAFSDGDHRTEIRK.S		2		461.7429	1842.9423	1842.9336	4.72	2	(12)	-20507.4	1	10266
	K.AAGLAFSDGDHRTEIRK.S		4		615.3225	1842.9455	1842.9336	6.45	2	32	54686.5	1	10269
	R.SFFPENWLWKVEEVDR.F		2		694.3485	2080.0237	2080.0054	8.79	1	(28)	-47850.7	1	12160
	R.SFFPENWLWKVEEVDR.F		1		1041.0201	2080.0257	2080.0054	9.76	1	42	71776	1	12161
	R.VDVQAGGCEGKLELNVDSSK.A		2		702.3490	2104.0252	2104.0107	6.90	1	18	30761.1	1	12291
	R.LPQGCAEQT->M<-TLLAPTLAASR.Y		1	Oxidation (M)	749.0565	2244.1477	2244.1242	10.5	0	7	11962.7	1	13165
	R.AMELLQEEDLIEEDDIPVR.S		2		753.0402	2256.0987	2256.0831	6.89	0	(70)	-119627	1	13282
	R.AMELLQEEDLIEEDDIPVR.S		3		1129.0570	2256.0995	2256.0831	7.26	0	109	186276	1	13284
	R.A->M<-ELLQEEDLIEEDDIPVR.S		2	Oxidation (M)	758.3726	2272.0960	2272.0780	7.93	0	(47)	-80320.7	1	13407
	R.A->M<-ELLQEEDLIEEDDIPVR.S		7	Oxidation (M)	1137.0558	2272.0970	2272.0780	8.37	0	(102)	-174313	1	13409
	K.NRDFEQNTDGSGQVIVSIGVPR.T	U	3		796.7427	2387.2062	2387.1830	9.74	1	56	95701.3	1	14161
	K.VFEAMNSYDLGCGPGGGDTAPQVFK.A		2		873.0654	2616.1745	2616.1625	4.57	0	(90)	-153806	1	15332
	K.VFEAMNSYDLGCGPGGGDTAPQVFK.A		1		1309.0952	2616.1759	2616.1625	5.11	0	92	157224	1	15333
	K.VFEA->M<-NSYDLGCGPGGGDTAPQVFK.A		2	Oxidation (M)	878.4061	2632.1964	2632.1574	14.8	0	(74)	-126462	1	15427
	K.VDFSLSSDRDFILLNVPIPQEQAR.V	U	1		920.4870	2758.4392	2758.4290	3.69	1	43	73484.9	1	15935
F1MY85	Complement C5a anaphylatoxin OS=Bos taurus GN=C5 PE=4 SV=2	190751	3463	166(118)	62(48)	2.06	39%	F1MY85_uniprot		0.000870244	1.48721	-0.257	6.06
	Peptide	Unique	Matches	Modification	Observed	Mr(expt)	Mr(calc)	ppm	Miss	Score	#VALUE!	Rank	Query
	R.LNMDVK.V	U	1		360.1933	718.3720	718.3683	5.15	0	16	27343.2	1	31
	R.YFYNK.V	U	1		367.6812	733.3477	733.3435	5.78	0	12	20507.4	1	81
	K.GNPPIYR.F	U	1		408.7237	815.4328	815.4290	4.66	0	23	39305.9	1	449
	K.SNFIGYK.D	U	2		414.7187	827.4228	827.4177	6.15	0	59	100828	1	510
	K.IVHFGTR.D	U	3		415.2402	828.4659	828.4606	6.37	0	27	46141.7	1	518
	K.QYLIMGK.E	U	1		426.7391	851.4636	851.4575	7.16	0	23	39305.9	1	674
	R.VFQTLEK.G	U	1		432.7472	863.4798	863.4753	5.28	0	34	58104.4	1	703
	K.YVLSPYK.L	U	2		435.2450	868.4755	868.4694	6.99	0	36	61522.3	1	734
	K.YGVWTIR.A	U	4		447.7476	893.4806	893.4759	5.25	0	51	87156.6	1	864
	R.IVACASYK.L	U	1		456.2378	910.4611	910.4582	3.15	0	48	82029.7	1	964
	R.IPLNMVPK.T	U	2		456.2755	910.5364	910.5310	5.95	0	30	51268.6	1	970
	R.DAEITFIK.K	U	2		468.7583	935.5020	935.4964	6.05	0	40	68358.1	1	1094
	K.WLSEEQR.Y	U	2		474.2364	946.4582	946.4508	7.83	0	42	71776	1	1162
	R.IQAGPICIK.A	U	3		500.2893	998.5641	998.5583	5.86	0	33	56395.4	1	1542
	R.TSGIQFCVK.M	U	2		520.2685	1038.5224	1038.5168	5.39	0	34	58104.4	1	1876
	R.DAEITFIKK.T	U	2		532.8063	1063.5980	1063.5913	6.25	1	41	70067	1	2112
	K.CQLENGSFK.E	U	1		541.7531	1081.4917	1081.4862	5.02	0	33	56395.4	1	2223
	K.LQGTLPVEAR.E	U	2		542.3150	1082.6154	1082.6084	6.51	0	35	59813.3	1	2249
	K.NKGDLYHYK.M	U	1		379.8624	1136.5655	1136.5614	3.55	1	23	39305.9	1	2880
	K.NKGDLYHYK.M	U	1		569.2902	1136.5658	1136.5614	3.82	1	(15)	-25634.3	1	2882
	K.EGMVSIMSFR.N	U	1		578.7811	1155.5477	1155.5416	5.25	0	36	61522.3	1	3048
	R.DSFVPNTGTAR.M	U	2		582.7891	1163.5636	1163.5571	5.55	0	50	85447.6	1	3168
	K.EGMVSI->M<-SFR.N	U	1	Oxidation (M)	586.7706	1171.5267	1171.5366	-8.41	0	(1)	-1708.95	1	3311
	K.DMNYVNPVIK.W	U	2		596.8084	1191.6023	1191.5958	5.45	0	40	68358.1	1	3521
	K.SCCAIASQFR.A	U	1		600.2734	1198.5323	1198.5223	8.36	0	33	56395.4	1	3621
	K.YTATLLDIYK.A	U	3		600.8333	1199.6519	1199.6438	6.82	0	60	102537	1	3645
	R.FWKDDLQQR.D	U	2		618.3159	1234.6172	1234.6095	6.24	1	(35)	-59813.3	1	4056
	R.FWKDDLQQR.D	U	3		412.5464	1234.6173	1234.6095	6.31	1	50	85447.6	1	4057
	K.SLLPVTKPEIR.S	U	3		418.2608	1251.7605	1251.7551	4.34	0	(61)	-104246	1	4300
	K.SLLPVTKPEIR.S	U	3		626.8882	1251.7618	1251.7551	5.40	0	75	128171	1	4302
	K.DFTNFEITIR.A	U	2		628.3232	1254.6319	1254.6245	5.96	0	50	85447.6	1	4328
	R.NADYSYSMWK.G	U	2		632.7731	1263.5317	1263.5230	6.90	0	58	99119.2	1	4441
	R.AARIQAGPICIK.A	U	1		649.3717	1296.7288	1296.7336	-3.66	1	0	0	2	4847
	K.FQNSATLTIQPK.Q	U	4		674.3707	1346.7268	1346.7194	5.48	0	80	136716	1	5491
	K.ITHYNFLILSK.G	U	1		674.8880	1347.7614	1347.7551	4.75	0	1	1708.95	1	5504
	R.VYSLNDDLKPAK.R	U	2		681.8699	1361.7252	1361.7191	4.50	0	79	135007	1	5695
	R.VYSLNDDLKPAK.R	U	1		454.9160	1361.7261	1361.7191	5.20	0	(47)	-80320.7	1	5696
	K.QCTMFYSTSNTK.L	U	2		734.3195	1466.6244	1466.6170	5.02	0	47	80320.7	1	6910
	R.VYSLNDDLKPAKR.E	U	3		380.4648	1517.8300	1517.8202	6.49	1	(46)	-78611.8	1	7493
	R.VYSLNDDLKPAKR.E	U	3		759.9223	1517.8300	1517.8202	6.51	1	65	111082	1	7494
	R.VYSLNDDLKPAKR.E	U	3		506.9511	1517.8313	1517.8202	7.35	1	(47)	-80320.7	1	7498
	K.ISTSEEVCSFHLK.I	U	2		768.8763	1535.7381	1535.7290	5.95	0	100	170895	1	7632
	K.ISTSEEVCSFHLK.I	U	2		512.9207	1535.7403	1535.7290	7.39	0	(45)	-76902.8	1	7633
	K.VEIVAVTEENAFVK.Y	U	2		774.4266	1546.8386	1546.8243	9.26	0	19	32470.1	1	7779
	K.ELSYESLEDLNNK.Y	U	3		777.3757	1552.7369	1552.7256	7.26	0	67	114500	1	7843
	R.QSSVSHVYLEVTSK.H	U	1		521.9414	1562.8024	1562.7940	5.35	0	(17)	-29052.2	1	7944
	R.QSSVSHVYLEVTSK.H	U	3		782.4086	1562.8027	1562.7940	5.55	0	65	111082	1	7945
	K.TLDANQEITDLESK.K	U	3		788.8927	1575.7708	1575.7628	5.13	0	97	165768	1	8080
	K.VTYSSGHVTLSAENK.F	U	3		796.9038	1591.7931	1591.7842	5.57	0	89	152097	1	8256
	K.VTYSSGHVTLSAENK.F	U	2		531.6050	1591.7933	1591.7842	5.71	0	(66)	-112791	1	8258
	R.GEQVQLSGTVYNYR.T	U	3		807.4028	1612.7910	1612.7845	4.00	0	90	153806	1	8494
	K.VRVYSLNDDLKPAK.R	U	1		809.4548	1616.8951	1616.8886	4.04	1	0	0	1	8530
	R.DNLEDNQKEMMQK.A	U	2		811.8649	1621.7152	1621.7076	4.70	1	90	153806	1	8580
	R.DNLEDNQKEMMQK.A	U	2		541.5797	1621.7171	1621.7076	5.89	1	(31)	-52977.5	1	8582
	R.ENDEPCKEILRPK.R	U	2		543.2780	1626.8122	1626.8035	5.36	1	22	37596.9	1	8632
	K.EYVLPHFSISIEPK.S	U	1		829.9493	1657.8840	1657.8715	7.52	0	(13)	-22216.4	1	8948
	K.EYVLPHFSISIEPK.S	U	2		553.6357	1657.8852	1657.8715	8.25	0	22	37596.9	1	8949
	R.EIEAFGYSSSEYKR.I	U	3		833.3971	1664.7796	1664.7682	6.88	1	67	114500	1	9014
	R.EIEAFGYSSSEYKR.I	U	3		555.9340	1664.7802	1664.7682	7.24	1	(40)	-68358.1	1	9017
	K.AGEAAAERDAEITFIK.K	U	2		846.4405	1690.8664	1690.8526	8.20	1	30	51268.6	1	9227
	K.TLDANQEITDLESKK.S	U	3		852.9420	1703.8695	1703.8577	6.90	1	100	170895	1	9352
	K.TLDANQEITDLESKK.S	U	3		568.9640	1703.8701	1703.8577	7.29	1	(75)	-128171	1	9353
	K.DSFDHLVGGIPVTLSAK.T	U	3		585.9844	1754.9313	1754.9203	6.26	0	(37)	-63231.2	1	9696
	K.DSFDHLVGGIPVTLSAK.T	U	1		878.4730	1754.9314	1754.9203	6.30	0	48	82029.7	1	9697
	K.ALVEQVDQLLTDYEIK.D	U	1		626.3403	1875.9992	1875.9829	8.65	0	(49)	-83738.6	1	10560
	K.ALVEQVDQLLTDYEIK.D	U	1		939.0070	1875.9995	1875.9829	8.82	0	94	160641	1	10561
	K.TEDLDLPEENQASEDYR.A	U	1		675.2989	2022.8750	2022.8654	4.76	0	(75)	-128171	1	11770
	K.TEDLDLPEENQASEDYR.A	U	2		1012.4455	2022.8764	2022.8654	5.47	0	87	148679	1	11771
	R.ESYAGVTLDPQGVYGIISR.R	U	1		1013.0217	2024.0289	2024.0215	3.68	0	9	15380.6	1	11780
	K.MHPVEGICSSGTPVTDSQGR.R	U	2		705.6636	2113.9689	2113.9521	7.93	0	26	44432.8	1	12407
	K.CQLENGSFKENSDYQPVK.L	U	2		714.9993	2141.9760	2141.9688	3.37	1	19	32470.1	1	12608
	K.CQLENGSFKENSDYQPVK.L	U	1		1071.9985	2141.9825	2141.9688	6.43	1	(12)	-20507.4	1	12610
	K.ENSDYQPVKLQGTLPVEAR.E	U	1		715.3775	2143.1107	2143.0909	9.21	1	30	51268.6	1	12620
	R.FLANLDEFTEDIFLNGCENA.-	U	1		1166.5314	2331.0482	2331.0365	5.01	0	(1)	-1708.95	1	13869
	R.FLANLDEFTEDIFLNGCENA.-	U	1		778.0283	2331.0631	2331.0365	11.4	0	6	10253.7	1	13870
	K.CGNQLEVHLSPETDAYSPGQR.V	U	5		786.7016	2357.0830	2357.0706	5.24	0	94	160641	1	14012
	K.CGNQLEVHLSPETDAYSPGQR.V	U	1		1179.5547	2357.0948	2357.0706	10.3	0	(61)	-104246	1	14016
	K.LSDSAYQSINIPVTQDMVPSAR.L	U	2		1196.6018	2391.1891	2391.1740	6.30	0	(38)	-64940.2	1	14211
	K.LSDSAYQSINIPVTQDMVPSAR.L	U	2		798.0704	2391.1895	2391.1740	6.46	0	56	95701.3	1	14212
	R.DNAEVFYLAGLTFLTNANADDTR.E	U	1		1266.1146	2530.2147	2530.1976	6.76	0	115	196529	1	14919
	R.DKLSDSAYQSINIPVTQDMVPSAR.L	U	3		879.1100	2634.3081	2634.2959	4.64	1	57	97410.3	1	15451
	R.DKLSDSAYQSINIPVTQD->M<-VPSAR.L	U	2	Oxidation (M)	884.4457	2650.3152	2650.2908	9.20	1	(8)	-13671.6	1	15529
	R.ETVLTFIDPEGSEVDMVEENDYTGIISFPDFK.I	U	1		1212.9153	3635.7240	3635.6753	13.4	0	(18)	-30761.1	1	17906
	R.ETVLTFIDPEGSEVD->M<-VEENDYTGIISFPDFK.I	U	1	Oxidation (M)	1218.2430	3651.7073	3651.6702	10.2	0	56	95701.3	1	17937
	R.DNAEVFYLAGLTFLTNANADDTRENDEPCKEILRPK.R	U	1		828.8127	4139.0273	4138.9905	8.89	2	(5)	-8544.76	1	18676
	R.DNAEVFYLAGLTFLTNANADDTRENDEPCKEILRPK.R	U	1		1035.7664	4139.0363	4138.9905	11.1	2	17	29052.2	1	18677
P34955	Alpha-1-antiproteinase OS=Bos taurus GN=SERPINA1 PE=1 SV=1	46417	3148	191(115)	26(22)	10.08	42%	P34955_uniprot		0.00411487	7.03212	-0.056	6.05
	Peptide	Unique	Matches	Modification	Observed	Mr(expt)	Mr(calc)	ppm	Miss	Score	#VALUE!	Rank	Query
	K.IVELVK.V	U	6		350.7357	699.4568	699.4531	5.38	0	32	54686.5	1	6
	K.VPMMNR.L	U	2		374.1871	746.3596	746.3567	3.82	0	(28)	-47850.7	1	98
	K.SPLFVGK.V	U	5		374.2261	746.4377	746.4327	6.77	0	40	68358.1	1	110
	K.VP->M<-MNR.L	U	4	Oxidation (M)	382.1852	762.3559	762.3517	5.61	0	34	58104.4	1	175
	R.ADLSGITK.E	U	2		402.7292	803.4439	803.4389	6.24	0	40	68358.1	1	386
	K.AALTIDEK.G	U	2		430.7421	859.4696	859.4651	5.25	0	54	92283.4	1	682
	K.INDYVEK.G	U	2		440.7259	879.4372	879.4338	3.86	0	35	59813.3	1	798
	K.LNNELLAK.F	U	1		457.7717	913.5288	913.5232	6.07	0	53	90574.5	1	993
	K.KINDYVEK.G	U	1		504.7733	1007.5320	1007.5287	3.25	1	55	93992.4	1	1599
	K.GNTHTEILK.G	U	1		506.7763	1011.5381	1011.5349	3.19	0	25	42723.8	1	1638
	K.WEKPFEMK.H	U	2		365.5182	1093.5328	1093.5266	5.67	0	(13)	-22216.4	1	2370
	K.WEKPFEMK.H	U	3		547.7742	1093.5338	1093.5266	6.55	0	39	66649.1	1	2373
	K.KKINDYVEK.G	U	1		379.5494	1135.6262	1135.6237	2.23	2	(16)	-27343.2	1	2862
	K.KKINDYVEK.G	U	1		568.8213	1135.6280	1135.6237	3.82	2	43	73484.9	1	2863
	K.LSISETYDLK.S	U	57		584.8126	1167.6107	1167.6023	7.19	0	72	123045	1	3251
	K.LVDTFLEDVK.N	U	7		589.8221	1177.6296	1177.6231	5.56	0	64	109373	1	3372
	K.YASSANLHLPK.L	U	5		600.8254	1199.6363	1199.6298	5.41	0	72	123045	1	3636
	K.YASSANLHLPK.L	U	6		400.8864	1199.6374	1199.6298	6.31	0	(40)	-68358.1	1	3641
	K.GKWEKPFEMK.H	U	4		640.3333	1278.6519	1278.6431	6.96	1	48	82029.7	1	4632
	K.GKWEKPFEMK.H	U	2		427.2249	1278.6528	1278.6431	7.63	1	(45)	-76902.8	1	4633
	K.GKWEKPFE->M<-K.H	U	1	Oxidation (M)	648.3301	1294.6456	1294.6380	5.90	1	(21)	-35888	1	4825
	K.GKWEKPFE->M<-K.H	U	1	Oxidation (M)	432.5561	1294.6464	1294.6380	6.54	1	(1)	-1708.95	1	4826
	R.DFHVDEQTTVK.V	U	6		659.8208	1317.6270	1317.6201	5.26	0	51	87156.6	1	5180
	R.DFHVDEQTTVK.V	U	4		440.2167	1317.6282	1317.6201	6.12	0	(41)	-70067	1	5185
	K.KYASSANLHLPK.L	U	3		664.8724	1327.7302	1327.7248	4.08	1	(39)	-66649.1	1	5315
	K.KYASSANLHLPK.L	U	1		443.5846	1327.7319	1327.7248	5.32	1	70	119627	1	5318
	K.INDYVEKGSHGK.I	U	2		449.5641	1345.6705	1345.6626	5.88	1	(47)	-80320.7	1	5479
	K.INDYVEKGSHGK.I	U	2		673.8441	1345.6736	1345.6626	8.14	1	51	87156.6	1	5480
	R.LGMFDLHYCDK.L	U	3		699.8160	1397.6175	1397.6108	4.82	0	60	102537	1	6059
	R.LGMFDLHYCDK.L	U	2		466.8809	1397.6208	1397.6108	7.19	0	(41)	-70067	1	6062
	R.ADLSGITKEQPLK.V	U	1		700.3993	1398.7840	1398.7718	8.73	1	9	15380.6	1	6090
	R.LG->M<-FDLHYCDK.L	U	1	Oxidation (M)	472.2123	1413.6152	1413.6057	6.71	0	(27)	-46141.7	1	6238
	K.SVLGDVGITEVFSDR.A	U	3		531.9447	1592.8123	1592.8046	4.80	0	(59)	-100828	1	8281
	K.SVLGDVGITEVFSDR.A	U	28		797.4141	1592.8137	1592.8046	5.69	0	102	174313	1	8284
	K.NLYHSEAFSINFR.D	U	2		533.2676	1596.7809	1596.7685	7.80	0	12	20507.4	1	8360
	K.LQQLEDKLNNELLAK.F	U	3		884.9993	1767.9841	1767.9730	6.28	1	92	157224	1	9784
	K.LQQLEDKLNNELLAK.F	U	3		590.3356	1767.9851	1767.9730	6.82	1	(62)	-105955	1	9787
	K.HTTERDFHVDEQTTVK.V	U	1		486.4882	1941.9237	1941.9181	2.87	1	(10)	-17089.5	1	11141
	K.HTTERDFHVDEQTTVK.V	U	2		648.3171	1941.9296	1941.9181	5.92	1	19	32470.1	1	11142
	R.DFHVDEQTTVKVPMMNR.L	U	3		1023.9942	2045.9738	2045.9663	3.69	1	68	116209	1	11954
	R.DFHVDEQTTVKVPMMNR.L	U	2		682.9995	2045.9765	2045.9663	5.00	1	(39)	-66649.1	1	11956
	R.DFHVDEQTTVKVPMMNR.L	U	1		512.5023	2045.9802	2045.9663	6.79	1	(28)	-47850.7	1	11958
	K.SVLGDVGITEVFSDRADLSGITK.E	U	2		793.7584	2378.2533	2378.2329	8.54	1	42	71776	1	14118
Q5EA67	Inter-alpha (Globulin) inhibitor H4 (Plasma Kallikrein-sensitive glycoprotein) OS=Bos taurus GN=ITIH4 PE=2 SV=1	101617	2546	156(99)	32(29)	2.79	33%	Q5EA67_uniprot		0.00153518	2.62354	-0.238	6.25
	Peptide	Unique	Matches	Modification	Observed	Mr(expt)	Mr(calc)	ppm	Miss	Score	#VALUE!	Rank	Query
	R.LCVDLR.R		3		388.2122	774.4098	774.4058	5.11	0	57	97410.3	1	215
	R.VYLGPMR.F		4		418.2309	834.4472	834.4422	6.07	0	(38)	-64940.2	1	539
	R.VYLGP->M<-R.F		10	Oxidation (M)	426.2281	850.4417	850.4371	5.39	0	46	78611.8	1	659
	K.GSELVVAGK.L		1		430.2488	858.4831	858.4811	2.32	0	58	99119.2	1	681
	R.FGHSVGDR.T		2		437.7145	873.4143	873.4093	5.74	0	35	59813.3	1	770
	K.NVIFVIDK.S		4		474.2839	946.5533	946.5488	4.82	0	24	41014.8	1	1167
	K.VRPQQLVK.H		2		484.3077	966.6009	966.5974	3.61	0	33	56395.4	1	1290
	R.LLLQNTDR.F		3		486.7799	971.5453	971.5400	5.51	0	60	102537	1	1310
	K.MALENGGLAR.R		2		516.2724	1030.5302	1030.5229	7.10	0	57	97410.3	1	1829
	R.FAHTVITSR.V		2		516.2880	1030.5614	1030.5560	5.22	0	37	63231.2	1	1834
	K.->M<-ALENGGLAR.R		2	Oxidation (M)	524.2676	1046.5207	1046.5179	2.75	0	(44)	-75193.9	1	1932
	K.EISCWSVEL.-		2		561.7648	1121.5150	1121.5063	7.74	0	2	3417.9	2	2682
	K.LDYQESPPGK.E		2		567.2803	1132.5460	1132.5400	5.25	0	55	93992.4	1	2825
	R.HLGAYELLLK.V		4		578.8424	1155.6701	1155.6652	4.32	0	50	85447.6	1	3054
	R.HLGAYELLLK.V		2		386.2310	1155.6711	1155.6652	5.10	0	(41)	-70067	1	3055
	R.EATFQMELPK.K		4		597.2994	1192.5842	1192.5798	3.71	0	62	105955	1	3532
	R.FKPTLSQQQK.Y		2		402.2291	1203.6654	1203.6612	3.48	0	(18)	-30761.1	1	3710
	R.FKPTLSQQQK.Y		2		602.8407	1203.6668	1203.6612	4.72	0	42	71776	1	3713
	R.EATFQ->M<-ELPK.K		4	Oxidation (M)	605.2984	1208.5822	1208.5747	6.24	0	(42)	-71776	1	3763
	K.YIFHSFIER.L		3		404.5482	1210.6228	1210.6135	7.73	0	(36)	-61522.3	1	3800
	K.YIFHSFIER.L		3		606.3189	1210.6231	1210.6135	7.99	0	41	70067	1	3802
	K.ETLYSVMPGLK.V		4		619.3326	1236.6506	1236.6424	6.64	0	42	71776	1	4083
	K.ETLYSV->M<-PGLK.V		1	Oxidation (M)	627.3293	1252.6440	1252.6373	5.34	0	(24)	-41014.8	1	4308
	K.EGLLLLSRPDR.V		2		423.5847	1267.7322	1267.7248	5.86	0	30	51268.6	1	4492
	K.EGLLLLSRPDR.V		3		634.8737	1267.7329	1267.7248	6.37	0	(30)	-51268.6	1	4493
	R.EATFQMELPKK.A		3		661.3485	1320.6825	1320.6747	5.85	1	52	88865.5	1	5235
	R.EATFQMELPKK.A		2		441.2349	1320.6828	1320.6747	6.13	1	(31)	-52977.5	1	5236
	K.AAAQEQYSAAVAR.G		3		668.3383	1334.6621	1334.6578	3.19	0	79	135007	1	5341
	K.QDTVLDGSFIVR.Y	U	5		675.3603	1348.7060	1348.6987	5.43	0	70	119627	1	5523
	R.EQSPDVLLAQIR.G		1		456.9231	1367.7474	1367.7409	4.77	0	35	59813.3	1	5735
	R.VTIGLLFWDGPGK.G		2		701.8972	1401.7799	1401.7657	10.2	0	74	126462	1	6129
	R.ELKLDYQESPPGK.E		3		752.3932	1502.7718	1502.7616	6.78	1	68	116209	1	7387
	R.ELKLDYQESPPGK.E		2		501.9312	1502.7719	1502.7616	6.82	1	(18)	-30761.1	1	7388
	K.VTFELVYEELLAR.H		13		791.4376	1580.8606	1580.8450	9.86	0	73	124753	1	8148
	K.VTFELVYEELLAR.H		2		527.9617	1580.8632	1580.8450	11.5	0	(70)	-119627	1	8155
	K.EKAAAQEQYSAAVAR.G		1		796.9082	1591.8018	1591.7954	4.06	1	49	83738.6	1	8261
	K.LREQSPDVLLAQIR.G		4		819.4747	1636.9348	1636.9260	5.35	1	97	165768	1	8750
	K.LREQSPDVLLAQIR.G		3		546.6534	1636.9385	1636.9260	7.62	1	(58)	-99119.2	1	8753
	K.VQNDIDIYSLTVDSK.V		2		855.4373	1708.8600	1708.8519	4.70	0	79	135007	1	9396
	K.VTMDKEGLLLLSRPDR.V		3		615.0113	1842.0120	1842.0033	4.75	1	25	42723.8	1	10255
	K.VTMDKEGLLLLSRPDR.V		1		922.0133	1842.0121	1842.0033	4.76	1	(17)	-29052.2	1	10256
	K.VTMDKEGLLLLSRPDR.V		2		461.5106	1842.0134	1842.0033	5.47	1	(22)	-37596.9	1	10257
	K.VT->M<-DKEGLLLLSRPDR.V		2	Oxidation (M)	465.5094	1858.0086	1857.9982	5.60	1	(21)	-35888	1	10396
	K.VT->M<-DKEGLLLLSRPDR.V		6	Oxidation (M)	620.3441	1858.0104	1857.9982	6.53	1	(19)	-32470.1	1	10399
	K.YPEKQDTVLDGSFIVR.Y	U	6		933.9892	1865.9638	1865.9523	6.17	1	88	150388	1	10470
	K.YPEKQDTVLDGSFIVR.Y	U	7		622.9955	1865.9646	1865.9523	6.58	1	(80)	-136716	1	10473
	R.ELKLDYQESPPGKEISCWSVEL.-		2		869.7656	2606.2751	2606.2574	6.78	2	20	34179	1	15269
	R.RPQELVNLLSDPDQGVEVTGHFETAK.A		4		720.6225	2878.4609	2878.4461	5.14	0	(66)	-112791	1	16251
	R.RPQELVNLLSDPDQGVEVTGHFETAK.A		3		960.4950	2878.4632	2878.4461	5.93	0	98	167477	1	16253
	K.ANQEELLPEGSITLIILLTDGDPTVGETNPSNIQK.N	U	1		930.7471	3718.9592	3718.9153	11.8	0	18	30761.1	1	18053
V6F9A2	Apolipoprotein A-I preproprotein OS=Bos taurus GN=APOA1 PE=4 SV=1	30258	2512	141(103)	38(32)	223.77	82%	V6F9A2_uniprot		0.00465992	7.96359	-0.619	5.71
P15497	Apolipoprotein A-I OS=Bos taurus GN=APOA1 PE=1 SV=3	30258	2512	141(103)	38(32)		82%	P15497_uniprot			0
	Peptide	Unique	Matches	Modification	Observed	Mr(expt)	Mr(calc)	ppm	Miss	Score	#VALUE!	Rank	Query
	R.AHVETLR.Q	U	1		413.2350	824.4555	824.4504	6.12	0	20	34179	1	493
	K.VAPLGEEFR.E	U	4		509.2750	1016.5354	1016.5291	6.24	0	47	80320.7	1	1688
	K.LSPLAQELR.D	U	3		513.8035	1025.5925	1025.5869	5.45	0	58	99119.2	1	1786
	K.AKPVLEDLR.Q	U	2		520.8119	1039.6092	1039.6026	6.40	0	40	68358.1	1	1883
	R.ARAHVETLR.Q	U	2		351.5388	1051.5945	1051.5887	5.60	1	32	54686.5	1	1993
	R->.<-QKVQELQDK.L	U	1	Gln->pyro-Glu (N-term Q)	549.7953	1097.5760	1097.5717	3.96	1	42	71776	1	2416
	K.ASEQLKALGEK.A	U	1		587.3326	1172.6506	1172.6401	9.00	1	12	20507.4	1	3320
	R->.<-QGLLPVLESLK.V	U	1	Gln->pyro-Glu (N-term Q)	590.3600	1178.7054	1178.6911	12.2	0	(13)	-22216.4	1	3395
	R.QGLLPVLESLK.V	U	2		598.8694	1195.7242	1195.7176	5.52	0	58	99119.2	1	3599
	K.VSILAAIDEASK.K	U	2		608.8470	1215.6794	1215.6710	6.89	0	75	128171	1	3877
	K.EGGGSLAEYHAK.A	U	1		609.7929	1217.5713	1217.5676	2.98	0	68	116209	1	3886
	K.EGGGSLAEYHAK.A	U	1		406.8645	1217.5718	1217.5676	3.38	0	(36)	-61522.3	1	3887
	K.DFATVYVEAIK.D	U	2		628.3354	1254.6562	1254.6496	5.29	0	55	93992.4	1	4330
	K.WHEEVEIYR.Q	U	10		420.8739	1259.5999	1259.5935	5.09	0	(39)	-66649.1	1	4376
	K.WHEEVEIYR.Q	U	12		630.8081	1259.6017	1259.5935	6.52	0	44	75193.9	1	4383
	K.VQPYLDEFQK.K	U	3		633.8264	1265.6383	1265.6292	7.18	0	33	56395.4	1	4468
	R.QKVAPLGEEFR.E	U	1		637.3525	1272.6904	1272.6826	6.12	1	(63)	-107664	1	4557
	R.QKVAPLGEEFR.E	U	1		425.2375	1272.6906	1272.6826	6.23	1	67	114500	1	4558
	R->.<-QQLAPYSDDLR.Q	U	3	Gln->pyro-Glu (N-term Q)	644.8162	1287.6179	1287.6095	6.49	0	(35)	-59813.3	1	4739
	K.LSPLAQELRDR.A	U	2		649.3685	1296.7224	1296.7150	5.72	1	(15)	-25634.3	1	4844
	K.LSPLAQELRDR.A	U	2		433.2484	1296.7234	1296.7150	6.51	1	20	34179	1	4846
	R.QQLAPYSDDLR.Q	U	5		653.3306	1304.6466	1304.6361	8.07	0	64	109373	1	4979
	K.VSILAAIDEASKK.L	U	3		448.9316	1343.7731	1343.7660	5.28	1	(60)	-102537	1	5419
	K.VSILAAIDEASKK.L	U	3		672.8940	1343.7735	1343.7660	5.61	1	93	158933	1	5421
	R.QEMHKDLEEVK.Q	U	1		462.5641	1384.6706	1384.6656	3.60	1	(10)	-17089.5	1	5900
	R.QEMHKDLEEVK.Q	U	1		693.3438	1384.6729	1384.6656	5.28	1	41	70067	1	5901
	K.KWHEEVEIYR.Q	U	1		694.8600	1387.7054	1387.6884	12.3	1	12	20507.4	1	5935
	K.VQPYLDEFQKK.W	U	3		465.5840	1393.7303	1393.7242	4.43	1	(32)	-54686.5	1	6013
	K.VQPYLDEFQKK.W	U	3		697.8728	1393.7310	1393.7242	4.95	1	43	73484.9	1	6016
	R.DYVAQFEASALGK.Q	U	5		699.8526	1397.6906	1397.6827	5.70	0	71	121336	1	6071
	K.VAPLGEEFREGAR.Q	U	2		715.8769	1429.7393	1429.7314	5.59	1	47	80320.7	1	6448
	K.VAPLGEEFREGAR.Q	U	2		477.5880	1429.7421	1429.7314	7.52	1	(28)	-47850.7	1	6450
	R.VKDFATVYVEAIK.D	U	2		741.9186	1481.8226	1481.8130	6.50	1	60	102537	1	7167
	R.VKDFATVYVEAIK.D	U	3		494.9483	1481.8231	1481.8130	6.82	1	(37)	-63231.2	1	7168
	R->.<-QQLAPYSDDLRQR.L	U	1	Gln->pyro-Glu (N-term Q)	786.8972	1571.7798	1571.7692	6.72	1	(19)	-32470.1	1	8035
	K.LLDNWDTLASTLSK.V	U	1		526.2823	1575.8252	1575.8144	6.85	0	(57)	-97410.3	1	8095
	K.LLDNWDTLASTLSK.V	U	2		788.9214	1575.8282	1575.8144	8.76	0	105	179440	1	8097
	R.QQLAPYSDDLRQR.L	U	2		530.6085	1588.8037	1588.7957	5.03	1	36	61522.3	1	8221
	R.QQLAPYSDDLRQR.L	U	2		795.4097	1588.8049	1588.7957	5.77	1	(29)	-49559.6	1	8223
	R.QEMHKDLEEVKQK.V	U	1		411.2137	1640.8256	1640.8192	3.93	2	7	11962.7	1	8804
	R->.<-QKVAPLGEEFREGAR.Q	U	1	Gln->pyro-Glu (N-term Q)	557.2974	1668.8703	1668.8584	7.13	2	(20)	-34179	1	9058
	K.DFATVYVEAIKDSGR.D	U	2		557.6199	1669.8378	1669.8311	3.97	1	(57)	-97410.3	1	9067
	K.DFATVYVEAIKDSGR.D	U	3		835.9292	1669.8438	1669.8311	7.61	1	78	133298	1	9070
	R.QKVAPLGEEFREGAR.Q	U	1		422.4814	1685.8965	1685.8849	6.91	2	(8)	-13671.6	1	9205
	R.QKVAPLGEEFREGAR.Q	U	2		562.9730	1685.8972	1685.8849	7.32	2	31	52977.5	1	9206
	R.LEALKEGGGSLAEYHAK.A	U	2		886.9675	1771.9205	1771.9104	5.70	1	53	90574.5	1	9803
	R.LEALKEGGGSLAEYHAK.A	U	1		443.9877	1771.9218	1771.9104	6.43	1	(39)	-66649.1	1	9805
	K.DSGRDYVAQFEASALGK.Q	U	2		605.2988	1812.8747	1812.8642	5.76	1	(57)	-97410.3	1	10096
	K.DSGRDYVAQFEASALGK.Q	U	2		907.4447	1812.8748	1812.8642	5.86	1	91	155515	1	10098
	K.VQELQDKLSPLAQELR.D	U	2		623.0189	1866.0348	1866.0210	7.35	1	(57)	-97410.3	1	10476
	K.VQELQDKLSPLAQELR.D	U	2		934.0267	1866.0389	1866.0210	9.57	1	94	160641	1	10478
	R.VKDFATVYVEAIKDSGR.D	U	2		475.2590	1897.0069	1896.9945	6.52	2	(26)	-44432.8	1	10736
	R.VKDFATVYVEAIKDSGR.D	U	2		633.3432	1897.0078	1896.9945	6.98	2	73	124753	1	10737
	R.VKDFATVYVEAIKDSGR.D	U	1		949.5113	1897.0080	1896.9945	7.12	2	(49)	-83738.6	1	10739
	R.EQLGPVTQEFWDNLEK.E	U	1		644.9854	1931.9342	1931.9265	4.00	0	(27)	-46141.7	1	11057
	R.EQLGPVTQEFWDNLEK.E	U	1		966.9748	1931.9351	1931.9265	4.48	0	79	135007	1	11059
	K.ETASLRQEMHKDLEEVK.Q	U	1		681.6809	2042.0209	2042.0102	5.24	2	4	6835.81	1	11941
	R->.<-QKVQELQDKLSPLAQELR.D	U	2	Gln->pyro-Glu (N-term Q)	702.7267	2105.1582	2105.1480	4.83	2	(34)	-58104.4	1	12309
	R.QKVQELQDKLSPLAQELR.D	U	1		708.4021	2122.1845	2122.1746	4.66	2	58	99119.2	1	12467
	R.QKVQELQDKLSPLAQELR.D	U	2		531.5536	2122.1853	2122.1746	5.03	2	(44)	-75193.9	1	12468
	K.VQELQDKLSPLAQELRDR.A	U	3		713.3944	2137.1612	2137.1491	5.67	2	31	52977.5	1	12583
	K.VREQLGPVTQEFWDNLEK.E	U	1		1094.5623	2187.1100	2187.0960	6.38	1	58	99119.2	1	12827
	K.VREQLGPVTQEFWDNLEK.E	U	3		730.0440	2187.1102	2187.0960	6.48	1	(56)	-95701.3	1	12828
	R.EQLGPVTQEFWDNLEKETASLR.Q	U	1		864.1086	2589.3039	2589.2711	12.7	1	27	46141.7	1	15185
F1MJK3	Uncharacterized protein OS=Bos taurus GN=LOC506828 PE=4 SV=2	166989	2471	170(112)	49(45)		30%	F1MJK3_uniprot			0
	Peptide	Unique	Matches	Modification	Observed	Mr(expt)	Mr(calc)	ppm	Miss	Score	#VALUE!	Rank	Query
	R.YNILPK.K		5		374.2260	746.4375	746.4326	6.46	0	42	71776	1	109
	K.FEVQVK.M	U	3		375.2150	748.4154	748.4119	4.68	0	28	47850.7	1	120
	R.GEAFTLK.A		4		383.2127	764.4108	764.4068	5.18	0	39	66649.1	1	184
	K.VHSHYR.R	U	1		399.7056	797.3966	797.3933	4.17	0	3	5126.86	1	351
	K.KPIYITK.A	U	2		431.7752	861.5359	861.5324	4.07	0	29	49559.6	1	692
	K.YGAATFIK.G	U	3		435.7428	869.4710	869.4647	7.31	0	40	68358.1	1	742
	K.IFSMGYR.G	U	3		437.2209	872.4272	872.4214	6.63	0	41	70067	1	764
	K.VKETIRK.Y	U	1		437.2805	872.5464	872.5443	2.41	2	19	32470.1	1	769
	K.NLKPATIK.A	U	1		442.7834	883.5522	883.5491	3.50	0	40	68358.1	1	856
	K.MVSGFIPVK.S	U	4		489.2815	976.5484	976.5416	6.95	0	54	92283.4	1	1348
	K.VVLLKEPGK.R	U	1		491.8216	981.6287	981.6223	6.56	1	25	42723.8	1	1393
	R.TVSWAVTPK.S	U	4		494.7799	987.5453	987.5389	6.41	0	31	52977.5	1	1444
	K.KKPIYITK.A	U	1		495.8228	989.6311	989.6273	3.79	1	37	63231.2	1	1466
	K.->M<-VSGFIPVK.S	U	10	Oxidation (M)	497.2772	992.5398	992.5365	3.35	0	(23)	-39305.9	1	1488
	R.NLLTDLEAK.N	U	4		508.7872	1015.5599	1015.5549	4.89	0	52	88865.5	1	1674
	R.SGSLLNNAIK.G	U	2		508.7932	1015.5717	1015.5662	5.49	0	44	75193.9	1	1679
	R.NALFCLER.A	U	3		511.7607	1021.5069	1021.5015	5.27	0	43	73484.9	1	1740
	R.GLVTINVCR.K	U	2		516.2894	1030.5643	1030.5594	4.80	0	32	54686.5	1	1836
	R.IFQWPSFK.L	U	5		526.7849	1051.5553	1051.5491	5.86	0	51	87156.6	1	1986
	R.NELLESLHK.E	U	2		361.5346	1081.5820	1081.5767	4.87	0	(21)	-35888	1	2227
	R.NELLESLHK.E	U	2		541.7983	1081.5821	1081.5767	4.99	0	33	56395.4	1	2228
	K.VPDTITEWK.A	U	3		544.7880	1087.5615	1087.5550	5.99	0	49	83738.6	1	2307
	K.LQEMAQIQR.T	U	2		558.7985	1115.5825	1115.5757	6.09	0	55	93992.4	1	2601
	K.LPSNVVEGSAR.A	U	3		564.8071	1127.5997	1127.5935	5.53	0	63	107664	1	2757
	K.VVLLKEPGKR.I	U	1		380.2503	1137.7291	1137.7234	5.05	2	25	42723.8	1	2895
	K.VPHFPEIGQK.D	U	2		576.3157	1150.6168	1150.6135	2.86	0	(16)	-27343.2	1	3003
	K.VPHFPEIGQK.D	U	6		384.5475	1150.6205	1150.6135	6.11	0	24	41014.8	1	3008
	K.YGAATFIKGEK.A	U	1		592.8231	1183.6317	1183.6237	6.75	1	59	100828	1	3452
	K.YGAATFIKGEK.A	U	2		395.5513	1183.6321	1183.6237	7.07	1	(56)	-95701.3	1	3453
	K.RNELLESLHK.E	U	3		619.8491	1237.6837	1237.6778	4.72	1	37	63231.2	1	4095
	K.RNELLESLHK.E	U	3		413.5689	1237.6849	1237.6778	5.71	1	(28)	-47850.7	1	4098
	R.KLQEMAQIQR.T	U	2		622.8473	1243.6800	1243.6707	7.54	1	66	112791	1	4160
	R.KLQEMAQIQR.T	U	2		415.5673	1243.6800	1243.6707	7.55	1	(36)	-61522.3	1	4161
	R.KLQE->M<-AQIQR.T	U	1	Oxidation (M)	630.8412	1259.6679	1259.6656	1.89	1	(56)	-95701.3	1	4405
	R.KLQE->M<-AQIQR.T	U	1	Oxidation (M)	420.8996	1259.6770	1259.6656	9.05	1	(30)	-51268.6	1	4406
	K.ITAAPYSLCGLR.A	U	3		661.3528	1320.6910	1320.6860	3.80	0	76	129880	1	5239
	K.HSDGSYSTFGDR.D	U	1		664.7809	1327.5473	1327.5429	3.32	0	51	87156.6	1	5310
	R.SQGNTWLTAFVLK.S	U	1		732.8994	1463.7841	1463.7773	4.70	0	67	114500	1	6882
	R.LLLQEVALPEIPGK.Y	U	3		507.3080	1518.9021	1518.9021	0.01	0	(47)	-80320.7	1	7502
	R.LLLQEVALPEIPGK.Y	U	4		760.4617	1518.9088	1518.9021	4.40	0	86	146970	1	7504
	K.ALLAYAFALAGDQAK.R	U	1		761.9202	1521.8259	1521.8191	4.48	0	53	90574.5	1	7530
	R.GLPFFGQVLLVNEK.D	U	1		780.9501	1559.8857	1559.8712	9.32	0	44	75193.9	1	7914
	K.LSLKLPSNVVEGSAR.A	U	1		523.9734	1568.8983	1568.8886	6.22	1	34	58104.4	1	8019
	R.KPQEVNELYSPHR.A	U	2		532.9450	1595.8132	1595.8056	4.78	0	(51)	-87156.6	1	8341
	R.KPQEVNELYSPHR.A	U	3		798.9145	1595.8144	1595.8056	5.55	0	110	187985	1	8342
	K.HSDGSYSTFGDRDGR.S	U	1		828.8563	1655.6980	1655.6924	3.34	1	(24)	-41014.8	1	8917
	K.HSDGSYSTFGDRDGR.S	U	3		552.9072	1655.6997	1655.6924	4.37	1	31	52977.5	1	8920
	R.VHYILNGQILTDER.E	U	1		835.9524	1669.8902	1669.8788	6.87	0	25	42723.8	1	9077
	K.RLLLQEVALPEIPGK.Y	U	2		559.3436	1675.0091	1675.0032	3.50	1	43	73484.9	1	9126
	R.IEHSFEVDEYVLPK.F	U	3		852.9329	1703.8512	1703.8406	6.18	0	(48)	-82029.7	1	9341
	R.IEHSFEVDEYVLPK.F	U	4		568.9579	1703.8520	1703.8406	6.68	0	54	92283.4	1	9342
	R.AWQSASEAQGSFVYTK.A	U	2		880.4218	1758.8291	1758.8213	4.41	0	77	131589	1	9727
	K.SYIQLEPVADTVICGK.T	U	2		896.9670	1791.9195	1791.9077	6.61	0	77	131589	1	9921
	K.SAGTFSEEFQVDEAKR.L	U	4		900.9273	1799.8401	1799.8326	4.15	1	102	174313	1	9987
	K.SAGTFSEEFQVDEAKR.L	U	5		600.9542	1799.8408	1799.8326	4.58	1	(85)	-145261	1	9990
	K.RIEHSFEVDEYVLPK.F	U	2		930.9822	1859.9498	1859.9417	4.34	1	56	95701.3	1	10408
	K.RIEHSFEVDEYVLPK.F	U	3		620.9921	1859.9544	1859.9417	6.80	1	(49)	-83738.6	1	10410
	K.RIEHSFEVDEYVLPK.F	U	2		465.9964	1859.9564	1859.9417	7.87	1	(35)	-59813.3	1	10413
	K.EAVKEEDSIHWQRPR.K	U	2		470.7428	1878.9422	1878.9336	4.57	1	30	51268.6	1	10576
	K.EAVKEEDSIHWQRPR.K	U	1		627.3214	1878.9422	1878.9336	4.58	1	(23)	-39305.9	1	10577
	K.CINAEDITHNGIIYIPK.Q	U	2		657.6763	1970.0070	1969.9931	7.04	0	(20)	-34179	1	11354
	K.CINAEDITHNGIIYIPK.Q	U	1		986.0108	1970.0070	1969.9931	7.07	0	45	76902.8	1	11355
	R.SQELCGNKVPHFPEIGQK.D	U	3		690.0181	2067.0324	2067.0208	5.63	1	39	66649.1	1	12077
	R.EEGTGLELTGHGSSEITNTLSK.L	U	1		754.0414	2259.1025	2259.0866	7.02	0	30	51268.6	1	13304
	K.QQNPNGGFSSTQDTVVALQALSK.Y	U	3		797.4078	2389.2017	2389.1874	5.99	0	74	126462	1	14188
	K.QQNPNGGFSSTQDTVVALQALSK.Y	U	1		1195.6106	2389.2066	2389.1874	8.07	0	(26)	-44432.8	1	14189
	K.VREEGTGLELTGHGSSEITNTLSK.L	U	4		629.5754	2514.2724	2514.2562	6.46	1	61	104246	1	14798
	K.VREEGTGLELTGHGSSEITNTLSK.L	U	3		839.0984	2514.2733	2514.2562	6.83	1	(55)	-93992.4	1	14800
P01030	Complement C4 (Fragments) OS=Bos taurus GN=C4 PE=1 SV=2	103018	1708	107(71)	37(29)	2.72	46%	P01030_uniprot		0.00103865	1.77501	-0.318	6.15
	Peptide	Unique	Matches	Modification	Observed	Mr(expt)	Mr(calc)	ppm	Miss	Score	#VALUE!	Rank	Query
	K.INVEVR.G		1		365.2182	728.4218	728.4181	5.18	0	57	97410.3	1	63
	K.ILQVER.E		2		379.2344	756.4543	756.4494	6.47	0	43	73484.9	1	146
	R.AVDLIQK.G		2		393.7419	785.4693	785.4647	5.83	0	41	70067	1	244
	R.ANTFLGAK.A		2		411.2319	820.4492	820.4443	6.04	0	54	92283.4	1	469
	K.FACYSPR.V		2		450.7077	899.4008	899.3960	5.36	0	39	66649.1	1	895
	R.VDYGFQVK.V		3		478.2509	954.4871	954.4811	6.34	0	36	61522.3	1	1201
	R.TRGQVGLAR.V		1		479.2856	956.5565	956.5516	5.22	1	26	44432.8	1	1216
	R->.<-QGSFQGGFR.S		2	Gln->pyro-Glu (N-term Q)	483.7279	965.4412	965.4356	5.83	0	19	32470.1	1	1269
	K.CSVFYGAPR.K		5		528.7539	1055.4931	1055.4859	6.91	0	50	85447.6	1	2043
	K.DRAVDLIQK.G		1		529.3057	1056.5968	1056.5927	3.81	1	12	20507.4	1	2055
	K.LGQYTSPVAK.R		2		532.2951	1062.5756	1062.5710	4.42	0	(57)	-97410.3	1	2103
	R.GQQDLEGYR.M		2		533.2512	1064.4878	1064.4887	-0.85	0	50	85447.6	1	2118
	R.ITQVLHFTK.D		3		543.8218	1085.6291	1085.6233	5.33	0	45	76902.8	1	2281
	R.ITQVLHFTK.D		3		362.8837	1085.6294	1085.6233	5.55	0	(30)	-51268.6	1	2282
	R.DGSYGAWLHR.D		2		581.2790	1160.5435	1160.5363	6.24	0	66	112791	1	3126
	R.DGSYGAWLHR.D		2		387.8554	1160.5444	1160.5363	6.98	0	(29)	-49559.6	1	3127
	R.VAHNNLMAMAK.D		2		600.3090	1198.6034	1198.5950	6.94	0	49	83738.6	1	3624
	R.GSFDFPVGDAISK.I		3		670.3342	1338.6538	1338.6456	6.12	0	46	78611.8	1	5373
	R.ADLEKLTSLSDR.Y		2		449.9129	1346.7170	1346.7041	9.53	1	15	25634.3	1	5490
	R.DSSTWLTAFVLK.I		1		684.3678	1366.7210	1366.7133	5.69	0	45	76902.8	1	5730
	R.LEEELQFSLGSK.I		2		690.3619	1378.7092	1378.6980	8.14	0	73	124753	1	5819
	K.AELADQAASWLTR.Q		1		477.9147	1430.7223	1430.7154	4.83	0	(30)	-51268.6	1	6462
	K.AELADQAASWLTR.Q		3		716.3696	1430.7246	1430.7154	6.45	0	93	158933	1	6464
	K.TEQWSMLPPETK.D		1		723.8516	1445.6886	1445.6861	1.74	0	24	41014.8	1	6653
	K.ILSLAQDQVGGSAEK.L	U	3		758.4098	1514.8050	1514.7940	7.27	0	96	164059	1	7471
	K.LQETATWLLSQQR.D		2		787.4255	1572.8365	1572.8260	6.70	0	69	117918	1	8053
	K.LQETATWLLSQQR.D		2		525.2862	1572.8367	1572.8260	6.84	0	(43)	-73484.9	1	8055
	R.DDGPFHDPCPVIHR.E		3		554.5906	1660.7499	1660.7417	4.97	0	32	54686.5	1	8963
	R.DDGPFHDPCPVIHR.E		1		831.3824	1660.7503	1660.7417	5.24	0	(11)	-18798.5	1	8964
	R.DDGPFHDPCPVIHR.E		1		416.1957	1660.7539	1660.7417	7.35	0	(21)	-35888	1	8968
	K.EYLIMGLDGATYDLK.G		3		851.4299	1700.8453	1700.8331	7.18	0	78	133298	1	9322
	K.EYLIMGLDGATYDLK.G		1		567.9563	1700.8471	1700.8331	8.22	0	(28)	-47850.7	1	9323
	R.EPFLSCCQFAESLR.K	U	2		872.4006	1742.7867	1742.7756	6.36	0	90	153806	1	9630
	R.EEMVYELNPLDPLGR.T		1		887.9441	1773.8736	1773.8607	7.29	0	56	95701.3	1	9811
	K.LLSTLCSADVCQCAEGK.C		3		956.4381	1910.8617	1910.8536	4.21	0	69	117918	1	10874
	R.YLDKTEQWSMLPPETK.D		4		655.9976	1964.9709	1964.9553	7.90	1	(43)	-73484.9	1	11312
	R.YLDKTEQWSMLPPETK.D		4		983.4933	1964.9720	1964.9553	8.49	1	50	85447.6	1	11315
	R.TLEIPGNSDPNIIPEGDFK.S		1		686.0160	2055.0261	2055.0160	4.92	0	(3)	-5126.86	1	12000
	R.TLEIPGNSDPNIIPEGDFK.S		4		1028.5220	2055.0294	2055.0160	6.50	0	53	90574.5	1	12002
	R.LPQGCAEQT->M<-TLLAPTLAASR.Y		1	Oxidation (M)	749.0565	2244.1477	2244.1242	10.5	0	7	11962.7	1	13165
	R.YLDKTEQWS->M<-LPPETKDR.A		1	Oxidation (M)	751.6946	751.6946	2252.0619	-7.28	2	1	1708.95	2	13220
	K.GDPQYLLDSNSWIEEMPSER.M		3		789.3631	2365.0675	2365.0532	6.03	0	(43)	-73484.9	1	14052
	K.GDPQYLLDSNSWIEEMPSER.M		1		1183.5411	2365.0677	2365.0532	6.14	0	69	117918	1	14053
	K.GDPQYLLDSNSWIEE->M<-PSER.M		2	Oxidation (M)	1191.5389	2381.0633	2381.0481	6.38	0	(47)	-80320.7	1	14130
	K.GDPQYLLDSNSWIEE->M<-PSER.M		4	Oxidation (M)	794.6954	2381.0643	2381.0481	6.79	0	(44)	-75193.9	1	14131
	R.EGALHREEMVYELNPLDPLGR.T		2		813.4159	2437.2260	2437.2059	8.24	1	34	58104.4	1	14440
	R.EGALHREE->M<-VYELNPLDPLGR.T		1	Oxidation (M)	818.7448	2453.2126	2453.2009	4.78	1	(13)	-22216.4	1	14494
	R.LQLEPGKEYLIMGLDGATYDLK.G		2		823.1010	2466.2810	2466.2716	3.83	1	60	102537	1	14553
	R.LQLEPGKEYLIMGLDGATYDLK.G		1		1234.1487	2466.2828	2466.2716	4.55	1	(57)	-97410.3	1	14554
	R.VTASDPLEALGSEGALSPGGLASLLR.L		1		1241.1703	2480.3260	2480.3122	5.57	0	(17)	-29052.2	1	14643
	R.VTASDPLEALGSEGALSPGGLASLLR.L		1		827.7859	2480.3360	2480.3122	9.60	0	50	85447.6	1	14644
	R.LQLEPGKEYLI->M<-GLDGATYDLK.G		1	Oxidation (M)	828.4327	2482.2764	2482.2665	3.99	1	(27)	-46141.7	1	14649
	R.STQDTVVALDALSAYWIASYTAEEK.G		1		911.4551	2731.3436	2731.3228	7.60	0	0	0	1	15867
B0JYN6	Alpha-2-HS-glycoprotein OS=Bos taurus GN=AHSG PE=2 SV=1	39193	1637	81(57)	15(12)	5.45	39%	B0JYN6_uniprot		0.0020667	3.53188	-0.025	5.26
P12763	Alpha-2-HS-glycoprotein OS=Bos taurus GN=AHSG PE=1 SV=2	39193	1637	81(57)	15(12)		39%	P12763_uniprot			0
	Peptide	Unique	Matches	Modification	Observed	Mr(expt)	Mr(calc)	ppm	Miss	Score	#VALUE!	Rank	Query
	R.IRYFK.I	U	2		363.7204	725.4262	725.4224	5.27	1	18	30761.1	1	53
	R.AHYDLR.H	U	5		387.6999	773.3853	773.3820	4.23	0	31	52977.5	1	213
	K.QYGFCK.G	U	2		401.6837	801.3529	801.3480	6.15	0	19	32470.1	1	377
	K.CNLLAEK.Q	U	2		424.2235	846.4325	846.4269	6.57	0	49	83738.6	1	629
	K.HTLNQIDSVK.V	U	1		385.5448	1153.6126	1153.6091	2.98	0	(30)	-51268.6	1	3023
	K.HTLNQIDSVK.V	U	7		577.8152	1153.6159	1153.6091	5.91	0	73	124753	1	3029
	K->.<-QDGQFSVLFTK.C	U	6	Gln->pyro-Glu (N-term Q)	626.8180	1251.6215	1251.6136	6.36	0	(55)	-93992.4	1	4288
	K.QDGQFSVLFTK.C	U	10		635.3315	1268.6485	1268.6401	6.63	0	89	152097	1	4511
	K.CDSSPDSAEDVR.K	U	1		669.2709	1336.5272	1336.5201	5.28	0	79	135007	1	5356
	K.CDSSPDSAEDVRK.L	U	1		489.2150	1464.6232	1464.6151	5.52	1	(46)	-78611.8	1	6889
	K.CDSSPDSAEDVRK.L	U	1		733.3189	1464.6233	1464.6151	5.59	1	63	107664	1	6890
	K.TPIVGQPSIPGGPVR.L	U	3		492.2868	1473.8387	1473.8304	5.62	0	(40)	-68358.1	1	7051
	K.TPIVGQPSIPGGPVR.L	U	10		737.9278	1473.8410	1473.8304	7.24	0	65	111082	1	7056
	R.GYKHTLNQIDSVK.V	U	2		751.9056	1501.7966	1501.7889	5.15	1	(27)	-46141.7	1	7377
	R.GYKHTLNQIDSVK.V	U	2		376.4567	1501.7977	1501.7889	5.87	1	(21)	-35888	1	7379
	R.GYKHTLNQIDSVK.V	U	4		501.6067	1501.7984	1501.7889	6.35	1	68	116209	1	7380
	K.EVVDPTKCNLLAEK.Q	U	3		539.2864	1614.8375	1614.8287	5.45	1	(47)	-80320.7	1	8511
	K.EVVDPTKCNLLAEK.Q	U	3		808.4265	1614.8385	1614.8287	6.06	1	76	129880	1	8513
	R->.<-QQTQHAVEGDCDIHVLK.Q	U	2	Gln->pyro-Glu (N-term Q)	980.9677	1959.9209	1959.9109	5.08	0	(53)	-90574.5	1	11272
	R->.<-QQTQHAVEGDCDIHVLK.Q	U	1	Gln->pyro-Glu (N-term Q)	654.3157	1959.9254	1959.9109	7.38	0	(70)	-119627	1	11274
	R.QQTQHAVEGDCDIHVLK.Q	U	2		495.2436	1976.9454	1976.9374	4.01	0	(59)	-100828	1	11401
	R.QQTQHAVEGDCDIHVLK.Q	U	2		989.4805	1976.9465	1976.9374	4.59	0	72	123045	1	11402
	R.QQTQHAVEGDCDIHVLK.Q	U	2		659.9896	1976.9469	1976.9374	4.76	0	(53)	-90574.5	1	11403
	R.HTFSGVASVESSSGEAFHVGK.T	U	1		707.3441	2119.0105	2118.9971	6.35	0	31	52977.5	1	12430
	K.EPACDDPDTEQAALAAVDYINK.H	U	2		1203.5488	2405.0831	2405.0693	5.76	0	96	164059	1	14274
	K.EPACDDPDTEQAALAAVDYINK.H	U	3		802.7025	2405.0855	2405.0693	6.76	0	(60)	-102537	1	14277
	R.QQTQHAVEGDCDIHVLKQDGQFSVLFTK.C	U	1		1076.8691	3227.5856	3227.5670	5.76	1	7	11962.7	1	16981
K4JDR8	Alpha-2-macroglobulin variant 5 OS=Bos taurus GN=A2M PE=2 SV=1	45388	1539	78(53)	15(13)	2.79	46%	K4JDR8_uniprot		0.00171852	2.93686	-0.125	7.08
	Peptide	Unique	Matches	Modification	Observed	Mr(expt)	Mr(calc)	ppm	Miss	Score	#VALUE!	Rank	Query
	K.YNILPK.K		5		374.2260	746.4375	746.4326	6.46	0	42	71776	1	109
	R.DLKPAIVK.V		4		442.2871	882.5597	882.5538	6.68	0	35	59813.3	1	851
	K.FQVENSNR.L		1		497.2426	992.4707	992.4675	3.15	0	55	93992.4	1	1481
	R.YGAATFTSAR.K		6		522.7631	1043.5117	1043.5036	7.75	0	61	104246	1	1903
	R.VLTEDIYQPR.A	U	3		411.8890	1232.6451	1232.6401	4.07	0	(36)	-61522.3	1	4019
	R.VLTEDIYQPR.A	U	6		617.3306	1232.6467	1232.6401	5.37	0	69	117918	1	4024
	R.NALFCLDSAWK.S		7		662.8244	1323.6342	1323.6281	4.61	0	75	128171	1	5273
	R.NALFCLDSAWK.S		1		442.2191	1323.6354	1323.6281	5.51	0	(12)	-20507.4	1	5276
	K.MVSGFIPLKPTVK.M		3		708.9213	1415.8281	1415.8210	4.99	0	(35)	-59813.3	1	6270
	K.MVSGFIPLKPTVK.M		2		472.9501	1415.8286	1415.8210	5.31	0	(26)	-44432.8	1	6272
	K.->M<-VSGFIPLKPTVK.M		4	Oxidation (M)	716.9198	1431.8250	1431.8160	6.34	0	42	71776	1	6484
	K.->M<-VSGFIPLKPTVK.M		2	Oxidation (M)	478.2828	1431.8266	1431.8160	7.43	0	(19)	-32470.1	1	6485
	R.TEVLTSLYEEAVK.E		3		741.3932	1480.7719	1480.7661	3.97	0	74	126462	1	7149
	R.TEVLTSLYEEAVK.E		2		494.5986	1480.7741	1480.7661	5.40	0	(19)	-32470.1	1	7150
	K.ALLAYAFALAGNQER.R		1		804.4346	1606.8547	1606.8467	4.99	0	96	164059	1	8451
	R.RTEVLTSLYEEAVK.E		3		819.4464	1636.8781	1636.8672	6.71	1	80	136716	1	8745
	R.RTEVLTSLYEEAVK.E		3		546.6334	1636.8784	1636.8672	6.88	1	(59)	-100828	1	8747
	R.TEVSNNHVLIYLDK.V		3		822.9370	1643.8593	1643.8519	4.55	0	80	136716	1	8824
	R.TEVSNNHVLIYLDK.V		2		548.9612	1643.8617	1643.8519	5.99	0	(35)	-59813.3	1	8825
	K.EDNTIHWTRPQKPR.V		3		593.3108	1776.9107	1776.9019	4.94	0	22	37596.9	1	9831
	K.EDNTIHWTRPQKPR.V		2		889.4632	1776.9118	1776.9019	5.57	0	(12)	-20507.4	1	9835
	K.KDEFPFALEVQTLPQTCDGPK.A		1		1210.5969	2419.1793	2419.1730	2.61	1	(41)	-70067	1	14345
	K.KDEFPFALEVQTLPQTCDGPK.A		5		807.4028	2419.1865	2419.1730	5.58	1	74	126462	1	14346
	K.QQNCQGGFSSTQDTVVALHALSR.Y		4		835.4094	2503.2063	2503.1874	7.53	0	100	170895	1	14746
	K.VYDYYETDEFAVAEYSAPCSK.D		2		836.3595	2506.0567	2506.0522	1.78	0	10	17089.5	1	14754
Q95121	Pigment epithelium-derived factor OS=Bos taurus GN=SERPINF1 PE=1 SV=1	46314	1422	57(44)	16(14)	2.22	37%	Q95121_uniprot		0.00123073	2.10326	-0.18	6.57
	Peptide	Unique	Matches	Modification	Observed	Mr(expt)	Mr(calc)	ppm	Miss	Score	#VALUE!	Rank	Query
	K.ASFIPPLEK.S	U	5		501.2905	1000.5665	1000.5593	7.19	0	28	47850.7	1	1559
	K.LSYEGELTK.S	U	3		520.2718	1038.5290	1038.5233	5.50	0	45	76902.8	1	1879
	K.TVQAVLTIPK.L	U	2		535.3382	1068.6618	1068.6543	7.07	0	46	78611.8	1	2145
	K.DLLASVTAPQK.N	U	3		571.8283	1141.6421	1141.6343	6.82	0	69	117918	1	2937
	R.YGLDSDLNCK.I	U	2		592.7698	1183.5250	1183.5179	5.98	0	42	71776	1	3444
	R.IKASFIPPLEK.S	U	1		414.9223	1241.7452	1241.7383	5.50	1	16	27343.2	1	4138
	R.DTDTGALLFIGK.I	U	6		625.8379	1249.6612	1249.6554	4.64	0	65	111082	1	4257
	K.LKLSYEGELTK.S	U	3		640.8632	1279.7119	1279.7023	7.47	1	50	85447.6	1	4646
	K.VPMMSDPQAVLR.Y	U	3		672.3484	1342.6823	1342.6737	6.43	0	66	112791	1	5414
	K.VPM->M<-SDPQAVLR.Y	U	2	Oxidation (M)	680.3448	1358.6750	1358.6686	4.70	0	(37)	-63231.2	1	5629
	K.VP->M<-MSDPQAVLR.Y	U	4	Oxidation (M)	680.3459	1358.6772	1358.6686	6.32	0	(62)	-105955	1	5633
	K.LQSLFDAPDFSK.I	U	3		684.3490	1366.6834	1366.6769	4.81	0	55	93992.4	1	5728
	K.TSLEDFYLDEER.T	U	4		758.8483	1515.6820	1515.6729	6.00	0	82	140134	1	7477
	K.LAAAVSNFGYDLYR.V	U	3		780.3997	1558.7848	1558.7780	4.36	0	97	165768	1	7905
	R.KTSLEDFYLDEER.T	U	2		548.9346	1643.7819	1643.7679	8.53	1	(38)	-64940.2	1	8819
	R.KTSLEDFYLDEER.T	U	2		822.8982	1643.7819	1643.7679	8.57	1	81	138425	1	8821
	R.TVKVPMMSDPQAVLR.Y	U	2		557.9716	1670.8929	1670.8848	4.83	1	13	22216.4	1	9092
	R.VDLQEINNWVQAQMK.G	U	1		908.4612	1814.9078	1814.8985	5.13	0	68	116209	1	10115
	R.VDLQEINNWVQAQ->M<-K.G	U	1	Oxidation (M)	916.4633	1830.9121	1830.8934	10.2	0	(14)	-23925.3	1	10189
	R.VGFEWNEDGAGTNSSPGVQPAR.L	U	2		1138.0289	2274.0433	2274.0302	5.79	0	152	259761	1	13428
	R.VGFEWNEDGAGTNSSPGVQPAR.L	U	3		759.0218	2274.0437	2274.0302	5.97	0	(61)	-104246	1	13429
P81187	Complement factor B OS=Bos taurus GN=CFB PE=1 SV=2	86737	1366	76(49)	30(24)	2.53	36%	P81187_uniprot		0.000876212	1.4974	-0.462	7.87
	Peptide	Unique	Matches	Modification	Observed	Mr(expt)	Mr(calc)	ppm	Miss	Score	#VALUE!	Rank	Query
	R.KEWEVK.E	U	1		409.7256	817.4366	817.4334	3.90	1	26	44432.8	1	456
	R.YLLDIGR.N	U	3		425.2475	848.4804	848.4756	5.66	0	46	78611.8	1	654
	K.EILFHPK.Y	U	2		442.2578	882.5011	882.4963	5.44	0	21	35888	1	847
	R.VTYYCNR.G	U	1		488.2228	974.4311	974.4280	3.15	0	37	63231.2	1	1334
	K.DVSEVVTPR.F	U	1		501.2699	1000.5253	1000.5189	6.37	0	38	64940.2	1	1555
	R.CYDGYTLR.G	U	2		524.2353	1046.4560	1046.4491	6.59	0	45	76902.8	1	1930
	K.LQNEDLGFL.-	U	3		524.7720	1047.5295	1047.5237	5.58	0	21	35888	1	1945
	K.GDSGGPLIIHK.R	U	1		547.3070	1092.5995	1092.5928	6.14	0	53	90574.5	1	2363
	K.GDSGGPLIIHK.R	U	2		365.2072	1092.5996	1092.5928	6.28	0	(34)	-58104.4	1	2364
	R.DALRAPGYEK.V	U	2		373.8657	1118.5752	1118.5720	2.91	1	(21)	-35888	1	2642
	R.DALRAPGYEK.V	U	2		560.2958	1118.5771	1118.5720	4.59	1	46	78611.8	1	2644
	K.RPQQVPGYAR.D	U	1		586.3227	1170.6308	1170.6258	4.31	0	42	71776	1	3308
	K.NCLRDFIEK.V	U	2		398.8715	1193.5926	1193.5863	5.26	1	(8)	-13671.6	1	3563
	K.NCLRDFIEK.V	U	2		597.8045	1193.5944	1193.5863	6.85	1	28	47850.7	1	3564
	K.VKDVSEVVTPR.F	U	3		410.2364	1227.6875	1227.6823	4.24	1	60	102537	1	3960
	K.VKDVSEVVTPR.F	U	3		614.8513	1227.6881	1227.6823	4.70	1	(42)	-71776	1	3961
	K.DIEALFVSESK.K	U	1		619.3226	1236.6306	1236.6238	5.52	0	43	73484.9	1	4080
	K.YGLVTYATEPK.V	U	3		621.3276	1240.6406	1240.6339	5.37	0	61	104246	1	4116
	K.GDSGGPLIIHKR.S	U	1		417.2394	1248.6964	1248.6939	2.03	1	(32)	-54686.5	1	4244
	K.GDSGGPLIIHKR.S	U	1		625.3561	1248.6976	1248.6939	3.00	1	74	126462	1	4245
	K.EKLQNEDLGFL.-	U	2		653.3422	1304.6699	1304.6612	6.65	1	25	42723.8	1	4985
	R.ALLEVYNMMSR.E	U	3		663.8351	1325.6556	1325.6471	6.39	0	64	109373	1	5292
	R.ALLEVYNM->M<-SR.E	U	1	Oxidation (M)	671.8334	1341.6522	1341.6421	7.55	0	(26)	-44432.8	1	5407
	K.DIEALFVSESKK.T	U	1		455.9161	1364.7264	1364.7187	5.64	1	25	42723.8	1	5718
	R.TLGLCGMVWEHK.D	U	1		715.8530	1429.6914	1429.6846	4.73	0	43	73484.9	1	6445
	R.TLGLCGMVWEHK.D	U	2		477.5713	1429.6920	1429.6846	5.12	0	(31)	-52977.5	1	6446
	R.STGSWSTLQTQDR.K	U	2		733.8511	1465.6877	1465.6797	5.44	0	67	114500	1	6908
	K.EWEVKEILFHPK.Y	U	2		777.9226	1553.8307	1553.8242	4.17	1	55	93992.4	1	7865
	R.STGSWSTLQTQDRK.I	U	1		797.9005	1593.7865	1593.7747	7.38	1	28	47850.7	1	8314
	K.GIPEFYDYDVALVR.L	U	2		552.9508	1655.8306	1655.8195	6.69	0	(60)	-102537	1	8928
	K.GIPEFYDYDVALVR.L	U	3		828.9230	1655.8315	1655.8195	7.24	0	76	129880	1	8929
	K.AKGIPEFYDYDVALVR.L	U	2		619.3285	1854.9636	1854.9516	6.50	1	43	73484.9	1	10373
	R.FLCTGGVDPYADPNTCK.G	U	2		957.9268	1913.8391	1913.8288	5.37	0	33	56395.4	1	10889
	K.LQGMENLEDVFVQMLDESR.T	U	1		751.6946	2252.0619	2252.0453	7.38	0	(9)	-15380.6	1	13220
	K.LQGMENLEDVFVQ->M<-LDESR.T	U	1	Oxidation (M)	757.0268	2268.0585	2268.0402	8.08	0	(43)	-73484.9	1	13385
	K.LQG->M<-ENLEDVFVQMLDESR.T	U	1	Oxidation (M)	757.0273	2268.0600	2268.0402	8.73	0	(59)	-100828	1	13386
	K.LQG->M<-ENLEDVFVQMLDESR.T	U	1	Oxidation (M)	1135.0433	2268.0721	2268.0402	14.1	0	96	164059	1	13387
	K.SSEADWVTDQLNQINYADHK.L	U	2		1167.5422	2333.0699	2333.0560	5.97	0	(93)	-158933	1	13881
	K.SSEADWVTDQLNQINYADHK.L	U	3		778.6973	2333.0702	2333.0560	6.07	0	93	158933	1	13882
	K.SSEADWVTDQLNQINYADHK.L	U	1		584.2752	2333.0715	2333.0560	6.64	0	(7)	-11962.7	1	13885
	R.WDGETAICDDGATYCPNPGIPLGTR.K	U	1		912.7454	2735.2144	2735.1956	6.89	0	7	11962.7	1	15881
	R.VSDPKSSEADWVTDQLNQINYADHK.L	U	1		715.8439	2859.3464	2859.3311	5.34	1	26	44432.8	1	16209
	R.VSDPKSSEADWVTDQLNQINYADHK.L	U	2		954.1238	2859.3495	2859.3311	6.43	1	(8)	-13671.6	1	16211
	R.STTCQQQMQELLPAKDIEALFVSESK.K	U	1		994.4988	2980.4745	2980.4521	7.50	1	103	176022	1	16491
Q9N2I2	Plasma serine protease inhibitor OS=Bos taurus GN=SERPINA5 PE=1 SV=1	45439	1267	60(44)	17(16)	3.68	38%	Q9N2I2_uniprot		0.00132045	2.25659	-0.109	9.4
	Peptide	Unique	Matches	Modification	Observed	Mr(expt)	Mr(calc)	ppm	Miss	Score	#VALUE!	Rank	Query
	K.IVDLIK.S	U	6		350.7357	699.4568	699.4531	5.30	0	46	78611.8	1	5
	K.INDYVAK.Q	U	1		411.7228	821.4311	821.4283	3.44	0	44	75193.9	1	475
	K.HILFLGK.V	U	2		414.2628	826.5110	826.5065	5.41	0	37	63231.2	1	504
	R.LELYLPK.F	U	3		438.2686	874.5227	874.5164	7.29	0	51	87156.6	1	782
	K.KINDYVAK.Q	U	1		475.7704	949.5263	949.5233	3.26	1	37	63231.2	1	1185
	R.RLELYLPK.F	U	3		516.3199	1030.6252	1030.6175	7.52	1	27	46141.7	1	1843
	R.DFVFDLYR.A	U	3		537.7686	1073.5227	1073.5182	4.18	0	29	49559.6	1	2172
	R.LPIQEAFLGAMR.T	U	1		449.2478	1344.7217	1344.7224	-0.52	0	(20)	-34179	1	5457
	R.LPIQEAFLGAMR.T	U	4		673.3726	1344.7307	1344.7224	6.19	0	80	136716	1	5459
	R.LPIQEAFLGA->M<-R.T	U	5	Oxidation (M)	681.3707	1360.7268	1360.7173	6.98	0	(55)	-93992.4	1	5678
	R.EGEMEQVENGLK.E	U	2		681.8166	1361.6186	1361.6133	3.94	0	47	80320.7	1	5685
	K.QQDQFYYLLDR.N	U	2		744.8631	1487.7116	1487.7045	4.82	0	55	93992.4	1	7209
	R.EGEMEQVENGLKEK.T	U	3		810.3857	1618.7568	1618.7508	3.71	1	60	102537	1	8548
	R.EGEMEQVENGLKEK.T	U	1		540.5937	1618.7592	1618.7508	5.21	1	(30)	-51268.6	1	8549
	K.STHEQDFYVTPETVVR.V	U	3		954.4659	1906.9173	1906.9061	5.87	0	85	145261	1	10831
	K.STHEQDFYVTPETVVR.V	U	3		636.6472	1906.9197	1906.9061	7.09	0	(52)	-88865.5	1	10834
	R.TLYLADTFPTNFEDPEGAK.K	U	4		1065.0147	2128.0147	2128.0001	6.90	0	97	165768	1	12502
	R.TLYLADTFPTNFEDPEGAK.K	U	3		710.3458	2128.0157	2128.0001	7.33	0	(59)	-100828	1	12505
	R.TLYLADTFPTNFEDPEGAKK.K	U	2		753.0444	2256.1115	2256.0950	7.29	1	44	75193.9	1	13287
	R.TLYLADTFPTNFEDPEGAKKK.I	U	1		795.7407	2384.2002	2384.1900	4.27	2	11	18798.5	1	14150
	R.ELQQPQDSLQLSLGNALFTKPR.L	U	2		828.4509	2482.3308	2482.3180	5.16	0	41	70067	1	14650
	K.AQILEGLGIGPGEGSEEELHSASQR.L	U	1		641.8227	2563.2617	2563.2514	4.01	0	(28)	-47850.7	1	15091
	K.AQILEGLGIGPGEGSEEELHSASQR.L	U	3		855.4298	2563.2676	2563.2514	6.33	0	70	119627	1	15093
	K.AQILEGLGIGPGEGSEEELHSASQR.L	U	1		1282.6426	2563.2706	2563.2514	7.50	0	(64)	-109373	1	15094
A6QPP2	SERPIND1 protein OS=Bos taurus GN=SERPIND1 PE=2 SV=1	55457	1253	53(43)	18(15)	2.17	32%	A6QPP2_uniprot		0.000955695	1.63324	-0.134	6.37
	Peptide	Unique	Matches	Modification	Observed	Mr(expt)	Mr(calc)	ppm	Miss	Score	#VALUE!	Rank	Query
	K.VPMMQTK.G	U	1		417.7159	833.4173	833.4139	4.01	0	26	44432.8	1	530
	R.IVIDLFK.H	U	4		424.2701	846.5257	846.5215	4.94	0	55	93992.4	1	642
	R.NFGYTLR.S	U	2		435.7295	869.4445	869.4395	5.69	0	42	71776	1	738
	R.TREVLLPK.F	U	2		478.3034	954.5922	954.5862	6.30	1	19	32470.1	1	1207
	K.DYDLVGALR.A	U	2		511.2737	1020.5329	1020.5240	8.75	0	45	76902.8	1	1734
	R.ALGVTALFDK.H	U	2		517.8001	1033.5857	1033.5808	4.71	0	61	104246	1	1858
	R.SVSDLYVQK.Q	U	3		519.7793	1037.5440	1037.5393	4.56	0	34	58104.4	1	1870
	K->.<-QLPVLDDFK.T	U	1	Gln->pyro-Glu (N-term Q)	529.2849	1056.5551	1056.5492	5.65	0	48	82029.7	1	2052
	R.TSCLLFLGR.V	U	2		533.7931	1065.5716	1065.5641	7.06	0	50	85447.6	1	2141
	R.EYYFAEVR.A	U	3		538.7595	1075.5045	1075.4974	6.56	0	42	71776	1	2180
	R.EVVKVPMMQTK.G	U	2		645.3557	1288.6969	1288.6883	6.64	1	60	102537	1	4755
	K.LEKDYDLVGALR.A	U	1		696.3839	1390.7533	1390.7456	5.51	1	55	93992.4	1	5978
	K.TLESQLTPQAVER.W	U	4		736.3954	1470.7762	1470.7678	5.73	0	74	126462	1	7007
	K.TLESQLTPQAVER.W	U	2		491.2668	1470.7784	1470.7678	7.22	0	(39)	-66649.1	1	7011
	K->.<-QLPVLDDFKTQVR.E	U	2	Gln->pyro-Glu (N-term Q)	771.4252	1540.8358	1540.8250	7.02	1	77	131589	1	7724
	K.QLPVLDDFKTQVR.E	U	5		779.9372	1557.8598	1557.8515	5.35	1	(64)	-109373	1	7892
	K.QLPVLDDFKTQVR.E	U	2		520.2944	1557.8613	1557.8515	6.28	1	(51)	-87156.6	1	7893
	R.AADFSDPAFLAHTNR.H	U	3		816.8958	1631.7769	1631.7692	4.74	0	90	153806	1	8686
	R.AADFSDPAFLAHTNR.H	U	3		544.9335	1631.7786	1631.7692	5.74	0	(68)	-116209	1	8687
	K.FKLEKDYDLVGALR.A	U	1		417.4868	1665.9181	1665.9090	5.45	2	13	22216.4	1	9030
	K.GAFLAASDQELDCDVLR.L	U	3		940.4524	1878.8902	1878.8782	6.42	0	78	133298	1	10570
	R.DALQDVDPATQMLLLNCLYFK.G	U	1		823.4208	2467.2405	2467.2127	11.3	0	80	136716	1	14565
	R.DALQDVDPATQMLLLNCLYFK.G	U	1		1234.6288	2467.2430	2467.2127	12.3	0	(40)	-68358.1	1	14566
	R.DALQDVDPATQ->M<-LLLNCLYFK.G	U	1	Oxidation (M)	828.7471	2483.2194	2483.2076	4.73	0	(0)	0	1	14655
F1MSZ6	Antithrombin-III OS=Bos taurus GN=SERPINC1 PE=3 SV=1	52920	1170	68(42)	29(20)	3.80	55%	F1MSZ6_uniprot		0.00128496	2.19593	-0.209	6.38
	Peptide	Unique	Matches	Modification	Observed	Mr(expt)	Mr(calc)	ppm	Miss	Score	#VALUE!	Rank	Query
	K.ELFYK.A	U	1		350.1913	698.3681	698.3639	5.96	0	12	20507.4	1	1
	R.VWELSK.A	U	2		381.2160	760.4174	760.4119	7.26	0	42	71776	1	163
	K.FDTISEK.T	U	1		420.2120	838.4095	838.4072	2.66	0	35	59813.3	1	560
	K.LQPLDFK.G	U	2		430.7498	859.4850	859.4803	5.45	0	26	44432.8	1	684
	K.QLMEVFK.F	U	2		447.7444	893.4741	893.4681	6.81	0	15	25634.3	1	862
	R.LPGIVAEGR.S	U	5		456.2717	910.5288	910.5236	5.76	0	57	97410.3	1	969
	R.RVWELSK.A	U	1		459.2662	916.5178	916.5130	5.26	1	32	54686.5	1	1008
	K.LGACDNTLK.Q	U	1		496.2492	990.4838	990.4804	3.42	0	66	112791	1	1468
	K.SKFSPENTR.K	U	1		533.2726	1064.5307	1064.5251	5.33	1	25	42723.8	1	2124
	K.SRLPGIVAEGR.S	U	2		385.5614	1153.6624	1153.6567	4.88	1	(41)	-70067	1	3032
	K.SRLPGIVAEGR.S	U	2		577.8394	1153.6643	1153.6567	6.54	1	77	131589	1	3034
	R.SLNSDRVTFK.A	U	1		583.8146	1165.6147	1165.6091	4.80	1	23	39305.9	1	3191
	K.ANRPFLVLIR.E	U	1		400.2570	1197.7491	1197.7346	12.2	0	11	18798.5	1	3620
	R.FRIEDSFSVK.E	U	3		614.3249	1226.6353	1226.6295	4.74	1	(27)	-46141.7	1	3949
	R.FRIEDSFSVK.E	U	3		409.8859	1226.6358	1226.6295	5.07	1	47	80320.7	1	3950
	R.SDLYVSDAFHK.A	U	3		641.3122	1280.6098	1280.6037	4.77	0	46	78611.8	1	4654
	R.SDLYVSDAFHK.A	U	2		427.8773	1280.6102	1280.6037	5.08	0	(30)	-51268.6	1	4655
	K.GDDITMVLILPK.L	U	2		657.8747	1313.7348	1313.7265	6.36	0	21	35888	1	5112
	K.TSDQIHFFFAK.L	U	2		447.5621	1339.6644	1339.6561	6.18	0	(21)	-35888	1	5386
	K.TSDQIHFFFAK.L	U	2		670.8409	1339.6673	1339.6561	8.38	0	98	167477	1	5390
	R.SPVEDVCTAKPR.D	U	1		453.5645	1357.6716	1357.6660	4.13	0	64	109373	1	5620
	R.SPVEDVCTAKPR.D	U	1		679.8440	1357.6734	1357.6660	5.47	0	(63)	-107664	1	5622
	R.DIPVNPMCIYR.S	U	3		689.3398	1376.6650	1376.6581	5.04	0	47	80320.7	1	5785
	R.DIPVNP->M<-CIYR.S	U	1	Oxidation (M)	697.3390	1392.6634	1392.6530	7.50	0	(13)	-22216.4	1	5990
	R.VAESTQVLELPFK.G	U	2		730.9082	1459.8018	1459.7922	6.58	0	106	181149	1	6833
	K.LQPLDFKGNAEQSR.L	U	1		801.9243	1601.8341	1601.8161	11.2	1	40	68358.1	1	8403
	K->.<-QLMEVFKFDTISEK.T	U	1	Gln->pyro-Glu (N-term Q)	849.4319	1696.8492	1696.8382	6.48	1	(49)	-83738.6	1	9279
	K.QLMEVFKFDTISEK.T	U	1		572.2974	1713.8703	1713.8647	3.21	1	(32)	-54686.5	1	9436
	K.QLMEVFKFDTISEK.T	U	3		857.9441	1713.8736	1713.8647	5.18	1	67	114500	1	9438
	K.ATEGQGSEQKIPGATNR.R	U	1		581.9600	1742.8581	1742.8547	1.91	1	61	104246	1	9637
	K.ADGESCSVLMMYQESK.F	U	3		917.8920	1833.7694	1833.7583	6.05	0	82	140134	1	10201
	K.KATEGQGSEQKIPGATNR.R	U	1		936.4866	1870.9586	1870.9497	4.76	2	(5)	-8544.76	1	10528
	K.KATEGQGSEQKIPGATNR.R	U	2		624.6616	1870.9629	1870.9497	7.04	2	18	30761.1	1	10529
	K.EQLQDMGLEDLFSPEK.S	U	1		626.9680	1877.8822	1877.8717	5.62	0	40	68358.1	1	10564
	K.EQLQD->M<-GLEDLFSPEK.S	U	1	Oxidation (M)	947.9475	1893.8803	1893.8666	7.26	0	(9)	-15380.6	1	10702
	K.ATEGQGSEQKIPGATNRR.V	U	1		633.9964	1898.9674	1898.9558	6.08	2	18	30761.1	1	10745
	K.ANSHFATAFYQHLADSK.N	U	2		636.6427	1906.9063	1906.8962	5.29	0	11	18798.5	1	10827
	K.AFLEVNEEGSEAAASTVISIAGR.S	U	2		774.3994	2320.1762	2320.1546	9.30	0	69	117918	1	13822
	R.IEDSFSVKEQLQDMGLEDLFSPEK.S	U	1		928.7886	2783.3441	2783.3211	8.25	1	89	152097	1	16010
F1N1I6	Gelsolin OS=Bos taurus GN=GSN PE=4 SV=1	85976	960	63(39)	27(21)	1.96	38%	F1N1I6_uniprot		0.000732763	1.25226	-0.409	5.86
	Peptide	Unique	Matches	Modification	Observed	Mr(expt)	Mr(calc)	ppm	Miss	Score	#VALUE!	Rank	Query
	R.TPITVVK.Q	U	1		379.2461	756.4776	756.4745	4.07	0	24	41014.8	1	147
	R.AVEVMPK.A	U	1		387.2165	772.4185	772.4153	4.13	0	39	66649.1	1	209
	K.TASDFISK.M	U	2		434.7270	867.4394	867.4338	6.43	0	37	63231.2	1	719
	K.TGALELLR.V	U	3		436.7667	871.5188	871.5127	6.97	0	68	116209	1	757
	R.RTPITVVK.Q	U	1		457.2973	912.5800	912.5757	4.75	1	25	42723.8	1	987
	K.EPGLQIWR.V	U	2		499.7782	997.5418	997.5345	7.31	0	41	70067	1	1534
	R.YIETDPANR.D	U	2		539.7633	1077.5121	1077.5091	2.79	0	42	71776	1	2192
	K.RYIETDPANR.D	U	1		617.8144	1233.6143	1233.6102	3.39	1	0	0	1	4033
	K.AGKEPGLQIWR.V	U	2		418.9054	1253.6944	1253.6880	5.06	1	53	90574.5	1	4320
	K.AGKEPGLQIWR.V	U	2		627.8556	1253.6966	1253.6880	6.85	1	(37)	-63231.2	1	4322
	K.HVVPNEVVVQR.L	U	2		638.3652	1274.7158	1274.7095	4.91	0	61	104246	1	4577
	K.HVVPNEVVVQR.L	U	1		425.9131	1274.7174	1274.7095	6.13	0	(42)	-71776	1	4578
	R.LATPARPGATQAR.A	U	1		655.3717	1308.7288	1308.7262	2.01	0	(1)	-1708.95	1	5057
	R.LATPARPGATQAR.A	U	1		437.2505	1308.7298	1308.7262	2.76	0	35	59813.3	1	5058
	K.AGALNSNDAFVLK.T	U	3		660.3558	1318.6970	1318.6881	6.74	0	55	93992.4	1	5201
	R.SEDCFILDHGK.D	U	2		440.8704	1319.5893	1319.5816	5.86	0	18	30761.1	1	5215
	R.YIETDPANRDR.R	U	1		675.3274	1348.6402	1348.6371	2.31	1	25	42723.8	1	5509
	R.YIETDPANRDR.R	U	1		450.5541	1348.6406	1348.6371	2.58	1	(16)	-27343.2	1	5510
	R.SEDCFILDHGKDGK.I	U	1		810.8729	1619.7313	1619.7250	3.90	1	47	80320.7	1	8558
	R.SEDCFILDHGKDGK.I	U	1		540.9187	1619.7343	1619.7250	5.74	1	(31)	-52977.5	1	8559
	K.DSQEEEKTEALTSAK.R	U	1		555.9336	1664.7789	1664.7740	2.94	1	65	111082	1	9013
	K.DSQEEEKTEALTSAK.R	U	1		833.3995	1664.7844	1664.7740	6.22	1	(53)	-90574.5	1	9018
	R.EVQGFESATFLGYFK.S	U	1		861.9287	1721.8429	1721.8301	7.42	0	95	162350	1	9503
	K.TPSAAYLWVGAGASEAEK.T	U	3		904.4514	1806.8881	1806.8788	5.17	0	97	165768	1	10042
	K.TPSAAYLWVGAGASEAEK.T	U	2		603.3039	1806.8898	1806.8788	6.11	0	(12)	-20507.4	1	10044
	R->.<-QTQVSVLPEGGETPLFK.Q	U	1	Gln->pyro-Glu (N-term Q)	906.9769	1811.9393	1811.9306	4.83	0	(12)	-20507.4	1	10090
	K.DSQEEEKTEALTSAKR.Y	U	1		607.9677	1820.8813	1820.8752	3.38	2	40	68358.1	1	10145
	R.QTQVSVLPEGGETPLFK.Q	U	4		915.4915	1828.9685	1828.9571	6.23	0	68	116209	1	10178
	R.VTEARPGSMVVEHPEFLK.A	U	1		676.0231	2025.0474	2025.0353	5.95	0	27	46141.7	1	11785
	R.VTEARPGSMVVEHPEFLK.A	U	1		1013.5317	2025.0488	2025.0353	6.65	0	(16)	-27343.2	1	11786
	R.AQPVQVAEGSEPDSFWEALGGK.A	U	2		1151.5607	2301.1068	2301.0913	6.71	0	80	136716	1	13701
	R.AQPVQVAEGSEPDSFWEALGGK.A	U	2		768.0433	2301.1080	2301.0913	7.23	0	(66)	-112791	1	13702
	R.DPDQTDGPGLSYLSSHIANVER.V	U	1		791.0469	2370.1190	2370.1088	4.31	0	22	37596.9	1	14073
	R.VPFDAATLHTSTAMAAQHGMDDDGR.G	U	1		872.3945	2614.1618	2614.1541	2.95	0	21	35888	1	15323
	R.VPFDAATLHTSTAMAAQHGMDDDGR.G	U	2		654.5501	2614.1713	2614.1541	6.61	0	(16)	-27343.2	1	15325
	K.NWRDPDQTDGPGLSYLSSHIANVER.V	U	2		943.1214	2826.3424	2826.3321	3.63	1	(44)	-75193.9	1	16154
	K.NWRDPDQTDGPGLSYLSSHIANVER.V	U	1		707.5938	2826.3461	2826.3321	4.96	1	49	83738.6	1	16155
	R.VHVSEEGAEPEAMLEVLGPKPALPAGTEDTAKEDAANR.K	U	3		982.9937	3927.9455	3927.9160	7.52	1	21	35888	1	18313
	R.VHVSEEGAEPEAMLEVLGPKPALPAGTEDTAKEDAANRK.L	U	2		1015.0210	4056.0549	4056.0109	10.8	2	11	18798.5	1	18573
F1MYN5	Fibulin-1 OS=Bos taurus GN=FBLN1 PE=3 SV=2	81540	939	60(41)	17(14)	1.29	21%	F1MYN5_uniprot		0.000735835	1.25751	-0.303	4.94
A5D7S8	Fibulin-1 OS=Bos taurus GN=FBLN1 PE=2 SV=1	81527	939	60(41)	17(14)		21%	A5D7S8_uniprot			0
	Peptide	Unique	Matches	Modification	Observed	Mr(expt)	Mr(calc)	ppm	Miss	Score	#VALUE!	Rank	Query
	R.DSFDIIK.R	U	1		419.2234	836.4323	836.4280	5.15	0	31	52977.5	1	546
	R.DSFDIIKR.Y	U	3		497.2756	992.5366	992.5291	7.62	1	41	70067	1	1486
	K.AGYYFDGISR.T	U	3		574.7758	1147.5371	1147.5298	6.34	0	42	71776	1	2985
	R.TCVDINECR.R	U	1		583.7518	1165.4891	1165.4856	3.01	0	52	88865.5	1	3185
	R.GYHLNEEGTR.C	U	1		392.5204	1174.5394	1174.5367	2.34	0	(22)	-37596.9	1	3330
	R.GYHLNEEGTR.C	U	1		588.2777	1174.5409	1174.5367	3.56	0	43	73484.9	1	3331
	R.RSTDALRQEK.T	U	1		401.8874	1202.6403	1202.6367	2.94	2	24	41014.8	1	3696
	R.YMDGMTVGVVR.Q	U	5		614.3004	1226.5863	1226.5788	6.12	0	62	105955	1	3942
	R.CCHCCLLGR.A	U	2		618.2523	1234.4900	1234.4828	5.82	0	23	39305.9	1	4043
	R.YMDG->M<-TVGVVR.Q	U	2	Oxidation (M)	622.2972	1242.5798	1242.5737	4.92	0	(33)	-56395.4	1	4141
	R.Y->M<-DGMTVGVVR.Q	U	8	Oxidation (M)	622.2992	1242.5838	1242.5737	8.15	0	(62)	-105955	1	4145
	R.TCVDINECRR.Y	U	1		441.5372	1321.5899	1321.5867	2.39	1	27	46141.7	1	5243
	R.TCVDINECRR.Y	U	1		661.8024	1321.5902	1321.5867	2.64	1	(25)	-42723.8	1	5244
	R.CLAFECPENYR.R	U	2		729.8159	1457.6173	1457.6067	7.23	0	55	93992.4	1	6803
	R.EFTRPEEIIFLR.A	U	3		517.2872	1548.8399	1548.8300	6.37	0	(32)	-54686.5	1	7808
	R.EFTRPEEIIFLR.A	U	3		775.4279	1548.8413	1548.8300	7.29	0	49	83738.6	1	7809
	R.CLAFECPENYRR.S	U	2		807.8652	1613.7159	1613.7079	4.99	1	37	63231.2	1	8500
	R.CLAFECPENYRR.S	U	3		538.9128	1613.7165	1613.7079	5.36	1	(21)	-35888	1	8501
	K.VSEIEEEQEDPYLNDR.C	U	3		982.9457	1963.8768	1963.8647	6.19	0	100	170895	1	11293
	K.VSEIEEEQEDPYLNDR.C	U	2		655.6331	1963.8774	1963.8647	6.47	0	(45)	-76902.8	1	11294
	K.GQETADFAPGDGGDLQETAK.V	U	2		669.6397	2005.8973	2005.8865	5.38	0	(36)	-61522.3	1	11608
	K.GQETADFAPGDGGDLQETAK.V	U	4		1003.9576	2005.9006	2005.8865	7.03	0	107	182858	1	11613
	K.VSEIEEEQEDPYLNDRCR.G	U	1		761.0117	2280.0133	2279.9964	7.42	1	16	27343.2	1	13477
	R.AITPAYPANHADIIFDITDGNLR.D	U	1		1249.6405	2497.2664	2497.2601	2.54	0	46	78611.8	1	14712
	R.AITPAYPANHADIIFDITDGNLR.D	U	1		833.4327	2497.2764	2497.2601	6.52	0	(13)	-22216.4	1	14713
	K.GQETADFAPGDGGDLQETAKVSEIEEEQEDPYLNDR.C	U	1		988.9454	3951.7524	3951.7406	2.98	1	12	20507.4	1	18367
	K.GQETADFAPGDGGDLQETAKVSEIEEEQEDPYLNDR.C	U	2		1318.2653	3951.7740	3951.7406	8.44	1	(7)	-11962.7	1	18369
	Peptide	Unique	Matches	Modification	Observed	Mr(expt)	Mr(calc)	ppm	Miss	Score	#VALUE!	Rank	Query
	K.IAFDKGR.T		1		403.7309	805.4473	805.4446	3.33	1	42	71776	1	400
	K.FPVFMGR.V		3		427.2255	852.4365	852.4316	5.69	0	35	59813.3	1	679
	K.FPVF->M<-GR.V		9	Oxidation (M)	435.2229	868.4313	868.4266	5.47	0	(11)	-18798.5	1	725
	K.DTFAEASQR.L		2		512.7407	1023.4668	1023.4621	4.53	0	42	71776	1	1767
	K.YPVASFTDR.T		3		528.2648	1054.5151	1054.5084	6.40	0	58	99119.2	1	2030
	R.TSTKPFHLK.S		2		353.5396	1057.5969	1057.5920	4.62	0	(23)	-39305.9	1	2064
	R.TSTKPFHLK.S		2		529.8060	1057.5975	1057.5920	5.18	0	29	49559.6	1	2065
	R.LYQDFSVLK.K		5		556.8067	1111.5988	1111.5914	6.74	0	54	92283.4	1	2556
	R.LLDSLPEDTR.L		3		579.8077	1157.6009	1157.5928	7.02	0	74	126462	1	3099
	K.KYPVASFTDR.T		6		395.2103	1182.6091	1182.6033	4.87	1	(45)	-76902.8	1	3434
	K.KYPVASFTDR.T		4		592.3120	1182.6095	1182.6033	5.20	1	52	88865.5	1	3435
	K.FHPTHLTMPR.I		3		412.8835	1235.6288	1235.6234	4.40	0	(13)	-22216.4	1	4062
	K.FHPTHLTMPR.I		1		618.8232	1235.6319	1235.6234	6.94	0	(9)	-15380.6	1	4065
	R.LYQDFSVLKK.R		2		414.2381	1239.6925	1239.6863	4.97	1	(35)	-59813.3	1	4111
	R.LYQDFSVLKK.R		2		620.8541	1239.6936	1239.6863	5.85	1	45	76902.8	1	4113
	K.FHPTHLT->M<-PR.I		1	Oxidation (M)	418.2152	1251.6237	1251.6183	4.35	0	24	41014.8	1	4294
	R.RLLDSLPEDTR.L		2		438.9085	1313.7037	1313.6939	7.45	1	(35)	-59813.3	1	5105
	R.RLLDSLPEDTR.L		3		657.8591	1313.7037	1313.6939	7.46	1	55	93992.4	1	5106
	R.SAEAVLGEALTDFSLR.L		4		839.9438	1677.8730	1677.8573	9.35	0	83	141843	1	9156
	R.SAEAVLGEALTDFSLR.L		2		560.2983	1677.8732	1677.8573	9.44	0	(51)	-87156.6	1	9157
	R.HQATLELTESGVEATAASVVSVAR.N	U	1		809.4273	2425.2601	2425.2449	6.28	0	71	121336	1	14376
P50448	Factor XIIa inhibitor OS=Bos taurus PE=1 SV=1	51919	902	61(41)	13(12)	1.67	24%	P50448_uniprot		0.00117491	2.00786	-0.072	6.19
	Peptide	Unique	Matches	Modification	Observed	Mr(expt)	Mr(calc)	ppm	Miss	Score	#VALUE!	Rank	Query
	K.IAFDKGR.T		1		403.7309	805.4473	805.4446	3.33	1	42	71776	1	400
	K.FPVFMGR.V		3		427.2255	852.4365	852.4316	5.69	0	35	59813.3	1	679
	K.FPVF->M<-GR.V		9	Oxidation (M)	435.2229	868.4313	868.4266	5.47	0	(11)	-18798.5	1	725
	K.DTFAEASQR.L		2		512.7407	1023.4668	1023.4621	4.53	0	42	71776	1	1767
	K.YPVASFTDR.T		3		528.2648	1054.5151	1054.5084	6.40	0	58	99119.2	1	2030
	R.TSTKPFHLK.S		2		353.5396	1057.5969	1057.5920	4.62	0	(23)	-39305.9	1	2064
	R.TSTKPFHLK.S		2		529.8060	1057.5975	1057.5920	5.18	0	29	49559.6	1	2065
	R.LYQDFSVLK.K		5		556.8067	1111.5988	1111.5914	6.74	0	54	92283.4	1	2556
	R.LLDSLPEDTR.L		3		579.8077	1157.6009	1157.5928	7.02	0	74	126462	1	3099
	K.KYPVASFTDR.T		6		395.2103	1182.6091	1182.6033	4.87	1	(45)	-76902.8	1	3434
	K.KYPVASFTDR.T		4		592.3120	1182.6095	1182.6033	5.20	1	52	88865.5	1	3435
	K.FHPTHLTMPR.I		3		412.8835	1235.6288	1235.6234	4.40	0	(13)	-22216.4	1	4062
	K.FHPTHLTMPR.I		1		618.8232	1235.6319	1235.6234	6.94	0	(9)	-15380.6	1	4065
	R.LYQDFSVLKK.R		2		414.2381	1239.6925	1239.6863	4.97	1	(35)	-59813.3	1	4111
	R.LYQDFSVLKK.R		2		620.8541	1239.6936	1239.6863	5.85	1	45	76902.8	1	4113
	K.FHPTHLT->M<-PR.I		1	Oxidation (M)	418.2152	1251.6237	1251.6183	4.35	0	24	41014.8	1	4294
	R.RLLDSLPEDTR.L		2		438.9085	1313.7037	1313.6939	7.45	1	(35)	-59813.3	1	5105
	R.RLLDSLPEDTR.L		3		657.8591	1313.7037	1313.6939	7.46	1	55	93992.4	1	5106
	R.SAEAVLGEALTDFSLR.L		4		839.9438	1677.8730	1677.8573	9.35	0	83	141843	1	9156
	R.SAEAVLGEALTDFSLR.L		2		560.2983	1677.8732	1677.8573	9.44	0	(51)	-87156.6	1	9157
	R.HQATLELTESGVDATAASVVSVAR.N	U	1		804.7549	2411.2430	2411.2292	5.71	0	54	92283.4	1	14308
P17690	Beta-2-glycoprotein 1 OS=Bos taurus GN=APOH PE=1 SV=4	39538	883	65(41)	15(13)	3.61	41%	P17690_uniprot		0.00164399	2.8095	-0.267	8.53
	Peptide	Unique	Matches	Modification	Observed	Mr(expt)	Mr(calc)	ppm	Miss	Score	#VALUE!	Rank	Query
	K.VSFFCK.H	U	3		394.1958	786.3770	786.3735	4.49	0	36	61522.3	1	248
	K.TDASDVKPC.-	U	1		496.7241	991.4336	991.4281	5.61	0	36	61522.3	1	1476
	R.ATVIYEGER.V	U	3		519.2697	1036.5249	1036.5189	5.75	0	40	68358.1	1	1863
	K.EHSSLAFWK.T	U	3		368.8557	1103.5453	1103.5400	4.82	0	(19)	-32470.1	1	2465
	K.EHSSLAFWK.T	U	5		552.7806	1103.5466	1103.5400	6.01	0	35	59813.3	1	2469
	K.RATVIYEGER.V	U	1		597.3192	1192.6239	1192.6200	3.23	1	51	87156.6	1	3544
	K.RATVIYEGER.V	U	1		398.5491	1192.6255	1192.6200	4.58	1	(23)	-39305.9	1	3545
	K.CFKEHSSLAFWK.T	U	1		513.9213	1538.7422	1538.7340	5.30	1	9	15380.6	1	7693
	R.TCPKPDELPFSTVVPLK.R	U	3		964.5200	1927.0255	1927.0125	6.74	0	44	75193.9	1	11024
	R.TCPKPDELPFSTVVPLK.R	U	4		643.3492	1927.0257	1927.0125	6.86	0	(35)	-59813.3	1	11025
	R.TCPKPDELPFSTVVPLKR.T	U	2		1042.5704	2083.1263	2083.1136	6.10	1	(21)	-35888	1	12198
	R.TCPKPDELPFSTVVPLKR.T	U	3		695.3832	2083.1277	2083.1136	6.77	1	(43)	-73484.9	1	12200
	R.TCPKPDELPFSTVVPLKR.T	U	3		521.7893	2083.1281	2083.1136	6.98	1	51	87156.6	1	12201
	K.CSYTEDAQCIDGTIEIPK.C	U	2		700.6506	2098.9299	2098.9187	5.32	0	(40)	-68358.1	1	12264
	K.CSYTEDAQCIDGTIEIPK.C	U	6		1050.4734	2098.9322	2098.9187	6.44	0	68	116209	1	12266
	R.TYEPGEQIVFSCQPGYVSR.G	U	3		1109.0228	2216.0311	2216.0208	4.64	0	74	126462	1	12991
	R.TYEPGEQIVFSCQPGYVSR.G	U	5		739.6844	2216.0313	2216.0208	4.74	0	(59)	-100828	1	12992
	K.KCSYTEDAQCIDGTIEIPK.C	U	2		743.3495	2227.0266	2227.0137	5.82	1	50	85447.6	1	13054
	K.KCSYTEDAQCIDGTIEIPK.C	U	2		1114.5245	2227.0345	2227.0137	9.37	1	(24)	-41014.8	1	13056
	K.WSPDLPVCAPITCPPPPIPK.F	U	1		748.0584	2241.1532	2241.1326	9.19	0	21	35888	1	13148
	K.WSPDLPVCAPITCPPPPIPK.F	U	2		1121.5842	2241.1539	2241.1326	9.49	0	(9)	-15380.6	1	13149
	K.RTYEPGEQIVFSCQPGYVSR.G	U	2		791.7196	2372.1370	2372.1219	6.34	1	51	87156.6	1	14088
	K.DTATFGCHETYSLDGPEEVECSK.F	U	1		1316.5526	2631.0907	2631.0741	6.29	0	(15)	-25634.3	1	15416
	K.DTATFGCHETYSLDGPEEVECSK.F	U	4		878.0389	2631.0948	2631.0741	7.86	0	54	92283.4	1	15419
	K.CTEEGKWSPDLPVCAPITCPPPPIPK.F	U	2		982.8171	2945.4294	2945.4126	5.72	1	49	83738.6	1	16436
P00735	Prothrombin OS=Bos taurus GN=F2 PE=1 SV=2	71886	858	55(31)	25(15)	2.05	42%	P00735_uniprot		0.0007651	1.30752	-0.583	5.97
	Peptide	Unique	Matches	Modification	Observed	Mr(expt)	Mr(calc)	ppm	Miss	Score	#VALUE!	Rank	Query
	K.LLHAGFK.G	U	1		393.2390	784.4635	784.4595	5.00	0	18	30761.1	1	236
	K.IYIHPR.Y	U	1		399.7361	797.4577	797.4548	3.61	0	41	70067	1	353
	R.VTVEVIPR.S	U	2		456.7817	911.5489	911.5440	5.32	0	43	73484.9	1	978
	R.VTGWGNRR.E	U	1		473.2562	944.4978	944.4940	3.94	1	19	32470.1	1	1142
	R.SGIECQLWR.S	U	2		574.7838	1147.5529	1147.5444	7.43	0	38	64940.2	1	2988
	R.CLAWSSEQAK.A	U	1		590.2811	1178.5477	1178.5390	7.40	0	44	75193.9	1	3377
	K.ENLDRDIALLK.L	U	1		433.9164	1298.7273	1298.7194	6.11	1	12	20507.4	1	4870
	R.EECSVPVCGQDR.V	U	1		718.3033	1434.5920	1434.5868	3.65	0	21	35888	1	6527
	R.LGEDPDPDAAIEGR.T	U	3		727.8464	1453.6783	1453.6685	6.77	0	85	145261	1	6751
	R.REECSVPVCGQDR.V	U	1		531.2389	1590.6948	1590.6879	4.38	1	16	27343.2	1	8251
	R.TSEDHFQPFFNEK.T	U	3		542.5824	1624.7254	1624.7158	5.90	0	(31)	-52977.5	1	8614
	R.TSEDHFQPFFNEK.T	U	3		813.3707	1624.7269	1624.7158	6.84	0	55	93992.4	1	8616
	K.SPQELLCGASLISDR.W	U	2		823.4191	1644.8236	1644.8141	5.77	0	64	109373	1	8834
	R.KSPQELLCGASLISDR.W	U	1		591.9808	1772.9207	1772.9091	6.55	1	(40)	-68358.1	1	9807
	R.KSPQELLCGASLISDR.W	U	1		887.4677	1772.9209	1772.9091	6.66	1	41	70067	1	9808
	R.ITDNMFCAGYKPGEGK.R	U	2		894.4138	1786.8130	1786.8018	6.23	0	34	58104.4	1	9894
	K.TFGAGEADCGLRPLFEK.K	U	3		934.4589	1866.9032	1866.8934	5.21	0	91	155515	1	10486
	K.TFGAGEADCGLRPLFEK.K	U	2		623.3090	1866.9052	1866.8934	6.32	0	(42)	-71776	1	10488
	R.YNWKENLDRDIALLK.L	U	1		631.0109	1890.0108	1889.9999	5.75	2	17	29052.2	1	10672
	K.DQDFNPAVPLAENFCR.N	U	1		946.9380	1891.8614	1891.8523	4.83	0	16	27343.2	1	10678
	R.SGGSTTSQSPLLETCVPDR.G	U	3		996.4761	1990.9376	1990.9266	5.52	0	118	201656	1	11506
	R.SGGSTTSQSPLLETCVPDR.G	U	2		664.6543	1990.9411	1990.9266	7.27	0	(37)	-63231.2	1	11509
	K.TFGAGEADCGLRPLFEKK.Q	U	1		499.7588	1995.0061	1994.9884	8.86	1	4	6835.81	1	11546
	R.NPDGSITGPWCYTTSPTLR.R	U	1		708.3370	2121.9891	2121.9790	4.78	0	(18)	-30761.1	1	12456
	R.NPDGSITGPWCYTTSPTLR.R	U	2		1062.0032	2121.9918	2121.9790	6.04	0	80	136716	1	12457
	K->.<-QVQDQTEKELFESYIEGR.I	U	1	Gln->pyro-Glu (N-term Q)	728.0178	2181.0316	2181.0226	4.15	1	(21)	-35888	1	12802
	K->.<-QVQDQTEKELFESYIEGR.I	U	1	Gln->pyro-Glu (N-term Q)	1091.5258	2181.0370	2181.0226	6.60	1	(7)	-11962.7	1	12804
	K.QVQDQTEKELFESYIEGR.I	U	1		733.6948	2198.0625	2198.0491	6.07	1	61	104246	1	12890
	R.SGGSTTSQSPLLETCVPDRGR.E	U	2		735.6943	2204.0612	2204.0492	5.45	1	23	39305.9	1	12933
	R.IVEGQDAEVGLSPWQVMLFR.K	U	1		1137.5920	2273.1695	2273.1514	7.96	0	81	138425	1	13422
	R.IVEGQDAEVGLSPWQVMLFR.K	U	1		758.7310	2273.1712	2273.1514	8.71	0	(57)	-97410.3	1	13423
	R.IVEGQDAEVGLSPWQV->M<-LFR.K	U	1	Oxidation (M)	1145.5894	2289.1642	2289.1464	7.78	0	(2)	-3417.9	1	13594
	R.IVEGQDAEVGLSPWQV->M<-LFR.K	U	1	Oxidation (M)	764.0620	2289.1642	2289.1464	7.79	0	(27)	-46141.7	1	13595
	K.KQVQDQTEKELFESYIEGR.I	U	1		776.3908	2326.1506	2326.1441	2.81	2	(6)	-10253.7	1	13847
	K.KQVQDQTEKELFESYIEGR.I	U	1		582.5465	2326.1567	2326.1441	5.43	2	17	29052.2	1	13848
	R.EKLNECLEGNCAEGVGMNYR.G	U	2		781.6795	2342.0167	2342.0089	3.31	1	14	23925.3	1	13949
A5D7R6	ITIH2 protein OS=Bos taurus GN=ITIH2 PE=2 SV=1	106576	845	54(34)	23(18)	0.89	23%	A5D7R6_uniprot		0.000506681	0.865893	-0.304	7.93
	Peptide	Unique	Matches	Modification	Observed	Mr(expt)	Mr(calc)	ppm	Miss	Score	#VALUE!	Rank	Query
	R.LHLKPGR.L	U	1		410.7633	819.5120	819.5079	5.03	0	29	49559.6	1	467
	K.TILDDLR.T	U	2		423.2427	844.4709	844.4654	6.52	0	37	63231.2	1	612
	K.HLEVDVR.I	U	2		434.2406	866.4666	866.4610	6.50	0	47	80320.7	1	716
	R.IIEPQGLR.S	U	2		463.2799	924.5452	924.5392	6.45	0	31	52977.5	1	1022
	R.VANTVIQTK.V	U	3		487.2891	972.5636	972.5604	3.26	0	65	111082	1	1321
	R.KLGSYEHR.L	U	2		495.2643	988.5140	988.5090	5.06	1	44	75193.9	1	1451
	K.HADPDFTKK.L	U	1		529.7701	1057.5256	1057.5193	6.01	1	10	17089.5	1	2059
	R.SLAPTAA->M<-KR.K	U	1	Oxidation (M)	531.3000	1060.5854	1060.5699	14.7	1	3	5126.86	4	2093
	K.DKHADPDFTK.K	U	1		587.2840	1172.5534	1172.5462	6.18	1	17	29052.2	1	3315
	R.TWRNDLVSATK.T	U	2		645.8475	1289.6804	1289.6728	5.89	1	50	85447.6	1	4781
	K.DKHADPDFTKK.L	U	1		434.5565	1300.6477	1300.6412	5.05	2	9	15380.6	1	4905
	K.FYNQVSTPLLR.N	U	2		669.3683	1336.7221	1336.7139	6.15	0	67	114500	1	5360
	R.IYGNQDTSVQLK.K	U	2		683.3587	1364.7028	1364.6936	6.79	0	69	117918	1	5717
	K.VQFELHYQEVK.W	U	2		473.9168	1418.7285	1418.7194	6.42	0	(38)	-64940.2	1	6321
	K.VQFELHYQEVK.W	U	3		710.3721	1418.7296	1418.7194	7.18	0	62	105955	1	6322
	R.IYGNQDTSVQLKK.F	U	2		498.6060	1492.7963	1492.7885	5.21	1	50	85447.6	1	7266
	R.TEDVDQVTVYSYK.V	U	2		773.8723	1545.7299	1545.7199	6.51	0	58	99119.2	1	7755
	K.IQPSGGTNINEALLR.A	U	2		791.9350	1581.8554	1581.8474	5.06	0	78	133298	1	8171
	K.IQPSGGTNINEALLR.A	U	1		528.2935	1581.8587	1581.8474	7.14	0	(8)	-13671.6	1	8173
	R.TEDHFSVVDFNHNVR.T	U	1		605.9554	1814.8445	1814.8336	5.98	0	34	58104.4	1	10112
	R.ALDMEDFKTEVSIAPGAK.V	U	2		641.3273	1920.9602	1920.9503	5.16	1	(54)	-92283.4	1	10938
	R.ALDMEDFKTEVSIAPGAK.V	U	2		961.4946	1920.9746	1920.9503	12.7	1	73	124753	1	10941
	K.VVNHSPQPQNVVFDVQIPK.G	U	1		1073.0801	2144.1456	2144.1379	3.61	0	(2)	-3417.9	1	12623
	K.VVNHSPQPQNVVFDVQIPK.G	U	3		715.7240	2144.1502	2144.1379	5.74	0	44	75193.9	1	12626
	R.SLHVLDTFDGHFDGVPVVSK.G	U	4		543.0328	2168.1020	2168.0903	5.42	0	29	49559.6	1	12749
	R.SLHVLDTFDGHFDGVPVVSK.G	U	2		723.7083	2168.1031	2168.0903	5.92	0	(27)	-46141.7	1	12752
	R.SISGESGERTEDVDQVTVYSYK.V	U	2		817.0540	2448.1402	2448.1292	4.49	1	23	39305.9	1	14472
	K.TILDDLRTEDHFSVVDFNHNVR.T	U	2		529.2682	2641.3049	2641.2885	6.20	1	(5)	-8544.76	1	15483
	K.TILDDLRTEDHFSVVDFNHNVR.T	U	1		661.3343	2641.3083	2641.2885	7.50	1	30	51268.6	1	15485
	Peptide	Unique	Matches	Modification	Observed	Mr(expt)	Mr(calc)	ppm	Miss	Score	#VALUE!	Rank	Query
	K.KLSKYHEK.K	U	1		516.7924	1031.5702	1031.5763	-5.98	2	5	8544.76	2	1853
	K.AMGVEDFISR.V	U	3		562.7787	1123.5429	1123.5332	8.69	0	49	83738.6	1	2718
	K.A->M<-GVEDFISR.V	U	1	Oxidation (M)	570.7760	1139.5374	1139.5281	8.20	0	(1)	-1708.95	1	2905
	K.YLMEFNACR.C	U	1		602.2723	1202.5300	1202.5212	7.30	0	38	64940.2	1	3687
	K.YHFEAQADTK.I	U	1		605.2823	1208.5501	1208.5462	3.28	0	37	63231.2	1	3756
	K.YHFEAQADTK.I	U	1		403.8576	1208.5509	1208.5462	3.88	0	(26)	-44432.8	1	3757
	R.ELQYDPACER.L	U	2		640.7860	1279.5575	1279.5503	5.62	0	44	75193.9	1	4637
	K.METAGVTSAEIQK.C	U	1		682.8436	1363.6727	1363.6653	5.42	0	70	119627	1	5709
	R.LYYGDDDKYFR.K	U	2		727.8381	1453.6617	1453.6514	7.10	1	73	124753	1	6748
	R.LYYGDDDKYFR.K	U	2		485.5613	1453.6620	1453.6514	7.31	1	(68)	-116209	1	6749
	R.EKMETAGVTSAEIQK.C	U	1		811.4120	1620.8094	1620.8029	4.05	1	(13)	-22216.4	1	8574
	R.EKMETAGVTSAEIQK.C	U	1		541.2774	1620.8104	1620.8029	4.64	1	33	56395.4	1	8575
	K.ISSEIYNDANDLLTK.V	U	2		848.4305	1694.8464	1694.8363	5.99	0	90	153806	1	9267
	R.YYGGQCETVYNGEWR.E	U	1		941.3998	1880.7850	1880.7788	3.30	0	88	150388	1	10598
	R.ECNNPAPQNGGASCPGHR.V	U	1		641.6072	1921.7997	1921.7908	4.65	0	4	6835.81	1	10955
	R.ILENDCSQYDPIPGSEK.A	U	2		982.9559	1963.8973	1963.8833	7.13	0	7	11962.7	1	11297
	R.GGSSGWGGSLTQDSSLVTYR.S	U	1		1007.9822	2013.9499	2013.9392	5.31	0	62	105955	1	11680
	R.ENIVLDEGMLQSLMELPER.Y	U	1		1108.5577	2215.1009	2215.0864	6.55	0	117	199947	1	12987
	R.ENIVLDEGMLQSLMELPER.Y	U	1		739.3760	2215.1063	2215.0864	8.98	0	(55)	-93992.4	1	12988
	K.AALGYNILTQEEAQHVYDAR.Y	U	2		754.7141	2261.1203	2261.1076	5.62	0	90	153806	1	13345
	K.AALGYNILTQEEAQHVYDAR.Y	U	1		1131.5692	2261.1239	2261.1076	7.19	0	(53)	-90574.5	1	13346
	K.SGDGKLTENEKAMGVEDFISR.V	U	1		761.7069	2282.0989	2282.0849	6.16	2	5	8544.76	1	13492
	R.RENIVLDEGMLQSLMELPER.Y	U	1		791.4109	2371.2110	2371.1875	9.91	1	51	87156.6	1	14079
Q2HJF0	Serotransferrin-like OS=Bos taurus GN=LOC525947 PE=2 SV=1	70849	783	40(30)	22(18)	1.59	36%	Q2HJF0_uniprot		0.000564581	0.964842	-0.27	8.21
	Peptide	Unique	Matches	Modification	Observed	Mr(expt)	Mr(calc)	ppm	Miss	Score	#VALUE!	Rank	Query
	K.GDVAFVK.H		3		368.2075	734.4004	734.3963	5.54	0	29	49559.6	1	85
	R.RPVHEYK.G		1		464.7547	927.4949	927.4926	2.46	0	14	23925.3	1	1036
	R.LCQLCAGK.G		2		475.2356	948.4566	948.4521	4.73	0	52	88865.5	1	1181
	R.IPSHAVVAR.S		1		475.2841	948.5536	948.5505	3.31	0	45	76902.8	1	1182
	R.TSYLDCIR.A		2		514.2500	1026.4854	1026.4804	4.90	0	53	90574.5	1	1792
	K.HPTVLQNTDGK.N		1		605.3166	1208.6187	1208.6150	3.13	0	57	97410.3	1	3770
	R.EPYFGYSGAFK.C		2		633.3007	1264.5869	1264.5764	8.27	0	40	68358.1	1	4452
	R.WCTVSNLEASK.C		2		647.8116	1293.6086	1293.6023	4.86	0	42	71776	1	4811
	K.GSNFQLNQLQGK.K		1		667.3493	1332.6840	1332.6786	4.09	0	45	76902.8	1	5336
	R.CLVEKGDVAFVK.H		1		682.8679	1363.7213	1363.7170	3.16	1	(23)	-39305.9	1	5712
	R.CLVEKGDVAFVK.H		2		455.5821	1363.7245	1363.7170	5.54	1	49	83738.6	1	5714
	R.MLFNQQELFGR.N		3		691.8529	1381.6913	1381.6812	7.25	0	74	126462	1	5865
	K.VLSVEGPHVTCVK.R	U	1		712.8873	1423.7600	1423.7494	7.47	0	3	5126.86	1	6387
	K.CLQDGVGDVSFVR.H		2		726.3546	1450.6947	1450.6875	4.94	0	78	133298	1	6718
	K.KGSNFQLNQLQGK.K		1		731.3983	1460.7821	1460.7736	5.84	1	19	32470.1	1	6845
	K.DLLFTDSAIGFLR.V	U	1		734.3996	1466.7846	1466.7769	5.26	0	79	135007	1	6924
	R.MLLPSDWSQEAAAK.F	U	2		773.8874	1545.7602	1545.7497	6.81	0	75	128171	1	7758
	K.YLGPEYLQAIANVK.H		2		789.9342	1577.8538	1577.8453	5.41	0	61	104246	1	8105
	K.DDPQTHHYVVAVVK.K		1		804.4144	1606.8143	1606.8104	2.45	0	6	10253.7	1	8450
	K.NLKPEDFQLLCLDGSR.K		2		635.6592	1903.9559	1903.9462	5.10	0	42	71776	1	10803
	K.NLKPEDFQLLCLDGSR.K		2		952.9875	1903.9604	1903.9462	7.48	0	(26)	-44432.8	1	10805
	K.HPTVLQNTDGKNPEAWAK.N		1		669.3448	2005.0125	2005.0017	5.40	1	41	70067	1	11605
	K.DLLFSDDTECLANLQDR.T		1		675.6506	2023.9299	2023.9157	7.02	0	(45)	-76902.8	1	11778
	K.DLLFSDDTECLANLQDR.T		2		1012.9724	2023.9301	2023.9157	7.15	0	117	199947	1	11779
	K.SPAKDLLFSDDTECLANLQDR.T		1		803.3893	2407.1462	2407.1325	5.67	1	34	58104.4	1	14289
Q0VCM5	Inter-alpha-trypsin inhibitor heavy chain H1 OS=Bos taurus GN=ITIH1 PE=2 SV=1	101686	752	41(30)	21(17)	0.88	24%	Q0VCM5_uniprot		0.000403202	0.689053	-0.278	6.98
F1MMP5	Inter-alpha-trypsin inhibitor heavy chain H1 OS=Bos taurus GN=ITIH1 PE=4 SV=1	101687	752	41(30)	21(17)		24%	F1MMP5_uniprot			0
	Peptide	Unique	Matches	Modification	Observed	Mr(expt)	Mr(calc)	ppm	Miss	Score	#VALUE!	Rank	Query
	R.GIEILNK.A	U	2		393.7418	785.4690	785.4647	5.46	0	30	51268.6	1	243
	K.DKVTAWK.Q	U	1		424.2395	846.4644	846.4599	5.25	1	21	35888	1	636
	R.DVELLYPR.E	U	2		502.7771	1003.5397	1003.5338	5.86	0	45	76902.8	1	1587
	K.ELAAQLIKK.S	U	1		507.3243	1012.6339	1012.6280	5.84	1	12	20507.4	1	1653
	R.LTYEEVLR.R	U	2		511.7832	1021.5518	1021.5444	7.24	0	41	70067	1	1747
	K.LDVEASFLPK.E	U	2		559.8125	1117.6104	1117.6019	7.64	0	50	85447.6	1	2634
	K.LMQYDIVIK.V	U	1		561.8198	1121.6251	1121.6154	8.59	0	26	44432.8	1	2691
	R.EAVSDLTQHR.H	U	2		578.2936	1154.5727	1154.5680	4.10	0	49	83738.6	1	3040
	R.EAVSDLTQHR.H	U	1		385.8651	1154.5735	1154.5680	4.77	0	(47)	-80320.7	1	3041
	K.AAISGENAGLVR.A	U	1		579.3199	1156.6253	1156.6200	4.62	0	61	104246	1	3083
	K.EVSFNVEIPK.T	U	2		581.3142	1160.6137	1160.6077	5.19	0	50	85447.6	1	3133
	R.LTYEEVLRR.K	U	1		393.5575	1177.6508	1177.6455	4.47	1	13	22216.4	1	3375
	R.GHMLENHVER.L	U	1		407.8661	1220.5764	1220.5720	3.62	0	34	58104.4	1	3905
	R.GH->M<-LENHVER.L	U	1	Oxidation (M)	413.1983	1236.5730	1236.5669	4.89	0	(9)	-15380.6	1	4077
	R.KLDVEASFLPK.E	U	3		623.8583	1245.7021	1245.6969	4.22	1	51	87156.6	1	4202
	R.KLDVEASFLPK.E	U	1		416.2413	1245.7022	1245.6969	4.25	1	(12)	-20507.4	1	4203
	R.KAAISGENAGLVR.A	U	1		643.3681	1284.7216	1284.7150	5.20	1	77	131589	1	4698
	R.MAVDAAVDGVVIR.S	U	3		658.3608	1314.7070	1314.6966	7.93	0	65	111082	1	5122
	R.->M<-AVDAAVDGVVIR.S	U	1	Oxidation (M)	666.3572	1330.6998	1330.6915	6.24	0	(56)	-95701.3	1	5331
	K.GSLVQASPANLEAAR.N	U	2		742.4017	1482.7889	1482.7790	6.67	0	79	135007	1	7176
	K.QYYEGSEIMVAGR.I	U	2		751.8554	1501.6963	1501.6871	6.10	0	69	117918	1	7373
	R->.<-QDFLGFYVLDSHR.M	U	1	Gln->pyro-Glu (N-term Q)	790.3833	1578.7520	1578.7467	3.38	0	2	3417.9	1	8109
	R.FAHYIITSQVVNSADTAK.E	U	1		655.6790	1964.0152	1964.0003	7.58	0	(31)	-52977.5	1	11302
	R.FAHYIITSQVVNSADTAK.E	U	2		983.0160	1964.0175	1964.0003	8.76	0	41	70067	1	11303
	K.TAFISDFAITADENAFTGDIKDK.V	U	1		830.7447	2489.2124	2489.1962	6.52	1	81	138425	1	14689
	R.GMTDQDGLEPIIDKPLDDYLPLEMVGPR.K	U	1		1043.1930	3126.5571	3126.5253	10.2	0	62	105955	1	16710
	R.GMTDQDGLEPIIDKPLDDYLPLE->M<-VGPR.K	U	1	Oxidation (M)	1048.5194	3142.5364	3142.5202	5.14	0	(5)	-8544.76	1	16784
	R.G->M<-TDQDGLEPIIDKPLDDYLPLEMVGPR.K	U	1	Oxidation (M)	1048.5251	3142.5536	3142.5202	10.6	0	(18)	-30761.1	1	16785
Q3MHN2	Complement component C9 OS=Bos taurus GN=C9 PE=2 SV=1	63327	740	42(35)	19(18)	2.20	33%	Q3MHN2_uniprot		0.000663224	1.13342	-0.487	5.66
	Peptide	Unique	Matches	Modification	Observed	Mr(expt)	Mr(calc)	ppm	Miss	Score	#VALUE!	Rank	Query
	K.YATELKEK.L	U	1		491.2686	980.5227	980.5178	5.02	1	49	83738.6	1	1376
	R.VVEESELAR.T	U	1		516.2737	1030.5329	1030.5295	3.36	0	51	87156.6	1	1830
	K.YTPVEAIEK.N	U	3		525.2825	1048.5504	1048.5441	6.04	0	39	66649.1	1	1964
	R.KYATELKEK.L	U	1		555.3172	1108.6198	1108.6128	6.38	2	57	97410.3	1	2531
	R.QGTPLPIDCR.M	U	1		578.7960	1155.5774	1155.5706	5.82	0	19	32470.1	1	3049
	K.SMEQKDIELR.D	U	1		416.8823	1247.6250	1247.6180	5.61	1	31	52977.5	1	4222
	K.VGVEVTGNFDSK.L	U	3		626.3186	1250.6226	1250.6143	6.67	0	34	58104.4	1	4280
	R.SIEIFGQFNGR.K	U	1		634.3303	1266.6461	1266.6357	8.22	0	40	68358.1	1	4478
	K.LVPIYDLIPVK.M	U	1		635.3978	1268.7810	1268.7744	5.19	0	42	71776	1	4524
	R.NRVVEESELAR.T	U	1		434.5677	1300.6814	1300.6735	6.10	1	52	88865.5	1	4910
	R.NRVVEESELAR.T	U	2		651.3485	1300.6825	1300.6735	6.90	1	(50)	-85447.6	1	4912
	R.FTYSKDDIYR.L	U	1		654.3211	1306.6277	1306.6194	6.36	1	32	54686.5	1	5027
	R.VWDGNTLTYYR.R	U	3		694.3402	1386.6659	1386.6568	6.53	0	61	104246	1	5926
	R.AIEDYINEFSVR.K	U	2		728.3632	1454.7118	1454.7041	5.25	0	69	117918	1	6765
	R.AIEDYINEFSVR.K	U	1		485.9117	1454.7132	1454.7041	6.24	0	(32)	-54686.5	1	6766
	R.TENHEESIQILR.T	U	3		490.2542	1467.7408	1467.7317	6.18	0	(52)	-88865.5	1	6931
	R.TENHEESIQILR.T	U	3		734.8800	1467.7454	1467.7317	9.34	0	67	114500	1	6935
	R.RPWNVASLTYDTK.A	U	3		775.9059	1549.7973	1549.7889	5.45	0	61	104246	1	7818
	R.AIEDYINEFSVRK.C	U	2		792.4121	1582.8095	1582.7991	6.61	1	66	112791	1	8181
	R.AIEDYINEFSVRK.C	U	2		528.6112	1582.8118	1582.7991	8.03	1	(44)	-75193.9	1	8183
	K.CVDLEHSDKGSTSSPSK.L	U	1		917.4200	1832.8255	1832.8211	2.44	1	(0)	0	1	10196
	K.CVDLEHSDKGSTSSPSK.L	U	1		459.2147	1832.8295	1832.8211	4.62	1	32	54686.5	1	10197
	K.GMGQTETNPEADLFDDVITFIR.G	U	1		823.7330	2468.1773	2468.1530	9.84	0	36	61522.3	1	14572
	K.KGMGQTETNPEADLFDDVITFIR.G	U	2		866.4317	2596.2733	2596.2479	9.76	1	(34)	-58104.4	1	15223
	K.KG->M<-GQTETNPEADLFDDVITFIR.G	U	1	Oxidation (M)	871.7639	2612.2699	2612.2428	10.4	1	42	71776	1	15312
	Peptide	Unique	Matches	Modification	Observed	Mr(expt)	Mr(calc)	ppm	Miss	Score	#VALUE!	Rank	Query
	K.GDVAFVK.H		3		368.2075	734.4004	734.3963	5.54	0	29	49559.6	1	85
	R.RPVHEYK.G		1		464.7547	927.4949	927.4926	2.46	0	14	23925.3	1	1036
	K.LCQLCAGK.G		2		475.2356	948.4566	948.4521	4.73	0	52	88865.5	1	1181
	R.IPSHAVVAR.S		1		475.2841	948.5536	948.5505	3.31	0	45	76902.8	1	1182
	R.TSYLDCIR.A		2		514.2500	1026.4854	1026.4804	4.90	0	53	90574.5	1	1792
	R.MLLPSDWSQK.A	U	2		602.8101	1203.6057	1203.5958	8.23	0	57	97410.3	1	3706
	K.HPTVLQNTDGK.N		1		605.3166	1208.6187	1208.6150	3.13	0	57	97410.3	1	3770
	R.WCTVSNLEASK.C		2		647.8116	1293.6086	1293.6023	4.86	0	42	71776	1	4811
	K.GSNFQLNQLQGK.K		1		667.3493	1332.6840	1332.6786	4.09	0	45	76902.8	1	5336
	R.CLVEKGDVAFVK.H		1		682.8679	1363.7213	1363.7170	3.16	1	(23)	-39305.9	1	5712
	R.CLVEKGDVAFVK.H		2		455.5821	1363.7245	1363.7170	5.54	1	49	83738.6	1	5714
	R.MLFNQQELFGR.N		3		691.8529	1381.6913	1381.6812	7.25	0	74	126462	1	5865
	K.CLQDGVGDVSFVR.H		2		726.3546	1450.6947	1450.6875	4.94	0	78	133298	1	6718
	K.DLLFTDAAIGFLR.V	U	1		726.4064	1450.7982	1450.7820	11.1	0	42	71776	1	6726
	K.VLSVESPHVTCVK.R	U	1		485.5977	1453.7713	1453.7599	7.85	0	21	35888	1	6756
	K.KGSNFQLNQLQGK.K		1		731.3983	1460.7821	1460.7736	5.84	1	19	32470.1	1	6845
	K.YLGPEYLQAIANVK.H		2		789.9342	1577.8538	1577.8453	5.41	0	61	104246	1	8105
	K.DDPQTHHYVVAVVK.K		1		804.4144	1606.8143	1606.8104	2.45	0	6	10253.7	1	8450
	K.NLKPEDFQLLCLDGSR.K		2		635.6592	1903.9559	1903.9462	5.10	0	42	71776	1	10803
	K.NLKPEDFQLLCLDGSR.K		2		952.9875	1903.9604	1903.9462	7.48	0	(26)	-44432.8	1	10805
	K.HPTVLQNTDGKNPEAWAK.N		1		669.3448	2005.0125	2005.0017	5.40	1	41	70067	1	11605
	K.DLLFSDDTECLANLQDR.T		1		675.6506	2023.9299	2023.9157	7.02	0	(45)	-76902.8	1	11778
	K.DLLFSDDTECLANLQDR.T		2		1012.9724	2023.9301	2023.9157	7.15	0	117	199947	1	11779
	K.SPAKDLLFSDDTECLANLQDR.T		1		803.3893	2407.1462	2407.1325	5.67	1	34	58104.4	1	14289
	Peptide	Unique	Matches	Modification	Observed	Mr(expt)	Mr(calc)	ppm	Miss	Score	#VALUE!	Rank	Query
[truncated: 363 more rows]

## Sheet: NaBH4-RGO
Accession	Description	Mass	Score	Matches	Sequences	emPAI	Coverage			SpCi*	NpSpC*	GRAVY**	PI***
Q2UVX4	Complement C3 OS=Bos taurus GN=C3 PE=1 SV=2	188675	4716	333(203)	86(71)	4.65	47%	Q2UVX4_uniprot		0.00176494	7.66773	-0.349	6.41
G3X7A5	Complement C3 OS=Bos taurus GN=C3 PE=4 SV=1	188568	4716	333(203)	86(71)		47%	G3X7A5_uniprot			0
	Peptide	Unique	Matches	Modification	Observed	Mr(expt)	Mr(calc)	ppm	Miss	Score	#VALUE!	Rank	Query
	R.EALKLK.E	U	1		351.2333	700.4520	700.4483	5.31	1	19	82544.9	1	13
	K.FGLEKR.Q	U	1		375.2209	748.4272	748.4232	5.36	1	27	117301	1	96
	K.GVFVLNK.K	U	3		388.7398	775.4651	775.4592	7.61	0	36	156401	1	195
	K.ISYIIGK.D	U	4		397.2473	792.4801	792.4745	7.08	0	49	212879	1	321
	R.VGLVAVDK.G	U	3		400.7494	799.4842	799.4804	4.76	0	54	234601	1	360
	K.WLILEK.Q	U	4		401.2492	800.4838	800.4796	5.26	0	33	143367	1	370
	R.LPYSVVR.N	U	3		417.2501	832.4856	832.4807	5.94	0	34	147712	1	513
	R.SVQLMEK.R	U	2		417.7253	833.4361	833.4317	5.28	0	28	121645	1	517
	R.DGALELAR.S	U	3		422.7320	843.4495	843.4450	5.34	0	44	191157	1	561
	R.WLNEQR.Y	U	4		423.2194	844.4243	844.4191	6.11	0	37	160745	1	656
	R.VFTVDHK.L	U	1		423.2323	844.4500	844.4443	6.78	0	53	230257	1	657
	K.DLCETVK.W	U	1		432.7130	863.4115	863.4059	6.48	0	15	65167	1	757
	K.LMNVFLK.D	U	1		432.7560	863.4975	863.4939	4.15	0	(16)	-69511.5	1	761
	R.KFISHIK.C	U	1		436.7742	871.5338	871.5280	6.69	1	11	47789.2	1	809
	K.L->M<-NVFLK.D	U	1	Oxidation (M)	440.7544	879.4942	879.4888	6.10	0	29	125990	1	856
	K.GVFVLNKK.N	U	3		452.7869	903.5592	903.5542	5.60	1	34	147712	1	935
	R.AILYNYR.E	U	3		456.7539	911.4931	911.4865	7.33	0	26	112956	1	996
	R.DPLTITVR.T	U	4		457.7718	913.5290	913.5233	6.22	0	46	199846	1	1011
	K.LSINTQNK.R	U	2		459.2593	916.5040	916.4978	6.80	0	46	199846	1	1019
	K.LEGDRLTK.F	U	1		466.2669	930.5192	930.5134	6.21	1	22	95578.3	1	1043
	R->.<-QESLELIR.K	U	2	Gln->pyro-Glu (N-term Q)	485.7664	969.5182	969.5131	5.30	0	(45)	-195501	1	1289
	R.QESLELIR.K	U	4		494.2801	986.5457	986.5396	6.20	0	53	230257	1	1395
	R.SVQLMEKR.M	U	1		495.7765	989.5384	989.5328	5.65	1	28	121645	1	1418
	K.AGQYSSDLR.K	U	1		498.7443	995.4741	995.4672	6.91	0	47	204190	1	1448
	R.KIWDVVEK.A	U	4		508.7966	1015.5786	1015.5702	8.24	1	55	238946	1	1567
	K.IGLHEVEVK.A	U	2		512.2989	1022.5832	1022.5760	7.03	0	39	169434	1	1618
	R.ISLTHSLTR.V	U	2		514.3012	1026.5877	1026.5822	5.42	0	51	221568	1	1657
	K.LSINTQNKR.D	U	1		358.5417	1072.6032	1072.5989	3.99	1	(28)	-121645	1	1916
	K.LSINTQNKR.D	U	1		537.3096	1072.6046	1072.5989	5.32	1	46	199846	1	1917
	K.GYTQQLAFR.Q	U	3		542.2851	1082.5556	1082.5509	4.40	0	59	256324	1	1953
	K.LCHKDTCR.C	U	1		363.8374	1088.4905	1088.4855	4.53	1	34	147712	1	2018
	K.LCHKDTCR.C	U	1		545.2526	1088.4906	1088.4855	4.62	1	(23)	-99922.8	1	2019
	K.ADIGCTPGSGR.N	U	1		545.7546	1089.4947	1089.4873	6.80	0	51	221568	1	2033
	K.NTLIIYLDK.V	U	2		546.8216	1091.6286	1091.6226	5.49	0	36	156401	1	2052
	K.DSCMGTLVVK.N	U	2		555.2736	1108.5327	1108.5257	6.32	0	33	143367	1	2176
	R.QESLELIRK.G	U	2		558.3271	1114.6396	1114.6346	4.53	1	46	199846	1	2243
	K.AGQYSSDLRK.C	U	1		375.5301	1123.5684	1123.5622	5.59	1	(25)	-108612	1	2348
	K.AGQYSSDLRK.C	U	1		562.7916	1123.5687	1123.5622	5.82	1	44	191157	1	2349
	K.GSMILDICTK.Y	U	6		569.2894	1136.5643	1136.5570	6.46	0	(37)	-160745	1	2472
	K.RQESLELIR.K	U	4		381.8903	1142.6491	1142.6407	7.35	1	(37)	-160745	1	2544
	K.RQESLELIR.K	U	3		572.3321	1142.6496	1142.6407	7.79	1	53	230257	1	2547
	K.TSQGLETQQR.A	U	1		574.2922	1146.5698	1146.5629	6.01	0	41	178123	1	2555
	K.GS->M<-ILDICTK.Y	U	1	Oxidation (M)	577.2864	1152.5583	1152.5519	5.59	0	39	169434	1	2571
	R.TKKDNIPEGR.Q	U	2		579.3199	1156.6253	1156.6200	4.62	2	45	195501	1	2605
	R.TKKDNIPEGR.Q	U	3		386.5493	1156.6261	1156.6200	5.29	2	(32)	-139023	1	2606
	K.DYDTTPPVVR.W	U	2		581.7938	1161.5731	1161.5666	5.57	0	39	169434	1	2651
	R.HQQTITIPAR.S	U	1		388.8898	1163.6477	1163.6411	5.64	0	(27)	-117301	1	2685
	R.HQQTITIPAR.S	U	3		582.8314	1163.6483	1163.6411	6.18	0	62	269357	1	2686
	R->.<-QVLLNGVQPSR.A	U	2	Gln->pyro-Glu (N-term Q)	597.3388	1192.6631	1192.6564	5.56	0	(48)	-208535	1	3024
	R.VSIRPAPETVK.K	U	2		598.8549	1195.6952	1195.6925	2.27	0	40	173779	1	3061
	R.VSIRPAPETVK.K	U	2		399.5734	1195.6985	1195.6925	5.02	0	(22)	-95578.3	1	3063
	K.NRWEEPNQK.L	U	1		400.8649	1199.5730	1199.5683	3.89	1	(25)	-108612	1	3091
	K.NRWEEPNQK.L	U	2		600.7940	1199.5733	1199.5683	4.21	1	37	160745	1	3092
	R.YISKYEMNR.D	U	2		602.2962	1202.5778	1202.5753	2.08	1	(21)	-91233.8	1	3146
	R.YISKYEMNR.D	U	1		401.8671	1202.5795	1202.5753	3.43	1	24	104267	1	3147
	R.QVLLNGVQPSR.A	U	4		605.8532	1209.6917	1209.6830	7.26	0	59	256324	1	3236
	K.EVTLEDRLDK.A	U	1		609.3248	1216.6350	1216.6299	4.17	1	22	95578.3	1	3282
	K.EVTLEDRLDK.A	U	2		406.5532	1216.6377	1216.6299	6.43	1	(10)	-43444.7	2	3284
	R.YISKYE->M<-NR.D	U	1	Oxidation (M)	407.1988	1218.5747	1218.5703	3.66	1	(20)	-86889.4	1	3287
	K.AGDFLENHYR.E	U	2		611.2887	1220.5628	1220.5574	4.45	0	69	299768	1	3289
	K.AGDFLENHYR.E	U	3		407.8623	1220.5650	1220.5574	6.20	0	(43)	-186812	1	3292
	K.RQESLELIRK.G	U	3		424.5889	1270.7450	1270.7357	7.30	2	34	147712	1	3832
	R.KDYDTTPPVVR.W	U	3		645.8412	1289.6679	1289.6616	4.94	1	56	243290	1	4019
	R.KDYDTTPPVVR.W	U	1		430.8968	1289.6687	1289.6616	5.54	1	(42)	-182468	1	4022
	K.ACEPGVDYVYK.T	U	3		650.8023	1299.5901	1299.5805	7.33	0	37	160745	1	4104
	R.VPINDGNGEAILK.R	U	3		670.3678	1338.7210	1338.7143	5.03	0	88	382313	1	4480
	K.FYYIDDPDGLK.V	U	6		673.3235	1344.6325	1344.6238	6.52	0	61	265013	1	4516
	R.EVVADSVWVDVK.D	U	43		673.3581	1344.7016	1344.6926	6.75	0	79	343213	1	4565
	K.DICEAQVNSLGR.S	U	2		681.3311	1360.6477	1360.6405	5.28	0	70	304113	1	4740
	K.SGSDEVQVKQER.K	U	1		454.5625	1360.6657	1360.6583	5.44	1	52	225912	1	4742
	K.SGSDEVQVKQER.K	U	1		681.3412	1360.6678	1360.6583	7.03	1	(48)	-208535	1	4743
	K.AAVYNHFISDGVK.K	U	2		474.2478	1419.7215	1419.7147	4.80	0	(43)	-186812	1	5237
	K.AAVYNHFISDGVK.K	U	2		710.8685	1419.7224	1419.7147	5.44	0	61	265013	1	5240
	K.VSHTVEDCLSFK.V	U	2		474.5643	1420.6710	1420.6657	3.73	0	47	204190	1	5252
	K.VSHTVEDCLSFK.V	U	2		711.3430	1420.6715	1420.6657	4.09	0	(46)	-199846	1	5254
	K.VFALAANLIAIDSK.D	U	1		723.4258	1444.8370	1444.8289	5.59	0	34	147712	1	5463
	K.GQGTLSVVTVYHAK.L	U	1		730.4027	1458.7909	1458.7831	5.33	0	18	78200.4	1	5596
	R.NYAGVFTDAGLTLK.T	U	16		735.3890	1468.7634	1468.7562	4.91	0	75	325835	1	5687
	R.NYAGVFTDAGLTLK.T	U	1		490.5953	1468.7640	1468.7562	5.32	0	(10)	-43444.7	1	5690
	R.QQHSRDGALELAR.S	U	2		494.2620	1479.7641	1479.7542	6.71	1	14	60822.6	1	5828
	R.VPINDGNGEAILKR.Q	U	3		748.4196	1494.8246	1494.8154	6.12	1	(82)	-356246	1	5936
	R.VPINDGNGEAILKR.Q	U	6		499.2828	1494.8267	1494.8154	7.54	1	86	373624	1	5940
	R.TLNPEHLGQGGVQR.E	U	2		753.3993	1504.7840	1504.7746	6.24	0	53	230257	1	6054
	R.TLNPEHLGQGGVQR.E	U	2		502.6023	1504.7850	1504.7746	6.91	0	(33)	-143367	1	6055
	R.DSNKNTLIIYLDK.V	U	2		512.9498	1535.8275	1535.8195	5.20	1	(30)	-130334	1	6216
	R.DSNKNTLIIYLDK.V	U	3		768.9210	1535.8275	1535.8195	5.21	1	90	391002	1	6217
	R.FYHPDKEDGMLSK.L	U	3		522.9170	1565.7291	1565.7184	6.85	1	40	173779	1	6489
	R.FYHPDKEDGMLSK.L	U	2		783.8719	1565.7293	1565.7184	6.98	1	(38)	-165090	1	6490
	R.SEETKENERFTVK.A	U	1		532.9369	1595.7888	1595.7791	6.12	2	7	30411.3	1	6794
	R.LDKACEPGVDYVYK.T	U	1		552.9390	1655.7953	1655.7865	5.29	1	30	130334	1	7253
	K.AFLDCCEYITQLR.Q	U	1		844.8960	1687.7774	1687.7698	4.53	0	37	160745	1	7419
	R.CAEENCFMHHTEK.E	U	1		564.8937	1691.6592	1691.6490	6.02	0	11	47789.2	1	7450
	K.VYSYYNLDETCIR.F	U	1		565.9308	1694.7707	1694.7610	5.74	0	(24)	-104267	1	7461
	K.VYSYYNLDETCIR.F	U	3		848.3928	1694.7710	1694.7610	5.88	0	74	321491	1	7462
	K.DSITTWEILAVSLSDK.K	U	2		889.4727	1776.9308	1776.9145	9.13	0	61	265013	1	7908
	R.SDLDDDIIPEEDIISR.S	U	3		615.6324	1843.8753	1843.8687	3.60	0	(45)	-195501	1	8159
	R.SDLDDDIIPEEDIISR.S	U	11		922.9461	1843.8777	1843.8687	4.86	0	81	351902	1	8168
	K.DSITTWEILAVSLSDKK.G	U	1		953.5173	1905.0201	1905.0095	5.57	1	76	330180	1	8516
	K.DSITTWEILAVSLSDKK.G	U	1		636.0140	1905.0201	1905.0095	5.58	1	(67)	-291079	1	8517
	K.EYVLPSFEVQLEPEEK.F	U	5		968.4874	1934.9602	1934.9513	4.60	0	59	256324	1	8708
	K.EYVLPSFEVQLEPEEK.F	U	2		645.9941	1934.9606	1934.9513	4.81	0	(19)	-82544.9	1	8710
	K.LEDDFDEYIMVIENIIK.S	U	1		700.3524	2098.0353	2098.0180	8.23	0	29	125990	1	9444
	K.AYYEDSPQQVFSAEFEVK.E	U	5		713.0002	2135.9787	2135.9688	4.66	0	(31)	-134679	1	9662
	K.AYYEDSPQQVFSAEFEVK.E	U	9		1068.9970	2135.9793	2135.9688	4.96	0	80	347558	1	9664
	K.ILLQGTPVAQMTEDAIDGER.L	U	2		719.7034	2156.0885	2156.0783	4.70	0	95	412725	1	9762
	K.ILLQGTPVAQMTEDAIDGER.L	U	2		1079.0529	2156.0912	2156.0783	5.96	0	(94)	-408380	1	9767
	R.EEVPAADLSDQVPDTESETK.I	U	4		1080.5008	2158.9871	2158.9754	5.46	0	84	364935	1	9779
	R.EEVPAADLSDQVPDTESETK.I	U	3		720.6699	2158.9879	2158.9754	5.82	0	(49)	-212879	1	9784
	K.ILLQGTPVAQ->M<-TEDAIDGER.L	U	3	Oxidation (M)	725.0353	2172.0842	2172.0732	5.04	0	(36)	-156401	1	9826
	K.ILLQGTPVAQ->M<-TEDAIDGER.L	U	2	Oxidation (M)	1087.0498	2172.0850	2172.0732	5.44	0	(23)	-99922.8	1	9827
	K.KLEDDFDEYIMVIENIIK.S	U	1		743.0518	2226.1336	2226.1129	9.29	1	6	26066.8	1	10046
	R.HIPVVTQGSNVQSLTQDDGVAK.L	U	3		765.0689	2292.1847	2292.1710	5.98	0	48	208535	1	10347
	R.HIPVVTQGSNVQSLTQDDGVAK.L	U	1		1147.0997	2292.1849	2292.1710	6.06	0	(17)	-73856	1	10348
	R.CAEENCFMHHTEKEVTLEDR.L	U	1		845.6962	2534.0667	2534.0624	1.68	1	(7)	-30411.3	1	11089
	K.DTWVELWPEAEECQDEENQK.Q	U	1		845.6971	2534.0694	2534.0543	5.95	0	1	4344.47	1	11092
	R.CAEENCFMHHTEKEVTLEDR.L	U	1		634.5261	2534.0754	2534.0624	5.11	1	44	191157	1	11093
	K.QVLSNENTQLNSNNGYLSTVTIK.I	U	2		846.4367	2536.2883	2536.2769	4.50	0	39	169434	1	11108
	R.FLYGEQVDGTAFVIFGVQDGDRR.I	U	2		863.7693	2588.2860	2588.2660	7.75	1	7	30411.3	1	11326
	K.QKPDGIFQEDGPVIHQEMIGGFR.D	U	2		650.3279	2597.2827	2597.2697	5.00	0	29	125990	1	11360
	K.QKPDGIFQEDGPVIHQEMIGGFR.D	U	2		866.7687	2597.2842	2597.2697	5.60	0	(17)	-73856	1	11361
	R.DGALELARSDLDDDIIPEEDIISR.S	U	1		890.7789	2669.3148	2669.3031	4.36	1	55	238946	1	11603
	R.DGALELARSDLDDDIIPEEDIISR.S	U	1		1335.6655	2669.3165	2669.3031	5.01	1	(2)	-8688.94	1	11604
	K.EYVLPSFEVQLEPEEKFYYIDDPDGLK.V	U	1		1088.2047	3261.5923	3261.5645	8.52	1	5	21722.3	1	12621
	R.TLNPEHLGQGGVQREEVPAADLSDQVPDTESETK.I	U	1		1216.2607	3645.7604	3645.7394	5.75	1	18	78200.4	1	13067
	R.TLNPEHLGQGGVQREEVPAADLSDQVPDTESETK.I	U	2		912.4477	3645.7617	3645.7394	6.09	1	(17)	-73856	1	13068
P02769	Serum albumin OS=Bos taurus GN=ALB PE=1 SV=4	71244	3874	239(146)	51(42)	18.54	69%	P02769_uniprot		0.00335467	14.5743	-0.429	5.82
	Peptide	Unique	Matches	Modification	Observed	Mr(expt)	Mr(calc)	ppm	Miss	Score	#VALUE!	Rank	Query
	K.GACLLPK.I		5		379.7174	757.4201	757.4156	5.96	0	36	156401	1	138
	K.LVTDLTK.V		5		395.2415	788.4685	788.4644	5.22	0	42	182468	1	233
	R.LSQKFPK.A		4		424.2570	846.4995	846.4963	3.74	1	40	173779	1	682
	R.LCVLHEK.T		3		449.7466	897.4786	897.4742	4.90	0	34	147712	1	897
	K.AEFVEVTK.L		3		461.7509	921.4872	921.4807	7.04	0	32	139023	1	1028
	K.YLYEIAR.R		4		464.2523	926.4901	926.4861	4.27	0	36	156401	1	1032
	K.DLGEEHFK.G		2		487.7353	973.4560	973.4505	5.62	0	35	152056	1	1306
	K->.<-QTALVELLK.H		2	Gln->pyro-Glu (N-term Q)	499.3034	996.5923	996.5855	6.81	0	(36)	-156401	1	1459
	K.LVVSTQTALA.-		10		501.7992	1001.5839	1001.5757	8.16	0	20	86889.4	1	1498
	K.QTALVELLK.H		4		507.8168	1013.6191	1013.6121	6.94	0	60	260668	1	1543
	K.SHCIAEVEK.D		1		358.1762	1071.5067	1071.5019	4.51	0	(25)	-108612	1	1911
	K.SHCIAEVEK.D		1		536.7613	1071.5080	1071.5019	5.74	0	33	143367	1	1912
	K.YLYEIARR.H		1		542.3038	1082.5931	1082.5872	5.43	1	(6)	-26066.8	1	1960
	K.YLYEIARR.H		1		361.8719	1082.5938	1082.5872	6.02	1	10	43444.7	1	1961
	K.EACFAVEGPK.L		4		554.2637	1106.5129	1106.5066	5.67	0	70	304113	1	2149
	K.CCTESLVNR.R		2		569.7561	1137.4976	1137.4907	6.13	0	51	221568	1	2486
	K.KQTALVELLK.H		4		381.5785	1141.7136	1141.7070	5.71	1	(37)	-160745	1	2537
	K.KQTALVELLK.H		3		571.8644	1141.7142	1141.7070	6.29	1	71	308457	1	2540
	K.LVNELTEFAK.T		5		582.3222	1162.6298	1162.6234	5.57	0	71	308457	1	2665
	R.DTHKSEIAHR.F	U	4		597.3079	1192.6012	1192.5949	5.29	1	(40)	-173779	1	3009
	R.DTHKSEIAHR.F	U	5		398.5410	1192.6013	1192.5949	5.42	1	54	234601	1	3012
	R.FKDLGEEHFK.G		4		625.3166	1248.6186	1248.6139	3.81	1	(45)	-195501	1	3550
	R.FKDLGEEHFK.G		6		417.2143	1248.6210	1248.6139	5.67	1	47	204190	1	3558
	K.ECCDKPLLEK.S		2		646.3070	1290.5995	1290.5948	3.63	0	12	52133.6	1	4027
	K.FPKAEFVEVTK.L		1		647.8599	1293.7052	1293.6969	6.40	1	18	78200.4	1	4065
	K.HLVDEPQNLIK.Q		3		435.9124	1304.7154	1304.7088	5.04	0	(48)	-208535	1	4190
	K.HLVDEPQNLIK.Q		8		653.3654	1304.7162	1304.7088	5.62	0	69	299768	1	4193
	K.TVMENFVAFVDK.C	U	1		700.3539	1398.6932	1398.6853	5.62	0	(64)	-278046	1	5052
	K.TV->M<-ENFVAFVDK.C	U	4	Oxidation (M)	708.3516	1414.6887	1414.6803	5.95	0	(78)	-338869	1	5177
	K.SLHTLFGDELCK.V		4		710.3533	1418.6920	1418.6864	3.94	0	56	243290	1	5207
	K.SLHTLFGDELCK.V		6		473.9055	1418.6946	1418.6864	5.75	0	(39)	-169434	1	5217
	K.YICDNQDTISSK.L		5		722.3271	1442.6396	1442.6347	3.38	0	94	408380	1	5443
	K.TCVADESHAGCEK.S		1		488.5371	1462.5894	1462.5817	5.29	0	(47)	-204190	1	5619
	K.TCVADESHAGCEK.S		1		732.3021	1462.5897	1462.5817	5.48	0	51	221568	1	5620
	R.ETYGDMADCCEK.Q	U	2		739.7695	1477.5244	1477.5160	5.70	0	45	195501	1	5804
	K.LGEYGFQNALIVR.Y	U	2		493.9384	1478.7935	1478.7881	3.63	0	(31)	-134679	1	5820
	K.LGEYGFQNALIVR.Y	U	4		740.4046	1478.7946	1478.7881	4.40	0	98	425758	1	5821
	K.EYEATLEECCAK.D		3		751.8152	1501.6158	1501.6065	6.24	0	48	208535	1	6018
	K.VPQVSTPTLVEVSR.S		2		756.4296	1510.8447	1510.8355	6.08	0	61	265013	1	6081
	K.LKECCDKPLLEK.S		2		383.9522	1531.7795	1531.7738	3.72	1	(20)	-86889.4	1	6186
	K.LKECCDKPLLEK.S		2		766.8979	1531.7812	1531.7738	4.85	1	57	247635	1	6187
	K.LKECCDKPLLEK.S		3		511.6015	1531.7827	1531.7738	5.79	1	(42)	-182468	1	6189
	R.LCVLHEKTPVSEK.V		1		770.4181	1538.8216	1538.8127	5.83	1	61	265013	1	6260
	R.LCVLHEKTPVSEK.V		2		513.9479	1538.8220	1538.8127	6.07	1	(56)	-243290	1	6261
	R.LCVLHEKTPVSEK.V		1		385.7129	1538.8225	1538.8127	6.37	1	(16)	-69511.5	1	6262
	K.LKHLVDEPQNLIK.Q		2		773.9539	1545.8932	1545.8878	3.44	1	49	212879	1	6323
	K.LKHLVDEPQNLIK.Q		2		516.3054	1545.8943	1545.8878	4.14	1	(35)	-152056	1	6325
	K.DDPHACYSTVFDK.L	U	3		777.8336	1553.6527	1553.6457	4.51	0	56	243290	1	6399
	K.DAFLGSFLYEYSR.R		1		523.2545	1566.7416	1566.7354	3.90	0	(15)	-65167	1	6505
	K.DAFLGSFLYEYSR.R		5		784.3793	1566.7441	1566.7354	5.53	0	67	291079	1	6508
	K.LKPDPNTLCDEFK.A		4		788.8927	1575.7708	1575.7603	6.70	0	66	286735	1	6588
	K.LKPDPNTLCDEFK.A		4		526.2648	1575.7725	1575.7603	7.74	0	(45)	-195501	1	6591
	R.KVPQVSTPTLVEVSR.S		4		547.3207	1638.9404	1638.9305	6.05	1	(55)	-238946	1	7149
	R.KVPQVSTPTLVEVSR.S		3		820.4777	1638.9409	1638.9305	6.35	1	59	256324	1	7152
	K.YNGVFQECCQAEDK.G		5		874.3611	1746.7076	1746.6978	5.63	0	83	360591	1	7741
	K.ECCHGDLLECADDR.A		1		583.8956	1748.6649	1748.6553	5.50	0	14	60822.6	1	7757
	R.LAKEYEATLEECCAK.D		1		605.6171	1813.8296	1813.8226	3.85	1	(18)	-78200.4	1	8059
	R.LAKEYEATLEECCAK.D		1		907.9237	1813.8329	1813.8226	5.67	1	73	317146	1	8060
	R.RPCFSALTPDETYVPK.A		2		940.9694	1879.9243	1879.9138	5.56	0	(21)	-91233.8	1	8388
	R.RPCFSALTPDETYVPK.A		3		627.6490	1879.9253	1879.9138	6.11	0	28	121645	1	8391
	R.NECFLSHKDDSPDLPK.L		1		951.4440	1900.8734	1900.8625	5.72	1	(3)	-13033.4	1	8491
	R.NECFLSHKDDSPDLPK.L		1		476.2264	1900.8765	1900.8625	7.37	1	(44)	-191157	1	8493
	R.NECFLSHKDDSPDLPK.L		2		634.6329	1900.8770	1900.8625	7.60	1	49	212879	1	8495
	K.LFTFHADICTLPDTEK.Q		1		636.6480	1906.9220	1906.9135	4.46	0	13	56478.1	1	8531
	K.LFTFHADICTLPDTEK.Q		1		954.4686	1906.9226	1906.9135	4.76	0	(4)	-17377.9	1	8532
	K.CCAADDKEACFAVEGPK.L		4		643.2731	1926.7976	1926.7910	3.40	1	(78)	-338869	1	8671
	K.CCAADDKEACFAVEGPK.L		2		964.4075	1926.8004	1926.7910	4.86	1	88	382313	1	8673
	K.DAIPENLPPLTADFAEDK.D		3		978.4888	1954.9630	1954.9524	5.44	0	54	234601	1	8828
	K.DAIPENLPPLTADFAEDK.D		2		652.6617	1954.9634	1954.9524	5.64	0	(22)	-95578.3	1	8829
	K.LKPDPNTLCDEFKADEK.K		5		1010.4937	2018.9727	2018.9619	5.38	1	69	299768	1	9130
	K.LKPDPNTLCDEFKADEK.K		6		673.9989	2018.9749	2018.9619	6.43	1	(68)	-295424	1	9137
	K.LKPDPNTLCDEFKADEK.K		4		505.7513	2018.9760	2018.9619	7.00	1	(25)	-108612	1	9141
	K.VHKECCHGDLLECADDR.A		2		529.2299	2112.8903	2112.8775	6.05	1	14	60822.6	1	9537
	K.VHKECCHGDLLECADDR.A		1		705.3046	2112.8921	2112.8775	6.87	1	(0)	0	1	9539
	K.LKPDPNTLCDEFKADEKK.F		4		716.6975	2147.0707	2147.0568	6.46	2	21	91233.8	1	9729
	K.ECCHGDLLECADDRADLAK.Y		1		562.7451	2246.9511	2246.9354	6.99	1	(12)	-52133.6	1	10102
	K.ECCHGDLLECADDRADLAK.Y		1		749.9912	2246.9518	2246.9354	7.28	1	24	104267	1	10104
	K.DAIPENLPPLTADFAEDKDVCK.N		3		820.0683	2457.1831	2457.1733	3.96	1	70	304113	1	10791
	K.AFDEKLFTFHADICTLPDTEK.Q		2		833.4067	2497.1984	2497.1835	5.95	1	15	65167	1	10898
	K->.<-QEPERNECFLSHKDDSPDLPK.L		1	Gln->pyro-Glu (N-term Q)	842.0544	2523.1413	2523.1336	3.05	2	(3)	-13033.4	1	11051
	K.QEPERNECFLSHKDDSPDLPK.L		2		509.0415	2540.1710	2540.1601	4.26	2	(15)	-65167	1	11147
	K.QEPERNECFLSHKDDSPDLPK.L		3		636.0515	2540.1767	2540.1601	6.52	2	(17)	-73856	1	11151
	K.QEPERNECFLSHKDDSPDLPK.L		2		847.7330	2540.1771	2540.1601	6.67	2	30	130334	1	11152
	K.EYEATLEECCAKDDPHACYSTVFDK.L	U	1		1013.4269	3037.2588	3037.2416	5.67	1	5	21722.3	1	12371
G3X6N3	Serotransferrin OS=Bos taurus GN=TF PE=3 SV=1	79783	3533	182(134)	52(49)	15.10	62%	G3X6N3_uniprot		0.00228119	9.91055	-0.451	7.13
	Peptide	Unique	Matches	Modification	Observed	Mr(expt)	Mr(calc)	ppm	Miss	Score	#VALUE!	Rank	Query
	K.GDVAFVK.D		3		368.2078	734.4011	734.3963	6.52	0	28	121645	1	71
	K.CLASIAK.K		2		381.7147	761.4148	761.4105	5.63	0	48	208535	1	149
	K.DSADGFLK.I		3		426.7108	851.4071	851.4025	5.39	0	50	217223	1	743
	K.GYLAVAVVK.T		1		460.2873	918.5600	918.5538	6.66	0	49	212879	1	1025
	R.GPNHAVVSR.K		1		468.7566	935.4986	935.4937	5.25	0	51	221568	1	1079
	K.LCQLCAGK.G		2		475.2365	948.4585	948.4521	6.77	0	60	260668	1	1159
	K.TSHMDCIK.A		1		496.2238	990.4329	990.4263	6.73	0	12	52133.6	1	1420
	K.ENFEVLCK.D		3		519.7533	1037.4920	1037.4852	6.63	0	32	139023	1	1702
	R.SAGWNIPMGK.L	U	4		530.7695	1059.5245	1059.5171	6.96	0	62	269357	1	1860
	K.KSCHTAVDR.T		1		358.5120	1072.5141	1072.5084	5.38	1	14	60822.6	1	1915
	R.SAGWNIP->M<-GK.L	U	4	Oxidation (M)	538.7673	1075.5200	1075.5121	7.38	0	(16)	-69511.5	1	1924
	R.YYGYTGAFR.C		3		549.2592	1096.5039	1096.4978	5.56	0	41	178123	1	2090
	K.KTSHMDCIK.A		1		560.2713	1118.5280	1118.5212	6.09	1	34	147712	1	2288
	K.DLLFRDDTK.C		5		561.7953	1121.5761	1121.5717	3.98	1	41	178123	1	2324
	K.DLLFRDDTK.C		3		374.8660	1121.5762	1121.5717	4.00	1	(8)	-34755.8	1	2325
	K.WCAIGHQER.T		2		386.1841	1155.5304	1155.5244	5.24	0	(33)	-143367	1	2587
	K.WCAIGHQER.T		2		578.7731	1155.5317	1155.5244	6.37	0	37	160745	1	2590
	K.KENFEVLCK.D		2		583.8001	1165.5855	1165.5801	4.65	1	26	112956	1	2703
	K.LLEACTFHKP.-		1		608.3164	1214.6183	1214.6118	5.35	0	31	134679	1	3276
	K.LLEACTFHKP.-		3		405.8807	1214.6204	1214.6118	7.10	0	(20)	-86889.4	1	3278
	K.DTDFKLNELR.G		3		417.5532	1249.6377	1249.6302	6.00	1	(42)	-182468	1	3577
	K.DTDFKLNELR.G		3		625.8262	1249.6379	1249.6302	6.13	1	58	251979	1	3578
	K.DSADGFLKIPSK.M		3		639.3440	1276.6734	1276.6663	5.58	1	48	208535	1	3903
	K.DSADGFLKIPSK.M		2		426.5652	1276.6737	1276.6663	5.82	1	(33)	-143367	1	3904
	K.ILNKQQDDFGK.S		2		435.9008	1304.6806	1304.6725	6.27	1	(46)	-199846	1	4181
	K.ILNKQQDDFGK.S		2		653.3478	1304.6810	1304.6725	6.56	1	56	243290	1	4183
	K.ELPDPQESIQR.A		6		656.3346	1310.6546	1310.6466	6.11	0	60	260668	1	4270
	K.ELPDPQESIQR.A		1		437.8925	1310.6556	1310.6466	6.88	0	(10)	-43444.7	1	4274
	R.ILESGPFVSCVK.K		4		668.3568	1334.6989	1334.6904	6.38	0	70	304113	1	4465
	R.WCTISTHEANK.C		2		449.5458	1345.6155	1345.6085	5.23	0	(28)	-121645	1	4586
	R.WCTISTHEANK.C		2		673.8155	1345.6164	1345.6085	5.91	0	52	225912	1	4589
	K.NYELLCGDNTR.K		3		677.8096	1353.6046	1353.5983	4.65	0	47	204190	1	4667
	K.CGLVPVLAENYK.T		3		681.8616	1361.7087	1361.7013	5.43	0	63	273702	1	4751
	R.CLVEKGDVAFVK.D		1		455.5828	1363.7265	1363.7170	7.01	1	49	212879	1	4769
	K.KDTDFKLNELR.G		1		689.8732	1377.7318	1377.7252	4.78	2	76	330180	1	4804
	K.KDTDFKLNELR.G		1		460.2515	1377.7327	1377.7252	5.42	2	(44)	-191157	1	4805
	K.TSDANINWNNLK.G		4		695.3458	1388.6771	1388.6684	6.26	0	79	343213	1	4929
	K.CLMEGAGDVAFVK.H		3		698.8362	1395.6579	1395.6527	3.77	0	71	308457	1	5031
	K.CL->M<-EGAGDVAFVK.H		3	Oxidation (M)	706.8336	1411.6526	1411.6476	3.53	0	(59)	-256324	1	5159
	K.GTGKECVPNSNER.Y		1		483.2272	1446.6598	1446.6521	5.28	1	26	112956	1	5468
	K.GTGKECVPNSNER.Y		1		724.3375	1446.6605	1446.6521	5.78	1	(17)	-73856	1	5469
	K.TYDSYLGDDYVR.A		7		733.8286	1465.6427	1465.6361	4.45	0	79	343213	1	5639
	K.ENFEVLCKDGTR.K		1		734.3540	1466.6934	1466.6824	7.55	1	30	130334	1	5655
	K.ENFEVLCKDGTR.K		1		489.9054	1466.6944	1466.6824	8.18	1	(12)	-52133.6	1	5656
	K.DLLFKDSADGFLK.I		2		490.2635	1467.7686	1467.7609	5.25	1	41	178123	1	5680
	R.KNYELLCGDNTR.K		2		741.8581	1481.7016	1481.6933	5.65	1	68	295424	1	5837
	K.NYELLCGDNTRK.S		2		494.9080	1481.7021	1481.6933	6.00	1	(20)	-86889.4	1	5839
	K.NYELLCGDNTRK.S		1		741.8584	1481.7022	1481.6933	6.07	1	45	195501	1	5840
	R.KNYELLCGDNTR.K		2		494.9082	1481.7029	1481.6933	6.49	1	(49)	-212879	1	5842
	K.NTPEKGYLAVAVVK.T		1		744.9294	1487.8443	1487.8348	6.43	1	(19)	-82544.9	1	5869
	K.NTPEKGYLAVAVVK.T		1		496.9557	1487.8453	1487.8348	7.10	1	47	204190	1	5870
	R.KPVTDAENCHLAR.G		1		378.4431	1509.7434	1509.7358	5.02	0	(68)	-295424	1	6077
	R.KPVTDAENCHLAR.G		1		755.8801	1509.7456	1509.7358	6.49	0	(55)	-238946	1	6078
	R.KPVTDAENCHLAR.G		1		504.2559	1509.7458	1509.7358	6.66	0	97	421413	1	6079
	K.NLKKENFEVLCK.D		1		507.9453	1520.8142	1520.8021	7.98	2	25	108612	1	6116
	K.KTYDSYLGDDYVR.A		3		797.8766	1593.7386	1593.7311	4.73	1	111	482236	1	6768
	K.KTYDSYLGDDYVR.A		3		532.2540	1593.7401	1593.7311	5.64	1	(48)	-208535	1	6772
	K.DNPQTHYYAVAVVK.K		2		802.9117	1603.8088	1603.7995	5.83	0	63	273702	1	6855
	K.HSTVFDNLPNPEDR.K		4		820.8909	1639.7672	1639.7590	4.96	0	90	391002	1	7155
	K.HSTVFDNLPNPEDR.K		6		547.5966	1639.7680	1639.7590	5.48	0	(66)	-286735	1	7159
	K.FDEFFSAGCAPGSPR.N		2		822.8643	1643.7141	1643.7039	6.22	0	59	256324	1	7184
	K.LYKELPDPQESIQR.A		4		858.4550	1714.8955	1714.8890	3.81	1	(33)	-143367	1	7607
	K.LYKELPDPQESIQR.A		2		572.6395	1714.8966	1714.8890	4.44	1	46	199846	1	7608
	R.ESKPPDSSKDECMVK.W		1		434.9540	1735.7869	1735.7757	6.49	1	(28)	-121645	1	7694
	R.ESKPPDSSKDECMVK.W		1		579.6030	1735.7871	1735.7757	6.58	1	35	152056	1	7695
	K.DKPDNFQLFQSPHGK.D		2		879.4392	1756.8637	1756.8533	5.95	0	60	260668	1	7785
	K.DKPDNFQLFQSPHGK.D		1		440.2234	1756.8645	1756.8533	6.36	0	(25)	-108612	1	7786
	K.DKPDNFQLFQSPHGK.D		3		586.6288	1756.8645	1756.8533	6.39	0	(53)	-230257	1	7788
	K.HSTVFDNLPNPEDRK.N		4		590.2950	1767.8633	1767.8540	5.25	1	(38)	-165090	1	7856
	K.HSTVFDNLPNPEDRK.N		2		884.9390	1767.8635	1767.8540	5.38	1	40	173779	1	7858
	K.GEADAMSLDGGYLYIAGK.C		3		915.9366	1829.8586	1829.8505	4.41	0	111	482236	1	8110
	K.GEADA->M<-SLDGGYLYIAGK.C		1	Oxidation (M)	923.9353	1845.8560	1845.8455	5.74	0	(30)	-130334	1	8189
	K.DGTRKPVTDAENCHLAR.G		1		647.3213	1938.9420	1938.9330	4.66	1	(45)	-195501	1	8732
	K.DGTRKPVTDAENCHLAR.G		1		485.7429	1938.9423	1938.9330	4.82	1	71	308457	1	8733
	K.DQTVIQNTDGNNNEAWAK.N		2		673.3152	2016.9239	2016.9137	5.07	0	(56)	-243290	1	9092
	K.DQTVIQNTDGNNNEAWAK.N		4		1009.4705	2016.9265	2016.9137	6.34	0	92	399691	1	9094
	K.CGLVPVLAENYKTEDGSCK.N	U	1		714.0099	2139.0078	2138.9976	4.77	1	11	47789.2	1	9693
	K.IMKGEADAMSLDGGYLYIAGK.C		1		735.0333	2202.0780	2202.0700	3.59	1	50	217223	1	9960
	R.WSGFSGGAIECETAENTEECIAK.I		2		849.3672	2545.0797	2545.0737	2.37	0	(7)	-30411.3	1	11164
	R.WSGFSGGAIECETAENTEECIAK.I		1		1273.5492	2545.0838	2545.0737	3.98	0	19	82544.9	1	11166
	K.GDVAFVKDQTVIQNTDGNNNEAWAK.N		3		912.1128	2733.3167	2733.2994	6.32	1	95	412725	1	11877
B0JYQ0	ALB protein OS=Bos taurus GN=ALB PE=2 SV=1	71244	3229	215(127)	47(38)	13.92	63%	B0JYQ0_uniprot		0.0030178	13.1107	-0.432	5.95
	Peptide	Unique	Matches	Modification	Observed	Mr(expt)	Mr(calc)	ppm	Miss	Score	#VALUE!	Rank	Query
	K.GACLLPK.I		5		379.7174	757.4201	757.4156	5.96	0	36	156401	1	138
	K.LVTDLTK.V		5		395.2415	788.4685	788.4644	5.22	0	42	182468	1	233
	R.LSQKFPK.A		4		424.2570	846.4995	846.4963	3.74	1	40	173779	1	682
	R.LCVLHEK.T		3		449.7466	897.4786	897.4742	4.90	0	34	147712	1	897
	K.AEFVEVTK.L		3		461.7509	921.4872	921.4807	7.04	0	32	139023	1	1028
	K.YLYEIAR.R		4		464.2523	926.4901	926.4861	4.27	0	36	156401	1	1032
	K.DLGEEHFK.G		2		487.7353	973.4560	973.4505	5.62	0	35	152056	1	1306
	R.EKVLTSSAR.Q	U	1		495.7849	989.5553	989.5505	4.84	1	32	139023	1	1419
	K->.<-QTALVELLK.H		2	Gln->pyro-Glu (N-term Q)	499.3034	996.5923	996.5855	6.81	0	(36)	-156401	1	1459
	K.LVVSTQTALA.-		10		501.7992	1001.5839	1001.5757	8.16	0	20	86889.4	1	1498
	K.QTALVELLK.H		4		507.8168	1013.6191	1013.6121	6.94	0	60	260668	1	1543
	K.SHCIAEVEK.D		1		358.1762	1071.5067	1071.5019	4.51	0	(25)	-108612	1	1911
	K.SHCIAEVEK.D		1		536.7613	1071.5080	1071.5019	5.74	0	33	143367	1	1912
	K.YLYEIARR.H		1		542.3038	1082.5931	1082.5872	5.43	1	(6)	-26066.8	1	1960
	K.YLYEIARR.H		1		361.8719	1082.5938	1082.5872	6.02	1	10	43444.7	1	1961
	K.EACFAVEGPK.L		4		554.2637	1106.5129	1106.5066	5.67	0	70	304113	1	2149
	K.CCTESLVNR.R		2		569.7561	1137.4976	1137.4907	6.13	0	51	221568	1	2486
	K.KQTALVELLK.H		4		381.5785	1141.7136	1141.7070	5.71	1	(37)	-160745	1	2537
	K.KQTALVELLK.H		3		571.8644	1141.7142	1141.7070	6.29	1	71	308457	1	2540
	K.LVNELTEFAK.T		5		582.3222	1162.6298	1162.6234	5.57	0	71	308457	1	2665
	R.FKDLGEEHFK.G		4		625.3166	1248.6186	1248.6139	3.81	1	(45)	-195501	1	3550
	R.FKDLGEEHFK.G		6		417.2143	1248.6210	1248.6139	5.67	1	47	204190	1	3558
	K.ECCDKPLLEK.S		2		646.3070	1290.5995	1290.5948	3.63	0	12	52133.6	1	4027
	K.FPKAEFVEVTK.L		1		647.8599	1293.7052	1293.6969	6.40	1	18	78200.4	1	4065
	K.HLVDEPQNLIK.Q		3		435.9124	1304.7154	1304.7088	5.04	0	(48)	-208535	1	4190
	K.HLVDEPQNLIK.Q		8		653.3654	1304.7162	1304.7088	5.62	0	69	299768	1	4193
	K.SLHTLFGDELCK.V		4		710.3533	1418.6920	1418.6864	3.94	0	56	243290	1	5207
	K.SLHTLFGDELCK.V		6		473.9055	1418.6946	1418.6864	5.75	0	(39)	-169434	1	5217
	K.YICDNQDTISSK.L		5		722.3271	1442.6396	1442.6347	3.38	0	94	408380	1	5443
	K.TCVADESHAGCEK.S		1		488.5371	1462.5894	1462.5817	5.29	0	(47)	-204190	1	5619
	K.TCVADESHAGCEK.S		1		732.3021	1462.5897	1462.5817	5.48	0	51	221568	1	5620
	K.EYEATLEECCAK.D		3		751.8152	1501.6158	1501.6065	6.24	0	48	208535	1	6018
	K.VPQVSTPTLVEVSR.S		2		756.4296	1510.8447	1510.8355	6.08	0	61	265013	1	6081
	K.LKECCDKPLLEK.S		2		383.9522	1531.7795	1531.7738	3.72	1	(20)	-86889.4	1	6186
	K.LKECCDKPLLEK.S		2		766.8979	1531.7812	1531.7738	4.85	1	57	247635	1	6187
	K.LKECCDKPLLEK.S		3		511.6015	1531.7827	1531.7738	5.79	1	(42)	-182468	1	6189
	K.LGEYGFQNELIVR.Y	U	1		769.4080	1536.8015	1536.7936	5.12	0	17	73856	1	6236
	R.LCVLHEKTPVSEK.V		1		770.4181	1538.8216	1538.8127	5.83	1	61	265013	1	6260
	R.LCVLHEKTPVSEK.V		2		513.9479	1538.8220	1538.8127	6.07	1	(56)	-243290	1	6261
	R.LCVLHEKTPVSEK.V		1		385.7129	1538.8225	1538.8127	6.37	1	(16)	-69511.5	1	6262
	K.LKHLVDEPQNLIK.Q		2		773.9539	1545.8932	1545.8878	3.44	1	49	212879	1	6323
	K.LKHLVDEPQNLIK.Q		2		516.3054	1545.8943	1545.8878	4.14	1	(35)	-152056	1	6325
	K.DAFLGSFLYEYSR.R		1		523.2545	1566.7416	1566.7354	3.90	0	(15)	-65167	1	6505
	K.DAFLGSFLYEYSR.R		5		784.3793	1566.7441	1566.7354	5.53	0	67	291079	1	6508
	K.LKPDPNTLCDEFK.A		4		788.8927	1575.7708	1575.7603	6.70	0	66	286735	1	6588
	K.LKPDPNTLCDEFK.A		4		526.2648	1575.7725	1575.7603	7.74	0	(45)	-195501	1	6591
	R.KVPQVSTPTLVEVSR.S		4		547.3207	1638.9404	1638.9305	6.05	1	(55)	-238946	1	7149
	R.KVPQVSTPTLVEVSR.S		3		820.4777	1638.9409	1638.9305	6.35	1	59	256324	1	7152
	K.YNGVFQECCQAEDK.G		5		874.3611	1746.7076	1746.6978	5.63	0	83	360591	1	7741
	K.ECCHGDLLECADDR.A		1		583.8956	1748.6649	1748.6553	5.50	0	14	60822.6	1	7757
	R.LAKEYEATLEECCAK.D		1		605.6171	1813.8296	1813.8226	3.85	1	(18)	-78200.4	1	8059
	R.LAKEYEATLEECCAK.D		1		907.9237	1813.8329	1813.8226	5.67	1	73	317146	1	8060
	R.RPCFSALTPDETYVPK.A		2		940.9694	1879.9243	1879.9138	5.56	0	(21)	-91233.8	1	8388
	R.RPCFSALTPDETYVPK.A		3		627.6490	1879.9253	1879.9138	6.11	0	28	121645	1	8391
	R.NECFLSHKDDSPDLPK.L		1		951.4440	1900.8734	1900.8625	5.72	1	(3)	-13033.4	1	8491
	R.NECFLSHKDDSPDLPK.L		1		476.2264	1900.8765	1900.8625	7.37	1	(44)	-191157	1	8493
	R.NECFLSHKDDSPDLPK.L		2		634.6329	1900.8770	1900.8625	7.60	1	49	212879	1	8495
	K.LFTFHADICTLPDTEK.Q		1		636.6480	1906.9220	1906.9135	4.46	0	13	56478.1	1	8531
	K.LFTFHADICTLPDTEK.Q		1		954.4686	1906.9226	1906.9135	4.76	0	(4)	-17377.9	1	8532
	K.CCAADDKEACFAVEGPK.L		4		643.2731	1926.7976	1926.7910	3.40	1	(78)	-338869	1	8671
	K.CCAADDKEACFAVEGPK.L		2		964.4075	1926.8004	1926.7910	4.86	1	88	382313	1	8673
	K.DAIPENLPPLTADFAEDK.D		3		978.4888	1954.9630	1954.9524	5.44	0	54	234601	1	8828
	K.DAIPENLPPLTADFAEDK.D		2		652.6617	1954.9634	1954.9524	5.64	0	(22)	-95578.3	1	8829
	K.LKPDPNTLCDEFKADEK.K		5		1010.4937	2018.9727	2018.9619	5.38	1	69	299768	1	9130
	K.LKPDPNTLCDEFKADEK.K		6		673.9989	2018.9749	2018.9619	6.43	1	(68)	-295424	1	9137
	K.LKPDPNTLCDEFKADEK.K		4		505.7513	2018.9760	2018.9619	7.00	1	(25)	-108612	1	9141
	K.VHKECCHGDLLECADDR.A		2		529.2299	2112.8903	2112.8775	6.05	1	14	60822.6	1	9537
	K.VHKECCHGDLLECADDR.A		1		705.3046	2112.8921	2112.8775	6.87	1	(0)	0	1	9539
	K.LKPDPNTLCDEFKADEKK.F		4		716.6975	2147.0707	2147.0568	6.46	2	21	91233.8	1	9729
	K.ECCHGDLLECADDRADLAK.Y		1		562.7451	2246.9511	2246.9354	6.99	1	(12)	-52133.6	1	10102
	K.ECCHGDLLECADDRADLAK.Y		1		749.9912	2246.9518	2246.9354	7.28	1	24	104267	1	10104
	K.DAIPENLPPLTADFAEDKDVCK.N		3		820.0683	2457.1831	2457.1733	3.96	1	70	304113	1	10791
	K.AFDEKLFTFHADICTLPDTEK.Q		2		833.4067	2497.1984	2497.1835	5.95	1	15	65167	1	10898
	K->.<-QEPERNECFLSHKDDSPDLPK.L		1	Gln->pyro-Glu (N-term Q)	842.0544	2523.1413	2523.1336	3.05	2	(3)	-13033.4	1	11051
	K.QEPERNECFLSHKDDSPDLPK.L		2		509.0415	2540.1710	2540.1601	4.26	2	(15)	-65167	1	11147
	K.QEPERNECFLSHKDDSPDLPK.L		3		636.0515	2540.1767	2540.1601	6.52	2	(17)	-73856	1	11151
	K.QEPERNECFLSHKDDSPDLPK.L		2		847.7330	2540.1771	2540.1601	6.67	2	30	130334	1	11152
	Peptide	Unique	Matches	Modification	Observed	Mr(expt)	Mr(calc)	ppm	Miss	Score	#VALUE!	Rank	Query
	K.INVEVR.G		2		365.2181	728.4216	728.4181	4.85	0	57	247635	1	54
	K.ILQVER.E		2		379.2346	756.4547	756.4494	7.11	0	43	186812	1	122
	R.AVDLIQK.G	U	2		393.7420	785.4695	785.4647	6.13	0	40	173779	1	210
	R.IQEFRK.R	U	1		410.7399	819.4653	819.4603	6.15	1	10	43444.7	6	472
	R.ANTFLGAK.A	U	2		411.2321	820.4497	820.4443	6.65	0	50	217223	1	473
	R.GQIVSVHR.E	U	1		448.2607	894.5069	894.5036	3.77	0	31	134679	1	890
	K.FACYSPR.V	U	2		450.7073	899.4001	899.3960	4.63	0	37	160745	1	905
	R.VDYGFQVK.V	U	2		478.2505	954.4865	954.4811	5.65	0	52	225912	1	1180
	R.TRGQVGLAR.A		1		479.2856	956.5565	956.5516	5.22	1	28	121645	1	1192
	R.ICFLHLR.R	U	2		479.7711	957.5276	957.5218	6.05	0	0	0	1	1205
	R.RVENSISR.A	U	1		480.7673	959.5201	959.5148	5.52	1	23	99922.8	1	1216
	K.LNLKTESR.A		1		480.7801	959.5456	959.5400	5.84	1	45	195501	1	1217
	R.EFHMHLR.L	U	1		485.2428	968.4710	968.4650	6.20	0	15	65167	1	1283
	R.IGVPLSVAVK.L	U	2		491.8214	981.6282	981.6223	6.05	0	58	251979	1	1360
	R.QGSFQGGFR.S		2		492.2409	982.4673	982.4621	5.26	0	47	204190	1	1364
	K.LELNVDSSK.A		1		502.7686	1003.5227	1003.5186	4.16	0	59	256324	1	1500
	K.AYRPGDTVK.L		2		503.7723	1005.5301	1005.5243	5.76	0	20	86889.4	1	1502
	K.AEFQGVLEK.L		1		510.7741	1019.5337	1019.5287	4.83	0	44	191157	1	1588
	K.VDFSLSSDR.D		2		513.2520	1024.4895	1024.4825	6.76	0	46	199846	1	1627
	K.SHKPLDMVK.V		1		352.1963	1053.5670	1053.5641	2.80	0	23	99922.8	1	1815
	K.SHKPLDMVK.V		1		527.7915	1053.5684	1053.5641	4.14	0	(12)	-52133.6	1	1816
	K.CSVFYGAPR.K	U	5		528.7526	1055.4907	1055.4859	4.58	0	50	217223	1	1830
	K.LGQYTSPVAK.R		2		532.2958	1062.5771	1062.5710	5.81	0	58	251979	1	1882
	R.FGLLGEDGEK.T		4		532.7706	1063.5266	1063.5186	7.53	0	70	304113	1	1886
	R.GQQDLEGYR.M	U	3		533.2545	1064.4944	1064.4887	5.35	0	56	243290	1	1896
	R.ITQVLHFTK.D	U	2		543.8214	1085.6283	1085.6233	4.54	0	57	247635	1	1992
	R.ITQVLHFTK.D	U	2		362.8843	1085.6310	1085.6233	7.07	0	(29)	-125990	1	1995
	K.YVLPNFEVK.I		4		554.8076	1107.6007	1107.5964	3.84	0	51	221568	1	2169
	R.LLLFSPSVVR.I		3		565.8534	1129.6922	1129.6859	5.58	0	34	147712	1	2404
	R.YRVFALDQK.M		2		380.5472	1138.6197	1138.6135	5.47	1	(30)	-130334	1	2502
	R.YRVFALDQK.M		3		570.3173	1138.6201	1138.6135	5.80	1	47	204190	1	2503
	K.TTGLCVATPAR.L		3		573.8044	1145.5942	1145.5863	6.90	0	65	282390	1	2553
	R.DGSYGAWLHR.D	U	3		581.2777	1160.5409	1160.5363	3.94	0	49	212879	1	2632
	K.LQDAPSGQVVR.G	U	2		585.3209	1168.6273	1168.6200	6.20	0	48	208535	1	2785
	K.AAGLAFSDGDHR.T		2		406.1975	1215.5708	1215.5632	6.21	0	(49)	-212879	1	3280
	K.AAGLAFSDGDHR.T		1		608.7927	1215.5709	1215.5632	6.29	0	74	321491	1	3281
	K.KYVLPNFEVK.I		1		618.8547	1235.6949	1235.6914	2.86	1	4	17377.9	1	3430
	R.DMSGSPASSIPVK.V	U	3		638.3185	1274.6224	1274.6176	3.74	0	66	286735	1	3860
	R.GQIVSVHREPR.S	U	1		426.5753	1276.7041	1276.7000	3.23	1	(11)	-47789.2	1	3909
	R.GQIVSVHREPR.S	U	2		639.3602	1276.7059	1276.7000	4.62	1	27	117301	1	3911
	R.D->M<-SGSPASSIPVK.V	U	4	Oxidation (M)	646.3182	1290.6219	1290.6126	7.26	0	(21)	-91233.8	1	4032
	R.GQQDLEGYRMK.F	U	1		662.8245	1323.6345	1323.6241	7.84	1	1	4344.47	2	4432
	R.GSFDFPVGDAISK.I	U	3		670.3329	1338.6512	1338.6456	4.20	0	44	191157	1	4475
	K.VEEVDRFSQLR.L		2		689.3634	1376.7122	1376.7048	5.40	1	39	169434	1	4786
	K.VEEVDRFSQLR.L		2		459.9117	1376.7133	1376.7048	6.16	1	(28)	-121645	1	4787
	R.LEEELQFSLGSK.I		3		690.3600	1378.7054	1378.6980	5.40	0	35	152056	1	4817
	R.NPSHVNELCSPK.V		2		691.3326	1380.6507	1380.6456	3.73	0	53	230257	1	4829
	R.NPSHVNELCSPK.V		1		461.2243	1380.6510	1380.6456	3.91	0	(26)	-112956	1	4830
	K.LVDGQCQISLQK.A		3		694.8673	1387.7201	1387.7130	5.13	0	86	373624	1	4917
	K.AELADQAASWLTR.Q		2		716.3688	1430.7231	1430.7154	5.43	0	22	95578.3	1	5323
	K.ILSLAQDQVGGSAEK.L	U	1		758.4099	1514.8053	1514.7940	7.42	0	77	334524	1	6088
	R.FGLLGEDGEKTFLR.G		2		791.4191	1580.8236	1580.8199	2.36	1	(58)	-251979	1	6624
	R.FGLLGEDGEKTFLR.G		3		527.9497	1580.8273	1580.8199	4.71	1	65	282390	1	6627
	K.QTDMQGVNLLFSSR.R		3		798.4003	1594.7860	1594.7773	5.42	0	75	325835	1	6784
	K.QTDMQGVNLLFSSR.R		2		532.6032	1594.7876	1594.7773	6.44	0	(17)	-73856	1	6787
	K.QTD->M<-QGVNLLFSSR.R		2	Oxidation (M)	806.3978	1610.7811	1610.7723	5.49	0	(38)	-165090	1	6895
	R.DDGPFHDPCPVIHR.E	U	2		554.5919	1660.7538	1660.7417	7.29	0	36	156401	1	7279
	R.ALVALGAVDTALYAVGGK.S		1		844.9884	1687.9622	1687.9509	6.74	0	42	182468	1	7424
	R.ALVALGAVDTALYAVGGK.S		1		563.6614	1687.9625	1687.9509	6.89	0	(35)	-152056	1	7425
	K.EYLIMGLDGATYDLK.G	U	2		851.4286	1700.8427	1700.8331	5.67	0	24	104267	1	7509
	K.AAGLAFSDGDHRTEIR.K		2		572.6237	1714.8492	1714.8387	6.10	1	35	152056	1	7601
	K.AAGLAFSDGDHRTEIR.K		1		858.4334	1714.8523	1714.8387	7.92	1	(12)	-52133.6	1	7603
	R.EEMVYELNPLDPLGR.T	U	1		887.9439	1773.8731	1773.8607	7.02	0	29	125990	1	7890
	K.AAGLAFSDGDHRTEIRK.S		2		615.3226	1842.9461	1842.9336	6.74	2	26	112956	1	8153
	K.LLSTLCSADVCQCAEGK.C	U	1		956.4394	1910.8642	1910.8536	5.55	0	61	265013	1	8553
	R.TLEIPGNSDPNIIPEGDFK.S	U	2		1028.5209	2055.0272	2055.0160	5.43	0	26	112956	1	9296
	R.RGHLFLQTDQPVYNPGQR.V	U	1		709.3731	2125.0975	2125.0817	7.42	1	7	30411.3	1	9608
	K.MRPATDILTVTVENSQGFR.V	U	2		712.3731	2134.0975	2134.0841	6.28	0	38	165090	1	9646
	K.->M<-RPATDILTVTVENSQGFR.V	U	2	Oxidation (M)	717.7040	2150.0903	2150.0790	5.25	0	(20)	-86889.4	1	9744
	R.AMELLQEEDLIEEDDIPVR.S		2		753.0388	2256.0946	2256.0831	5.11	0	(72)	-312802	1	10157
	R.AMELLQEEDLIEEDDIPVR.S		2		1129.0548	2256.0951	2256.0831	5.31	0	122	530025	1	10159
	R.A->M<-ELLQEEDLIEEDDIPVR.S		3	Oxidation (M)	1137.0523	2272.0899	2272.0780	5.25	0	(107)	-464858	1	10251
	K.NQDFEQNTDGSGQVIVSIGVPR.T	U	3		787.3923	2359.1552	2359.1404	6.24	0	28	121645	1	10537
	K.GDPQYLLDSNSWIEEMPSER.M	U	1		1183.5370	2365.0594	2365.0532	2.63	0	(34)	-147712	1	10561
	K.GDPQYLLDSNSWIEEMPSER.M	U	1		789.3620	2365.0642	2365.0532	4.64	0	44	191157	1	10562
	R.EGALHREEMVYELNPLDPLGR.T	U	1		813.4177	2437.2312	2437.2059	10.3	1	0	0	1	10763
	R.LQLEPGKEYLIMGLDGATYDLK.G	U	1		823.1006	2466.2799	2466.2716	3.39	1	19	82544.9	1	10819
	R.LYVAAAVIESPGGEMEEAELTSWR.F	U	1		1304.6421	2607.2696	2607.2526	6.52	0	(7)	-30411.3	1	11394
	R.LYVAAAVIESPGGEMEEAELTSWR.F	U	7		870.0980	2607.2721	2607.2526	7.45	0	33	143367	1	11397
	R.STQDTVVALDALSAYWIASYTAEEK.G	U	1		911.4544	2731.3414	2731.3228	6.80	0	1	4344.47	1	11873
Q7SIH1	Alpha-2-macroglobulin OS=Bos taurus GN=A2M PE=1 SV=2	168953	2210	157(89)	56(45)	1.76	41%	Q7SIH1_uniprot		0.000929253	4.03711	-0.19	5.71
	Peptide	Unique	Matches	Modification	Observed	Mr(expt)	Mr(calc)	ppm	Miss	Score	#VALUE!	Rank	Query
	R.GIPFTGK.V		3		360.2101	718.4056	718.4014	5.88	0	28	121645	1	28
	K.GTSLSIR.V		1		367.2154	732.4162	732.4130	4.42	0	28	121645	1	61
	K.VLLVDGK.G		1		372.2382	742.4618	742.4589	3.95	0	30	130334	1	72
	K.YNILPK.K		3		374.2261	746.4377	746.4326	6.81	0	19	82544.9	1	89
	R.GEAFTLK.A		3		383.2123	764.4100	764.4068	4.14	0	38	165090	1	162
	K.FEVQVR.M		1		389.2184	776.4223	776.4181	5.46	0	31	134679	1	196
	K.AGALCLSR.D		2		424.2296	846.4446	846.4382	7.62	0	61	265013	1	677
	K.VSESLSLK.L	U	2		431.7497	861.4849	861.4807	4.85	0	37	160745	1	753
	R.DLKPAIVK.V		2		442.2868	882.5591	882.5538	5.98	0	32	139023	1	879
	R.VTMNMCR.K		1		456.2003	910.3860	910.3823	4.02	0	46	199846	1	985
	R.VT->M<-N->M<-CR.K		1	2 Oxidation (M)	472.1921	942.3697	942.3721	-2.63	0	(1)	-4344.47	1	1102
	K.RQEFEMK.I		1		484.2399	966.4652	966.4593	6.18	1	27	117301	1	1266
	K.IKGTSLSIR.V		1		487.8061	973.5976	973.5920	5.77	1	16	69511.5	1	1309
	K.ATVLNYLPK.C		3		509.8029	1017.5912	1017.5859	5.22	0	23	99922.8	1	1578
	R.YGAATFTSAR.K		2		522.7624	1043.5102	1043.5036	6.35	0	62	269357	1	1711
	R->.<-QTVSWAVTPK.S		1	Gln->pyro-Glu (N-term Q)	550.2971	1098.5797	1098.5710	7.92	0	(31)	-134679	1	2107
	R.SLFTDVVAEK.D		2		554.8008	1107.5871	1107.5812	5.36	0	(64)	-278046	1	2163
	R.QTVSWAVTPK.S		4		558.8096	1115.6046	1115.5975	6.34	0	77	334524	1	2262
	R.STGTLLNNAIK.G	U	3		566.3255	1130.6364	1130.6295	6.13	0	48	208535	1	2419
	K.GATEITTTITK.L		3		568.3161	1134.6176	1134.6132	3.90	0	56	243290	1	2445
	K.LPPNVVEESAR.A	U	6		605.8284	1209.6423	1209.6353	5.77	0	71	308457	1	3229
	R.LLTEDIYQPR.A	U	3		624.3389	1246.6633	1246.6557	6.08	0	81	351902	1	3544
	K.LSFVTVDSNLR.R		2		625.8433	1249.6720	1249.6667	4.25	0	54	234601	1	3588
	R.YEIEHCLANK.V	U	2		638.8070	1275.5993	1275.5917	5.97	0	52	225912	1	3873
	R.YEIEHCLANK.V	U	2		426.2077	1275.6013	1275.5917	7.48	0	(27)	-117301	1	3875
	R.DTGLGLSPTASLR.V		4		644.3522	1286.6898	1286.6830	5.25	0	61	265013	1	3975
	K.TQTVQAHYVLK.G		2		644.3606	1286.7066	1286.6983	6.50	0	60	260668	1	3983
	R.NALFCLDSAWK.S		3		662.8245	1323.6345	1323.6281	4.79	0	75	325835	1	4432
	R.IQHHTLLASPVR.A		2		457.9363	1370.7870	1370.7783	6.39	0	10	43444.7	1	4777
	K.LSFVTVDSNLRR.G		1		469.6000	1405.7781	1405.7678	7.36	1	25	108612	1	5119
	R.SNSFVYLEPLPR.E		3		711.3790	1420.7434	1420.7350	5.87	0	58	251979	1	5263
	K.IQEEGTEVELTGK.G		3		716.8664	1431.7182	1431.7093	6.24	0	73	317146	1	5329
	R.TEVLTSLYEEAVK.E		2		741.3947	1480.7749	1480.7661	5.94	0	49	212879	1	5834
	R.ASFSVLGDILGSAMR.N	U	1		762.4037	1522.7929	1522.7814	7.61	0	28	121645	1	6134
	K.HFDGSYSTFGEHR.G	U	3		513.8939	1538.6599	1538.6539	3.94	0	34	147712	1	6245
	K.ALLAYAFALAGNQER.R		1		804.4381	1606.8617	1606.8467	9.32	0	39	169434	1	6875
	R.GNSEGNTWLTAFVLK.S	U	1		818.9244	1635.8343	1635.8257	5.29	0	84	364935	1	7100
	R.RTEVLTSLYEEAVK.E		1		819.4454	1636.8763	1636.8672	5.58	1	(10)	-43444.7	1	7125
	R.RTEVLTSLYEEAVK.E		2		546.6344	1636.8814	1636.8672	8.68	1	20	86889.4	1	7128
	R.TEVSNNHVLIYLDK.V		1		822.9335	1643.8525	1643.8519	0.39	0	(0)	0	2	7190
	R.TEVSNNHVLIYLDK.V		1		548.9616	1643.8630	1643.8519	6.77	0	40	173779	1	7191
	R.SPTSQEVMFLTIQVK.G		2		854.4576	1706.9006	1706.8913	5.45	0	65	282390	1	7547
	R.SPTSQEV->M<-FLTIQVK.G		1	Oxidation (M)	862.4545	1722.8945	1722.8862	4.80	0	(3)	-13033.4	1	7647
	K.DTIIKPLLVEPEGLEK.E	U	2		897.5214	1793.0282	1793.0186	5.34	0	50	217223	1	7970
	K.DTIIKPLLVEPEGLEK.E	U	3		598.6837	1793.0293	1793.0186	5.99	0	(37)	-160745	1	7971
	R.NPSNCYGEESNAVCEK.F		1		929.3775	1856.7404	1856.7305	5.36	0	17	73856	1	8263
	R.LLIYAILPDGEVVGDSAR.Y		2		951.0268	1900.0390	1900.0306	4.46	0	74	321491	1	8488
	R.LLIYAILPDGEVVGDSAR.Y		2		634.3556	1900.0449	1900.0306	7.57	0	(47)	-204190	1	8490
	R.KDTIIKPLLVEPEGLEK.E	U	1		641.3814	1921.1222	1921.1135	4.52	1	26	112956	1	8603
	R.DFVHFDDTSEPPTETVR.K		3		996.4598	1990.9051	1990.8909	7.15	0	47	204190	1	8992
	R.DFVHFDDTSEPPTETVR.K		4		664.6431	1990.9076	1990.8909	8.38	0	(47)	-204190	1	8995
	K.GSGGTAEHPFTVEEFVLPK.F		2		1001.5055	2000.9964	2000.9844	6.02	0	24	104267	1	9041
	K.VSESLSLKLPPNVVEESAR.A	U	3		1027.5649	2053.1153	2053.1055	4.79	1	7	30411.3	1	9282
	K.FSGELNNEGCFSQQVNTK.I	U	4		1029.9712	2057.9278	2057.9113	8.05	0	110	477892	1	9311
	R.DFVHFDDTSEPPTETVRK.Y		1		707.3403	2118.9990	2118.9858	6.20	1	(4)	-17377.9	1	9579
	R.DFVHFDDTSEPPTETVRK.Y		2		530.7574	2119.0005	2118.9858	6.90	1	6	26066.8	1	9580
	K.YRNPSNCYGEESNAVCEK.F		1		726.3102	2175.9089	2175.8949	6.42	1	4	17377.9	1	9842
	R.NRDFVHFDDTSEPPTETVR.K		6		754.6904	2261.0493	2261.0349	6.36	1	62	269357	1	10200
	R.NRDFVHFDDTSEPPTETVR.K		1		1131.5321	2261.0496	2261.0349	6.52	1	(19)	-82544.9	1	10201
	R.NRDFVHFDDTSEPPTETVR.K		1		566.2708	2261.0539	2261.0349	8.40	1	(6)	-26066.8	1	10206
	R.HFPPAAATDTAADAHDPARPGAK.V	U	5		572.0353	2284.1123	2284.0985	6.03	0	54	234601	1	10307
	R.HFPPAAATDTAADAHDPARPGAK.V	U	2		762.3785	2284.1136	2284.0985	6.62	0	(4)	-17377.9	1	10310
	R.NRDFVHFDDTSEPPTETVRK.Y		3		598.2929	2389.1423	2389.1299	5.20	2	23	99922.8	1	10621
	R.NRDFVHFDDTSEPPTETVRK.Y		2		797.3889	2389.1449	2389.1299	6.31	2	(22)	-95578.3	1	10624
	K.QQNCQGGFSSTQDTVVALHALSR.Y		3		835.4075	2503.2008	2503.1874	5.33	0	96	417069	1	10915
	K.VYDYYETDEFAVAEYSAPCSK.D		2		836.3622	2506.0647	2506.0522	4.99	0	(15)	-65167	1	10927
	K.VYDYYETDEFAVAEYSAPCSK.D		1		1254.0400	2506.0655	2506.0522	5.31	0	31	134679	1	10928
	K.IQEEGTEVELTGKGATEITTTITK.L		3		850.4498	2548.3277	2548.3120	6.17	1	19	82544.9	1	11190
	K.NEESLVFVQTDKPIYKPEQTVK.F		2		648.8480	2591.3630	2591.3483	5.68	0	(24)	-104267	1	11342
	K.NEESLVFVQTDKPIYKPEQTVK.F		2		864.7952	2591.3639	2591.3483	6.02	0	44	191157	1	11343
	R.SGTHTLPVEQGDMQGHFSMSVPVESDIAPVAR.L		1		1127.2112	3378.6117	3378.5973	4.26	0	(18)	-78200.4	1	12765
	R.SGTHTLPVEQGDMQGHFSMSVPVESDIAPVAR.L		2		845.6619	3378.6184	3378.5973	6.24	0	25	108612	1	12766
	K.DLSSFPSSVNQQEEDNEDCISHDNVYINGI->M<-YFPVSNTNEK.D		1	Oxidation (M)	1584.7086	4751.1040	4751.0552	10.3	0	8	34755.8	1	14155
	Peptide	Unique	Matches	Modification	Observed	Mr(expt)	Mr(calc)	ppm	Miss	Score	#VALUE!	Rank	Query
	K.INVEVR.G		2		365.2181	728.4216	728.4181	4.85	0	57	247635	1	54
	K.ILQVER.E		2		379.2346	756.4547	756.4494	7.11	0	43	186812	1	122
	R.TRGQVGLAR.A		1		479.2856	956.5565	956.5516	5.22	1	28	121645	1	1192
	K.LNLKTESR.A		1		480.7801	959.5456	959.5400	5.84	1	45	195501	1	1217
	R.QGSFQGGFR.S		2		492.2409	982.4673	982.4621	5.26	0	47	204190	1	1364
	K.LELNVDSSK.A		1		502.7686	1003.5227	1003.5186	4.16	0	59	256324	1	1500
	K.AYRPGDTVK.L		2		503.7723	1005.5301	1005.5243	5.76	0	20	86889.4	1	1502
	K.AEFQGVLEK.L		1		510.7741	1019.5337	1019.5287	4.83	0	44	191157	1	1588
	K.VDFSLSSDR.D		2		513.2520	1024.4895	1024.4825	6.76	0	46	199846	1	1627
	K.SHKPLDMVK.V		1		352.1963	1053.5670	1053.5641	2.80	0	23	99922.8	1	1815
	K.SHKPLDMVK.V		1		527.7915	1053.5684	1053.5641	4.14	0	(12)	-52133.6	1	1816
	K.LGQYTSPVAK.R		2		532.2958	1062.5771	1062.5710	5.81	0	58	251979	1	1882
	R.FGLLGEDGEK.T		4		532.7706	1063.5266	1063.5186	7.53	0	70	304113	1	1886
	K.YVLPNFEVK.I		4		554.8076	1107.6007	1107.5964	3.84	0	51	221568	1	2169
	R.LLLFSPSVVR.I		3		565.8534	1129.6922	1129.6859	5.58	0	34	147712	1	2404
	R.YRVFALDQK.M		2		380.5472	1138.6197	1138.6135	5.47	1	(30)	-130334	1	2502
	R.YRVFALDQK.M		3		570.3173	1138.6201	1138.6135	5.80	1	47	204190	1	2503
	K.TTGLCVATPAR.L		3		573.8044	1145.5942	1145.5863	6.90	0	65	282390	1	2553
	K.AAGLAFSDGDHR.T		2		406.1975	1215.5708	1215.5632	6.21	0	(49)	-212879	1	3280
	K.AAGLAFSDGDHR.T		1		608.7927	1215.5709	1215.5632	6.29	0	74	321491	1	3281
	K.KYVLPNFEVK.I		1		618.8547	1235.6949	1235.6914	2.86	1	4	17377.9	1	3430
	R.DMSGSPASGIPVK.V	U	4		623.3142	1244.6137	1244.6071	5.35	0	70	304113	1	3501
	R.D->M<-SGSPASGIPVK.V	U	4	Oxidation (M)	631.3120	1260.6093	1260.6020	5.82	0	(27)	-117301	1	3714
	R.FVSSPFSLDLSK.T	U	2		663.8542	1325.6938	1325.6867	5.36	0	19	82544.9	1	4443
	K.VEEVDRFSQLR.L		2		689.3634	1376.7122	1376.7048	5.40	1	39	169434	1	4786
	K.VEEVDRFSQLR.L		2		459.9117	1376.7133	1376.7048	6.16	1	(28)	-121645	1	4787
	R.LEEELQFSLGSK.I		3		690.3600	1378.7054	1378.6980	5.40	0	35	152056	1	4817
	R.NPSHVNELCSPK.V		2		691.3326	1380.6507	1380.6456	3.73	0	53	230257	1	4829
	R.NPSHVNELCSPK.V		1		461.2243	1380.6510	1380.6456	3.91	0	(26)	-112956	1	4830
	K.LVDGQCQISLQK.A		3		694.8673	1387.7201	1387.7130	5.13	0	86	373624	1	4917
	K.AELADQAASWLTR.Q		2		716.3688	1430.7231	1430.7154	5.43	0	22	95578.3	1	5323
	R.FGLLGEDGEKTFLR.G		2		791.4191	1580.8236	1580.8199	2.36	1	(58)	-251979	1	6624
	R.FGLLGEDGEKTFLR.G		3		527.9497	1580.8273	1580.8199	4.71	1	65	282390	1	6627
	K.QTDMQGVNLLFSSR.R		3		798.4003	1594.7860	1594.7773	5.42	0	75	325835	1	6784
	K.QTDMQGVNLLFSSR.R		2		532.6032	1594.7876	1594.7773	6.44	0	(17)	-73856	1	6787
	K.QTD->M<-QGVNLLFSSR.R		2	Oxidation (M)	806.3978	1610.7811	1610.7723	5.49	0	(38)	-165090	1	6895
	R.ALVALGAVDTALYAVGGK.S		1		844.9884	1687.9622	1687.9509	6.74	0	42	182468	1	7424
	R.ALVALGAVDTALYAVGGK.S		1		563.6614	1687.9625	1687.9509	6.89	0	(35)	-152056	1	7425
	K.AAGLAFSDGDHRTEIR.K		2		572.6237	1714.8492	1714.8387	6.10	1	35	152056	1	7601
	K.AAGLAFSDGDHRTEIR.K		1		858.4334	1714.8523	1714.8387	7.92	1	(12)	-52133.6	1	7603
	K.AAGLAFSDGDHRTEIRK.S		2		615.3226	1842.9461	1842.9336	6.74	2	26	112956	1	8153
	R.AMELLQEEDLIEEDDIPVR.S		2		753.0388	2256.0946	2256.0831	5.11	0	(72)	-312802	1	10157
	R.AMELLQEEDLIEEDDIPVR.S		2		1129.0548	2256.0951	2256.0831	5.31	0	122	530025	1	10159
	R.A->M<-ELLQEEDLIEEDDIPVR.S		3	Oxidation (M)	1137.0523	2272.0899	2272.0780	5.25	0	(107)	-464858	1	10251
	K.NRDFEQNTDGSGQVIVSIGVPR.T	U	3		796.7394	2387.1965	2387.1830	5.67	1	33	143367	1	10612
	K.VDFSLSSDRDFILLNVPIPQEQAR.V	U	1		920.4861	2758.4364	2758.4290	2.69	1	3	13033.4	1	11938
Q5EA67	Inter-alpha (Globulin) inhibitor H4 (Plasma Kallikrein-sensitive glycoprotein) OS=Bos taurus GN=ITIH4 PE=2 SV=1	101617	1543	114(60)	29(22)	1.67	31%	Q5EA67_uniprot		0.00112186	4.87388	-0.238	6.25
	Peptide	Unique	Matches	Modification	Observed	Mr(expt)	Mr(calc)	ppm	Miss	Score	#VALUE!	Rank	Query
	R.LCVDLR.R		3		388.2132	774.4118	774.4058	7.72	0	57	247635	1	190
	R.VYLGPMR.F		3		418.2313	834.4480	834.4422	7.00	0	36	156401	1	522
	R.VYLGP->M<-R.F		12	Oxidation (M)	426.2284	850.4422	850.4371	5.96	0	(29)	-125990	1	733
	K.GSELVVAGK.L		1		430.2487	858.4828	858.4811	1.97	0	57	247635	1	747
	R.FGHSVGDR.T		3		437.7148	873.4151	873.4093	6.64	0	38	165090	1	819
	K.NVIFVIDK.S		4		474.2845	946.5545	946.5488	6.04	0	21	91233.8	1	1149
	K.VRPQQLVK.H		2		484.3084	966.6023	966.5974	4.99	0	36	156401	1	1275
	R.VVNKADAVR.E		1		486.2881	970.5616	970.5560	5.77	1	24	104267	1	1293
	R.LLLQNTDR.F		3		486.7798	971.5450	971.5400	5.20	0	56	243290	1	1297
	K.MALENGGLAR.R		3		516.2714	1030.5283	1030.5229	5.20	0	58	251979	1	1674
	R.FAHTVITSR.V		1		516.2882	1030.5619	1030.5560	5.71	0	13	56478.1	1	1680
	K.EISCWSVEL.-		2		561.7635	1121.5124	1121.5063	5.46	0	2	8688.94	1	2320
	K.LDYQESPPGK.E		1		567.2804	1132.5462	1132.5400	5.48	0	47	204190	1	2431
	R.HLGAYELLLK.V		1		578.8429	1155.6712	1155.6652	5.27	0	41	178123	1	2593
	R.EATFQMELPK.K		5		597.2997	1192.5849	1192.5798	4.31	0	62	269357	1	3000
	R.FKPTLSQQQK.Y		1		402.2299	1203.6680	1203.6612	5.70	0	(6)	-26066.8	1	3161
	R.FKPTLSQQQK.Y		2		602.8419	1203.6692	1203.6612	6.65	0	51	221568	1	3163
	R.EATFQ->M<-ELPK.K		3	Oxidation (M)	605.2977	1208.5809	1208.5747	5.13	0	(37)	-160745	1	3209
	K.ETLYSVMPGLK.V		3		619.3316	1236.6486	1236.6424	5.06	0	42	182468	1	3442
	K.ETLYSV->M<-PGLK.V		1	Oxidation (M)	627.3284	1252.6422	1252.6373	3.89	0	(14)	-60822.6	1	3630
	K.EGLLLLSRPDR.V		2		634.8733	1267.7320	1267.7248	5.70	0	(29)	-125990	1	3791
	K.EGLLLLSRPDR.V		2		423.5847	1267.7323	1267.7248	5.94	0	29	125990	1	3793
	R.EATFQMELPKK.A		2		661.3484	1320.6823	1320.6747	5.76	1	46	199846	1	4406
	R.EATFQMELPKK.A		2		441.2350	1320.6831	1320.6747	6.36	1	(31)	-134679	1	4408
	K.AAAQEQYSAAVAR.G		2		668.3381	1334.6616	1334.6578	2.81	0	81	351902	1	4461
	K.QDTVLDGSFIVR.Y	U	8		675.3594	1348.7042	1348.6987	4.08	0	74	321491	1	4626
	R.VTIGLLFWDGPGK.G		1		701.8948	1401.7750	1401.7657	6.67	0	59	256324	1	5080
	R.ELKLDYQESPPGK.E		2		501.9306	1502.7701	1502.7616	5.60	1	(18)	-78200.4	1	6033
	R.ELKLDYQESPPGK.E		4		752.3929	1502.7713	1502.7616	6.45	1	80	347558	1	6035
	K.VTFELVYEELLAR.H		2		527.9598	1580.8577	1580.8450	8.04	0	(45)	-195501	1	6638
	K.VTFELVYEELLAR.H		8		791.4364	1580.8582	1580.8450	8.39	0	69	299768	1	6639
	K.EKAAAQEQYSAAVAR.G		1		796.9114	1591.8083	1591.7954	8.13	1	17	73856	1	6732
	K.VQNDIDIYSLTVDSK.V		2		855.4368	1708.8590	1708.8519	4.12	0	116	503958	1	7561
	K.VQNDIDIYSLTVDSK.V		1		570.6272	1708.8598	1708.8519	4.58	0	(16)	-69511.5	1	7563
	K.YPEKQDTVLDGSFIVR.Y	U	5		933.9885	1865.9625	1865.9523	5.45	1	93	404036	1	8316
	K.YPEKQDTVLDGSFIVR.Y	U	6		622.9949	1865.9628	1865.9523	5.60	1	(75)	-325835	1	8318
	R.ELKLDYQESPPGKEISCWSVEL.-		1		869.7645	2606.2716	2606.2574	5.45	2	0	0	1	11387
	R.RPQELVNLLSDPDQGVEVTGHFETAK.A		4		720.6226	2878.4614	2878.4461	5.30	0	(46)	-199846	1	12155
	R.RPQELVNLLSDPDQGVEVTGHFETAK.A		3		960.4951	2878.4635	2878.4461	6.05	0	81	351902	1	12158
	K.ANQEELLPEGSITLIILLTDGDPTVGETNPSNIQK.N	U	1		930.7416	3718.9375	3718.9153	5.97	0	10	43444.7	1	13200
B0JYN6	Alpha-2-HS-glycoprotein OS=Bos taurus GN=AHSG PE=2 SV=1	39193	1498	78(48)	15(13)	5.45	42%	B0JYN6_uniprot		0.00199015	8.64615	-0.432	5.95
P12763	Alpha-2-HS-glycoprotein OS=Bos taurus GN=AHSG PE=1 SV=2	39193	1498	78(48)	15(13)		42%	P12763_uniprot			0
	Peptide	Unique	Matches	Modification	Observed	Mr(expt)	Mr(calc)	ppm	Miss	Score	#VALUE!	Rank	Query
	R.IRYFK.I	U	3		363.7204	725.4262	725.4224	5.19	1	21	91233.8	1	44
	R.AHYDLR.H	U	6		387.7004	773.3861	773.3820	5.34	0	33	143367	1	183
	K.QYGFCK.G	U	2		401.6834	801.3523	801.3480	5.37	0	19	82544.9	1	378
	K.ALGGEDVR.V	U	1		408.7166	815.4186	815.4137	5.99	0	55	238946	1	452
	K.CNLLAEK.Q	U	2		424.2244	846.4343	846.4269	8.74	0	43	186812	1	674
	K.HTLNQIDSVK.V	U	1		385.5448	1153.6127	1153.6091	3.06	0	(26)	-112956	1	2572
	K.HTLNQIDSVK.V	U	7		577.8160	1153.6174	1153.6091	7.17	0	71	308457	1	2579
	K->.<-QDGQFSVLFTK.C	U	6	Gln->pyro-Glu (N-term Q)	626.8173	1251.6201	1251.6136	5.19	0	(55)	-238946	1	3611
	K.QDGQFSVLFTK.C	U	13		635.3306	1268.6466	1268.6401	5.10	0	80	347558	1	3805
	K.CDSSPDSAEDVR.K	U	1		669.2713	1336.5280	1336.5201	5.93	0	57	247635	1	4470
	K.CDSSPDSAEDVRK.L	U	1		733.3187	1464.6229	1464.6151	5.34	1	65	282390	1	5628
	K.CDSSPDSAEDVRK.L	U	1		489.2150	1464.6232	1464.6151	5.52	1	(47)	-204190	1	5629
	K.TPIVGQPSIPGGPVR.L	U	4		737.9270	1473.8394	1473.8304	6.15	0	77	334524	1	5771
	K.TPIVGQPSIPGGPVR.L	U	3		492.2880	1473.8422	1473.8304	8.04	0	(24)	-104267	1	5776
	R.GYKHTLNQIDSVK.V	U	1		376.4566	1501.7974	1501.7889	5.68	1	(8)	-34755.8	1	6025
	R.GYKHTLNQIDSVK.V	U	2		501.6069	1501.7989	1501.7889	6.65	1	44	191157	1	6028
	K.EVVDPTKCNLLAEK.Q	U	3		808.4258	1614.8371	1614.8287	5.23	1	82	356246	1	6922
	K.EVVDPTKCNLLAEK.Q	U	4		539.2866	1614.8379	1614.8287	5.67	1	(46)	-199846	1	6923
	R->.<-QQTQHAVEGDCDIHVLK.Q	U	2	Gln->pyro-Glu (N-term Q)	654.3138	1959.9195	1959.9109	4.39	0	110	477892	1	8850
	R->.<-QQTQHAVEGDCDIHVLK.Q	U	1	Gln->pyro-Glu (N-term Q)	980.9677	1959.9207	1959.9109	5.02	0	(57)	-247635	1	8852
	R.QQTQHAVEGDCDIHVLK.Q	U	2		989.4796	1976.9447	1976.9374	3.66	0	(48)	-208535	1	8927
	R.QQTQHAVEGDCDIHVLK.Q	U	3		659.9891	1976.9456	1976.9374	4.12	0	(48)	-208535	1	8929
	R.QQTQHAVEGDCDIHVLK.Q	U	3		495.2446	1976.9493	1976.9374	6.00	0	(24)	-104267	1	8932
	R.HTFSGVASVESSSGEAFHVGK.T	U	2		707.3447	2119.0122	2118.9971	7.13	0	32	139023	1	9584
	K.EPACDDPDTEQAALAAVDYINK.H	U	2		802.7017	2405.0832	2405.0693	5.78	0	(55)	-238946	1	10666
	K.EPACDDPDTEQAALAAVDYINK.H	U	2		1203.5491	2405.0836	2405.0693	5.96	0	59	256324	1	10668
F1MY85	Complement C5a anaphylatoxin OS=Bos taurus GN=C5 PE=4 SV=2	190751	1212	101(47)	50(30)	0.81	31%	F1MY85_uniprot		0.000529486	2.30034	-0.257	6.06
	Peptide	Unique	Matches	Modification	Observed	Mr(expt)	Mr(calc)	ppm	Miss	Score	#VALUE!	Rank	Query
	R.LNMDVK.V	U	1		360.1930	718.3714	718.3683	4.21	0	16	69511.5	1	25
	R.YFYNK.V	U	2		367.6811	733.3476	733.3435	5.62	0	12	52133.6	1	65
	K.GNPPIYR.F	U	1		408.7246	815.4346	815.4290	6.91	0	21	91233.8	1	454
	K.IVHFGTR.D	U	1		415.2399	828.4652	828.4606	5.57	0	24	104267	1	505
	K.QYLIMGK.E	U	2		426.7392	851.4638	851.4575	7.47	0	29	125990	1	745
	K.YVLSPYK.L	U	2		435.2448	868.4750	868.4694	6.41	0	37	160745	1	782
	R.VVPEGVKR.E	U	1		442.2741	882.5337	882.5287	5.63	1	29	125990	1	878
	K.YGVWTIR.A	U	3		447.7478	893.4810	893.4759	5.72	0	24	104267	1	888
	R.IVACASYK.L	U	1		456.2385	910.4625	910.4582	4.71	0	55	238946	1	986
	R.IPLNMVPK.T	U	3		456.2751	910.5357	910.5310	5.16	0	30	130334	1	992
	R.DAEITFIK.K	U	1		468.7577	935.5008	935.4964	4.69	0	35	152056	1	1080
	K.WLSEEQR.Y	U	3		474.2357	946.4568	946.4508	6.35	0	30	130334	1	1146
	R.IQAGPICIK.A	U	3		500.2900	998.5655	998.5583	7.27	0	35	152056	1	1478
	R.DAEITFIKK.T	U	2		532.8063	1063.5980	1063.5913	6.25	1	39	169434	1	1888
	K.CQLENGSFK.E	U	1		541.7537	1081.4928	1081.4862	6.04	0	6	26066.8	1	1944
	K.LQGTLPVEAR.E	U	2		542.3144	1082.6142	1082.6084	5.39	0	64	278046	1	1963
	K.IEEEAAKYR.N	U	1		554.7876	1107.5606	1107.5560	4.21	1	13	56478.1	1	2161
	K.NKGDLYHYK.M	U	1		379.8630	1136.5671	1136.5614	5.00	1	13	56478.1	1	2479
	R.DSFVPNTGTAR.M	U	2		582.7895	1163.5645	1163.5571	6.39	0	48	208535	1	2678
	K.EGMVSI->M<-SFR.N	U	1	Oxidation (M)	586.7702	1171.5258	1171.5366	-9.14	0	3	13033.4	1	2803
	K.DMNYVNPVIK.W	U	2		596.8083	1191.6020	1191.5958	5.24	0	39	169434	1	2994
	K.SCCAIASQFR.A	U	2		600.2729	1198.5312	1198.5223	7.44	0	17	73856	1	3082
	K.YTATLLDIYK.A	U	1		600.8325	1199.6504	1199.6438	5.50	0	9	39100.2	1	3102
	R.FWKDDLQQR.D	U	2		618.3154	1234.6163	1234.6095	5.54	1	(38)	-165090	1	3420
	R.FWKDDLQQR.D	U	2		412.5464	1234.6173	1234.6095	6.31	1	54	234601	1	3422
	K.SLLPVTKPEIR.S	U	2		626.8886	1251.7625	1251.7551	5.99	0	24	104267	1	3624
	K.DFTNFEITIR.A	U	2		628.3225	1254.6303	1254.6245	4.70	0	14	60822.6	1	3647
	R.NADYSYSMWK.G	U	2		632.7722	1263.5298	1263.5230	5.36	0	39	169434	1	3744
	K.FQNSATLTIQPK.Q	U	2		674.3709	1346.7273	1346.7194	5.84	0	47	204190	1	4603
	R.VYSLNDDLKPAK.R	U	1		454.9153	1361.7240	1361.7191	3.64	0	(12)	-52133.6	1	4754
	R.VYSLNDDLKPAK.R	U	2		681.8707	1361.7268	1361.7191	5.68	0	40	173779	1	4755
	R.EIEAFGYSSSEYK.R	U	2		755.3451	1508.6756	1508.6671	5.67	0	15	65167	1	6070
	R.VYSLNDDLKPAKR.E	U	1		380.4647	1517.8298	1517.8202	6.34	1	27	117301	1	6093
	R.VYSLNDDLKPAKR.E	U	2		506.9508	1517.8306	1517.8202	6.88	1	(26)	-112956	1	6095
	K.ISTSEEVCSFHLK.I	U	2		768.8761	1535.7376	1535.7290	5.64	0	70	304113	1	6210
	K.ISTSEEVCSFHLK.I	U	2		512.9203	1535.7392	1535.7290	6.66	0	(36)	-156401	1	6212
	K.VEIVAVTEENAFVK.Y	U	3		774.4227	1546.8309	1546.8243	4.29	0	40	173779	1	6330
	K.ELSYESLEDLNNK.Y	U	2		777.3737	1552.7328	1552.7256	4.60	0	86	373624	1	6393
	R.QSSVSHVYLEVTSK.H	U	2		782.4094	1562.8042	1562.7940	6.48	0	58	251979	1	6474
	K.TLDANQEITDLESK.K	U	3		788.8936	1575.7727	1575.7628	6.29	0	105	456169	1	6593
	R.GEQVQLSGTVYNYR.T	U	3		807.4037	1612.7929	1612.7845	5.22	0	61	265013	1	6907
	R.DNLEDNQKEMMQK.A	U	1		811.8647	1621.7149	1621.7076	4.55	1	21	91233.8	1	6983
	R.EIEAFGYSSSEYKR.I	U	2		555.9320	1664.7740	1664.7682	3.51	1	(27)	-117301	1	7298
	R.EIEAFGYSSSEYKR.I	U	2		833.3959	1664.7772	1664.7682	5.42	1	27	117301	1	7300
	K.AGEAAAERDAEITFIK.K	U	2		564.6284	1690.8633	1690.8526	6.32	1	9	39100.2	1	7445
	K.TLDANQEITDLESKK.S	U	2		852.9402	1703.8658	1703.8577	4.75	1	101	438791	1	7521
	K.TLDANQEITDLESKK.S	U	3		568.9629	1703.8668	1703.8577	5.35	1	(66)	-286735	1	7522
	K.AGEAAAERDAEITFIKK.T	U	1		607.3273	1818.9600	1818.9475	6.85	2	10	43444.7	1	8075
	K.TEDLDLPEENQASEDYR.A	U	1		675.2991	2022.8756	2022.8654	5.03	0	(19)	-82544.9	1	9160
	K.TEDLDLPEENQASEDYR.A	U	2		1012.4458	2022.8770	2022.8654	5.76	0	78	338869	1	9161
	K.CQLENGSFKENSDYQPVK.L	U	1		715.0005	2141.9796	2141.9688	5.08	1	13	56478.1	1	9710
	K.CGNQLEVHLSPETDAYSPGQR.V	U	2		786.7010	2357.0811	2357.0706	4.46	0	72	312802	1	10523
	R.DNAEVFYLAGLTFLTNANADDTR.E	U	1		1266.1082	2530.2017	2530.1976	1.64	0	13	56478.1	1	11072
	R.DNAEVFYLAGLTFLTNANADDTR.E	U	1		844.4113	2530.2119	2530.1976	5.67	0	(5)	-21722.3	1	11073
	R.DKLSDSAYQSINIPVTQDMVPSAR.L	U	1		879.1113	2634.3122	2634.2959	6.17	1	16	69511.5	1	11505
	K.LSSEESSSGSSHAVMDISLPTGVNANPEDLK.A	U	1		1053.5033	3157.4881	3157.4721	5.06	0	5	21722.3	1	12506
	R.DNAEVFYLAGLTFLTNANADDTRENDEPCK.E	U	1		1135.1841	3402.5304	3402.5310	-0.17	1	1	4344.47	1	12805
	R.ETVLTFIDPEGSEVDMVEENDYTGIISFPDFK.I	U	1		1212.9125	3635.7156	3635.6753	11.1	0	41	178123	1	13053
P34955	Alpha-1-antiproteinase OS=Bos taurus GN=SERPINA1 PE=1 SV=1	46417	1200	80(42)	20(15)	2.95	37%	P34955_uniprot		0.00172351	7.48772	-0.056	6.05
	Peptide	Unique	Matches	Modification	Observed	Mr(expt)	Mr(calc)	ppm	Miss	Score	#VALUE!	Rank	Query
	K.IVELVK.V		5		350.7358	699.4569	699.4531	5.55	0	33	143367	1	6
	K.VPMMNR.L	U	1		374.1879	746.3612	746.3567	6.05	0	24	104267	1	81
	K.SPLFVGK.V	U	4		374.2258	746.4370	746.4327	5.77	0	38	165090	1	88
	R.ADLSGITK.E	U	1		402.7280	803.4414	803.4389	3.20	0	29	125990	1	387
	K.AALTIDEK.G	U	1		430.7421	859.4696	859.4651	5.32	0	54	234601	1	748
	K.INDYVEK.G	U	1		440.7265	879.4384	879.4338	5.31	0	23	99922.8	1	848
	K.LNNELLAK.F	U	2		457.7720	913.5294	913.5232	6.80	0	37	160745	1	1013
	K.KINDYVEK.G	U	1		504.7742	1007.5339	1007.5287	5.14	1	52	225912	1	1504
	K.GNTHTEILK.G	U	1		506.7771	1011.5397	1011.5349	4.76	0	33	143367	1	1523
	K.WEKPFEMK.H	U	1		547.7739	1093.5333	1093.5266	6.11	0	19	82544.9	1	2070
	K.LSISETYDLK.S	U	16		584.8126	1167.6106	1167.6023	7.09	0	74	321491	1	2767
	K.LVDTFLEDVK.N	U	3		589.8214	1177.6281	1177.6231	4.32	0	77	334524	1	2858
	K.YASSANLHLPK.L	U	2		400.8852	1199.6337	1199.6298	3.26	0	(16)	-69511.5	1	3097
	K.YASSANLHLPK.L	U	2		600.8260	1199.6374	1199.6298	6.33	0	35	152056	1	3100
	R.DFHVDEQTTVK.V	U	2		440.2165	1317.6277	1317.6201	5.78	0	42	182468	1	4364
	R.DFHVDEQTTVK.V	U	3		659.8215	1317.6284	1317.6201	6.28	0	(40)	-173779	1	4365
	K.INDYVEKGSHGK.I	U	1		449.5641	1345.6705	1345.6626	5.88	1	15	65167	1	4591
	K.INDYVEKGSHGK.I	U	1		673.8427	1345.6709	1345.6626	6.13	1	(1)	-4344.47	1	4592
	K.SVLGDVGITEVFSDR.A	U	2		531.9449	1592.8130	1592.8046	5.27	0	(60)	-260668	1	6742
	K.SVLGDVGITEVFSDR.A	U	18		797.4141	1592.8137	1592.8046	5.69	0	111	482236	1	6749
	K.LQQLEDKLNNELLAK.F	U	1		884.9986	1767.9826	1767.9730	5.45	1	28	121645	1	7863
	K.LQQLEDKLNNELLAK.F	U	1		590.3351	1767.9834	1767.9730	5.89	1	(26)	-112956	1	7864
	R.DFHVDEQTTVKVPMMNR.L	U	1		682.9999	2045.9780	2045.9663	5.72	1	(23)	-99922.8	1	9261
	R.DFHVDEQTTVKVPMMNR.L	U	4		512.5023	2045.9799	2045.9663	6.67	1	34	147712	1	9263
	R.DFHVDEQTTVKVPMMNR.L	U	1		1023.9979	2045.9812	2045.9663	7.27	1	(7)	-30411.3	1	9265
	K.NLYHSEAFSINFRDAEEAK.K	U	1		747.6926	2240.0561	2240.0498	2.81	1	5	21722.3	1	10076
	K.SVLGDVGITEVFSDRADLSGITK.E	U	1		1190.1287	2378.2428	2378.2329	4.13	1	(20)	-86889.4	1	10591
	K.SVLGDVGITEVFSDRADLSGITK.E	U	2		793.7563	2378.2470	2378.2329	5.93	1	50	217223	1	10592
K4JF16	Alpha-2-macroglobulin variant 23 OS=Bos taurus GN=A2M PE=2 SV=1	102208	984	96(48)	37(29)	1.92	46%	K4JF16_uniprot		0.000939261	4.08059	-0.203	5.68
	Peptide	Unique	Matches	Modification	Observed	Mr(expt)	Mr(calc)	ppm	Miss	Score	#VALUE!	Rank	Query
	R.GIPFTGK.V		3		360.2101	718.4056	718.4014	5.88	0	28	121645	1	28
	K.GTSLSIR.V		1		367.2154	732.4162	732.4130	4.42	0	28	121645	1	61
	K.VLLVDGK.G		1		372.2382	742.4618	742.4589	3.95	0	30	130334	1	72
	R.GEAFTLK.A		3		383.2123	764.4100	764.4068	4.14	0	38	165090	1	162
	K.FEVQVR.M		1		389.2184	776.4223	776.4181	5.46	0	31	134679	1	196
	K.AGALCLSR.D		2		424.2296	846.4446	846.4382	7.62	0	61	265013	1	677
	R.DLKPAIVK.V		2		442.2868	882.5591	882.5538	5.98	0	32	139023	1	879
	R.VTMNMCR.K		1		456.2003	910.3860	910.3823	4.02	0	46	199846	1	985
	R.VT->M<-N->M<-CR.K		1	2 Oxidation (M)	472.1921	942.3697	942.3721	-2.63	0	(1)	-4344.47	1	1102
	K.RQEFEMK.I		1		484.2399	966.4652	966.4593	6.18	1	27	117301	1	1266
	K.IKGTSLSIR.V		1		487.8061	973.5976	973.5920	5.77	1	16	69511.5	1	1309
	K.ATVLNYLPK.C		3		509.8029	1017.5912	1017.5859	5.22	0	23	99922.8	1	1578
	R.SLFTDVVAEK.D		2		554.8008	1107.5871	1107.5812	5.36	0	(64)	-278046	1	2163
	K.GATEITTTITK.L		3		568.3161	1134.6176	1134.6132	3.90	0	56	243290	1	2445
	K.LSFVTVDSNLR.R		2		625.8433	1249.6720	1249.6667	4.25	0	54	234601	1	3588
	R.DTGLGLSPTASLR.V		4		644.3522	1286.6898	1286.6830	5.25	0	61	265013	1	3975
	K.TQTVQAHYVLK.G		2		644.3606	1286.7066	1286.6983	6.50	0	60	260668	1	3983
	R.YEVEHCLDNK.V		1		436.1977	1305.5712	1305.5659	4.00	0	21	91233.8	1	4198
	R.YEVEHCLDNK.V		1		653.7933	1305.5721	1305.5659	4.73	0	(9)	-39100.2	1	4199
	R.IQHHTLLASPVR.A		2		457.9363	1370.7870	1370.7783	6.39	0	10	43444.7	1	4777
	K.LSFVTVDSNLRR.G		1		469.6000	1405.7781	1405.7678	7.36	1	25	108612	1	5119
	R.SNSFVYLEPLPR.E		3		711.3790	1420.7434	1420.7350	5.87	0	58	251979	1	5263
	K.IQEEGTEVELTGK.G		3		716.8664	1431.7182	1431.7093	6.24	0	73	317146	1	5329
	R.TEVSNNHVLIYLDK.V		1		822.9335	822.9335	1643.8525	0.39	0	(0)	0	2	7190
	R.TEVSNNHVLIYLDK.V		1		548.9616	1643.8630	1643.8519	6.77	0	40	173779	1	7191
	R.SPTSQEVMFLTIQVK.G		2		854.4576	1706.9006	1706.8913	5.45	0	65	282390	1	7547
	R.SPTSQEV->M<-FLTIQVK.G		1	Oxidation (M)	862.4545	1722.8945	1722.8862	4.80	0	(3)	-13033.4	1	7647
	R.NPSNCYGEESNAVCEK.F		1		929.3775	1856.7404	1856.7305	5.36	0	17	73856	1	8263
	R.LLIYAILPDGEVVGDSAR.Y		2		951.0268	1900.0390	1900.0306	4.46	0	74	321491	1	8488
	R.LLIYAILPDGEVVGDSAR.Y		2		634.3556	1900.0449	1900.0306	7.57	0	(47)	-204190	1	8490
	R.DFVHFDDTSEPPTETVR.K		3		996.4598	1990.9051	1990.8909	7.15	0	47	204190	1	8992
	R.DFVHFDDTSEPPTETVR.K		4		664.6431	1990.9076	1990.8909	8.38	0	(47)	-204190	1	8995
	K.GSGGTAEHPFTVEEFVLPK.F		2		1001.5055	2000.9964	2000.9844	6.02	0	24	104267	1	9041
	K.FSGQLNNEGCFSQQVNTK.I		2		1029.4744	2056.9342	2056.9273	3.37	0	45	195501	1	9304
	R.DFVHFDDTSEPPTETVRK.Y		1		707.3403	2118.9990	2118.9858	6.20	1	(4)	-17377.9	1	9579
	R.DFVHFDDTSEPPTETVRK.Y		2		530.7574	2119.0005	2118.9858	6.90	1	6	26066.8	1	9580
	K.YRNPSNCYGEESNAVCEK.F		1		726.3102	2175.9089	2175.8949	6.42	1	4	17377.9	1	9842
	R.NRDFVHFDDTSEPPTETVR.K		6		754.6904	2261.0493	2261.0349	6.36	1	62	269357	1	10200
	R.NRDFVHFDDTSEPPTETVR.K		1		1131.5321	2261.0496	2261.0349	6.52	1	(19)	-82544.9	1	10201
	R.NRDFVHFDDTSEPPTETVR.K		1		566.2708	2261.0539	2261.0349	8.40	1	(6)	-26066.8	1	10206
	R.NRDFVHFDDTSEPPTETVRK.Y		3		598.2929	2389.1423	2389.1299	5.20	2	23	99922.8	1	10621
	R.NRDFVHFDDTSEPPTETVRK.Y		2		797.3889	2389.1449	2389.1299	6.31	2	(22)	-95578.3	1	10624
	K.VYDYYETDEFAVAEYSAPCSK.D		2		836.3622	2506.0647	2506.0522	4.99	0	(15)	-65167	1	10927
	K.VYDYYETDEFAVAEYSAPCSK.D		1		1254.0400	2506.0655	2506.0522	5.31	0	31	134679	1	10928
	K.IQEEGTEVELTGKGATEITTTITK.L		3		850.4498	2548.3277	2548.3120	6.17	1	19	82544.9	1	11190
	K.NEESLVFVQTDKPIYKPEQTVK.F		2		648.8480	2591.3630	2591.3483	5.68	0	(24)	-104267	1	11342
	K.NEESLVFVQTDKPIYKPEQTVK.F		2		864.7952	2591.3639	2591.3483	6.02	0	44	191157	1	11343
	R.SGTHTLPVEQGDMQGHFSMSVPVESDIAPVAR.L		1		1127.2112	3378.6117	3378.5973	4.26	0	(18)	-78200.4	1	12765
	R.SGTHTLPVEQGDMQGHFSMSVPVESDIAPVAR.L		2		845.6619	3378.6184	3378.5973	6.24	0	25	108612	1	12766
	K.DLSSFPSSVNQQEEDNEDCISHDNVYINGI->M<-YFPVSNTNEK.D		1	Oxidation (M)	1584.7086	4751.1040	4751.0552	10.3	0	8	34755.8	1	14155
P81187	Complement factor B OS=Bos taurus GN=CFB PE=1 SV=2	86737	765	62(32)	27(17)	1.02	31%	P81187_uniprot		0.000714805	3.10545	-0.462	7.87
	Peptide	Unique	Matches	Modification	Observed	Mr(expt)	Mr(calc)	ppm	Miss	Score	#VALUE!	Rank	Query
	R.KAVYIK.N		2		361.2355	720.4565	720.4534	4.34	1	14	60822.6	1	32
	R.KEWEVK.E	U	2		409.7263	817.4380	817.4334	5.61	1	22	95578.3	1	464
	R.KVGSQYR.L	U	1		419.2344	836.4542	836.4504	4.51	1	39	169434	1	527
	R.YLLDIGR.N	U	4		425.2480	848.4814	848.4756	6.81	0	44	191157	1	698
	K.EILFHPK.Y	U	2		442.2578	882.5011	882.4963	5.44	0	21	91233.8	1	876
	K.VASYGVKPK.Y	U	1		474.7824	947.5501	947.5440	6.48	0	30	130334	1	1157
	K.DVSEVVTPR.F	U	3		501.2694	1000.5243	1000.5189	5.33	0	42	182468	1	1485
	R.CYDGYTLR.G	U	3		524.2347	1046.4548	1046.4491	5.43	0	64	278046	1	1728
	K.LQNEDLGFL.-	U	3		524.7725	1047.5305	1047.5237	6.51	0	19	82544.9	1	1751
	K.GDSGGPLIIHK.R	U	2		365.2070	1092.5992	1092.5928	5.87	0	(21)	-91233.8	1	2065
	K.GDSGGPLIIHK.R	U	1		547.3070	1092.5993	1092.5928	6.03	0	75	325835	1	2066
	R.DALRAPGYEK.V	U	1		373.8659	1118.5758	1118.5720	3.42	1	(17)	-73856	1	2292
	R.DALRAPGYEK.V	U	2		560.2961	1118.5776	1118.5720	5.02	1	50	217223	1	2294
	K.RPQQVPGYAR.D	U	1		586.3238	1170.6331	1170.6258	6.30	0	43	186812	1	2801
	K.NCLRDFIEK.V	U	2		597.8027	1193.5908	1193.5863	3.78	1	32	139023	1	3036
	K.NCLRDFIEK.V	U	1		398.8716	1193.5929	1193.5863	5.56	1	(12)	-52133.6	1	3039
	K.VKDVSEVVTPR.F	U	2		410.2366	1227.6879	1227.6823	4.54	1	60	260668	1	3327
	K.VKDVSEVVTPR.F	U	3		614.8518	1227.6889	1227.6823	5.41	1	(48)	-208535	1	3330
	K.DIEALFVSESK.K	U	3		619.3224	1236.6302	1236.6238	5.23	0	53	230257	1	3439
	K.YGLVTYATEPK.V	U	4		621.3273	1240.6401	1240.6339	4.97	0	62	269357	1	3473
	K.GDSGGPLIIHKR.S	U	1		417.2399	1248.6979	1248.6939	3.21	1	47	204190	1	3569
	K.GDSGGPLIIHKR.S	U	1		625.3573	1248.7000	1248.6939	4.95	1	(35)	-152056	1	3570
	K.EKLQNEDLGFL.-	U	3		653.3412	1304.6679	1304.6612	5.17	1	29	125990	1	4178
	R.ALLEVYNMMSR.E	U	1		663.8347	1325.6548	1325.6471	5.75	0	10	43444.7	1	4441
	K.DIEALFVSESKK.T	U	1		455.9154	1364.7243	1364.7187	4.08	1	15	65167	1	4771
	R.STGSWSTLQTQDR.K	U	3		733.8519	1465.6892	1465.6797	6.44	0	76	330180	1	5649
	K.DGTAYHKQPWQAK.I	U	1		510.5910	1528.7513	1528.7423	5.89	1	1	4344.47	1	6166
	R.AAYYNLSDEISFR.C	U	1		774.8741	1547.7337	1547.7256	5.27	0	2	8688.94	1	6345
	R.STGSWSTLQTQDRK.I	U	1		797.9002	1593.7857	1593.7747	6.93	1	60	260668	1	6778
	R.STGSWSTLQTQDRK.I	U	1		532.2694	1593.7864	1593.7747	7.34	1	(14)	-60822.6	1	6779
	K.GIPEFYDYDVALVR.L	U	2		828.9216	1655.8286	1655.8195	5.48	0	85	369280	1	7257
	K.GIPEFYDYDVALVR.L	U	1		552.9505	1655.8297	1655.8195	6.13	0	(2)	-8688.94	1	7258
	R.FLCTGGVDPYADPNTCK.G	U	1		957.9269	1913.8393	1913.8288	5.49	0	2	8688.94	1	8561
	K.LQGMENLEDVFVQMLDESR.T	U	1		751.6931	2252.0575	2252.0453	5.43	0	15	65167	1	10119
F1N1I6	Gelsolin OS=Bos taurus GN=GSN PE=4 SV=1	85976	627	54(29)	21(16)	1.03	24%	F1N1I6_uniprot		0.000628082	2.72868	-0.409	5.86
	Peptide	Unique	Matches	Modification	Observed	Mr(expt)	Mr(calc)	ppm	Miss	Score	#VALUE!	Rank	Query
	R.TPITVVK.Q	U	2		379.2465	756.4784	756.4745	5.05	0	30	130334	1	124
	R.AVEVMPK.A	U	1		387.2164	772.4183	772.4153	3.90	0	28	121645	1	180
	K.TASDFISK.M	U	2		434.7265	867.4384	867.4338	5.37	0	37	160745	1	769
	K.TGALELLR.V	U	4		436.7667	871.5188	871.5127	6.97	0	68	295424	1	805
	R.RTPITVVK.Q	U	2		457.2980	912.5815	912.5757	6.42	1	27	117301	1	1005
	K.EPGLQIWR.V	U	4		499.7776	997.5407	997.5345	6.20	0	41	178123	1	1469
	R.YIETDPANR.D	U	2		539.7645	1077.5145	1077.5091	5.05	0	33	143367	1	1926
	K.RYIETDPANR.D	U	1		617.8154	1233.6162	1233.6102	4.88	1	3	13033.4	1	3403
	K.AGKEPGLQIWR.V	U	2		418.9053	1253.6941	1253.6880	4.82	1	33	143367	1	3638
	K.AGKEPGLQIWR.V	U	1		627.8545	1253.6944	1253.6880	5.10	1	(25)	-108612	1	3640
	K.HVVPNEVVVQR.L	U	2		425.9124	1274.7152	1274.7095	4.46	0	(35)	-152056	1	3865
	K.HVVPNEVVVQR.L	U	3		638.3654	1274.7162	1274.7095	5.20	0	54	234601	1	3867
	R.LATPARPGATQAR.A	U	1		655.3733	1308.7321	1308.7262	4.54	0	(0)	0	1	4262
	R.LATPARPGATQAR.A	U	1		437.2517	1308.7333	1308.7262	5.42	0	21	91233.8	1	4263
	K.AGALNSNDAFVLK.T	U	3		660.3557	1318.6969	1318.6881	6.65	0	68	295424	1	4374
	R.SEDCFILDHGK.D	U	1		440.8711	1319.5914	1319.5816	7.46	0	31	134679	1	4384
	R.YIETDPANRDR.R	U	1		450.5549	1348.6429	1348.6371	4.27	1	(16)	-69511.5	1	4613
	R.YIETDPANRDR.R	U	2		675.3287	1348.6429	1348.6371	4.31	1	17	73856	1	4614
	R.SEDCFILDHGKDGK.I	U	2		810.8721	1619.7297	1619.7250	2.92	1	60	260668	1	6959
	R.SEDCFILDHGKDGK.I	U	2		540.9175	1619.7308	1619.7250	3.59	1	(47)	-204190	1	6961
	R.SEDCFILDHGKDGK.I	U	1		405.9410	1619.7348	1619.7250	6.08	1	(8)	-34755.8	1	6963
	K.DSQEEEKTEALTSAK.R	U	1		833.3984	1664.7822	1664.7740	4.90	1	(13)	-56478.1	1	7302
	K.DSQEEEKTEALTSAK.R	U	1		555.9355	1664.7846	1664.7740	6.36	1	29	125990	1	7303
	R.EVQGFESATFLGYFK.S	U	1		861.9284	1721.8423	1721.8301	7.07	0	65	282390	1	7641
	K.TPSAAYLWVGAGASEAEK.T	U	1		603.3026	1806.8858	1806.8788	3.89	0	(5)	-21722.3	1	8024
	K.TPSAAYLWVGAGASEAEK.T	U	3		904.4512	1806.8878	1806.8788	4.97	0	63	273702	1	8027
	K.DSQEEEKTEALTSAKR.Y	U	1		607.9688	1820.8846	1820.8752	5.19	2	14	60822.6	1	8080
	R.QTQVSVLPEGGETPLFK.Q	U	4		915.4902	1828.9659	1828.9571	4.82	0	42	182468	1	8105
	R.AQPVQVAEGSEPDSFWEALGGK.A	U	1		768.0419	2301.1040	2301.0913	5.49	0	48	208535	1	10369
	R.AQPVQVAEGSEPDSFWEALGGK.A	U	1		1151.5604	2301.1063	2301.0913	6.50	0	(11)	-47789.2	1	10370
F1MJK3	Uncharacterized protein OS=Bos taurus GN=LOC506828 PE=4 SV=2	166989	605	52(22)	26(11)		18%	F1MJK3_uniprot			0
	Peptide	Unique	Matches	Modification	Observed	Mr(expt)	Mr(calc)	ppm	Miss	Score	#VALUE!	Rank	Query
	R.YNILPK.K		3		374.2261	746.4377	746.4326	6.81	0	19	82544.9	1	89
	K.FEVQVK.M	U	2		375.2148	748.4151	748.4119	4.18	0	21	91233.8	1	95
	R.GEAFTLK.A		3		383.2123	764.4100	764.4068	4.14	0	38	165090	1	162
	K.YGAATFIK.G	U	1		435.7420	869.4694	869.4647	5.47	0	16	69511.5	1	788
	K.IFSMGYR.G	U	1		437.2203	872.4261	872.4214	5.36	0	8	34755.8	1	811
	K.NLKPATIK.A	U	1		442.7840	883.5534	883.5491	4.88	0	22	95578.3	1	883
	R.TVSWAVTPK.S	U	3		494.7797	987.5448	987.5389	5.90	0	27	117301	1	1400
	R.NLLTDLEAK.N	U	2		508.7877	1015.5609	1015.5549	5.85	0	40	173779	1	1560
	R.SGSLLNNAIK.G	U	1		508.7943	1015.5741	1015.5662	7.77	0	23	99922.8	1	1562
	R.NALFCLER.A	U	2		511.7600	1021.5054	1021.5015	3.85	0	28	121645	1	1599
	K.VPDTITEWK.A	U	1		544.7886	1087.5626	1087.5550	7.00	0	20	86889.4	1	2011
	K.LQEMAQIQR.T	U	1		558.7990	1115.5835	1115.5757	6.96	0	26	112956	1	2250
	K.LPSNVVEGSAR.A	U	1		564.8072	1127.5999	1127.5935	5.74	0	50	217223	1	2387
	K.RNELLESLHK.E	U	2		413.5695	1237.6866	1237.6778	7.04	1	25	108612	1	3454
	R.KLQEMAQIQR.T	U	2		622.8457	1243.6768	1243.6707	4.98	1	(12)	-52133.6	1	3494
	R.KLQEMAQIQR.T	U	1		415.5665	1243.6776	1243.6707	5.57	1	26	112956	1	3495
	R.KPQEVNELYSPHR.A	U	1		532.9452	1595.8139	1595.8056	5.23	0	28	121645	1	6796
	K.HSDGSYSTFGDRDGR.S	U	2		552.9077	1655.7013	1655.6924	5.35	1	8	34755.8	1	7248
	K.HSDGSYSTFGDRDGR.S	U	1		828.8588	1655.7030	1655.6924	6.36	1	(1)	-4344.47	1	7250
	R.IEHSFEVDEYVLPK.F	U	1		852.9324	1703.8503	1703.8406	5.68	0	63	273702	1	7517
	R.IEHSFEVDEYVLPK.F	U	2		568.9576	1703.8511	1703.8406	6.14	0	(43)	-186812	1	7519
	R.AWQSASEAQGSFVYTK.A	U	1		880.4226	1758.8307	1758.8213	5.32	0	44	191157	1	7810
	K.SAGTFSEEFQVDEAKR.L	U	2		900.9288	1799.8431	1799.8326	5.84	1	100	434447	1	7999
	K.SAGTFSEEFQVDEAKR.L	U	4		600.9562	1799.8467	1799.8326	7.84	1	(86)	-373624	1	8005
	K.RIEHSFEVDEYVLPK.F	U	1		620.9913	1859.9522	1859.9417	5.60	1	0	0	1	8276
	K.EAVKEEDSIHWQRPR.K	U	2		627.3228	1878.9464	1878.9336	6.81	1	12	52133.6	1	8381
	R.EEGTGLELTGHGSSEITNTLSK.L	U	1		754.0408	2259.1005	2259.0866	6.13	0	15	65167	1	10171
	K.QQNPNGGFSSTQDTVVALQALSK.Y	U	1		797.4078	2389.2017	2389.1874	5.99	0	15	65167	1	10630
	K.VREEGTGLELTGHGSSEITNTLSK.L	U	2		839.0972	2514.2697	2514.2562	5.38	1	(54)	-234601	1	10950
	K.VREEGTGLELTGHGSSEITNTLSK.L	U	3		629.5752	2514.2717	2514.2562	6.18	1	57	247635	1	10953
	K.SICEEFSQQADDEGCFTQLVNAK.S	U	1		892.7278	2675.1617	2675.1479	5.14	0	3	13033.4	1	11618
V6F9A2	Apolipoprotein A-I preproprotein OS=Bos taurus GN=APOA1 PE=4 SV=1	30258	599	68(29)	23(12)	7.03	63%	V6F9A2_uniprot		0.00224734	9.7635	-0.619	5.71
P15497	Apolipoprotein A-I OS=Bos taurus GN=APOA1 PE=1 SV=3	30258	599	68(29)	23(12)		63%	P15497_uniprot			0
	Peptide	Unique	Matches	Modification	Observed	Mr(expt)	Mr(calc)	ppm	Miss	Score	#VALUE!	Rank	Query
	R.AHVETLR.Q	U	2		413.2353	824.4560	824.4504	6.78	0	21	91233.8	1	491
	K.VAPLGEEFR.E	U	2		509.2747	1016.5348	1016.5291	5.59	0	47	204190	1	1570
	K.LSPLAQELR.D	U	3		513.8040	1025.5935	1025.5869	6.41	0	58	251979	1	1639
	R.ARAHVETLR.Q	U	1		351.5388	1051.5945	1051.5887	5.51	1	6	26066.8	1	1785
	R->.<-QKVQELQDK.L	U	1	Gln->pyro-Glu (N-term Q)	549.7964	1097.5782	1097.5717	5.96	1	(18)	-78200.4	1	2098
	R.QKVQELQDK.L	U	1		558.3095	1114.6045	1114.5982	5.60	1	25	108612	1	2241
	R.QGLLPVLESLK.V	U	2		598.8707	1195.7268	1195.7176	7.68	0	18	78200.4	1	3067
	K.EGGGSLAEYHAK.A	U	1		406.8649	1217.5730	1217.5676	4.37	0	(30)	-130334	1	3285
	K.EGGGSLAEYHAK.A	U	1		609.7941	1217.5737	1217.5676	4.98	0	53	230257	1	3286
	K.DFATVYVEAIK.D	U	1		628.3355	1254.6563	1254.6496	5.38	0	37	160745	1	3653
	K.WHEEVEIYR.Q	U	4		420.8737	1259.5994	1259.5935	4.73	0	(38)	-165090	1	3686
	K.WHEEVEIYR.Q	U	6		630.8075	1259.6004	1259.5935	5.55	0	42	182468	1	3689
	K.VQPYLDEFQK.K	U	3		633.8251	1265.6356	1265.6292	5.05	0	45	195501	1	3766
	R.QKVAPLGEEFR.E	U	1		637.3533	1272.6921	1272.6826	7.46	1	(19)	-82544.9	1	3851
	R.QKVAPLGEEFR.E	U	1		425.2382	1272.6927	1272.6826	7.88	1	29	125990	1	3852
	R->.<-QQLAPYSDDLR.Q	U	3	Gln->pyro-Glu (N-term Q)	644.8153	1287.6161	1287.6095	5.08	0	(39)	-169434	1	3987
	K.LSPLAQELRDR.A	U	1		649.3678	1296.7210	1296.7150	4.69	1	16	69511.5	1	4078
	K.LSPLAQELRDR.A	U	2		433.2487	1296.7242	1296.7150	7.15	1	(16)	-69511.5	1	4083
	R.QQLAPYSDDLR.Q	U	5		653.3289	1304.6432	1304.6361	5.45	0	66	286735	1	4171
	K.VSILAAIDEASKK.L	U	2		672.8936	1343.7727	1343.7660	4.98	1	16	69511.5	1	4508
	R.QEMHKDLEEVK.Q	U	1		693.3420	1384.6695	1384.6656	2.81	1	12	52133.6	1	4904
	K.VQPYLDEFQKK.W	U	2		465.5841	1393.7305	1393.7242	4.56	1	(20)	-86889.4	1	5005
	K.VQPYLDEFQKK.W	U	3		697.8734	1393.7323	1393.7242	5.82	1	46	199846	1	5008
	R.DYVAQFEASALGK.Q	U	3		699.8520	1397.6895	1397.6827	4.92	0	74	321491	1	5046
	K.VAPLGEEFREGAR.Q	U	2		715.8773	1429.7400	1429.7314	6.02	1	34	147712	1	5313
	K.VAPLGEEFREGAR.Q	U	3		477.5873	1429.7402	1429.7314	6.18	1	(22)	-95578.3	1	5314
	R.VKDFATVYVEAIK.D	U	1		741.9182	1481.8219	1481.8130	6.00	1	(18)	-78200.4	1	5844
	R.VKDFATVYVEAIK.D	U	1		494.9481	1481.8224	1481.8130	6.33	1	19	82544.9	1	5845
	K.LLDNWDTLASTLSK.V	U	1		788.9183	1575.8220	1575.8144	4.80	0	40	173779	1	6603
	R.QQLAPYSDDLRQR.L	U	1		795.4080	1588.8014	1588.7957	3.54	1	24	104267	1	6704
	R.QQLAPYSDDLRQR.L	U	2		530.6082	1588.8028	1588.7957	4.46	1	(17)	-73856	1	6706
	R->.<-QKVAPLGEEFREGAR.Q	U	1	Gln->pyro-Glu (N-term Q)	557.2966	1668.8679	1668.8584	5.71	2	(1)	-4344.47	1	7330
	R.QKVAPLGEEFREGAR.Q	U	2		562.9730	1685.8972	1685.8849	7.32	2	22	95578.3	1	7409
	R.LEALKEGGGSLAEYHAK.A	U	1		886.9678	1771.9211	1771.9104	6.03	1	(0)	0	1	7882
	R.LEALKEGGGSLAEYHAK.A	U	1		591.6478	1771.9215	1771.9104	6.25	1	23	99922.8	1	7883
K4JDR8	Alpha-2-macroglobulin variant 5 OS=Bos taurus GN=A2M PE=2 SV=1	45388	551	28(17)	11(9)	0.88	32%	K4JDR8_uniprot		0.000616903	2.68012	-0.125	7.08
	Peptide	Unique	Matches	Modification	Observed	Mr(expt)	Mr(calc)	ppm	Miss	Score	#VALUE!	Rank	Query
	K.YNILPK.K		3		374.2261	746.4377	746.4326	6.81	0	19	82544.9	1	89
	R.DLKPAIVK.V		2		442.2868	882.5591	882.5538	5.98	0	32	139023	1	879
	R.YGAATFTSAR.K		2		522.7624	1043.5102	1043.5036	6.35	0	62	269357	1	1711
	R.VLTEDIYQPR.A		4		617.3300	1232.6454	1232.6401	4.28	0	69	299768	1	3392
	R.NALFCLDSAWK.S		3		662.8245	1323.6345	1323.6281	4.79	0	75	325835	1	4432
	R.TEVLTSLYEEAVK.E		2		741.3947	1480.7749	1480.7661	5.94	0	49	212879	1	5834
	K.ALLAYAFALAGNQER.R		1		804.4381	1606.8617	1606.8467	9.32	0	39	169434	1	6875
	R.RTEVLTSLYEEAVK.E		1		819.4454	1636.8763	1636.8672	5.58	1	(10)	-43444.7	1	7125
	R.RTEVLTSLYEEAVK.E		2		546.6344	1636.8814	1636.8672	8.68	1	20	86889.4	1	7128
	R.TEVSNNHVLIYLDK.V		1		822.9335	822.9335	1643.8525	0.39	0	(0)	0	2	7190
	R.TEVSNNHVLIYLDK.V		1		548.9616	1643.8630	1643.8519	6.77	0	40	173779	1	7191
	K.QQNCQGGFSSTQDTVVALHALSR.Y		3		835.4075	2503.2008	2503.1874	5.33	0	96	417069	1	10915
	K.VYDYYETDEFAVAEYSAPCSK.D		2		836.3622	2506.0647	2506.0522	4.99	0	(15)	-65167	1	10927
	K.VYDYYETDEFAVAEYSAPCSK.D		1		1254.0400	2506.0655	2506.0522	5.31	0	31	134679	1	10928
A6QPP2	SERPIND1 protein OS=Bos taurus GN=SERPIND1 PE=2 SV=1	55457	512	29(18)	11(9)	0.78	21%	A6QPP2_uniprot		0.000522928	2.27184	-0.134	6.37
	Peptide	Unique	Matches	Modification	Observed	Mr(expt)	Mr(calc)	ppm	Miss	Score	#VALUE!	Rank	Query
	K.VPMMQTK.G	U	1		417.7167	833.4189	833.4139	6.00	0	23	99922.8	1	516
	R.IVIDLFK.H	U	4		424.2702	846.5259	846.5215	5.23	0	55	238946	1	686
	R.NFGYTLR.S	U	1		435.7296	869.4445	869.4395	5.75	0	41	178123	1	786
	R.TREVLLPK.F	U	2		478.3031	954.5916	954.5862	5.65	1	14	60822.6	1	1185
	K.DYDLVGALR.A	U	3		511.2727	1020.5309	1020.5240	6.79	0	48	208535	1	1594
	R.SVSDLYVQK.Q	U	2		519.7789	1037.5433	1037.5393	3.84	0	29	125990	1	1703
	R.TSCLLFLGR.V	U	2		533.7927	1065.5709	1065.5641	6.37	0	36	156401	1	1908
	R.EYYFAEVR.A	U	2		538.7595	1075.5044	1075.4974	6.44	0	27	117301	1	1920
	K.TLESQLTPQAVER.W	U	3		736.3956	1470.7766	1470.7678	5.97	0	61	265013	1	5742
	K.TLESQLTPQAVER.W	U	2		491.2665	1470.7778	1470.7678	6.79	0	(25)	-108612	1	5745
	R.AADFSDPAFLAHTNR.H	U	3		816.8967	1631.7788	1631.7692	5.87	0	73	317146	1	7057
	R.AADFSDPAFLAHTNR.H	U	2		544.9338	1631.7795	1631.7692	6.31	0	(69)	-299768	1	7058
	K.GAFLAASDQELDCDVLR.L	U	2		940.4516	1878.8886	1878.8782	5.57	0	94	408380	1	8376
P50448	Factor XIIa inhibitor OS=Bos taurus PE=1 SV=1	51919	500	33(23)	11(9)	1.09	21%	P50448_uniprot		0.000635605	2.76137	-0.072	6.19
	Peptide	Unique	Matches	Modification	Observed	Mr(expt)	Mr(calc)	ppm	Miss	Score	#VALUE!	Rank	Query
	K.IAFDKGR.T	U	1		403.7313	805.4480	805.4446	4.22	1	31	134679	1	400
	K.FPVF->M<-GR.V	U	1	Oxidation (M)	435.2234	868.4322	868.4266	6.46	0	2	8688.94	1	776
	K.DTFAEASQR.L	U	2		512.7415	1023.4684	1023.4621	6.10	0	42	182468	1	1619
	K.YPVASFTDR.T	U	4		528.2656	1054.5167	1054.5084	7.91	0	53	230257	1	1824
	R.TSTKPFHLK.S	U	2		529.8066	1057.5986	1057.5920	6.22	0	26	112956	1	1848
	R.LYQDFSVLK.K	U	4		556.8054	1111.5962	1111.5914	4.33	0	49	212879	1	2210
	R.LLDSLPEDTR.L	U	2		579.8070	1157.5995	1157.5928	5.76	0	58	251979	1	2622
	K.KYPVASFTDR.T	U	3		592.3112	1182.6079	1182.6033	3.87	1	51	221568	1	2955
	K.KYPVASFTDR.T	U	5		395.2104	1182.6093	1182.6033	5.09	1	(42)	-182468	1	2958
	R.RLLDSLPEDTR.L	U	2		438.9078	1313.7017	1313.6939	5.92	1	(34)	-147712	1	4307
	R.RLLDSLPEDTR.L	U	2		657.8583	1313.7021	1313.6939	6.26	1	45	195501	1	4308
	R.SAEAVLGEALTDFSLR.L	U	2		839.9408	1677.8670	1677.8573	5.78	0	71	308457	1	7391
	R.SAEAVLGEALTDFSLR.L	U	1		560.2963	1677.8672	1677.8573	5.85	0	(54)	-234601	1	7392
	R.HQATLELTESGVDATAASVVSVAR.N	U	2		804.7549	2411.2428	2411.2292	5.63	0	62	269357	1	10688
										SUM
										0.0230178
*	Normalized spectral count (NSpC) values were calculated for each protein hit according to eq 1 (SI).
**	GRAVY represents Grand average of hydropathicity. Data were collected from ExPASy database.
***	PI represents isoelectric point. Data were collected from ExPASy database.

## Sheet: N2H4-RGO
Accession	Description	Mass	Score	Matches	Sequences	emPAI	Coverage			SpCi*	NpSpC*	GRAVY**	PI***
Q2UVX4	Complement C3 OS=Bos taurus GN=C3 PE=1 SV=2	188675	4537	288(189)	81(65)	3.84	42%	Q2UVX4_uniprot		0.00152643	7.87305	-0.349	6.41
G3X7A5	Complement C3 OS=Bos taurus GN=C3 PE=4 SV=1	188568	4537	288(189)	81(65)		42%	G3X7A5_uniprot			0
	Peptide	Unique	Matches	Modification	Observed	Mr(expt)	Mr(calc)	ppm	Miss	Score	#VALUE!	Rank	Query
	K.FGLEKR.Q	U	1		375.2204	748.4262	748.4232	4.13	1	41	211470	1	107
	K.GVFVLNK.K	U	2		388.7399	775.4652	775.4592	7.76	0	24	123787	1	219
	K.ISYIIGK.D	U	3		397.2464	792.4782	792.4745	4.63	0	41	211470	1	351
	R.VGLVAVDK.G	U	3		400.7502	799.4859	799.4804	6.89	0	56	288837	1	397
	K.WLILEK.Q	U	4		401.2493	800.4841	800.4796	5.63	0	39	201154	1	404
	R.FYHPDK.E	U	1		403.6970	805.3795	805.3759	4.55	0	2	10315.6	1	434
	R.LPYSVVR.N	U	2		417.2504	832.4863	832.4807	6.76	0	32	165050	1	570
	R.SVQLMEK.R	U	2		417.7253	833.4360	833.4317	5.20	0	29	149576	1	574
	R.DGALELAR.S	U	2		422.7321	843.4496	843.4450	5.41	0	45	232101	1	622
	R.WLNEQR.Y	U	4		423.2194	844.4243	844.4191	6.18	0	34	175365	1	703
	K.DLCETVK.W	U	1		432.7130	863.4115	863.4059	6.48	0	19	97998.3	1	796
	K.GVFVLNKK.N	U	3		452.7871	903.5596	903.5542	6.00	1	33	170208	1	971
	R.AILYNYR.E	U	3		456.7532	911.4918	911.4865	5.84	0	41	211470	1	1022
	R.DPLTITVR.T	U	4		457.7717	913.5288	913.5233	6.02	0	34	175365	1	1039
	K.LSINTQNK.R	U	1		459.2589	916.5033	916.4978	6.00	0	47	242417	1	1048
	K.LEGDRLTK.F	U	1		466.2666	930.5186	930.5134	5.61	1	38	195997	1	1072
	K.FLNTAKEK.N	U	1		475.7717	949.5288	949.5233	5.83	1	23	118630	1	1201
	R.EAENLKVR.V	U	1		479.7721	957.5296	957.5243	5.56	1	36	185681	1	1247
	R->.<-QESLELIR.K	U	3	Gln->pyro-Glu (N-term Q)	485.7670	969.5194	969.5131	6.56	0	54	278521	1	1341
	R.QESLELIR.K	U	4		494.2800	986.5454	986.5396	5.90	0	(53)	-273364	1	1445
	K.AGQYSSDLR.K	U	2		498.7437	995.4728	995.4672	5.62	0	59	304311	1	1514
	R.KIWDVVEK.A	U	3		508.7962	1015.5778	1015.5702	7.45	1	50	257890	1	1650
	K.IGLHEVEVK.A	U	2		512.2989	1022.5833	1022.5760	7.15	0	43	221786	1	1715
	R.ISLTHSLTR.V	U	2		514.3017	1026.5888	1026.5822	6.49	0	51	263048	1	1749
	K.LSINTQNKR.D	U	1		358.5414	1072.6025	1072.5989	3.37	1	(30)	-154734	1	2019
	K.LSINTQNKR.D	U	1		537.3088	1072.6031	1072.5989	3.96	1	41	211470	1	2020
	K.GYTQQLAFR.Q	U	3		542.2855	1082.5564	1082.5509	5.06	0	64	330100	1	2065
	K.LCHKDTCR.C	U	1		363.8374	1088.4905	1088.4855	4.53	1	(25)	-128945	1	2124
	K.LCHKDTCR.C	U	1		545.2527	1088.4909	1088.4855	4.97	1	37	190839	1	2125
	K.ADIGCTPGSGR.N	U	1		545.7541	1089.4937	1089.4873	5.90	0	36	185681	1	2133
	K.NTLIIYLDK.V	U	2		546.8219	1091.6292	1091.6226	6.06	0	35	180523	1	2158
	R->.<-QESLELIRK.G	U	2	Gln->pyro-Glu (N-term Q)	549.8147	1097.6148	1097.6080	6.20	1	(19)	-97998.3	1	2217
	K.DSCMGTLVVK.N	U	1		555.2744	1108.5341	1108.5257	7.64	0	20	103156	1	2303
	R.QESLELIRK.G	U	2		558.3274	1114.6402	1114.6346	5.06	1	46	237259	1	2385
	K.AGQYSSDLRK.C	U	1		375.5300	1123.5683	1123.5622	5.43	1	(28)	-144419	1	2493
	K.AGQYSSDLRK.C	U	1		562.7914	1123.5683	1123.5622	5.49	1	33	170208	1	2494
	K.GSMILDICTK.Y	U	6		569.2900	1136.5654	1136.5570	7.43	0	(45)	-232101	1	2651
	K.RQESLELIR.K	U	4		381.8895	1142.6467	1142.6407	5.20	1	48	247575	1	2734
	K.RQESLELIR.K	U	3		572.3309	1142.6473	1142.6407	5.76	1	(40)	-206312	1	2737
	K.TSQGLETQQR.A	U	1		574.2929	1146.5711	1146.5629	7.18	0	49	252732	1	2750
	K.GS->M<-ILDICTK.Y	U	1	Oxidation (M)	577.2865	1152.5584	1152.5519	5.70	0	51	263048	1	2774
	R.TKKDNIPEGR.Q	U	2		579.3197	1156.6248	1156.6200	4.18	2	52	268206	1	2802
	R.TKKDNIPEGR.Q	U	3		386.5492	1156.6258	1156.6200	5.03	2	(34)	-175365	1	2804
	K.DYDTTPPVVR.W	U	3		581.7929	1161.5713	1161.5666	4.00	0	42	216628	1	2860
	R.HQQTITIPAR.S	U	3		582.8318	1163.6490	1163.6411	6.81	0	57	293995	1	2896
	R->.<-QVLLNGVQPSR.A	U	3	Gln->pyro-Glu (N-term Q)	597.3387	1192.6628	1192.6564	5.35	0	(44)	-226943	1	3250
	R.VSIRPAPETVK.K	U	2		598.8541	1195.6936	1195.6925	0.93	0	50	257890	1	3289
	R.VSIRPAPETVK.K	U	2		399.5729	1195.6970	1195.6925	3.79	0	(20)	-103156	1	3291
	K.NRWEEPNQK.L	U	1		400.8647	1199.5722	1199.5683	3.29	1	(25)	-128945	1	3316
	K.NRWEEPNQK.L	U	2		600.7934	1199.5722	1199.5683	3.29	1	44	226943	1	3317
	R.YISKYEMNR.D	U	1		602.2961	1202.5776	1202.5753	1.88	1	(21)	-108314	1	3373
	R.YISKYEMNR.D	U	1		401.8666	1202.5780	1202.5753	2.21	1	32	165050	1	3374
	R.QVLLNGVQPSR.A	U	3		605.8531	1209.6916	1209.6830	7.16	0	54	278521	1	3465
	R.KGYTQQLAFR.Q	U	1		404.5587	1210.6543	1210.6458	7.01	1	21	108314	1	3474
	K.EVTLEDRLDK.A	U	2		406.5532	1216.6377	1216.6299	6.36	1	10	51578.1	1	3511
	R.YISKYE->M<-NR.D	U	1	Oxidation (M)	407.1987	1218.5743	1218.5703	3.29	1	(15)	-77367.1	1	3513
	K.AGDFLENHYR.E	U	2		611.2897	1220.5649	1220.5574	6.14	0	76	391993	1	3515
	K.AGDFLENHYR.E	U	3		407.8623	1220.5652	1220.5574	6.37	0	(39)	-201154	1	3517
	R.YYTYMI->M<-NK.G	U	1	Oxidation (M)	621.7833	1241.5521	1241.5460	4.89	0	4	20631.2	1	3697
	K.RQESLELIRK.G	U	4		424.5885	1270.7438	1270.7357	6.35	2	44	226943	1	4039
	R.KDYDTTPPVVR.W	U	3		645.8410	1289.6674	1289.6616	4.55	1	60	309468	1	4224
	R.KDYDTTPPVVR.W	U	2		430.8965	1289.6678	1289.6616	4.84	1	(38)	-195997	1	4225
	K.ACEPGVDYVYK.T	U	2		650.8015	1299.5883	1299.5805	6.01	0	40	206312	1	4316
	R.VPINDGNGEAILK.R	U	4		670.3677	1338.7208	1338.7143	4.85	0	89	459045	1	4723
	K.FYYIDDPDGLK.V	U	5		673.3234	1344.6322	1344.6238	6.24	0	56	288837	1	4759
	R.EVVADSVWVDVK.D	U	31		673.3575	1344.7004	1344.6926	5.84	0	74	381678	1	4794
	K.DICEAQVNSLGR.S	U	2		681.3320	1360.6494	1360.6405	6.53	0	72	371362	1	4973
	K.SGSDEVQVKQER.K	U	1		454.5626	1360.6659	1360.6583	5.64	1	(50)	-257890	1	4976
	K.SGSDEVQVKQER.K	U	1		681.3409	1360.6672	1360.6583	6.57	1	86	443571	1	4977
	K.AAVYNHFISDGVK.K	U	2		474.2475	1419.7207	1419.7147	4.23	0	44	226943	1	5481
	K.VSHTVEDCLSFK.V	U	1		711.3425	1420.6704	1420.6657	3.31	0	(25)	-128945	1	5487
	K.VSHTVEDCLSFK.V	U	2		474.5654	1420.6745	1420.6657	6.18	0	32	165050	1	5490
	K.EKNRWEEPNQK.L	U	1		729.3633	1456.7120	1456.7058	4.23	2	13	67051.5	1	5823
	K.EKNRWEEPNQK.L	U	1		486.5781	1456.7124	1456.7058	4.53	2	(8)	-41262.4	1	5824
	R.NYAGVFTDAGLTLK.T	U	8		735.3892	1468.7639	1468.7562	5.24	0	67	345573	1	5946
	R.QQHSRDGALELAR.S	U	2		494.2619	1479.7638	1479.7542	6.47	1	10	51578.1	1	6069
	R.VPINDGNGEAILKR.Q	U	4		748.4199	1494.8252	1494.8154	6.53	1	91	469360	1	6202
	R.VPINDGNGEAILKR.Q	U	4		499.2828	1494.8265	1494.8154	7.42	1	(89)	-459045	1	6204
	R.MDKAGQYSSDLRK.C	U	1		500.2494	1497.7264	1497.7245	1.26	2	6	30946.8	1	6247
	R.TLNPEHLGQGGVQR.E	U	1		502.6011	1504.7815	1504.7746	4.54	0	(30)	-154734	1	6319
	R.TLNPEHLGQGGVQR.E	U	2		753.3990	1504.7834	1504.7746	5.84	0	49	252732	1	6320
	R.DSNKNTLIIYLDK.V	U	2		512.9498	1535.8275	1535.8195	5.20	1	(25)	-128945	1	6470
	R.DSNKNTLIIYLDK.V	U	2		768.9215	1535.8285	1535.8195	5.85	1	58	299153	1	6471
	R.FYHPDKEDGMLSK.L	U	2		783.8708	1565.7270	1565.7184	5.50	1	(30)	-154734	1	6749
	R.FYHPDKEDGMLSK.L	U	3		522.9164	1565.7275	1565.7184	5.80	1	53	273364	1	6752		1
	R.SEETKENERFTVK.A	U	1		532.9367	1595.7883	1595.7791	5.78	2	3	15473.4	1	7064		1
	R.LDKACEPGVDYVYK.T	U	1		828.9063	1655.7979	1655.7865	6.91	1	15	77367.1	1	7569		1
	K.AFLDCCEYITQLR.Q	U	1		844.8962	1687.7779	1687.7698	4.81	0	13	67051.5	1	7743		1
	R.CAEENCFMHHTEK.E	U	1		564.8934	1691.6583	1691.6490	5.47	0	12	61893.7	1	7761		1
	K.VYSYYNLDETCIR.F	U	3		848.3928	1694.7711	1694.7610	5.95	0	89	459045	1	7775		1
	K.VYSYYNLDETCIR.F	U	1		565.9315	1694.7727	1694.7610	6.92	0	(11)	-56735.9	1	7779		1
	K.DSITTWEILAVSLSDK.K	U	1		889.4729	1776.9312	1776.9145	9.41	0	50	257890	1	8245		1
	R.SDLDDDIIPEEDIISR.S	U	2		615.6327	1843.8762	1843.8687	4.09	0	(53)	-273364	1	8533		1
	R.SDLDDDIIPEEDIISR.S	U	12		922.9465	1843.8785	1843.8687	5.32	0	84	433256	1	8540		1
	K.DSITTWEILAVSLSDKK.G	U	1		636.0146	1905.0221	1905.0095	6.63	1	(66)	-340415	1	8880		1
	K.DSITTWEILAVSLSDKK.G	U	1		953.5193	1905.0240	1905.0095	7.63	1	86	443571	1	8881		1
	K.EYVLPSFEVQLEPEEK.F	U	4		968.4874	1934.9602	1934.9513	4.60	0	68	350731	1	9073		1
	K.EYVLPSFEVQLEPEEK.F	U	2		645.9944	1934.9613	1934.9513	5.18	0	(30)	-154734	1	9076		1
	K.AYYEDSPQQVFSAEFEVK.E	U	3		713.0001	2135.9785	2135.9688	4.58	0	(22)	-113472	1	10079		1
	K.AYYEDSPQQVFSAEFEVK.E	U	5		1068.9978	2135.9810	2135.9688	5.76	0	83	428098	1	10090		1
	K.ILLQGTPVAQMTEDAIDGER.L	U	3		1079.0505	2156.0865	2156.0783	3.81	0	106	546727	1	10164		1
	K.ILLQGTPVAQMTEDAIDGER.L	U	3		719.7030	2156.0872	2156.0783	4.10	0	(94)	-484834	1	10166		1
	R.EEVPAADLSDQVPDTESETK.I	U	4		1080.4996	2158.9847	2158.9754	4.33	0	100	515781	1	10186		1
	R.EEVPAADLSDQVPDTESETK.I	U	3		720.6693	2158.9861	2158.9754	4.98	0	(46)	-237259	1	10190		1
	K.ILLQGTPVAQ->M<-TEDAIDGER.L	U	3	Oxidation (M)	725.0352	2172.0838	2172.0732	4.88	0	(67)	-345573	1	10251		1
	K.ILLQGTPVAQ->M<-TEDAIDGER.L	U	3	Oxidation (M)	1087.0494	2172.0843	2172.0732	5.10	0	(66)	-340415	1	10254		1
	R.HIPVVTQGSNVQSLTQDDGVAK.L	U	3		765.0698	2292.1876	2292.1710	7.25	0	57	293995	1	10789		1
	R.HIPVVTQGSNVQSLTQDDGVAK.L	U	1		1147.1012	2292.1878	2292.1710	7.34	0	(5)	-25789	1	10790		1
	R.CAEENCFMHHTEKEVTLEDR.L	U	1		845.6986	2534.0740	2534.0624	4.57	1	(9)	-46420.2	1	11527		1
	R.CAEENCFMHHTEKEVTLEDR.L	U	2		634.5259	2534.0747	2534.0624	4.83	1	42	216628	1	11528		1
	K.QVLSNENTQLNSNNGYLSTVTIK.I	U	1		846.4365	2536.2877	2536.2769	4.28	0	2	10315.6	1	11541		1
	R.FLYGEQVDGTAFVIFGVQDGDRR.I	U	1		863.7698	2588.2877	2588.2660	8.38	1	22	113472	1	11723		1
	R.DGALELARSDLDDDIIPEEDIISR.S	U	1		890.7792	2669.3159	2669.3031	4.78	1	64	330100	1	11979		1
	R.TLNPEHLGQGGVQREEVPAADLSDQVPDTESETK.I	U	2		1216.2605	3645.7597	3645.7394	5.55	1	34	175365	1	13271		1
	R.TLNPEHLGQGGVQREEVPAADLSDQVPDTESETK.I	U	2		912.4473	3645.7602	3645.7394	5.70	1	(26)	-134103	1	13272		-0.429
P02769	Serum albumin OS=Bos taurus GN=ALB PE=1 SV=4	71244	4132	242(149)	52(42)	16.07	71%	P02769_uniprot		0.00339678	17.5199	-0.429	5.82
	Peptide	Unique	Matches	Modification	Observed	Mr(expt)	Mr(calc)	ppm	Miss	Score	#VALUE!	Rank	Query
	K.GACLLPK.I		5		379.7175	757.4204	757.4156	6.36	0	35	180523	1	152
	K.LVTDLTK.V		5		395.2423	788.4701	788.4644	7.23	0	41	211470	1	263
	R.LSQKFPK.A		4		424.2567	846.4989	846.4963	3.08	1	38	195997	1	733
	R.LCVLHEK.T		2		449.7456	897.4766	897.4742	2.65	0	34	175365	1	931
	K.AEFVEVTK.L		3		461.7502	921.4858	921.4807	5.50	0	41	211470	1	1053
	K.YLYEIAR.R		4		464.2527	926.4908	926.4861	5.01	0	24	123787	1	1059
	K.DLGEEHFK.G		2		487.7353	973.4560	973.4505	5.62	0	29	149576	1	1356
	K->.<-QTALVELLK.H		1	Gln->pyro-Glu (N-term Q)	499.3031	996.5917	996.5855	6.19	0	(41)	-211470	1	1527
	K.LVVSTQTALA.-		9		501.7971	1001.5797	1001.5757	4.03	0	20	103156	1	1557
	K.QTALVELLK.H		5		507.8162	1013.6178	1013.6121	5.62	0	57	293995	1	1627
	K.SHCIAEVEK.D		1		358.1759	1071.5060	1071.5019	3.81	0	(31)	-159892	1	2014
	K.SHCIAEVEK.D		1		536.7609	1071.5072	1071.5019	4.94	0	38	195997	1	2015
	K.YLYEIARR.H		1		542.3041	1082.5936	1082.5872	5.89	1	(9)	-46420.2	1	2070
	K.YLYEIARR.H		1		361.8721	1082.5944	1082.5872	6.60	1	10	51578.1	1	2071
	K.EACFAVEGPK.L		4		554.2642	1106.5139	1106.5066	6.55	0	51	263048	1	2277
	K.CCTESLVNR.R		3		569.7568	1137.4990	1137.4907	7.31	0	64	330100	1	2659
	K.KQTALVELLK.H		4		381.5784	1141.7135	1141.7070	5.63	1	(40)	-206312	1	2723
	K.KQTALVELLK.H		4		571.8644	1141.7142	1141.7070	6.29	1	71	366204	1	2726
	K.LVNELTEFAK.T		6		582.3226	1162.6306	1162.6234	6.21	0	71	366204	1	2879
	R.DTHKSEIAHR.F	U	3		597.3066	1192.5986	1192.5949	3.14	1	(36)	-185681	1	3229
	R.DTHKSEIAHR.F	U	9		398.5414	1192.6022	1192.5949	6.17	1	50	257890	1	3243
	R.FKDLGEEHFK.G		5		625.3168	1248.6190	1248.6139	4.09	1	52	268206	1	3778
	R.FKDLGEEHFK.G		5		417.2149	1248.6228	1248.6139	7.13	1	(40)	-206312	1	3791
	K.ECCDKPLLEK.S		1		646.3074	1290.6003	1290.5948	4.28	0	44	226943	1	4233
	K.ECCDKPLLEK.S		1		431.2077	1290.6014	1290.5948	5.09	0	(4)	-20631.2	1	4234
	K.FPKAEFVEVTK.L		1		647.8592	1293.7038	1293.6969	5.37	1	24	123787	1	4282
	K.FPKAEFVEVTK.L		1		432.2420	1293.7042	1293.6969	5.63	1	(9)	-46420.2	1	4283
	K.HLVDEPQNLIK.Q		2		435.9121	1304.7146	1304.7088	4.41	0	(45)	-232101	1	4407
	K.HLVDEPQNLIK.Q		9		653.3663	1304.7180	1304.7088	7.02	0	71	366204	1	4414
	K.TVMENFVAFVDK.C	U	1		700.3528	1398.6910	1398.6853	4.05	0	(57)	-293995	1	5287
	K.TV->M<-ENFVAFVDK.C	U	4	Oxidation (M)	708.3519	1414.6893	1414.6803	6.39	0	87	448729	1	5419
	K.SLHTLFGDELCK.V		6		473.9051	1418.6935	1418.6864	5.03	0	(38)	-195997	1	5454
	K.SLHTLFGDELCK.V		4		710.3541	1418.6936	1418.6864	5.05	0	55	283679	1	5455
	K.YICDNQDTISSK.L		8		722.3267	1442.6388	1442.6347	2.79	0	101	520938	1	5687
	K.TCVADESHAGCEK.S		1		732.3019	1462.5892	1462.5817	5.15	0	44	226943	1	5880
	R.ETYGDMADCCEK.Q	U	2		739.7696	1477.5247	1477.5160	5.95	0	50	257890	1	6049
	K.LGEYGFQNALIVR.Y	U	3		740.4049	1478.7953	1478.7881	4.82	0	98	505465	1	6065
	K.EYEATLEECCAK.D		3		751.8150	1501.6154	1501.6065	5.98	0	46	237259	1	6278
	K.VPQVSTPTLVEVSR.S		2		756.4291	1510.8437	1510.8355	5.43	0	73	376520	1	6346
	K.LKECCDKPLLEK.S		2		766.8976	1531.7807	1531.7738	4.52	1	66	340415	1	6443
	K.LKECCDKPLLEK.S		3		511.6010	1531.7812	1531.7738	4.83	1	(54)	-278521	1	6444
	K.LKECCDKPLLEK.S		2		383.9531	1531.7831	1531.7738	6.09	1	(10)	-51578.1	1	6445
	R.LCVLHEKTPVSEK.V		1		385.7128	1538.8221	1538.8127	6.14	1	(41)	-211470	1	6516
	R.LCVLHEKTPVSEK.V		2		770.4186	1538.8226	1538.8127	6.47	1	55	283679	1	6519
	R.LCVLHEKTPVSEK.V		2		513.9484	1538.8235	1538.8127	7.02	1	(44)	-226943	1	6520
	K.LKHLVDEPQNLIK.Q		1		773.9542	1545.8939	1545.8878	3.91	1	(19)	-97998.3	1	6591
	K.LKHLVDEPQNLIK.Q		2		516.3058	1545.8955	1545.8878	4.98	1	38	195997	1	6593
	K.DDPHACYSTVFDK.L	U	3		777.8342	1553.6539	1553.6457	5.30	0	44	226943	1	6662
	K.DAFLGSFLYEYSR.R		3		784.3798	1566.7450	1566.7354	6.08	0	67	345573	1	6773
	K.DAFLGSFLYEYSR.R		1		523.2556	1566.7450	1566.7354	6.12	0	(33)	-170208	1	6774
	K.LKPDPNTLCDEFK.A		4		788.8924	1575.7702	1575.7603	6.32	0	60	309468	1	6858
	K.LKPDPNTLCDEFK.A		4		526.2643	1575.7710	1575.7603	6.81	0	(45)	-232101	1	6859
	R.KVPQVSTPTLVEVSR.S		2		820.4769	1638.9393	1638.9305	5.39	1	(61)	-314626	1	7460
	R.KVPQVSTPTLVEVSR.S		3		547.3208	1638.9406	1638.9305	6.16	1	69	355889	1	7462
	R.MPCTEDYLSLILNR.L	U	1		862.9255	1723.8364	1723.8273	5.28	0	19	97998.3	1	7976
	K.YNGVFQECCQAEDK.G		6		874.3619	1746.7093	1746.6978	6.62	0	83	428098	1	8085
	K.ECCHGDLLECADDR.A		2		583.8958	1748.6654	1748.6553	5.81	0	33	170208	1	8100
	K.ECCHGDLLECADDR.A		1		875.3407	1748.6668	1748.6553	6.63	0	(4)	-20631.2	1	8102
	K.DDPHACYSTVFDKLK.H	U	1		599.2857	1794.8353	1794.8247	5.91	1	12	61893.7	1	8327
	R.LAKEYEATLEECCAK.D		1		907.9242	1813.8338	1813.8226	6.20	1	90	464202	1	8420
	R.LAKEYEATLEECCAK.D		1		605.6188	1813.8347	1813.8226	6.67	1	(13)	-67051.5	1	8421
	R.RPCFSALTPDETYVPK.A		2		940.9701	1879.9257	1879.9138	6.34	0	(23)	-118630	1	8747
	R.RPCFSALTPDETYVPK.A		3		627.6494	1879.9264	1879.9138	6.69	0	27	139261	1	8750
	R.NECFLSHKDDSPDLPK.L		1		476.2256	1900.8734	1900.8625	5.71	1	(10)	-51578.1	1	8855
	R.NECFLSHKDDSPDLPK.L		1		634.6320	1900.8741	1900.8625	6.07	1	52	268206	1	8857
	R.NECFLSHKDDSPDLPK.L		2		951.4446	1900.8746	1900.8625	6.36	1	(6)	-30946.8	1	8858
	K.LFTFHADICTLPDTEK.Q		1		636.6472	1906.9198	1906.9135	3.31	0	3	15473.4	1	8891
	K.CCAADDKEACFAVEGPK.L		2		964.4067	1926.7988	1926.7910	4.04	1	100	515781	1	9039
	K.CCAADDKEACFAVEGPK.L		3		643.2745	1926.8018	1926.7910	5.59	1	(53)	-273364	1	9043
	K.DAIPENLPPLTADFAEDK.D		3		978.4890	1954.9633	1954.9524	5.62	0	58	299153	1	9206
	K.DAIPENLPPLTADFAEDK.D		2		652.6617	1954.9634	1954.9524	5.64	0	(48)	-247575	1	9207
	K.LKPDPNTLCDEFKADEK.K		6		673.9975	2018.9707	2018.9619	4.35	1	84	433256	1	9537
	K.LKPDPNTLCDEFKADEK.K		6		1010.4928	2018.9710	2018.9619	4.54	1	(65)	-335257	1	9539
	K.LKPDPNTLCDEFKADEK.K		5		505.7504	2018.9726	2018.9619	5.32	1	(31)	-159892	1	9546
	K.VHKECCHGDLLECADDR.A		2		529.2304	2112.8925	2112.8775	7.09	1	34	175365	1	9976
	K.LKPDPNTLCDEFKADEKK.F		4		716.6969	2147.0689	2147.0568	5.60	2	22	113472	1	10133
	K.ECCHGDLLECADDRADLAK.Y		2		749.9889	2246.9448	2246.9354	4.18	1	22	113472	1	10527
	K.ECCHGDLLECADDRADLAK.Y		1		562.7438	2246.9460	2246.9354	4.69	1	(11)	-56735.9	1	10528
	K.DAIPENLPPLTADFAEDKDVCK.N		1		1229.5969	2457.1793	2457.1733	2.42	1	(1)	-5157.81	1	11249
	K.DAIPENLPPLTADFAEDKDVCK.N		4		820.0689	2457.1847	2457.1733	4.63	1	76	391993	1	11252
	K->.<-QEPERNECFLSHKDDSPDLPK.L		1	Gln->pyro-Glu (N-term Q)	842.0563	2523.1470	2523.1336	5.30	2	(1)	-5157.81	1	11475
	K.QEPERNECFLSHKDDSPDLPK.L		1		509.0415	2540.1711	2540.1601	4.32	2	(7)	-36104.6	1	11563
	K.QEPERNECFLSHKDDSPDLPK.L		2		847.7332	2540.1778	2540.1601	6.96	2	19	97998.3	1	11568
	K.QEPERNECFLSHKDDSPDLPK.L		2		636.0521	2540.1791	2540.1601	7.48	2	(13)	-67051.5	1	11570
	K.EYEATLEECCAKDDPHACYSTVFDK.L	U	1		1013.4246	3037.2520	3037.2416	3.44	1	2	10315.6	1	12656
G3X6N3	Serotransferrin OS=Bos taurus GN=TF PE=3 SV=1	79783	2633	136(95)	48(40)	8.16	59%	G3X6N3_uniprot		0.00170462	8.79212	-0.451	7.13
	Peptide	Unique	Matches	Modification	Observed	Mr(expt)	Mr(calc)	ppm	Miss	Score	#VALUE!	Rank	Query			7064
	K.GDVAFVK.D		3		368.2080	734.4015	734.3963	7.12	0	28	144419	1	81			7569
	K.CLASIAK.K		2		381.7150	761.4154	761.4105	6.45	0	41	211470	1	169			7743
	K.DSADGFLK.I		2		426.7114	851.4082	851.4025	6.66	0	37	190839	1	781			7761
	R.GPNHAVVSR.K		1		468.7563	935.4980	935.4937	4.61	0	14	72209.3	1	1114			7775
	K.LCQLCAGK.G		2		475.2363	948.4580	948.4521	6.20	0	48	247575	1	1196			7779
	K.TSHMDCIK.A		1		496.2235	990.4323	990.4263	6.12	0	15	77367.1	1	1471			8245
	K.ENFEVLCK.D		2		519.7529	1037.4913	1037.4852	5.92	0	34	175365	1	1794			8533
	R.SAGWNIPMGK.L	U	4		530.7691	1059.5236	1059.5171	6.15	0	58	299153	1	1946			8540
	R.SAGWNIP->M<-GK.L	U	1	Oxidation (M)	538.7665	1075.5184	1075.5121	5.91	0	(1)	-5157.81	1	2026			8880
	R.YYGYTGAFR.C		3		549.2582	1096.5019	1096.4978	3.78	0	36	185681	1	2208			8881
	K.KTSHMDCIK.A		1		560.2715	1118.5284	1118.5212	6.41	1	37	190839	1	2430			9073
	K.DLLFRDDTK.C		3		561.7956	1121.5766	1121.5717	4.41	1	43	221786	1	2463			9076
	K.DLLFRDDTK.C		2		374.8664	1121.5773	1121.5717	4.96	1	(8)	-41262.4	1	2464			10079
	K.WCAIGHQER.T		1		386.1845	1155.5318	1155.5244	6.44	0	36	185681	1	2791			10090
	K.KENFEVLCK.D		1		583.8005	1165.5864	1165.5801	5.39	1	21	108314	1	2911			10164
	K.DTDFKLNELR.G		3		625.8259	1249.6373	1249.6302	5.65	1	57	293995	1	3800			10166
	K.DTDFKLNELR.G		2		417.5532	1249.6379	1249.6302	6.14	1	(28)	-144419	1	3802			10186
	K.DSADGFLKIPSK.M		2		639.3436	1276.6727	1276.6663	5.01	1	29	149576	1	4103			10190
	K.DSADGFLKIPSK.M		1		426.5652	1276.6738	1276.6663	5.90	1	(21)	-108314	1	4105			10251
	K.ILNKQQDDFGK.S		1		653.3468	1304.6790	1304.6725	5.05	1	54	278521	1	4398			10254
	K.ILNKQQDDFGK.S		2		435.9006	1304.6799	1304.6725	5.69	1	(51)	-263048	1	4399			10789
	K.ELPDPQESIQR.A		5		656.3351	1310.6556	1310.6466	6.86	0	60	309468	1	4503			10790
	R.ILESGPFVSCVK.K		3		668.3565	1334.6983	1334.6904	5.93	0	79	407467	1	4706			11527
	R.WCTISTHEANK.C		2		449.5459	1345.6158	1345.6085	5.43	0	(34)	-175365	1	4824			11528
	R.WCTISTHEANK.C		2		673.8153	1345.6161	1345.6085	5.64	0	53	273364	1	4825			11541
	K.NYELLCGDNTR.K		2		677.8116	1353.6087	1353.5983	7.72	0	33	170208	1	4908			11723
	K.CGLVPVLAENYK.T		3		681.8619	1361.7092	1361.7013	5.80	0	67	345573	1	4991			11979
	R.CLVEKGDVAFVK.D		2		455.5825	1363.7257	1363.7170	6.42	1	29	149576	1	5008			13271
	K.KDTDFKLNELR.G		2		689.8730	1377.7314	1377.7252	4.52	2	70	361046	1	5043			13272
	K.TSDANINWNNLK.G		3		695.3445	1388.6745	1388.6684	4.40	0	72	371362	1	5163			5.82
	K.CLMEGAGDVAFVK.H		3		698.8372	1395.6599	1395.6527	5.18	0	(67)	-345573	1	5263
	K.CL->M<-EGAGDVAFVK.H		2	Oxidation (M)	706.8329	1411.6513	1411.6476	2.67	0	102	526096	1	5398
	K.GTGKECVPNSNER.Y		1		724.3371	1446.6596	1446.6521	5.20	1	(20)	-103156	1	5714
	K.GTGKECVPNSNER.Y		1		483.2272	1446.6598	1446.6521	5.28	1	22	113472	1	5715
	K.TYDSYLGDDYVR.A		6		733.8281	1465.6417	1465.6361	3.80	0	87	448729	1	5903
	K.ENFEVLCKDGTR.K		1		734.3556	1466.6966	1466.6824	9.72	1	2	10315.6	1	5915
	K.DLLFKDSADGFLK.I		1		490.2637	1467.7693	1467.7609	5.68	1	35	180523	1	5938
	R.KNYELLCGDNTR.K		2		494.9081	1481.7023	1481.6933	6.12	1	(50)	-257890	1	6077
	R.KNYELLCGDNTR.K		1		741.8586	1481.7027	1481.6933	6.39	1	60	309468	1	6079
	K.NYELLCGDNTRK.S		1		494.9082	1481.7029	1481.6933	6.49	1	(19)	-97998.3	1	6080
	K.NYELLCGDNTRK.S		1		741.8588	1481.7030	1481.6933	6.56	1	45	232101	1	6081
	K.NTPEKGYLAVAVVK.T		1		496.9551	1487.8433	1487.8348	5.75	1	18	92840.5	1	6122
	K.NTPEKGYLAVAVVK.T		1		744.9294	1487.8443	1487.8348	6.43	1	(10)	-51578.1	1	6123
	R.KPVTDAENCHLAR.G		1		378.4429	1509.7425	1509.7358	4.44	0	(64)	-330100	1	6342
	R.KPVTDAENCHLAR.G		1		755.8799	1509.7452	1509.7358	6.24	0	68	350731	1	6344
	R.KPVTDAENCHLAR.G		1		504.2557	1509.7453	1509.7358	6.30	0	(66)	-340415	1	6345
	K.KTYDSYLGDDYVR.A		3		797.8777	1593.7408	1593.7311	6.11	1	85	438413	1	7044
	K.KTYDSYLGDDYVR.A		2		532.2548	1593.7425	1593.7311	7.13	1	(51)	-263048	1	7045
	K.DNPQTHYYAVAVVK.K		1		802.9111	1603.8076	1603.7995	5.07	0	43	221786	1	7128
	K.HSTVFDNLPNPEDR.K		4		820.8910	1639.7675	1639.7590	5.18	0	103	531254	1	7469
	K.HSTVFDNLPNPEDR.K		4		547.5967	1639.7684	1639.7590	5.70	0	(57)	-293995	1	7472
	K.FDEFFSAGCAPGSPR.N		2		822.8640	1643.7135	1643.7039	5.85	0	53	273364	1	7491
	K.LYKELPDPQESIQR.A		3		572.6398	1714.8975	1714.8890	4.97	1	(29)	-149576	1	7930
	K.LYKELPDPQESIQR.A		3		858.4561	1714.8977	1714.8890	5.09	1	41	211470	1	7931
	R.ESKPPDSSKDECMVK.W		1		434.9538	1735.7861	1735.7757	6.01	1	29	149576	1	8033
	R.ESKPPDSSKDECMVK.W		1		579.6028	1735.7867	1735.7757	6.35	1	(20)	-103156	1	8035
	K.DKPDNFQLFQSPHGK.D		2		586.6283	1756.8631	1756.8533	5.57	0	(32)	-165050	1	8131
	K.DKPDNFQLFQSPHGK.D		1		879.4392	1756.8639	1756.8533	6.02	0	38	195997	1	8133
	K.DKPDNFQLFQSPHGK.D		1		440.2235	1756.8648	1756.8533	6.56	0	(31)	-159892	1	8135
	K.HSTVFDNLPNPEDRK.N		3		590.2947	1767.8622	1767.8540	4.64	1	41	211470	1	8199
	K.HSTVFDNLPNPEDRK.N		1		884.9402	1767.8658	1767.8540	6.69	1	(6)	-30946.8	1	8200
	K.GEADAMSLDGGYLYIAGK.C		3		915.9368	1829.8590	1829.8505	4.62	0	72	371362	1	8481
	K.GEADA->M<-SLDGGYLYIAGK.C		1	Oxidation (M)	923.9374	1845.8603	1845.8455	8.06	0	(5)	-25789	1	8558
	K.DGTRKPVTDAENCHLAR.G		1		647.3198	1938.9375	1938.9330	2.30	1	(64)	-330100	1	9107
	K.DGTRKPVTDAENCHLAR.G		1		485.7429	1938.9423	1938.9330	4.82	1	103	531254	1	9108
	K.DQTVIQNTDGNNNEAWAK.N		3		1009.4709	2016.9272	2016.9137	6.71	0	89	459045	1	9507
	K.DQTVIQNTDGNNNEAWAK.N		2		673.3167	2016.9283	2016.9137	7.24	0	(59)	-304311	1	9508
	K.CGLVPVLAENYKTEDGSCK.N	U	1		714.0084	2139.0033	2138.9976	2.63	1	4	20631.2	1	10104
	K.IMKGEADAMSLDGGYLYIAGK.C		1		735.0338	2202.0796	2202.0700	4.34	1	23	118630	1	10390
	R.WSGFSGGAIECETAENTEECIAK.I		1		849.3669	2545.0790	2545.0737	2.08	0	28	144419	1	11586
	K.GDVAFVKDQTVIQNTDGNNNEAWAK.N		1		912.1129	2733.3169	2733.2994	6.40	1	85	438413	1	12223
	Peptide	Unique	Matches	Modification	Observed	Mr(expt)	Mr(calc)	ppm	Miss	Score	#VALUE!	Rank	Query
	K.ILQVER.E		2		379.2342	756.4539	756.4494	6.05	0	38	195997	1	136
	R.AVDLIQK.G	U	3		393.7423	785.4701	785.4647	6.85	0	40	206312	1	240
	R.ANTFLGAK.A	U	3		411.2319	820.4493	820.4443	6.12	0	51	263048	1	523
	R.GQIVSVHR.E	U	1		448.2604	894.5062	894.5036	2.97	0	34	175365	1	923
	K.FACYSPR.V	U	1		450.7070	899.3994	899.3960	3.87	0	26	134103	1	940
	R.VDYGFQVK.V	U	2		478.2513	954.4881	954.4811	7.37	0	34	175365	1	1218
	R.TRGQVGLAR.A		1		479.2856	956.5567	956.5516	5.34	1	27	139261	1	1230
	R.ICFLHLR.R	U	1		479.7711	957.5277	957.5218	6.11	0	24	123787	1	1245
	R.RVENSISR.A	U	1		480.7670	959.5194	959.5148	4.83	1	13	67051.5	1	1257
	K.LNLKTESR.A		2		480.7791	959.5436	959.5400	3.80	1	48	247575	1	1259
	R->.<-QGSFQGGFR.S		2	Gln->pyro-Glu (N-term Q)	483.7284	965.4422	965.4356	6.90	0	(19)	-97998.3	1	1306
	R.IGVPLSVAVK.L	U	3		491.8209	981.6272	981.6223	4.99	0	60	309468	1	1411
	R.QGSFQGGFR.S		3		492.2405	982.4665	982.4621	4.51	0	54	278521	1	1418
	K.LELNVDSSK.A		2		502.7692	1003.5238	1003.5186	5.20	0	65	335257	1	1571
	K.AYRPGDTVK.L		2		503.7729	1005.5312	1005.5243	6.79	0	32	165050	1	1580
	K.AEFQGVLEK.L		2		510.7749	1019.5352	1019.5287	6.38	0	47	242417	1	1680
	K.VDFSLSSDR.D		3		513.2524	1024.4903	1024.4825	7.60	0	57	293995	1	1725
	K.SHKPLDMVK.V		2		352.1958	1053.5657	1053.5641	1.49	0	33	170208	1	1898
	K.SHKPLDMVK.V		1		527.7920	1053.5694	1053.5641	5.07	0	(12)	-61893.7	1	1900
	K.CSVFYGAPR.K	U	1		528.7534	1055.4922	1055.4859	5.98	0	27	139261	1	1918
	K.LGQYTSPVAK.R		2		532.2949	1062.5753	1062.5710	4.08	0	58	299153	1	1977
	R.FGLLGEDGEK.T		5		532.7703	1063.5260	1063.5186	6.94	0	70	361046	1	1983
	R.GQQDLEGYR.M	U	2		533.2544	1064.4942	1064.4887	5.21	0	39	201154	1	1991
	K.YVLPNFEVK.I		4		554.8077	1107.6009	1107.5964	4.06	0	48	247575	1	2291
	R.LLLFSPSVVR.I		3		565.8536	1129.6927	1129.6859	6.02	0	42	216628	1	2564
	R.YRVFALDQK.M		3		380.5466	1138.6181	1138.6135	4.02	1	(35)	-180523	1	2672
	R.YRVFALDQK.M		2		570.3164	1138.6183	1138.6135	4.21	1	40	206312	1	2674
	K.TTGLCVATPAR.L		2		573.8038	1145.5931	1145.5863	5.94	0	53	273364	1	2747
	R.DGSYGAWLHR.D	U	2		581.2775	1160.5404	1160.5363	3.52	0	55	283679	1	2840
	K.LQDAPSGQVVR.G	U	2		585.3206	1168.6266	1168.6200	5.59	0	65	335257	1	3018
	K.AAGLAFSDGDHR.T		1		608.7930	1215.5715	1215.5632	6.80	0	74	381678	1	3506
	K.AAGLAFSDGDHR.T		3		406.1979	1215.5718	1215.5632	7.05	0	(50)	-257890	1	3507
	K.KYVLPNFEVK.I		2		618.8555	1235.6965	1235.6914	4.14	1	34	175365	1	3644
	R.DMSGSPASSIPVK.V	U	3		638.3191	1274.6236	1274.6176	4.69	0	66	340415	1	4068
	R.GQIVSVHREPR.S	U	2		639.3599	1276.7053	1276.7000	4.13	1	27	139261	1	4110
	R.GQIVSVHREPR.S	U	3		426.5759	1276.7058	1276.7000	4.52	1	(19)	-97998.3	1	4111
	R.D->M<-SGSPASSIPVK.V	U	5	Oxidation (M)	646.3184	1290.6222	1290.6126	7.44	0	(22)	-113472	1	4246
	R.GSFDFPVGDAISK.I	U	2		670.3325	1338.6504	1338.6456	3.56	0	39	201154	1	4719
	K.VEEVDRFSQLR.L		2		689.3628	1376.7111	1376.7048	4.60	1	24	123787	1	5030
	K.VEEVDRFSQLR.L		2		459.9124	1376.7155	1376.7048	7.77	1	(18)	-92840.5	1	5033
	R.NPSHVNELCSPK.V		2		461.2238	1380.6495	1380.6456	2.87	0	(45)	-232101	1	5065
	R.NPSHVNELCSPK.V		2		691.3334	1380.6522	1380.6456	4.78	0	79	407467	1	5066
	K.LVDGQCQISLQK.A		4		694.8681	1387.7216	1387.7130	6.27	0	85	438413	1	5158
	K.AELADQAASWLTR.Q		1		716.3688	1430.7231	1430.7154	5.43	0	69	355889	1	5562
	K->.<-QTDMQGVNLLFSSR.R		1	Gln->pyro-Glu (N-term Q)	789.8856	1577.7567	1577.7508	3.73	0	(6)	-30946.8	1	6876
	R.FGLLGEDGEKTFLR.G		3		791.4210	1580.8274	1580.8199	4.75	1	(79)	-407467	1	6894
	R.FGLLGEDGEKTFLR.G		4		527.9507	1580.8302	1580.8199	6.55	1	79	407467	1	6900
	K.QTDMQGVNLLFSSR.R		3		798.4004	1594.7862	1594.7773	5.57	0	89	459045	1	7053
	K.QTDMQGVNLLFSSR.R		2		532.6030	1594.7873	1594.7773	6.22	0	(22)	-113472	1	7056
	R.ESRVQYTVCIWR.T	U	1		798.9010	1595.7874	1595.7878	-0.25	1	1	5157.81	1	7063
	K.QTD->M<-QGVNLLFSSR.R		2	Oxidation (M)	806.3984	1610.7823	1610.7723	6.25	0	(77)	-397151	1	7180
	R.DDGPFHDPCPVIHR.E	U	2		554.5914	1660.7523	1660.7417	6.40	0	33	170208	1	7598
	R.ALVALGAVDTALYAVGGK.S		1		844.9895	1687.9644	1687.9509	8.05	0	57	293995	1	7747
	K.AAGLAFSDGDHRTEIR.K		3		572.6243	1714.8510	1714.8387	7.17	1	46	237259	1	7923
	K.AAGLAFSDGDHRTEIR.K		1		858.4332	1714.8518	1714.8387	7.64	1	(30)	-154734	1	7924
	K.AAGLAFSDGDHRTEIRK.S		2		615.3225	1842.9455	1842.9336	6.45	2	19	97998.3	1	8524
	R.TLEIPGNSDPNIIPEGDFK.S	U	4		1028.5206	2055.0267	2055.0160	5.19	0	41	211470	1	9726
	K.MRPATDILTVTVENSQGFR.V	U	2		712.3731	2134.0975	2134.0841	6.28	0	30	154734	1	10073
	R.AMELLQEEDLIEEDDIPVR.S		1		753.0389	2256.0948	2256.0831	5.19	0	(71)	-366204	1	10605
	R.AMELLQEEDLIEEDDIPVR.S		2		1129.0558	2256.0970	2256.0831	6.17	0	94	484834	1	10607
	R.A->M<-ELLQEEDLIEEDDIPVR.S		2	Oxidation (M)	1137.0521	2272.0897	2272.0780	5.14	0	(78)	-402309	1	10688
	K.NQDFEQNTDGSGQVIVSIGVPR.T	U	3		787.3922	2359.1546	2359.1404	6.01	0	7	36104.6	1	11011
	K.GDPQYLLDSNSWIEEMPSER.M	U	1		1183.5346	2365.0545	2365.0532	0.57	0	2	10315.6	1	11036
	R.LYVAAAVIESPGGEMEEAELTSWR.F	U	2		870.0968	2607.2686	2607.2526	6.12	0	17	87682.7	1	11785
Q7SIH1	Alpha-2-macroglobulin OS=Bos taurus GN=A2M PE=1 SV=2	168953	2065	150(86)	50(40)	1.41	36%	Q7SIH1_uniprot		0.000887821	4.57921	-0.19	5.71
	Peptide	Unique	Matches	Modification	Observed	Mr(expt)	Mr(calc)	ppm	Miss	Score	#VALUE!	Rank	Query
	R.GIPFTGK.V		3		360.2098	718.4050	718.4014	5.05	0	29	149576	1	24
	K.GTSLSIR.V		2		367.2157	732.4168	732.4130	5.18	0	34	175365	1	72
	K.VLLVDGK.G		2		372.2387	742.4628	742.4589	5.27	0	32	165050	1	86
	K.YNILPK.K		3		374.2261	746.4376	746.4326	6.62	0	25	128945	1	101
	R.GEAFTLK.A		3		383.2128	764.4110	764.4068	5.50	0	41	211470	1	182
	K.FEVQVR.M		2		389.2183	776.4221	776.4181	5.23	0	32	165050	1	220
	K.AGALCLSR.D		1		424.2293	846.4441	846.4382	7.06	0	53	273364	1	727
	K.VSESLSLK.L	U	2		431.7496	861.4846	861.4807	4.48	0	46	237259	1	792
	R.RGIPFTGK.V		1		438.2602	874.5059	874.5025	3.96	1	30	154734	1	873
	R.DLKPAIVK.V		2		442.2866	882.5586	882.5538	5.37	0	35	180523	1	918
	R.VTMNMCR.K		1		456.1999	910.3853	910.3823	3.27	0	29	149576	1	1017
	K.RQEFEMK.I		1		484.2391	966.4636	966.4593	4.46	1	11	56735.9	1	1318
	K.IKGTSLSIR.V		1		487.8060	973.5974	973.5920	5.59	1	25	128945	1	1358
	K.ATVLNYLPK.C		3		509.8024	1017.5902	1017.5859	4.31	0	23	118630	1	1662
	R.YGAATFTSAR.K		3		522.7623	1043.5100	1043.5036	6.12	0	58	299153	1	1804
	R->.<-QTVSWAVTPK.S		1	Gln->pyro-Glu (N-term Q)	550.2966	1098.5787	1098.5710	7.03	0	(26)	-134103	1	2225
	R.SLFTDVVAEK.D		3		554.8011	1107.5876	1107.5812	5.81	0	64	330100	1	2285
	R.QTVSWAVTPK.S		6		558.8086	1115.6027	1115.5975	4.69	0	63	324942	1	2398
	R.STGTLLNNAIK.G	U	4		566.3248	1130.6351	1130.6295	4.95	0	51	263048	1	2576
	K.GATEITTTITK.L		3		568.3162	1134.6179	1134.6132	4.11	0	52	268206	1	2609
	K.LPPNVVEESAR.A	U	6		605.8290	1209.6434	1209.6353	6.68	0	71	366204	1	3463
	R.LLTEDIYQPR.A	U	1		416.5610	1246.6613	1246.6557	4.46	0	(14)	-72209.3	1	3770
	R.LLTEDIYQPR.A	U	3		624.3381	1246.6617	1246.6557	4.79	0	77	397151	1	3773
	K.LSFVTVDSNLR.R		3		625.8430	1249.6715	1249.6667	3.87	0	57	293995	1	3806
	R.YEIEHCLANK.V	U	2		638.8075	1275.6004	1275.5917	6.83	0	72	371362	1	4081
	R.YEIEHCLANK.V	U	1		426.2079	1275.6018	1275.5917	7.92	0	(30)	-154734	1	4084
	R.DTGLGLSPTASLR.V		6		644.3520	1286.6894	1286.6830	4.97	0	62	319784	1	4187
	K.TQTVQAHYVLK.G		2		644.3621	1286.7097	1286.6983	8.86	0	23	118630	1	4196
	R.NALFCLDSAWK.S		2		662.8249	1323.6352	1323.6281	5.35	0	68	350731	1	4670
	R.SNSFVYLEPLPR.E		4		711.3778	1420.7411	1420.7350	4.24	0	62	319784	1	5497
	K.IQEEGTEVELTGK.G		4		716.8666	1431.7187	1431.7093	6.59	0	76	391993	1	5565
	R.TEVLTSLYEEAVK.E		2		741.3949	1480.7752	1480.7661	6.20	0	66	340415	1	6075
	R.ASFSVLGDILGSAMR.N	U	1		762.4072	1522.7999	1522.7814	12.2	0	1	5157.81	1	6387
	K.HFDGSYSTFGEHR.G	U	1		513.8945	1538.6616	1538.6539	5.01	0	24	123787	1	6500
	K.HFDGSYSTFGEHR.G	U	1		770.3391	1538.6635	1538.6539	6.29	0	(10)	-51578.1	1	6502
	R.GNSEGNTWLTAFVLK.S	U	1		818.9258	1635.8370	1635.8257	6.93	0	89	459045	1	7428
	R.RTEVLTSLYEEAVK.E		1		819.4457	1636.8769	1636.8672	5.96	1	37	190839	1	7439
	R.RTEVLTSLYEEAVK.E		2		546.6335	1636.8788	1636.8672	7.10	1	(25)	-128945	1	7440
	R.TEVSNNHVLIYLDK.V		1		822.9375	1643.8604	1643.8519	5.22	0	30	154734	1	7496
	K.DTIIKPLLVEPEGLEK.E	U	2		897.5212	1793.0278	1793.0186	5.14	0	50	257890	1	8318
	K.DTIIKPLLVEPEGLEK.E	U	3		598.6833	1793.0280	1793.0186	5.27	0	(35)	-180523	1	8321
	R.NPSNCYGEESNAVCEK.F		1		929.3767	1856.7387	1856.7305	4.44	0	11	56735.9	1	8635
	R.LLIYAILPDGEVVGDSAR.Y		1		951.0278	1900.0411	1900.0306	5.55	0	53	273364	1	8853
	R.LLIYAILPDGEVVGDSAR.Y		1		634.3547	1900.0424	1900.0306	6.23	0	(0)	0	1	8854
	R.KDTIIKPLLVEPEGLEK.E	U	2		641.3819	1921.1239	1921.1135	5.38	1	45	232101	1	8976
	R.DFVHFDDTSEPPTETVR.K		3		996.4591	1990.9037	1990.8909	6.42	0	68	350731	1	9387
	R.DFVHFDDTSEPPTETVR.K		5		664.6420	1990.9043	1990.8909	6.72	0	(33)	-170208	1	9389
	K.GSGGTAEHPFTVEEFVLPK.F		2		1001.5052	2000.9958	2000.9844	5.72	0	27	139261	1	9445
	K.GSGGTAEHPFTVEEFVLPK.F		2		668.0059	2000.9959	2000.9844	5.78	0	(25)	-128945	1	9446
	K.FSGELNNEGCFSQQVNTK.I	U	2		1029.9672	2057.9198	2057.9113	4.13	0	79	407467	1	9735
	R.DFVHFDDTSEPPTETVRK.Y		2		707.3382	2118.9928	2118.9858	3.27	1	(12)	-61893.7	1	10003
	R.DFVHFDDTSEPPTETVRK.Y		1		530.7571	2118.9992	2118.9858	6.31	1	19	97998.3	1	10006
	R.NRDFVHFDDTSEPPTETVR.K		6		754.6889	2261.0449	2261.0349	4.41	1	87	448729	1	10631
	R.NRDFVHFDDTSEPPTETVR.K		1		1131.5298	2261.0450	2261.0349	4.47	1	(7)	-36104.6	1	10632
	R.HFPPAAATDTAADAHDPARPGAK.V	U	1		762.3789	2284.1149	2284.0985	7.19	0	(8)	-41262.4	1	10751
	R.HFPPAAATDTAADAHDPARPGAK.V	U	7		572.0363	2284.1162	2284.0985	7.75	0	45	232101	1	10753
	R.NRDFVHFDDTSEPPTETVRK.Y		3		797.3880	2389.1422	2389.1299	5.15	2	(20)	-103156	1	11104
	R.NRDFVHFDDTSEPPTETVRK.Y		3		598.2940	2389.1467	2389.1299	7.04	2	26	134103	1	11106
	K.QQNCQGGFSSTQDTVVALHALSR.Y		2		835.4074	2503.2004	2503.1874	5.19	0	71	366204	1	11362
	K.VYDYYETDEFAVAEYSAPCSK.D		1		836.3617	2506.0632	2506.0522	4.40	0	2	10315.6	1	11373
	K.IQEEGTEVELTGKGATEITTTITK.L		2		850.4495	2548.3266	2548.3120	5.73	1	31	159892	1	11609
	K.NEESLVFVQTDKPIYKPEQTVK.F		2		864.7946	2591.3620	2591.3483	5.31	0	21	108314	1	11739
	K.NEESLVFVQTDKPIYKPEQTVK.F		2		648.8484	2591.3647	2591.3483	6.34	0	(13)	-67051.5	1	11742
	R.SGTHTLPVEQGDMQGHFSMSVPVESDIAPVAR.L		1		845.6606	3378.6135	3378.5973	4.78	0	21	108314	1	13000
	R.SGTHTLPVEQGDMQGHFSMSVPVESDIAPVAR.L		1		1127.2153	3378.6242	3378.5973	7.95	0	(1)	-5157.81	1	13001
	Peptide	Unique	Matches	Modification	Observed	Mr(expt)	Mr(calc)	ppm	Miss	Score	#VALUE!	Rank	Query
	K.ILQVER.E		2		379.2342	756.4539	756.4494	6.05	0	38	195997	1	136
	R.TRGQVGLAR.A		1		479.2856	956.5567	956.5516	5.34	1	27	139261	1	1230
	K.LNLKTESR.A		2		480.7791	959.5436	959.5400	3.80	1	48	247575	1	1259
	R->.<-QGSFQGGFR.S		2	Gln->pyro-Glu (N-term Q)	483.7284	965.4422	965.4356	6.90	0	(19)	-97998.3	1	1306
	R.QGSFQGGFR.S		3		492.2405	982.4665	982.4621	4.51	0	54	278521	1	1418
	K.LELNVDSSK.A		2		502.7692	1003.5238	1003.5186	5.20	0	65	335257	1	1571
	K.AYRPGDTVK.L		2		503.7729	1005.5312	1005.5243	6.79	0	32	165050	1	1580
	K.AEFQGVLEK.L		2		510.7749	1019.5352	1019.5287	6.38	0	47	242417	1	1680
	K.VDFSLSSDR.D		3		513.2524	1024.4903	1024.4825	7.60	0	57	293995	1	1725
	K.SHKPLDMVK.V		2		352.1958	1053.5657	1053.5641	1.49	0	33	170208	1	1898
	K.SHKPLDMVK.V		1		527.7920	1053.5694	1053.5641	5.07	0	(12)	-61893.7	1	1900
	K.LGQYTSPVAK.R		2		532.2949	1062.5753	1062.5710	4.08	0	58	299153	1	1977
	R.FGLLGEDGEK.T		5		532.7703	1063.5260	1063.5186	6.94	0	70	361046	1	1983
	K.YVLPNFEVK.I		4		554.8077	1107.6009	1107.5964	4.06	0	48	247575	1	2291
	R.LLLFSPSVVR.I		3		565.8536	1129.6927	1129.6859	6.02	0	42	216628	1	2564
	R.YRVFALDQK.M		3		380.5466	1138.6181	1138.6135	4.02	1	(35)	-180523	1	2672
	R.YRVFALDQK.M		2		570.3164	1138.6183	1138.6135	4.21	1	40	206312	1	2674
	K.TTGLCVATPAR.L		2		573.8038	1145.5931	1145.5863	5.94	0	53	273364	1	2747
	K.AAGLAFSDGDHR.T		1		608.7930	1215.5715	1215.5632	6.80	0	74	381678	1	3506
	K.AAGLAFSDGDHR.T		3		406.1979	1215.5718	1215.5632	7.05	0	(50)	-257890	1	3507
	K.KYVLPNFEVK.I		2		618.8555	1235.6965	1235.6914	4.14	1	34	175365	1	3644
	R.DMSGSPASGIPVK.V	U	4		623.3143	1244.6141	1244.6071	5.64	0	70	361046	1	3725
	R.D->M<-SGSPASGIPVK.V	U	7	Oxidation (M)	631.3111	1260.6076	1260.6020	4.48	0	(35)	-180523	1	3923
	R.FVSSPFSLDLSK.T	U	3		663.8544	1325.6943	1325.6867	5.72	0	77	397151	1	4676
	K.VEEVDRFSQLR.L		2		689.3628	1376.7111	1376.7048	4.60	1	24	123787	1	5030
	K.VEEVDRFSQLR.L		2		459.9124	1376.7155	1376.7048	7.77	1	(18)	-92840.5	1	5033
	R.NPSHVNELCSPK.V		2		461.2238	1380.6495	1380.6456	2.87	0	(45)	-232101	1	5065
	R.NPSHVNELCSPK.V		2		691.3334	1380.6522	1380.6456	4.78	0	79	407467	1	5066
	K.LVDGQCQISLQK.A		4		694.8681	1387.7216	1387.7130	6.27	0	85	438413	1	5158
	K.AELADQAASWLTR.Q		1		716.3688	1430.7231	1430.7154	5.43	0	69	355889	1	5562
	K->.<-QTDMQGVNLLFSSR.R		1	Gln->pyro-Glu (N-term Q)	789.8856	1577.7567	1577.7508	3.73	0	(6)	-30946.8	1	6876
	R.FGLLGEDGEKTFLR.G		3		791.4210	1580.8274	1580.8199	4.75	1	(79)	-407467	1	6894
	R.FGLLGEDGEKTFLR.G		4		527.9507	1580.8302	1580.8199	6.55	1	79	407467	1	6900
	K.QTDMQGVNLLFSSR.R		3		798.4004	1594.7862	1594.7773	5.57	0	89	459045	1	7053
	K.QTDMQGVNLLFSSR.R		2		532.6030	1594.7873	1594.7773	6.22	0	(22)	-113472	1	7056
	K.QTD->M<-QGVNLLFSSR.R		2	Oxidation (M)	806.3984	1610.7823	1610.7723	6.25	0	(77)	-397151	1	7180
	R.ALVALGAVDTALYAVGGK.S		1		844.9895	1687.9644	1687.9509	8.05	0	57	293995	1	7747
	K.AAGLAFSDGDHRTEIR.K		3		572.6243	1714.8510	1714.8387	7.17	1	46	237259	1	7923
	K.AAGLAFSDGDHRTEIR.K		1		858.4332	1714.8518	1714.8387	7.64	1	(30)	-154734	1	7924
	R.DFILLNVPIPQEQAR.V	U	1		876.9905	1751.9664	1751.9570	5.37	0	17	87682.7	1	8120
	K.AAGLAFSDGDHRTEIRK.S		2		615.3225	1842.9455	1842.9336	6.45	2	19	97998.3	1	8524
	R.AMELLQEEDLIEEDDIPVR.S		1		753.0389	2256.0948	2256.0831	5.19	0	(71)	-366204	1	10605
	R.AMELLQEEDLIEEDDIPVR.S		2		1129.0558	2256.0970	2256.0831	6.17	0	94	484834	1	10607
	R.A->M<-ELLQEEDLIEEDDIPVR.S		2	Oxidation (M)	1137.0521	2272.0897	2272.0780	5.14	0	(78)	-402309	1	10688
	K.NRDFEQNTDGSGQVIVSIGVPR.T	U	3		796.7402	2387.1987	2387.1830	6.58	1	14	72209.3	1	11093
B0JYN6	Alpha-2-HS-glycoprotein OS=Bos taurus GN=AHSG PE=2 SV=1	39193	1639	86(61)	15(14)	5.45	42%	B0JYN6_uniprot		0.00219427	11.3176	-0.025	5.26
P12763	Alpha-2-HS-glycoprotein OS=Bos taurus GN=AHSG PE=1 SV=2	39193	1639	86(61)	15(14)		42%	P12763_uniprot			0
	Peptide	Unique	Matches	Modification	Observed	Mr(expt)	Mr(calc)	ppm	Miss	Score	#VALUE!	Rank	Query
	R.IRYFK.I	U	4		363.7203	725.4261	725.4224	5.11	1	18	92840.5	1	43
	R.AHYDLR.H	U	6		387.7003	773.3861	773.3820	5.26	0	37	190839	1	210
	K.QYGFCK.G	U	3		401.6834	801.3522	801.3480	5.30	0	20	103156	1	413
	K.ALGGEDVR.V	U	1		408.7160	815.4175	815.4137	4.64	0	37	190839	1	498
	K.CNLLAEK.Q	U	2		424.2241	846.4336	846.4269	7.87	0	49	252732	1	725
	K.HTLNQIDSVK.V	U	1		385.5446	1153.6121	1153.6091	2.59	0	(39)	-201154	1	2777
	K.HTLNQIDSVK.V	U	8		577.8152	1153.6158	1153.6091	5.81	0	75	386835	1	2782
	K->.<-QDGQFSVLFTK.C	U	6	Gln->pyro-Glu (N-term Q)	626.8173	1251.6200	1251.6136	5.10	0	(52)	-268206	1	3835
	K.QDGQFSVLFTK.C	U	1		423.8884	1268.6435	1268.6401	2.63	0	(19)	-97998.3	1	3996
	K.QDGQFSVLFTK.C	U	14		635.3303	1268.6460	1268.6401	4.61	0	80	412624	1	4001
	K.CDSSPDSAEDVR.K	U	1		669.2712	1336.5278	1336.5201	5.75	0	74	381678	1	4711
	K.CDSSPDSAEDVRK.L	U	1		489.2155	1464.6246	1464.6151	6.51	1	47	242417	1	5893
	K.TPIVGQPSIPGGPVR.L	U	3		492.2868	1473.8386	1473.8304	5.56	0	(35)	-180523	1	6014
	K.TPIVGQPSIPGGPVR.L	U	5		737.9271	1473.8396	1473.8304	6.23	0	77	397151	1	6015
	R.GYKHTLNQIDSVK.V	U	2		376.4564	1501.7966	1501.7889	5.13	1	(9)	-46420.2	1	6287
	R.GYKHTLNQIDSVK.V	U	3		501.6068	1501.7986	1501.7889	6.47	1	52	268206	1	6291
	R.GYKHTLNQIDSVK.V	U	1		751.9070	1501.7995	1501.7889	7.09	1	(8)	-41262.4	1	6293
	K.EVVDPTKCNLLAEK.Q	U	4		808.4242	1614.8338	1614.8287	3.18	1	80	412624	1	7218
	K.EVVDPTKCNLLAEK.Q	U	4		539.2869	1614.8388	1614.8287	6.25	1	(58)	-299153	1	7225
	R->.<-QQTQHAVEGDCDIHVLK.Q	U	1	Gln->pyro-Glu (N-term Q)	980.9684	1959.9223	1959.9109	5.83	0	(53)	-273364	1	9227
	R->.<-QQTQHAVEGDCDIHVLK.Q	U	2	Gln->pyro-Glu (N-term Q)	654.3152	1959.9237	1959.9109	6.55	0	87	448729	1	9229
	R.QQTQHAVEGDCDIHVLK.Q	U	2		495.2437	1976.9459	1976.9374	4.26	0	(32)	-165050	1	9312
	R.QQTQHAVEGDCDIHVLK.Q	U	1		989.4805	1976.9465	1976.9374	4.59	0	(71)	-366204	1	9314
	R.QQTQHAVEGDCDIHVLK.Q	U	3		659.9895	1976.9467	1976.9374	4.67	0	(47)	-242417	1	9315
	R.HTFSGVASVESSSGEAFHVGK.T	U	2		707.3428	2119.0067	2118.9971	4.53	0	30	154734	1	10010
	K.EPACDDPDTEQAALAAVDYINK.H	U	2		1203.5476	2405.0807	2405.0693	4.74	0	86	443571	1	11138
	K.EPACDDPDTEQAALAAVDYINK.H	U	3		802.7014	2405.0822	2405.0693	5.39	0	(59)	-304311	1	11139
P34955	Alpha-1-antiproteinase OS=Bos taurus GN=SERPINA1 PE=1 SV=1	46417	1408	103(50)	22(16)	3.23	34%	P34955_uniprot		0.00221901	11.4452	-0.056	6.05
	Peptide	Unique	Matches	Modification	Observed	Mr(expt)	Mr(calc)	ppm	Miss	Score	#VALUE!	Rank	Query
	K.IVELVK.V	U	5		350.7356	699.4566	699.4531	5.12	0	33	170208	1	2
	K.VPMMNR.L	U	1		374.1880	746.3614	746.3567	6.29	0	22	113472	1	94
	K.SPLFVGK.V	U	4		374.2256	746.4367	746.4327	5.45	0	38	195997	1	99
	K.VPM->M<-NR.L	U	3	Oxidation (M)	382.1842	762.3539	762.3517	2.96	0	(11)	-56735.9	1	171
	K.VP->M<-MNR.L	U	1	Oxidation (M)	382.1850	762.3555	762.3517	5.06	0	(20)	-103156	1	173
	R.ADLSGITK.E	U	2		402.7290	803.4434	803.4389	5.69	0	45	232101	1	428
	K.AALTIDEK.G	U	2		430.7419	859.4691	859.4651	4.74	0	54	278521	1	787
	K.INDYVEK.G	U	1		440.7266	879.4386	879.4338	5.45	0	40	206312	1	893
	K.LNNELLAK.F	U	2		457.7724	913.5303	913.5232	7.74	0	54	278521	1	1042
	K.KINDYVEK.G	U	1		504.7738	1007.5331	1007.5287	4.34	1	51	263048	1	1581
	K.GNTHTEILK.G	U	1		506.7770	1011.5393	1011.5349	4.40	0	44	226943	1	1608
	K.WEKPFEMK.H	U	1		365.5177	1093.5312	1093.5266	4.17	0	(10)	-51578.1	1	2178
	K.WEKPFEMK.H	U	1		547.7730	1093.5315	1093.5266	4.43	0	31	159892	1	2180
	K.KKINDYVEK.G	U	1		379.5494	1135.6262	1135.6237	2.23	2	14	72209.3	1	2628
	K.LSISETYDLK.S	U	27		584.8112	1167.6078	1167.6023	4.69	0	75	386835	1	2960
	K.LVDTFLEDVK.N	U	4		589.8213	1177.6280	1177.6231	4.22	0	71	366204	1	3092
	K.YASSANLHLPK.L	U	4		400.8856	1199.6349	1199.6298	4.26	0	(43)	-221786	1	3320
	K.YASSANLHLPK.L	U	5		600.8252	1199.6358	1199.6298	5.01	0	70	361046	1	3322
	K.GKWEKPFEMK.H	U	1		640.3323	1278.6501	1278.6431	5.53	1	7	36104.6	1	4125
	R.DFHVDEQTTVK.V	U	3		440.2167	1317.6283	1317.6201	6.21	0	(46)	-237259	1	4590
	R.DFHVDEQTTVK.V	U	3		659.8215	1317.6284	1317.6201	6.28	0	48	247575	1	4591
	K.INDYVEKGSHGK.I	U	2		449.5639	1345.6700	1345.6626	5.46	1	46	237259	1	4827
	K.INDYVEKGSHGK.I	U	2		673.8427	1345.6709	1345.6626	6.13	1	(31)	-159892	1	4828
	R.ADLSGITKEQPLK.V	U	1		700.3981	1398.7816	1398.7718	6.98	1	8	41262.4	1	5294
	K.SVLGDVGITEVFSDR.A	U	16		797.4136	1592.8126	1592.8046	5.00	0	97	500307	1	7016
	K.SVLGDVGITEVFSDR.A	U	2		531.9449	1592.8128	1592.8046	5.16	0	(48)	-247575	1	7019
	K.LQQLEDKLNNELLAK.F	U	2		884.9995	1767.9845	1767.9730	6.48	1	81	417782	1	8207
	K.LQQLEDKLNNELLAK.F	U	2		590.3362	1767.9869	1767.9730	7.85	1	(59)	-304311	1	8209
	R.DFHVDEQTTVKVPMMNR.L	U	1		512.5023	2045.9802	2045.9663	6.79	1	24	123787	1	9701
	K.SVLGDVGITEVFSDRADLSGITK.E	U	2		793.7571	2378.2496	2378.2329	7.00	1	18	92840.5	1	11072
F1N1I6	Gelsolin OS=Bos taurus GN=GSN PE=4 SV=1	85976	1367	78(53)	24(19)	1.64	27%	F1N1I6_uniprot		0.00090723	4.67932	-0.409	5.86
	Peptide	Unique	Matches	Modification	Observed	Mr(expt)	Mr(calc)	ppm	Miss	Score	#VALUE!	Rank	Query
	R.TPITVVK.Q	U	2		379.2465	756.4784	756.4745	5.05	0	33	170208	1	139
	R.AVEVMPK.A	U	2		387.2160	772.4174	772.4153	2.78	0	50	257890	1	206
	K.TASDFISK.M	U	2		434.7263	867.4381	867.4338	4.95	0	39	201154	1	813
	K.TGALELLR.V	U	4		436.7660	871.5174	871.5127	5.43	0	68	350731	1	849
	R.RTPITVVK.Q	U	2		457.2971	912.5797	912.5757	4.49	1	31	159892	1	1034
	K.EPGLQIWR.V	U	4		499.7778	997.5410	997.5345	6.56	0	42	216628	1	1536
	R.YIETDPANR.D	U	2		539.7649	1077.5152	1077.5091	5.72	0	43	221786	1	2032
	K.RYIETDPANR.D	U	1		617.8142	1233.6137	1233.6102	2.90	1	24	123787	1	3620
	K.AGKEPGLQIWR.V	U	3		418.9051	1253.6934	1253.6880	4.24	1	67	345573	1	3864
	K.AGKEPGLQIWR.V	U	3		627.8541	1253.6937	1253.6880	4.53	1	(46)	-237259	1	3865
	K.HVVPNEVVVQR.L	U	3		638.3651	1274.7157	1274.7095	4.81	0	63	324942	1	4076
	K.HVVPNEVVVQR.L	U	3		425.9125	1274.7157	1274.7095	4.84	0	(48)	-247575	1	4077
	R.LATPARPGATQAR.A	U	1		655.3728	1308.7310	1308.7262	3.70	0	(13)	-67051.5	1	4493
	R.LATPARPGATQAR.A	U	1		437.2515	1308.7328	1308.7262	5.00	0	22	113472	1	4494
	K.AGALNSNDAFVLK.T	U	3		660.3547	1318.6948	1318.6881	5.09	0	75	386835	1	4604
	R.SEDCFILDHGK.D	U	2		660.8018	1319.5890	1319.5816	5.58	0	56	288837	1	4617
	R.SEDCFILDHGK.D	U	2		440.8704	1319.5893	1319.5816	5.80	0	(35)	-180523	1	4619
	R.YIETDPANRDR.R	U	2		450.5544	1348.6415	1348.6371	3.25	1	(21)	-108314	1	4849
	R.YIETDPANRDR.R	U	2		675.3281	1348.6417	1348.6371	3.41	1	23	118630	1	4850
	K.RYIETDPANRDR.R	U	1		502.5886	1504.7441	1504.7382	3.92	2	11	56735.9	1	6316
	R.YIETDPANRDRR.T	U	1		753.3807	1504.7469	1504.7382	5.79	2	3	15473.4	2	6317
	R.SEDCFILDHGKDGK.I	U	2		810.8737	1619.7329	1619.7250	4.88	1	76	391993	1	7254
	R.SEDCFILDHGKDGK.I	U	3		540.9183	1619.7330	1619.7250	4.94	1	(52)	-268206	1	7255
	R.SEDCFILDHGKDGK.I	U	1		405.9409	1619.7345	1619.7250	5.85	1	(12)	-61893.7	1	7259
	K.DSQEEEKTEALTSAK.R	U	1		555.9343	1664.7812	1664.7740	4.27	1	(34)	-175365	1	7621
	K.DSQEEEKTEALTSAK.R	U	1		833.3986	1664.7827	1664.7740	5.19	1	101	520938	1	7622
	R.EVQGFESATFLGYFK.S	U	1		861.9286	1721.8427	1721.8301	7.35	0	47	242417	1	7966
	K.TPSAAYLWVGAGASEAEK.T	U	2		603.3026	1806.8860	1806.8788	3.99	0	(31)	-159892	1	8385
	K.TPSAAYLWVGAGASEAEK.T	U	3		904.4509	1806.8873	1806.8788	4.71	0	62	319784	1	8388
	R->.<-QTQVSVLPEGGETPLFK.Q	U	3	Gln->pyro-Glu (N-term Q)	906.9775	1811.9405	1811.9306	5.50	0	(9)	-46420.2	1	8411
	K.DSQEEEKTEALTSAKR.Y	U	1		607.9686	1820.8841	1820.8752	4.89	2	56	288837	1	8440
	K.DSQEEEKTEALTSAKR.Y	U	1		456.2285	1820.8851	1820.8752	5.46	2	(14)	-72209.3	1	8441
	K.DSQEEEKTEALTSAKR.Y	U	1		911.4502	1820.8858	1820.8752	5.87	2	(8)	-41262.4	1	8442
	R.QTQVSVLPEGGETPLFK.Q	U	5		915.4903	1828.9660	1828.9571	4.90	0	88	453887	1	8473
	R.AQPVQVAEGSEPDSFWEALGGK.A	U	2		768.0415	2301.1027	2301.0913	4.93	0	(59)	-304311	1	10823
	R.AQPVQVAEGSEPDSFWEALGGK.A	U	3		1151.5587	2301.1029	2301.0913	5.02	0	90	464202	1	10824
	R.DPDQTDGPGLSYLSSHIANVER.V	U	2		791.0466	2370.1181	2370.1088	3.92	0	40	206312	1	11048
K4JF16	Alpha-2-macroglobulin variant 23 OS=Bos taurus GN=A2M PE=2 SV=1	102208	953	91(48)	33(24)	1.34	38%	K4JF16_uniprot		0.000890341	4.59221	-0.203	5.68
	Peptide	Unique	Matches	Modification	Observed	Mr(expt)	Mr(calc)	ppm	Miss	Score	#VALUE!	Rank	Query
	R.GIPFTGK.V		3		360.2098	718.4050	718.4014	5.05	0	29	149576	1	24
	K.GTSLSIR.V		2		367.2157	732.4168	732.4130	5.18	0	34	175365	1	72
	K.VLLVDGK.G		2		372.2387	742.4628	742.4589	5.27	0	32	165050	1	86
	R.GEAFTLK.A		3		383.2128	764.4110	764.4068	5.50	0	41	211470	1	182
	K.FEVQVR.M		2		389.2183	776.4221	776.4181	5.23	0	32	165050	1	220
	K.AGALCLSR.D		1		424.2293	846.4441	846.4382	7.06	0	53	273364	1	727
	R.RGIPFTGK.V		1		438.2602	874.5059	874.5025	3.96	1	30	154734	1	873
	R.DLKPAIVK.V		2		442.2866	882.5586	882.5538	5.37	0	35	180523	1	918
	R.VTMNMCR.K		1		456.1999	910.3853	910.3823	3.27	0	29	149576	1	1017
	K.RQEFEMK.I		1		484.2391	966.4636	966.4593	4.46	1	11	56735.9	1	1318
	K.IKGTSLSIR.V		1		487.8060	973.5974	973.5920	5.59	1	25	128945	1	1358
	K.ATVLNYLPK.C		3		509.8024	1017.5902	1017.5859	4.31	0	23	118630	1	1662
	R.SLFTDVVAEK.D		3		554.8011	1107.5876	1107.5812	5.81	0	64	330100	1	2285
	K.GATEITTTITK.L		3		568.3162	1134.6179	1134.6132	4.11	0	52	268206	1	2609
	K.LSFVTVDSNLR.R		3		625.8430	1249.6715	1249.6667	3.87	0	57	293995	1	3806
	R.DTGLGLSPTASLR.V		6		644.3520	1286.6894	1286.6830	4.97	0	62	319784	1	4187
	K.TQTVQAHYVLK.G		2		644.3621	1286.7097	1286.6983	8.86	0	23	118630	1	4196
	R.YEVEHCLDNK.V		1		436.1976	1305.5709	1305.5659	3.79	0	(8)	-41262.4	1	4417
	R.YEVEHCLDNK.V		1		653.7935	1305.5725	1305.5659	5.02	0	21	108314	1	4418
	R.SNSFVYLEPLPR.E		4		711.3778	1420.7411	1420.7350	4.24	0	62	319784	1	5497
	K.IQEEGTEVELTGK.G		4		716.8666	1431.7187	1431.7093	6.59	0	76	391993	1	5565
	R.TEVSNNHVLIYLDK.V		1		822.9375	1643.8604	1643.8519	5.22	0	30	154734	1	7496
	R.NPSNCYGEESNAVCEK.F		1		929.3767	1856.7387	1856.7305	4.44	0	11	56735.9	1	8635
	R.LLIYAILPDGEVVGDSAR.Y		1		951.0278	1900.0411	1900.0306	5.55	0	53	273364	1	8853
	R.LLIYAILPDGEVVGDSAR.Y		1		634.3547	1900.0424	1900.0306	6.23	0	(0)	0	1	8854
	R.DFVHFDDTSEPPTETVR.K		3		996.4591	1990.9037	1990.8909	6.42	0	68	350731	1	9387
	R.DFVHFDDTSEPPTETVR.K		5		664.6420	1990.9043	1990.8909	6.72	0	(33)	-170208	1	9389
	K.GSGGTAEHPFTVEEFVLPK.F		2		1001.5052	2000.9958	2000.9844	5.72	0	27	139261	1	9445
	K.GSGGTAEHPFTVEEFVLPK.F		2		668.0059	2000.9959	2000.9844	5.78	0	(25)	-128945	1	9446
	K.FSGQLNNEGCFSQQVNTK.I		1		1029.4757	2056.9369	2056.9273	4.67	0	20	103156	1	9733
	R.DFVHFDDTSEPPTETVRK.Y		2		707.3382	2118.9928	2118.9858	3.27	1	(12)	-61893.7	1	10003
	R.DFVHFDDTSEPPTETVRK.Y		1		530.7571	2118.9992	2118.9858	6.31	1	19	97998.3	1	10006
	R.NRDFVHFDDTSEPPTETVR.K		6		754.6889	2261.0449	2261.0349	4.41	1	87	448729	1	10631
	R.NRDFVHFDDTSEPPTETVR.K		1		1131.5298	2261.0450	2261.0349	4.47	1	(7)	-36104.6	1	10632
	R.NRDFVHFDDTSEPPTETVRK.Y		3		797.3880	2389.1422	2389.1299	5.15	2	(20)	-103156	1	11104
	R.NRDFVHFDDTSEPPTETVRK.Y		3		598.2940	2389.1467	2389.1299	7.04	2	26	134103	1	11106
	K.VYDYYETDEFAVAEYSAPCSK.D		1		836.3617	2506.0632	2506.0522	4.40	0	2	10315.6	1	11373
	K.IQEEGTEVELTGKGATEITTTITK.L		2		850.4495	2548.3266	2548.3120	5.73	1	31	159892	1	11609
	K.NEESLVFVQTDKPIYKPEQTVK.F		2		864.7946	2591.3620	2591.3483	5.31	0	21	108314	1	11739
	K.NEESLVFVQTDKPIYKPEQTVK.F		2		648.8484	2591.3647	2591.3483	6.34	0	(13)	-67051.5	1	11742
	R.SGTHTLPVEQGDMQGHFSMSVPVESDIAPVAR.L		1		845.6606	3378.6135	3378.5973	4.78	0	21	108314	1	13000
	R.SGTHTLPVEQGDMQGHFSMSVPVESDIAPVAR.L		1		1127.2153	3378.6242	3378.5973	7.95	0	(1)	-5157.81	1	13001
A6QPP2	SERPIND1 protein OS=Bos taurus GN=SERPIND1 PE=2 SV=1	55457	809	48(29)	17(12)	1.37	29%	A6QPP2_uniprot		0.000865535	4.46426	-0.134	6.37
	Peptide	Unique	Matches	Modification	Observed	Mr(expt)	Mr(calc)	ppm	Miss	Score	#VALUE!	Rank	Query
	K.VPMMQTK.G	U	1		417.7162	833.4179	833.4139	4.76	0	32	165050	1	573
	R.IVIDLFK.H	U	4		424.2706	846.5266	846.5215	6.03	0	55	283679	1	740
	R.NFGYTLR.S	U	1		435.7299	869.4452	869.4395	6.54	0	43	221786	1	828
	R.TREVLLPK.F	U	3		478.3035	954.5924	954.5862	6.49	1	19	97998.3	1	1223
	R.LNEREVVK.V	U	1		493.7869	985.5592	985.5556	3.62	1	20	103156	1	1437
	K.DYDLVGALR.A	U	4		511.2729	1020.5312	1020.5240	7.08	0	49	252732	1	1686
	R.SVSDLYVQK.Q	U	3		519.7790	1037.5435	1037.5393	4.07	0	30	154734	1	1796
	K->.<-QLPVLDDFK.T	U	1	Gln->pyro-Glu (N-term Q)	529.2857	1056.5569	1056.5492	7.28	0	5	25789	1	1922
	R.TSCLLFLGR.V	U	3		533.7929	1065.5711	1065.5641	6.61	0	37	190839	1	2010
	R.EYYFAEVR.A	U	3		538.7585	1075.5025	1075.4974	4.73	0	32	165050	1	2023
	R.EVVKVPMMQTK.G	U	2		645.3562	1288.6978	1288.6883	7.40	1	41	211470	1	4208
	R.DDGGGEPESMEPR.W	U	1		688.2778	1374.5410	1374.5358	3.80	0	8	41262.4	1	5023
	K.LEKDYDLVGALR.A	U	1		696.3845	1390.7544	1390.7456	6.30	1	39	201154	1	5219
	K.TLESQLTPQAVER.W	U	4		736.3939	1470.7732	1470.7678	3.65	0	69	355889	1	5983
	K.TLESQLTPQAVER.W	U	3		491.2661	1470.7763	1470.7678	5.79	0	(41)	-211470	1	5988
	K.QLPVLDDFKTQVR.E	U	2		779.9345	1557.8545	1557.8515	1.90	1	18	92840.5	1	6695
	R.AADFSDPAFLAHTNR.H	U	2		816.8960	1631.7774	1631.7692	5.05	0	94	484834	1	7378
	R.AADFSDPAFLAHTNR.H	U	4		544.9334	1631.7782	1631.7692	5.52	0	(64)	-330100	1	7379
	K.GAFLAASDQELDCDVLR.L	U	3		940.4523	1878.8901	1878.8782	6.35	0	119	613779	1	8738
	K.GAFLAASDQELDCDVLR.L	U	2		627.3056	1878.8950	1878.8782	8.94	0	(21)	-108314	1	8739
F1MMD7	Inter-alpha-trypsin inhibitor heavy chain H4 OS=Bos taurus GN=ITIH4 PE=4 SV=2	101634	773	67(38)	23(19)	1.01	24%	F1MMD7_uniprot		0.000659228	3.40017	-0.234	6.22
Q5EA67	Inter-alpha (Globulin) inhibitor H4 (Plasma Kallikrein-sensitive glycoprotein) OS=Bos taurus GN=ITIH4 PE=2 SV=1	101617	773	67(38)	23(19)		24%	Q5EA67_uniprot			0
	Peptide	Unique	Matches	Modification	Observed	Mr(expt)	Mr(calc)	ppm	Miss	Score	#VALUE!	Rank	Query
	R.LCVDLR.R		2		388.2130	774.4114	774.4058	7.23	0	56	288837	1	216
	R.VYLGPMR.F		3		418.2306	834.4466	834.4422	5.33	0	40	206312	1	577
	R.VYLGP->M<-R.F		5	Oxidation (M)	426.2271	850.4397	850.4371	3.09	0	(23)	-118630	1	769
	K.GSELVVAGK.L		1		430.2484	858.4823	858.4811	1.45	0	57	293995	1	786
	R.FGHSVGDR.T		3		437.7149	873.4153	873.4093	6.87	0	33	170208	1	863
	K.NVIFVIDK.S		4		474.2844	946.5543	946.5488	5.90	0	28	144419	1	1186
	K.VRPQQLVK.H		2		484.3089	966.6032	966.5974	6.01	0	28	144419	1	1326
	R.LLLQNTDR.F		3		486.7811	971.5476	971.5400	7.89	0	48	247575	1	1348
	K.MALENGGLAR.R		3		516.2722	1030.5298	1030.5229	6.63	0	58	299153	1	1769
	R.FAHTVITSR.V		1		516.2878	1030.5611	1030.5560	4.99	0	37	190839	1	1774
	K.LDYQESPPGK.E		1		567.2790	1132.5434	1132.5400	2.99	0	19	97998.3	1	2592
	R.EATFQMELPK.K		3		597.3009	1192.5872	1192.5798	6.26	0	45	232101	1	3227
	R.FKPTLSQQQK.Y		1		402.2296	1203.6670	1203.6612	4.85	0	(10)	-51578.1	1	3395
	R.FKPTLSQQQK.Y		2		602.8409	1203.6672	1203.6612	5.02	0	31	159892	1	3397
	R.EATFQ->M<-ELPK.K		1	Oxidation (M)	605.2984	1208.5822	1208.5747	6.24	0	(1)	-5157.81	1	3448
	K.ETLYSVMPGLK.V		3		619.3319	1236.6491	1236.6424	5.46	0	22	113472	1	3657
	K.EGLLLLSRPDR.V		1		634.8731	1267.7317	1267.7248	5.41	0	18	92840.5	1	3992
	K.EGLLLLSRPDR.V		1		423.5848	1267.7327	1267.7248	6.22	0	(16)	-82524.9	1	3993
	R.EATFQMELPKK.A		1		661.3479	1320.6812	1320.6747	4.92	1	52	268206	1	4642
	R.EATFQMELPKK.A		2		441.2344	1320.6814	1320.6747	5.04	1	(33)	-170208	1	4644
	K.AAAQEQYSAAVAR.G		2		668.3395	1334.6645	1334.6578	5.01	0	70	361046	1	4703
	K.QDTVLDGSFIVR.Y	U	4		675.3590	1348.7033	1348.6987	3.45	0	74	381678	1	4859
	R.VTIGLLFWDGPGK.G		1		701.8946	1401.7746	1401.7657	6.40	0	37	190839	1	5317
	R.ELKLDYQESPPGK.E		2		752.3928	1502.7711	1502.7616	6.29	1	42	216628	1	6301
	R.ELKLDYQESPPGK.E		1		501.9310	1502.7712	1502.7616	6.34	1	(17)	-87682.7	1	6302
	K.VTFELVYEELLAR.H		2		791.4352	1580.8558	1580.8450	6.85	0	36	185681	1	6905
	K.VQNDIDIYSLTVDSK.V		1		855.4358	1708.8571	1708.8519	3.05	0	65	335257	1	7889
	K.YPEKQDTVLDGSFIVR.Y	U	4		622.9947	1865.9624	1865.9523	5.41	1	57	293995	1	8678
	K.YPEKQDTVLDGSFIVR.Y	U	4		933.9886	1865.9626	1865.9523	5.52	1	(50)	-257890	1	8679
	R.RPQELVNLLSDPDQGVEVTGHFETAK.A		1		960.4946	2878.4621	2878.4461	5.54	0	(21)	-108314	1	12466
	R.RPQELVNLLSDPDQGVEVTGHFETAK.A		2		720.6229	2878.4626	2878.4461	5.72	0	21	108314	1	12467
P06868	Plasminogen OS=Bos taurus GN=PLG PE=1 SV=2	93894	766	73(43)	32(25)	1.36	37%	P06868_uniprot		0.000777472	4.01005	-0.719	7.68
	Peptide	Unique	Matches	Modification	Observed	Mr(expt)	Mr(calc)	ppm	Miss	Score	#VALUE!	Rank	Query
	K.NTPVFR.M		2		367.2043	732.3941	732.3919	3.02	0	30	154734	1	69
	R.DVILYEK.R		2		440.2471	878.4797	878.4749	5.46	0	42	216628	1	888
	R.AFQYHSK.E		1		440.7206	879.4265	879.4239	3.02	0	20	103156	1	891
	R.IYLLECK.T		3		469.7573	937.5001	937.4943	6.21	0	36	185681	1	1128
	K.VILGAHNEK.V		1		490.7819	979.5493	979.5451	4.38	0	45	232101	1	1382
	R.TPENFPCK.N		2		496.7311	991.4476	991.4433	4.33	0	52	268206	1	1480
	R.WEFCNLK.K		2		498.7371	995.4597	995.4535	6.24	0	28	144419	1	1512
	K.LSRPAIITK.E		3		499.8241	997.6336	997.6284	5.21	0	46	237259	1	1542
	R.WSEQTPHK.H		1		506.7481	1011.4817	1011.4774	4.23	0	33	170208	1	1602
	K.RIYLLECK.T		2		547.8077	1093.6009	1093.5954	5.09	1	18	92840.5	1	2182
[truncated: 276 more rows]
